# Supplementary material for: Chronic kidney disease as a risk factor for acute community-acquired infections in high-income countries: a systematic review
Source: PubMed Central journal article supplement — BMJ Open. 2014 Apr 17;4(4):e004100. doi: 10.1136/bmjopen-2013-004100 (PMC3996818; doi:10.1136/bmjopen-2013-004100), 2014-04-17
Supplement: bmjopen-2013-004100.draft_revisions.pdf [file bmjopen-2013-004100.draft_revisions.pdf]

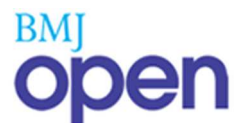

**Chronic kidney disease as a risk factor for acute community-acquired infections: a systematic review and meta-analysis**

|                                 |                                                                                                                                                                                                |
|---------------------------------|------------------------------------------------------------------------------------------------------------------------------------------------------------------------------------------------|
| Journal:                        | <i>BMJ Open</i>                                                                                                                                                                                |
| Manuscript ID:                  | bmjopen-2013-004100                                                                                                                                                                            |
| Article Type:                   | Research                                                                                                                                                                                       |
| Date Submitted by the Author:   | 23-Sep-2013                                                                                                                                                                                    |
| Complete List of Authors:       | McDonald, Helen; London School of Hygiene & Tropical Medicine, Non-Communicable Disease Epidemiology<br>Thomas, Sara; London School of Hygiene & Tropical Medicine,<br>Nitsch, Dorothea; LSHTM |
| <b>Primary Subject Heading</b>: | Epidemiology                                                                                                                                                                                   |
| Secondary Subject Heading:      | Public health, Infectious diseases, General practice / Family practice, Renal medicine                                                                                                         |
| Keywords:                       | Epidemiology < INFECTIOUS DISEASES, Nephrology < INTERNAL MEDICINE, Chronic renal failure < NEPHROLOGY, PRIMARY CARE                                                                           |
|                                 |                                                                                                                                                                                                |

SCHOLARONE™  
Manuscripts

ew only

1  
2  
3 **Title: Chronic kidney disease as a risk factor for acute community-acquired infections:**  
4  
5 **a systematic review and meta-analysis**  
6  
7

8 **Authors:** Helen I McDonald,<sup>1</sup> Sara L Thomas,<sup>2</sup> Dorothea Nitsch.<sup>1</sup>  
9

10  
11 1. Department of Non-communicable Disease Epidemiology, London School of Hygiene &  
12 Tropical Medicine, Keppel Street, London, UK.  
13

14  
15 2. Department of Infectious Disease Epidemiology, London School of Hygiene & Tropical  
16 Medicine, Keppel Street, London, UK.  
17  
18  
19

20  
21  
22 **Corresponding author:**  
23

24  
25 Helen I McDonald  
26

27  
28 Faculty of Epidemiology and Population Health, London School of Hygiene & Tropical  
29 Medicine, Keppel Street, London, UK WC1E 7HT. Tel: +44 (0)20 7636 8636 ext 2247. Fax:  
30  
31 N/A. E-mail: [helen.mcdonald@lshtm.ac.uk](mailto:helen.mcdonald@lshtm.ac.uk)  
32  
33  
34

35  
36 **Keywords:** Community-acquired infections, Chronic Renal Insufficiency, Systematic review,  
37 Risk factors.  
38  
39

40  
41  
42 **Word counts:**  
43

44  
45 Abstract: 248 words  
46

47  
48 Body: 3,346 words  
49  
50  
51  
52  
53  
54  
55  
56  
57  
58  
59  
60

**ABSTRACT:**

**Objectives:** A systematic review of the association of pre-dialysis chronic kidney disease (CKD) with the incidence of acute, community-acquired infections.

**Design:** We searched Medline, Embase and Cochrane databases (inception to 29/03/2012) for studies analysing the association of pre-dialysis kidney disease with the incidence of acute, community-acquired urinary tract infection (UTI), lower respiratory tract or central nervous system infections, or sepsis. Studies were required to include at least 30 participants with and without kidney disease.

**Setting & participants:** Community-based populations of adults in high income countries.

**Outcome measures:** Acute, community-acquired urinary tract infection (UTI), lower respiratory tract or central nervous system infections, or sepsis.

**Results:** We identified eleven eligible studies. Estimates from two studies lacked 95% confidence intervals and standard errors. The remaining nine studies yielded 12 independent effect estimates. Most studies identified only severe infections resulting in hospitalisation. Quality assessment revealed that probable misclassification of kidney disease status and poor adjustment for confounding were common. There was evidence from a few large high quality studies of a graded association between pre-dialysis CKD stage and hospitalisation for infection. One study found an interaction with age, with a declining effect of CKD on infection risk as age increased. There was evidence of between-studies heterogeneity (outcomes: UTI  $I^2=55.2\%$ ,  $p=0.135$ ; other infections  $I^2=98.0\%$ ,  $p<0.001$ ;) and thus meta-analysis was not performed.

1  
2  
3 **Conclusions:** Pre-dialysis kidney disease appears to be associated with increased risk of  
4  
5 severe infection. Whether pre-dialysis kidney disease increases the susceptibility to infections  
6  
7 and whether age modifies this association remains unclear.  
8  
9  
10  
11  
12  
13  
14  
15  
16  
17  
18  
19  
20  
21  
22  
23  
24  
25  
26  
27  
28  
29  
30  
31  
32  
33  
34  
35  
36  
37  
38  
39  
40  
41  
42  
43  
44  
45  
46  
47  
48  
49  
50  
51  
52  
53  
54  
55  
56  
57  
58  
59  
60

For peer review only

## ARTICLE SUMMARY

### Article focus:

- This review sought to assess systematically whether pre-dialysis chronic kidney disease (CKD) is a risk factor for the incidence of acute, community-acquired urinary tract infection (UTI), lower respiratory tract infection (LRTI) central nervous system (CNS) infection, or sepsis, among community-based adults in high income countries.
- Any increased risk of infection incidence at early stages of CKD would affect a large and growing number of patients. Awareness and quantification of this risk could have benefits for patient management, more effective vaccination strategies and healthcare planning.

### Key messages:

- We identified major gaps in the literature including: a scarcity of high-quality studies on this research topic; a lack of studies using less severe outcome measures than hospitalisation, to allow any association of CKD with susceptibility to infection to be distinguished from an association with severity of infection; and a lack of data on the relationship between proteinuria and infection incidence independently of glomerular filtration rate.
- All studies were consistent with a positive association between CKD and infection risk.

### Strengths and limitations of this study:

- This study used a sensitive search strategy, with a broad definition of kidney disease, for a thorough and inclusive search.

1  
2  
3  
4  
5  
6  
7  
8  
9  
10  
11  
12  
13  
14  
15  
16  
17  
18  
19  
20  
21  
22  
23  
24  
25  
26  
27  
28  
29  
30  
31  
32  
33  
34  
35  
36  
37  
38  
39  
40  
41  
42  
43  
44  
45  
46  
47  
48  
49  
50  
51  
52  
53  
54  
55  
56  
57  
58  
59  
60

- Between-study heterogeneity, and the low quality of many of the studies, limit interpretation of results of the studies currently available.

For peer review only

## INTRODUCTION

Chronic kidney disease (CKD) is common, and its prevalence is increasing.[1] Infection is a major cause of mortality in end-stage renal disease (ESRD) and hospitalisation at all stages of CKD. The second commonest cause of death among ESRD patients in the US is septicaemia, and patients with ESRD are at increased risk of death from infection compared to the general population.[2-4] Both ESRD and pre-dialysis patients with CKD in the US are at higher risk of hospitalisation for infection than the general population.[2, 5-6] Pre-dialysis CKD has been found to increase mortality among patients hospitalised with infections.[7]

Increased mortality and hospitalisation from infection could be driven by increased severity of infection, i.e. once an infection is present, the course of the associated illness is more severe, or increased incidence, i.e. CKD may make people more susceptible to develop an infection. Patients with CKD display impaired host immunity: reduced vaccination responsiveness is observed at all stages of CKD.[8]

Among ESRD patients, aspects of dialysis, such as vascular and peritoneal access for dialysis, may be a risk factor for infection incidence and severity. However, this does not tell the whole story, and only 23% of infection-related hospitalisations among haemodialysis patients in the US were identified as related to vascular access in the HEMO study.[9] Risk factors for infection identified among ESRD patients which are not related to renal replacement therapy, and could apply at all stages of pre-dialysis CKD, include: the causes and treatment of kidney disease; co-morbidities; reduced vaccine effectiveness; and high levels of exposure to health care facilities.[10]

If there is an increased risk of infection incidence at early stages of CKD, this would affect a large and growing number of patients. Awareness and quantification of this risk could have

1  
2  
3 benefits for patient management, more effective vaccination strategies and healthcare  
4  
5 planning.  
6  
7

8 Narrative reviews have concluded that it is likely that CKD in itself increases infection  
9  
10 incidence, but reported a lack of evidence.[10-12] We are not aware of any relevant  
11  
12 systematic literature reviews of the effect of CKD on infection incidence.  
13  
14

15  
16 This review sought to assess systematically whether pre-dialysis CKD is a risk factor for the  
17  
18 incidence of acute, community-acquired urinary tract infection (UTI), lower respiratory tract  
19  
20 infection (LRTI) central nervous system (CNS) infection, or sepsis, among community-based  
21  
22 adults in high income countries.  
23  
24  
25  
26  
27  
28  
29  
30  
31  
32  
33  
34  
35  
36  
37  
38  
39  
40  
41  
42  
43  
44  
45  
46  
47  
48  
49  
50  
51  
52  
53  
54  
55  
56  
57  
58  
59  
60



## METHODS

### Data Sources and Searches

One reviewer (HM) searched the Medline and Embase databases, and the Cochrane library, from inception to 29 March 2012. The search strategies combined text words and MeSH terms for three concepts: acute community-acquired infection (either sepsis, UTI, LRTI or CNS infection); kidney disease; and relative risk. We used search terms to identify studies among adult humans in high-income countries (according to the World Bank classification),[13] and limited the search to articles in English, French or German. The full strategies are available in **Supplementary Tables 1-3**.

We searched the reference lists of all included studies and any pertinent review articles to identify further eligible studies.

### Study Selection

One reviewer (HM) screened titles and abstracts, reviewed the full-text of identified studies and made initial decisions on eligibility according to pre-specified inclusion criteria (**Supplementary Table 4**). Any borderline cases were discussed between HM, DN and ST. A second reviewer (DN) checked a sample of 100 abstracts, selected randomly after de-duplication of records, and a kappa statistic was calculated to describe agreement in selection of studies.

Eligible studies analysed the effect of pre-dialysis kidney disease on the relative risk of at least one of the four specified acute, community-acquired infections among community-based adults in high-income countries. We excluded study populations routinely treated with

1  
2  
3 specialist medication in secondary care (unless these were for kidney disease) which often  
4  
5 has potential immunosuppressive effects, and study populations exclusively of pregnant  
6  
7 women, as both groups have a raised risk of infection, and the relationship of CKD to  
8  
9 infection risk may be different among these groups compared to that in the general adult  
10  
11 population.  
12

13  
14  
15 To maximise the sensitivity of our search strategy, we accepted a wide range of definitions of  
16  
17 kidney disease, including: medical diagnosis of kidney disease, reduced estimated  
18  
19 glomerular filtration rate, elevated creatinine or creatinine clearance, proteinuria, micro- or  
20  
21 macro-albuminuria, and renal structural abnormalities. We also accepted definitions which  
22  
23 included some patients with ESRD among the patients with CKD, but excluded definitions  
24  
25 which were exclusively patients receiving renal replacement therapy.  
26  
27

28  
29 Outcomes of interest were relative risk estimates of acute community-acquired LRTIs, UTIs,  
30  
31 CNS infections or sepsis. We accepted outcomes describing incidence of severe infections  
32  
33 (such as hospitalisation with pneumonia).  
34  
35

36  
37 We restricted our search to published studies which were sufficiently large to include at least  
38  
39 30 participants with and without kidney disease, to allow reasonable precision of the study  
40  
41 estimate. Detailed eligibility criteria are listed in **Supplementary Table 4**.  
42  
43

#### 44 45 **Data Extraction and Quality Assessment**

46  
47 Data were extracted from relevant studies using a pre-specified collection form. Study  
48  
49 characteristics extracted included study design, data source, any participant exclusion criteria,  
50  
51 number of participants, age, gender, baseline renal function, definition of renal impairment,  
52  
53 definition of the outcome infection. An estimate of relative risk (rate ratio, risk ratio or odds  
54  
55 ratio) with any measures taken to address confounding was extracted from each eligible  
56  
57  
58  
59  
60

1  
2  
3 independent analysis in each study. Studies with no confidence intervals and for which the  
4  
5 standard error was not calculable from the data presented were included in the review but not  
6  
7 considered for meta-analysis.  
8  
9

10  
11 When multiple estimates were available from a study but were not independent, a single  
12  
13 estimate was identified for potential meta-analysis by selecting the estimate best adjusted for  
14  
15 confounding, using the most recent data, comparing the level of CKD most common in the  
16  
17 general population with no CKD.  
18  
19

20  
21 Study quality was assessed using a pre-specified tool adapted from Higgins *et al.* for  
22  
23 observational studies.[14] Studies were assigned a high, low or uncertain risk of each of:  
24  
25 selection bias, non-differential measurement error for exposure and outcome, information  
26  
27 bias in exposure and outcome, confounding and reverse causation. The minimum requirement  
28  
29 for a low risk of bias from confounding was appropriate management of confounding by age,  
30  
31 sex and diabetes. Specific criteria used are detailed in **Supplementary Table 5**.  
32  
33

### 34 35 **Data Synthesis and Analysis**

36  
37  
38 The relationship between CKD and UTIs was considered likely to differ from that of CKD to  
39  
40 other infections, due to potential reverse causality. For example, repeat UTIs may cause  
41  
42 kidney disease, or structural kidney disease may be identified through investigation of repeat  
43  
44 UTIs. Therefore in all quantitative analysis, UTIs were analysed separately from other  
45  
46 infections.  
47  
48

49  
50 Estimates were examined for heterogeneity using Cochran's Q statistic and the  $I^2$  statistic as  
51  
52 described by Higgins *et al.*[15] If  $I^2$  was less than 50% and Cochran's Q statistic  $p \geq 0.1$ ,  
53  
54 fixed-effects meta-analysis was considered for each of the two categories (UTI, and other  
55  
56  
57  
58  
59  
60

1  
2  
3  
4  
5  
6  
7  
8  
9  
10  
11  
12  
13  
14  
15  
16  
17  
18  
19  
20  
21  
22  
23  
24  
25  
26  
27  
28  
29  
30  
31  
32  
33  
34  
35  
36  
37  
38  
39  
40  
41  
42  
43  
44  
45  
46  
47  
48  
49  
50  
51  
52  
53  
54  
55  
56  
57  
58  
59  
60

infections). Funnel plots were constructed to look for publication bias. All analysis was conducted using STATA version 12.0.

For peer review only

## RESULTS

The database searches identified 8,363 citations, of which 1,001 were duplicates (**Figure 1**).

Both reviewers had 100% agreement on which studies to extract for full-text analysis from screening a random sample of 100 abstracts (Cohen's  $K = 1$ ).

We identified 11 eligible studies, with varying study characteristics (**Table 1**). Three studies were case-control studies,[16-18] and eight were cohort studies.[5, 19-25] Five studies investigated a range of risk factors for infection,[16-18, 24-25] two studies reported the effect of CKD on infection as a confounder of the effect of interest,[20-21] and only four studies investigated the effect of CKD on infection risk as their primary research question.[5, 19, 22-23, 26]

Four studies were based among the general population.[5, 16, 24-25] Other study populations included: attendants at a specialist renal clinic,[19] patients with diabetes mellitus,[21] patients admitted to hospital for an acute cardiovascular event or an arterial revascularisation procedure, [20] and the Navajo Nation – a population which experiences 3–5 times higher rates of invasive pneumococcal disease than the general US population.[17] The population of the cohort studies in Calgary, Canada were adults with a serum creatinine test result available in their medical records.[22-23] There is some overlap in the study populations of these two cohort studies: residents aged over 65 years with a serum creatinine measurement between 1 July 2001 and 31 December 2001 and also between 1 July 2003 and 30 June 2004 would have been included in both studies for the period from the second creatinine measurement until 31 December 2004.[22-23]

Definitions of kidney disease included medical diagnoses of chronic renal disease, elevated creatinine levels, impaired creatinine clearance, and structural abnormalities of the kidney.

Four studies excluded patients with ESRD, and one specified the number included, but for the

1  
2  
3 remaining six studies it was unclear how many of the included patients received renal  
4  
5 replacement therapy.  
6

7  
8 Two studies recorded infections diagnosed in primary care,[16, 24] two recorded infections  
9 identified from a positive culture result,[17, 22] one included infections diagnosed in the  
10 emergency department,[18] five required hospital admission for infection,[5, 20-21, 23, 25]  
11 and for one study the definition and severity of infection was unclear.[19]  
12  
13  
14  
15

16  
17  
18 For two studies, the results extracted had no confidence interval or standard error and these  
19 could not be calculated from the reported data. From the remaining nine studies, 12  
20 independent effect estimates with standard errors were available for meta-analysis, among  
21 which UTI was the outcome in two estimates.  
22  
23  
24  
25

26  
27  
28 For infections other than UTIs, there was strong evidence of considerable heterogeneity  
29 (Cochran's Q statistic  $p < 0.001$ ,  $I^2 = 98.0\%$ ) and among the two studies of UTIs, there was  
30 some evidence of heterogeneity ( $p = 0.135$ ,  $I^2 = 55.2\%$ ). This remained after considering LRTIs  
31 alone ( $p < 0.001$ ,  $I^2 = 98.6\%$ ). For this reason, meta-analysis was not performed. There were  
32 only two studies excluding patients with ESRD for which standard errors were available, and  
33 so these estimates were not analysed separately.  
34  
35  
36  
37  
38  
39

40  
41  
42 The results available for quantitative analysis are displayed in the Forest plot (**Figure 2**).  
43  
44 Despite the quantitative heterogeneity, the results were qualitatively similar: all estimates  
45 were compatible with a positive association between kidney disease and infection. The four  
46 studies which compared different stages of CKD found a graded association of increased risk  
47 of infection with more severe CKD.[5, 19, 22-23] One study found that the effect of CKD on  
48 infection risk was modified by age, with a declining effect of CKD on infection risk as age  
49 increased.[23] This effect was consistent with the lower effect of CKD on UTI incidence  
50  
51  
52  
53  
54  
55  
56  
57  
58  
59  
60

1  
2  
3 found among 86–90 year olds (0.90, 95% CI 0.50–1.77) compared with an adult study  
4  
5 population with a mean age of 66 years (1.50, 95% CI 1.10–1.90).[21, 24]  
6  
7

8  
9 The funnel plot was sparsely populated, with widely scattered effect estimates, and provides  
10  
11 no clear evidence for or against publication bias (**Supplementary Figure 1**).  
12

13  
14 Study quality was variable. Relying on routine medical diagnosis introduced a potential  
15  
16 source of misclassification of kidney disease status for six studies.[5, 16-18, 20, 25] There  
17  
18 was variable adjustment for confounding, from unadjusted crude estimates to estimates  
19  
20 adjusted for a range of comorbidities, demographic and socio-economic factors. Four studies  
21  
22 did not meet this review's minimal requirements.[19, 21, 24-25] The summarised results are  
23  
24 displayed in **Table 2**, and the full quality assessment is in **Supplementary Table 5**.  
25  
26  
27  
28  
29  
30  
31  
32  
33  
34  
35  
36  
37  
38  
39  
40  
41  
42  
43  
44  
45  
46  
47  
48  
49  
50  
51  
52  
53  
54  
55  
56  
57  
58  
59  
60

Table 1: Characteristics of eligible studies (n=11)

| Case-control studies             |             |                                 |                                                                                                                       |                       |                                    |                                                                      |                               |                                                                                                                                   |                                                    |                           |                   |                                          |
|----------------------------------|-------------|---------------------------------|-----------------------------------------------------------------------------------------------------------------------|-----------------------|------------------------------------|----------------------------------------------------------------------|-------------------------------|-----------------------------------------------------------------------------------------------------------------------------------|----------------------------------------------------|---------------------------|-------------------|------------------------------------------|
|                                  | Study       |                                 |                                                                                                                       | Kidney disease        |                                    |                                                                      | Infection                     |                                                                                                                                   |                                                    | Kidney disease prevalence |                   | Odds ratio (95% CI)                      |
|                                  | Date        | Setting                         | Population<br>Age<br>% Female                                                                                         | Defined               | ESRD included                      | Ascertained                                                          | Type                          | Defined                                                                                                                           | Ascertained                                        | Cases                     | Controls          |                                          |
| Vinogradova 2009 <sup>[16]</sup> | 1996 - 2005 | UK                              | General population<br><br>Any age<br>Median age band 45-64 years<br><br>Cases 49.3%, controls 49.1%                   | Chronic renal disease | Unclear                            | Primary care medical record diagnosis code in previous 5 years       | Pneumonia                     | Medical diagnosis recorded in primary care records                                                                                | READ code in primary care medical records          | 203/17,172 (1.2%)         | 386/71,299 (0.5%) | 1.72 (1.3 – 2.07) <sup>1</sup>           |
| Watt 2007 <sup>[17]</sup>        | 1999 - 2002 | The Navajo Nation<br><br>USA    | Navajo adults<br><br>≥18 years<br><br>Summary age and sex n/r                                                         | Chronic renal failure | 17 participants receiving dialysis | Medical record abstraction                                           | Invasive pneumococcal disease | S.pneumoniae isolated from a normally sterile body fluid during illness                                                           | Active laboratory surveillance system <sup>2</sup> | 20/118 (16.9%)            | 12/353 (3.4%)     | 2.6 (0.87 – 7.7) <sup>3</sup><br>P=0.087 |
| Loeb 2009 <sup>[18]</sup>        | 2002 - 2005 | Ontario & Alberta<br><br>Canada | General population<br><br>≥ 65 years<br>Mean age: cases 79.1, controls 74.4 years.<br><br>Cases 39.6%, controls 68.5% | Renal disease         | Unclear                            | Cases: hospital interview.<br>Controls: telephone interview at home. | Pneumonia                     | Consistent chest X-ray and ≥2 of: chest pain, shortness of breath, productive cough, temperature >38°C, crackles on auscultation. | Recruited patients attending emergency departments | 127/690 (18.4%)           | 38/82 (4.4%)      | 4.06 (1.98–8.35)<br>P<0.001 <sup>4</sup> |



| Cohort studies                   |             |                                         |                                                                                                                                   |                                            |          |                                                                                |                                                          |                                       |                                                                                                          |                                      |                                              |                                          |
|----------------------------------|-------------|-----------------------------------------|-----------------------------------------------------------------------------------------------------------------------------------|--------------------------------------------|----------|--------------------------------------------------------------------------------|----------------------------------------------------------|---------------------------------------|----------------------------------------------------------------------------------------------------------|--------------------------------------|----------------------------------------------|------------------------------------------|
|                                  | Study       |                                         |                                                                                                                                   | Kidney disease                             |          |                                                                                | Comparison group                                         | Infection                             |                                                                                                          |                                      | Risk or rate ratio (95% CI)                  |                                          |
|                                  | Date        | Setting                                 | Population Number<br>Age<br>Sex                                                                                                   | Defined Number with kidney disease         | ESRD     | Ascertained                                                                    | Defined                                                  | Type                                  | Defined                                                                                                  | Ascertained                          |                                              |                                          |
| Higgins 1989 <sup>[19]</sup>     | 1985        | Oxford UK<br><br>1 year                 | Patients attending a Renal Unit with chronic renal failure<br><br>n=211<br><br>17-77 years<br>Mean 50.5 years<br><br>% female n/r | Creatinine ≥250 µmol/l<br><br>Number n/r   | Excluded | Serum creatinine                                                               | Creatinine <250 µmol/l<br><br>n/r                        | UTI                                   | >10 <sup>5</sup> organism/ml and ≥10 leucocytes /hpf in clean catch urine specimen                       | Medical record review                | Creatinine µmol/l                            |                                          |
|                                  |             |                                         |                                                                                                                                   |                                            |          |                                                                                |                                                          |                                       |                                                                                                          |                                      | <250                                         | 1                                        |
|                                  |             |                                         |                                                                                                                                   |                                            |          |                                                                                |                                                          |                                       |                                                                                                          |                                      | 250-500                                      | 1.5 <sup>5</sup>                         |
|                                  |             |                                         |                                                                                                                                   |                                            |          |                                                                                |                                                          |                                       |                                                                                                          |                                      | >500                                         | 2 <sup>5</sup>                           |
| Hackam 2006 <sup>[20]</sup>      | 1997 - 2002 | Ontario Canada<br><br>Mean 2.2 years    | Patients with cardiovascular disease<br><br>n=69,168<br><br>>65 years<br>Mean 74.1 years<br><br>44% female                        | Chronic renal insufficiency<br><br>n=7,169 | Unclear  | Health record databases <sup>6</sup>                                           | No chronic renal insufficiency                           | Sepsis                                | Hospital admission with a diagnosis of sepsis <sup>7</sup>                                               | Health record database <sup>8</sup>  | 1.47 (1.27–1.72) <sup>9</sup>                |                                          |
| Karunajeewa 2005 <sup>[21]</sup> | 1999 - 2000 | Western Australia<br><br>Mean 2.9 years | Patients with diabetes<br><br>n=496<br><br>>10 years<br>Mean 66.1 years <sup>10</sup>                                             | Albuminuria; serum urea; serum creatinine  | Unclear  | Baseline urinary albumin: creatinine ratio (ACR), serum urea, serum creatinine | Hazard ratio per 2.72-fold increase in ACR or serum urea | Urinary sepsis and non-urinary sepsis | Hospitalisation diagnosis codes (principal diagnosis, or principal or secondary diagnosis) <sup>11</sup> | Health record database <sup>12</sup> | Urinary sepsis (principal code)              |                                          |
|                                  |             |                                         |                                                                                                                                   |                                            |          |                                                                                |                                                          |                                       |                                                                                                          |                                      | Ln(ACR)                                      | 1.5 (1.1 – 1.9) <sup>13</sup><br>p=0.004 |
|                                  |             |                                         |                                                                                                                                   |                                            |          |                                                                                |                                                          |                                       |                                                                                                          |                                      | Urinary sepsis (principal or secondary code) |                                          |
|                                  |             |                                         |                                                                                                                                   |                                            |          |                                                                                |                                                          |                                       |                                                                                                          |                                      | Ln(ACR)                                      | 1.3 (1.1 – 1.6) <sup>14</sup><br>p=0.005 |
|                                  |             |                                         |                                                                                                                                   |                                            |          |                                                                                |                                                          |                                       |                                                                                                          |                                      | Non-urinary sepsis (principal)               |                                          |
|                                  |             |                                         |                                                                                                                                   |                                            |          |                                                                                |                                                          |                                       |                                                                                                          |                                      | Ln(ACR)                                      | 1.4(1.1-1.9) <sup>13</sup>               |

|                            |             |                |                                                                                                                |                                                                           |          |                                     |                                                            |                       |                                                                                                                       |                                     |                                                  |                                        |
|----------------------------|-------------|----------------|----------------------------------------------------------------------------------------------------------------|---------------------------------------------------------------------------|----------|-------------------------------------|------------------------------------------------------------|-----------------------|-----------------------------------------------------------------------------------------------------------------------|-------------------------------------|--------------------------------------------------|----------------------------------------|
|                            |             |                | 46.2% female                                                                                                   |                                                                           |          |                                     |                                                            |                       |                                                                                                                       |                                     | Non-urinary sepsis (principal or secondary code) |                                        |
|                            |             |                |                                                                                                                |                                                                           |          |                                     |                                                            |                       |                                                                                                                       |                                     | Ln(urea)                                         | 4.6 (2.3-9.4) <sup>13</sup><br>p<0.001 |
| James 2008 <sup>[22]</sup> | 2001 - 2004 | Calgary Canada | General population<br>n=25,675<br>Mean 3.2 years<br>>65 years<br>Mean by eGFR <sup>15</sup><br>55.9% female    | Baseline eGFR<60 mL/min/1.73 m <sup>2</sup> <sup>16</sup><br>n=6,941      | Excluded | Calgary Laboratory Services records | Baseline eGFR ≥60 mL/min/1.73 m <sup>2</sup> <sup>16</sup> | Bloodstream infection | Any pathogenic organism isolated from ≥1 blood cultures submitted from the community or ≤2 days of hospital admission | Calgary Laboratory Services records | eGFR mL/min/1.73m <sup>2</sup>                   |                                        |
|                            |             |                |                                                                                                                |                                                                           |          |                                     |                                                            |                       |                                                                                                                       |                                     | ≥60                                              | 1                                      |
|                            |             |                |                                                                                                                |                                                                           |          |                                     |                                                            |                       |                                                                                                                       |                                     | 45-59                                            | 1.17 (0.92-1.49) <sup>17</sup>         |
|                            |             |                |                                                                                                                |                                                                           |          |                                     |                                                            |                       |                                                                                                                       |                                     | 30-44                                            | 1.60 (1.20-2.13) <sup>17</sup>         |
|                            |             |                |                                                                                                                |                                                                           |          |                                     |                                                            |                       |                                                                                                                       |                                     | <30                                              | 2.95 (2.11-4.14) <sup>17</sup>         |
| James 2009 <sup>[23]</sup> | 2003 - 2006 | Calgary Canada | General population<br>n=252,516<br>Median 2.5 years<br>≥18 years<br>Mean by eGFR <sup>18</sup><br>42.3% female | Time updated eGFR<60 mL/min/1.73 m <sup>2</sup> <sup>19</sup><br>n=35,948 | Excluded | Calgary Laboratory Services records | eGFR 60-104 mL/min/1.73 m <sup>2</sup> <sup>19</sup>       | Pneumonia             | ICD-10 code for pneumonia any position in hospital discharge report                                                   | Hospital discharge reports          | eGFR mL/min/1.73m <sup>2</sup>                   |                                        |
|                            |             |                |                                                                                                                |                                                                           |          |                                     |                                                            |                       |                                                                                                                       |                                     | 18-54 years                                      |                                        |
|                            |             |                |                                                                                                                |                                                                           |          |                                     |                                                            |                       |                                                                                                                       |                                     | 60-104                                           | 1                                      |
|                            |             |                |                                                                                                                |                                                                           |          |                                     |                                                            |                       |                                                                                                                       |                                     | 45-59                                            | 3.23 (2.40-4.36) <sup>20</sup>         |
|                            |             |                |                                                                                                                |                                                                           |          |                                     |                                                            |                       |                                                                                                                       |                                     | 30-44                                            | 9.67 (6.36-14.69) <sup>20</sup>        |
|                            |             |                |                                                                                                                |                                                                           |          |                                     |                                                            |                       |                                                                                                                       |                                     | <30                                              | 15.04 (9.64-23.47) <sup>20</sup>       |
|                            |             |                |                                                                                                                |                                                                           |          |                                     |                                                            |                       |                                                                                                                       |                                     | Age 55 – 64 years                                |                                        |
|                            |             |                |                                                                                                                |                                                                           |          |                                     |                                                            |                       |                                                                                                                       |                                     | 60-104                                           | 1                                      |
|                            |             |                |                                                                                                                |                                                                           |          |                                     |                                                            |                       |                                                                                                                       |                                     | 45-59                                            | 1.43 (1.11-1.84) <sup>20</sup>         |
|                            |             |                |                                                                                                                |                                                                           |          |                                     |                                                            |                       |                                                                                                                       |                                     | 30-44                                            | 1.94 (1.32-2.87) <sup>20</sup>         |
|                            |             |                |                                                                                                                |                                                                           |          |                                     |                                                            |                       |                                                                                                                       |                                     | <30                                              | 5.50 (3.83-7.92) <sup>20</sup>         |
|                            |             |                |                                                                                                                |                                                                           |          |                                     |                                                            |                       |                                                                                                                       |                                     | Age 65 – 74 years                                |                                        |
|                            |             |                |                                                                                                                |                                                                           |          |                                     |                                                            |                       |                                                                                                                       |                                     | 60-104                                           | 1                                      |
|                            |             |                |                                                                                                                |                                                                           |          |                                     |                                                            |                       |                                                                                                                       |                                     | 45-59                                            | 1.18 (0.99-1.40) <sup>20</sup>         |
|                            |             |                |                                                                                                                |                                                                           |          |                                     |                                                            |                       |                                                                                                                       |                                     | 30-44                                            | 2.24 (1.84-2.73) <sup>20</sup>         |
|                            |             |                |                                                                                                                |                                                                           |          |                                     |                                                            |                       |                                                                                                                       |                                     | <30                                              | 3.23 (2.52-4.13) <sup>20</sup>         |
|                            |             |                |                                                                                                                |                                                                           |          |                                     |                                                            |                       |                                                                                                                       |                                     | Age ≥75 years                                    |                                        |
|                            |             |                |                                                                                                                |                                                                           |          |                                     |                                                            |                       |                                                                                                                       |                                     | 60-104                                           | 1                                      |
|                            |             |                |                                                                                                                |                                                                           |          |                                     |                                                            |                       |                                                                                                                       |                                     | 45-59                                            | 0.95 (0.85-1.05) <sup>20</sup>         |
|                            |             |                |                                                                                                                |                                                                           |          |                                     |                                                            |                       |                                                                                                                       |                                     | 30-44                                            | 1.03 (0.92-1.16) <sup>20</sup>         |
|                            |             |                |                                                                                                                |                                                                           |          |                                     |                                                            |                       |                                                                                                                       |                                     | <30                                              | 1.79 (1.55-2.06) <sup>20</sup>         |

|                               |             |                                          |                                                                                           |                                                      |          |                                                                                                          |                                              |                            |                                                                                                             |                                                                                                   |                              |                   |
|-------------------------------|-------------|------------------------------------------|-------------------------------------------------------------------------------------------|------------------------------------------------------|----------|----------------------------------------------------------------------------------------------------------|----------------------------------------------|----------------------------|-------------------------------------------------------------------------------------------------------------|---------------------------------------------------------------------------------------------------|------------------------------|-------------------|
| Caljouw 2011 <sup>[24]</sup>  | 1998 - 2004 | Leiden The Netherlands<br>Mean 2.6 years | General population<br>n= 479<br>86-90 years<br>All aged 86 years at entry<br>67.2% female | Creatinine clearance <30mL/min <sup>21</sup><br>n=43 | Unclear  | Baseline serum creatinine                                                                                | Creatinine clearance ≥30mL/min <sup>21</sup> | UTI                        | Diagnosed by treating physician based on signs, symptoms and urine analysis; or death records <sup>22</sup> | Physician interview and medical record review.<br>Statistics Netherlands for cause of death data. | 0.9 (0.5–1.7)<br>p=0.794     |                   |
| Campbell 2011 <sup>[25]</sup> | 2009 - 2010 | England UK<br>9 months                   | General population<br>n=43.9 million<br>6 months - 64 years<br>Summary age and sex n/r    | Chronic kidney disease<br>n=182,000                  | Unclear  | Cases: consultant microbiologist report.<br>Denominator: primary care population estimate. <sup>23</sup> | No pre-existing conditions <sup>23</sup>     | Pandemic influenza A(H1N1) | Polymerase chain reaction (PCR) test confirmation of pandemic influenza A (H1N1) from a hospital inpatient. | Consultant microbiologist report to national surveillance system.                                 | 17.5 (13.4 – 22.9)           |                   |
| USRDS 2010 <sup>[26]</sup>    | 2008        | USA<br>1 year <sup>24</sup>              | Medicare patients 66+ years                                                               | Chronic kidney disease                               | Excluded | Insurance database ICD-9_CM codes <sup>25</sup>                                                          | No CKD                                       | Pneumonia                  | Principal cause of hospital admission using hospital insurance claim records                                | ICD-9-CM codes 480-486                                                                            | 2.76 (unadjusted)            |                   |
|                               |             |                                          |                                                                                           |                                                      |          |                                                                                                          |                                              | UTI                        |                                                                                                             |                                                                                                   | ICD-9-CM codes <sup>26</sup> | 3.15 (unadjusted) |
|                               |             |                                          |                                                                                           |                                                      |          |                                                                                                          |                                              | Bacteraemia/septicaemia    |                                                                                                             |                                                                                                   | ICD-9-CM codes 038.0 – 038.9 | 3.90 (unadjusted) |
| USRDS 2012 <sup>[5]</sup>     | 2010        | USA<br>1 year <sup>24</sup>              | Medicare 66+ years                                                                        | Chronic kidney disease                               | Excluded | Insurance database ICD-9_CM codes <sup>25</sup>                                                          | No CKD                                       | All infection              | Principal cause of hospital admission using hospital insurance claim records                                | ICD-9-CM codes <sup>27</sup>                                                                      | 1.46 <sup>28</sup>           |                   |
|                               |             |                                          | MarketScan 50-64 years                                                                    |                                                      |          |                                                                                                          |                                              |                            |                                                                                                             |                                                                                                   | 1.40 <sup>28</sup>           |                   |
|                               |             |                                          | Ingenix i3 50-64 years                                                                    |                                                      |          |                                                                                                          |                                              |                            |                                                                                                             |                                                                                                   | 1.42 <sup>28</sup>           |                   |

95% CI = 95% confidence interval; n/r = not reported; CKD= chronic kidney disease; UTI = urinary tract infection

1. Controls matched to cases on age at index data (within 1 year), sex, general practice, and calendar time. Estimate adjusted for smoking status, Townsend deprivation score, use of influenza vaccine in previous 12 months, use of pneumococcal vaccine in previous 5 years, number of years of medical records data available in database, and

- 1
- 2 comorbidities including: diabetes, chronic heart disease, chronic respiratory disease, asplenia, cerebrospinal shunt, chronic liver disease, sickle cell disease or coeliac disease,
- 3 cochlear implant, HIV/AIDS, immunosuppression, stroke or transient ischaemic attack, rheumatoid arthritis, Parkinson's disease, multiple sclerosis, dementia, osteoporosis,
- 4 and any cancer.
- 5
- 6 2. Center for American Indian Health surveillance system.
- 7 3. Cases and controls matched by gender and age group. Adjusted for age, receipt of pneumococcal polysaccharide vaccine, congestive heart failure, alcohol use, body mass
- 8 index and unemployment.
- 9
- 10 4. Adjusted for age, non-English language spoken most at home, living in detached house, living alone, congestive heart failure, chronic obstructive pulmonary disease,
- 11 dysphagia, functional status using Barthel Index, immunosuppressive medications, nutritional score, tobacco use (lifetime history and secondhand smoke), alcohol
- 12 consumption and history of regular exposure to gases, fumes or chemicals at home, or at work.
- 13
- 14 5. Approximate numbers, read from bar graph in publication. No confidence intervals available.
- 15
- 16 6. Canadian Institute for Health Information Discharge Abstract database or Ontario Health Insurance Plan database
- 17
- 18 7. ICD-9 codes 003 1, 036 2 and 038 0 – 038 9.
- 19
- 20 8. Canadian Institute for Health Information Discharge Abstract database.
- 21
- 22 9. Adjusted for statins, age, sex, nature of index event, charlson index, healthcare use, malignant disease, chemotherapy, neutropaenia, diabetes mellitus, oral steroids,
- 23 antineoplastics, other immunosuppressants, history of aspiration, structural lung disease, previous infection (respiratory, GI, skin/soft tissue or other), recent trauma, transplant
- 24 recipient, heart failure, stroke, chronic liver disease, chronic obstructive pulmonary disease, alcoholism, dementia, Parkinson's disease. Statin and non-statin users matched
- 25 using propensity scoring for the above factors.
- 26
- 27 10. Mean age among the 460 participants without asymptomatic bacteriuria, 66.1years (SD11.0): mean age among the 36 participants with asymptomatic bacteriuria, 67.7
- 28 years (SD 10.5).
- 29
- 30 11. ICD-9 or ICD-10 codes for urinary sepsis were those encoding UTI, cystitis, pyelonephritis, orchitis, epididymitis and prostatitis; codes for non-urinary sepsis were those
- 31 for sepsis, septicaemia and/or abscess.
- 32
- 33 12. Western Australia Data Linkage System.
- 34
- 35 13. Adjusted for presence of asymptomatic bacteriuria.
- 36
- 37 14. Adjusted for presence of asymptomatic bacteriuria and age.
- 38
- 39 15. Mean age  $\pm$ SD by eGFR.  $\geq$ 60: 74.4 $\pm$ 6.5years. 45-59: 77.5 $\pm$ 7.2 years. 30-44: 79.3 $\pm$ 7.4years. <30: 78.6 $\pm$ 7.4 years.
- 40
- 41 16. eGFR calculated using abbreviated Modification of Diet in Renal Disease Study equation (omitting ethnicity) from single outpatient serum creatinine result.
- 42
- 43 17. Adjusted for age, sex, diabetes mellitus, comorbidity score and care in a CKD clinic.
- 44
- 45 18. Mean age  $\pm$ SD by eGFR.  $\geq$ 105: 38.7 $\pm$ 14.6. 60-104: 50.9 $\pm$ 15.4. 45-59: 67.0 $\pm$  14.1. 30-44: 74.5 $\pm$ 12.9. <30: 73.3 $\pm$ 15.2.
- 46
- 47 19. eGFR calculated using abbreviated Modification of Diet in Renal Disease Study equation (omitting ethnicity) from most recent outpatient serum creatinine result.
- 48
- 49 20. Adjusted for age, sex, socio-economic status, ethnicity, diabetes mellitus, Charlson comorbidity score.
21. Creatinine clearance calculated from serum creatinine concentration and weight using Cockcroft-Gault formula.
22. Cause of death recorded as UTI (ICD-10 code N39.0)/
23. Department of Health-Health Protection Agency influenza vaccine uptake primary care monitoring system data.
24. Smoothed estimate: Models include data from the stated year and the two years proceeding it, applying weights of 1, ¼ and 1/8 with increasing distance in time.

- 1  
2 25. ICD-9-CM diagnosis codes recorded in insurance claims during the preceding year: 585.1 – 585.5 (chronic kidney disease stages 1-5); or 585.6 with no ESRD 2728 form  
3 or other indication of ESRD.  
4  
5 26. Principal hospital admission ICD-9-CM codes: 590-590.9, 595-595.4, 597-597.89, 598, 599.0, 601-601.9, 604-604.9, 607.1-2, 608.0, 608.4, 616.1, 616.3-4, and 616.8.  
6 27. Principal hospital admission ICD-9-CM codes: 001–139, 254.1, 320–326, 331.81, 372–372.39, 373.0–373.2, 382–382.4, 383.0, 386.33, 386.35, 388.60, 390–393, 421–  
7 421.1, 422.0, 422.91–422.93, 460–466, 472–474.0, 475–476.1, 478.21–478.24, 478.29, 480–490, 491.1, 494, 510–511, 513.0, 518.6, 519.01, 522.5, 522.7, 527.3, 528.3, 540–  
8 542, 566–567.9, 569.5, 572–572.1, 573.1–573.3, 575–575.12, 590–590.9, 595–595.4, 597–597.89, 598, 599.0, 601–601.9, 604–604.9, 607.1, 607.2, 608.0, 608.4, 611.0, 614–  
9 616.1, 616.3–616.4, 616.8, 670, 680–686.9, 706.0, 711–711.9, 730–730.3, 730.8–730.9, 790.7–790.8, 996.60–996.69, 997.62, 998.5, and 999.3.  
10 28. Rate ratios calculated as the ratio of the rate among participants with CKD, compared with no CKD, each rate having been adjusted for gender, prior hospitalisation,  
11 ASHD, CHF, CVA, PVD, dysrhythmia, other cardiac disease, diabetes, COPD, hypertension, liver disease, gastrointestinal disease, cancer, and anemia.  
12  
13  
14  
15  
16  
17  
18  
19  
20  
21  
22  
23  
24  
25  
26  
27  
28  
29  
30  
31  
32  
33  
34  
35  
36  
37  
38  
39  
40  
41  
42  
43  
44  
45  
46  
47  
48  
49

**Table 2: Summary of risk of bias within studies (quality assessment tool adapted from Higgins *et al.*)[14]**

|                                  | Selection bias:<br>control selection | Selection bias:<br>participation | Selection bias:<br>loss to follow up | Non-differential<br>misclassification:<br>Exposure | Information bias:<br>Exposure | Non-differential<br>misclassification:<br>Outcome | Information bias:<br>Outcome | Confounding | Reverse causation |
|----------------------------------|--------------------------------------|----------------------------------|--------------------------------------|----------------------------------------------------|-------------------------------|---------------------------------------------------|------------------------------|-------------|-------------------|
| <b>Case-control studies</b>      |                                      |                                  |                                      |                                                    |                               |                                                   |                              |             |                   |
| Vinogradova 2009 <sup>[16]</sup> |                                      |                                  | N/A                                  |                                                    |                               |                                                   |                              |             |                   |
| Watt 2007 <sup>[17]</sup>        |                                      |                                  | N/A                                  |                                                    |                               |                                                   |                              |             |                   |
| Loeb 2009 <sup>[18]</sup>        |                                      |                                  | N/A                                  |                                                    |                               |                                                   |                              |             |                   |
| <b>Cohort studies</b>            |                                      |                                  |                                      |                                                    |                               |                                                   |                              |             |                   |
| Higgins 1989 <sup>[19]</sup>     | N/A                                  | N/A                              |                                      |                                                    |                               |                                                   |                              |             |                   |
| Hackam 2006 <sup>[20]</sup>      | N/A                                  | N/A                              |                                      |                                                    |                               |                                                   |                              |             |                   |
| Karunajeewa 2005 <sup>[21]</sup> | N/A                                  | N/A                              |                                      |                                                    |                               |                                                   |                              |             |                   |
| James 2008 <sup>[22]</sup>       | N/A                                  | N/A                              |                                      |                                                    |                               |                                                   |                              |             |                   |
| James 2009 <sup>[23]</sup>       | N/A                                  | N/A                              |                                      |                                                    |                               |                                                   |                              |             |                   |
| Caljouw 2011 <sup>[24]</sup>     | N/A                                  | N/A                              |                                      |                                                    |                               |                                                   |                              |             |                   |
| Campbell 2011 <sup>[25]</sup>    | N/A                                  | N/A                              |                                      |                                                    |                               |                                                   |                              |             |                   |
| USRDS 2010 <sup>[26]</sup>       | N/A                                  | N/A                              |                                      |                                                    |                               |                                                   |                              |             |                   |
| USRDS 2012 <sup>[5]</sup>        | N/A                                  | N/A                              |                                      |                                                    |                               |                                                   |                              |             |                   |

**Key to table 2**

Low risk of bias

Uncertain risk of bias

High risk of bias

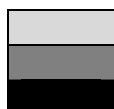

## DISCUSSION

Our comprehensive search strategy identified 11 studies describing an association between kidney disease and acute community-acquired infection. Although between-study heterogeneity precluded meta-analysis, all were consistent with a positive direction of association. The four studies which reported estimates on more than one category of kidney disease all found a graded association in which risk of infection increased with greater severity of CKD.[5, 19, 22-23]

To our knowledge, this is the first review to address this research question systematically. We used a sensitive search strategy, with a broad definition of kidney disease, for a thorough and inclusive search. The results are consistent with the conclusion of previous narrative reviews: that an association between CKD and infection incidence is likely, but that there is a paucity of evidence.[10-12]

Since our literature search, a subsequently published US prospective cohort study of 5,142 adults over 65 years old found an association between worse kidney function and higher risk of hospitalisation for infection.[27] Identification of CKD status was proactive and based on baseline blood measurements. The association was linear when kidney function was calculated using serum cystatin C, and U-shaped when kidney function was calculated using serum creatinine.

Heterogeneity between the studies precluded meta-analysis of results. Variable study designs and biases may have contributed to heterogeneity: for example, the three case-control studies calculated odds ratios, which may differ from equivalent rate ratios for common infections.[16-18] Failure to control the confounding effects of age, sex and diabetes would be likely to result in overestimation of the effect of CKD on infection. Non-differential

1  
2  
3 misclassification of kidney disease status in studies which relied on routine medical diagnosis  
4  
5 would be expected to underestimate the effect of CKD on infection risk.  
6  
7

8 The heterogeneity may reflect true differences in effect size between the studies.  
9

10  
11 Firstly, the studies considered a range of outcomes. CKD may have a different effect on the  
12 incidence of different infections. We analysed the effect of CKD on UTIs separately. For all  
13 but three studies, detection of infection required either hospital attendance for the infection or  
14 a positive blood culture. CKD may affect severity of infection, as an alternative or in  
15 addition to any effect on infection incidence. CKD may also increase the probability of  
16 hospital admission for management of a moderately severe infection. Either would result in a  
17 larger effect of CKD on the risk of severe infectious outcomes (such as hospitalisation for  
18 sepsis) than on less severe infections (such as community-diagnosed LRTI), and could result  
19 in the graded association we observed, with increasing hospitalisation for patients with more  
20 severe stages of CKD.  
21  
22  
23  
24  
25  
26  
27  
28  
29  
30  
31  
32

33  
34 Secondly, the studies included a variety of definitions of kidney disease. For example,  
35 proteinuria (and renal loss of complement) may represent a separate mechanism for risk of  
36 infection than uraemia. For the seven studies which did not exclude patients with ESRD it is  
37 unclear to what extent the results reflect the effect of treatments associated with dialysis, such  
38 as vascular or peritoneal access for dialysis, on infection incidence.  
39  
40  
41  
42  
43  
44  
45

46 Thirdly, the association of CKD with infection may be modified by age. James *et al.*  
47 observed a weaker association of CKD with hospitalisation for pneumonia as age increased.  
48 They suggested that such an observation could be explained by a lower baseline rate of  
49 hospitalisation for pneumonia among younger adults, the natural decline in renal function by  
50 age, and inaccuracy in the estimation of renal function using the Modification of Diet in  
51 Renal Disease (MDRD) Study equation in older populations.[23] As their study population  
52  
53  
54  
55  
56  
57  
58  
59  
60



1  
2  
3 included only adults who had had a creatinine test result, reasons for testing creatinine could  
4  
5 also be relevant confounders. As age-increases, more comorbidities accrue which require  
6  
7 creatinine tests to guide therapy. Hence, younger people who receive a creatinine test may be  
8  
9 at an unusually high risk for both infections and CKD due to the reasons associated with  
10  
11 getting a creatinine test. A real age-dependency of the CKD-infection association would be  
12  
13 consistent with the lower effect of CKD on UTI incidence found among 86–90 year olds  
14  
15 (0.90, 95% CI 0.50–1.77) compared with an adult study population with a mean age of 66  
16  
17 years (1.50, 95% CI 1.10–1.90). However, it may be that the study among the older adults  
18  
19 measured a less severe outcome, and CKD may be associated with other factors that  
20  
21 eventually lead to hospitalisation for UTI.[21, 24]  
22  
23  
24

25  
26 CKD was not a component of the primary study question for 7 of the 11 studies, thus there is  
27  
28 a risk that this association may have been reported and published only when CKD was found  
29  
30 to be a risk factor for infection or an important confounder of another relationship. This  
31  
32 would result in selective reporting bias, with a subsequent overestimation of the association  
33  
34 of CKD with infection risk. This bias would be expected to affect smaller studies to a greater  
35  
36 extent, and a funnel plot might show an asymmetry of relative risk estimates about the central  
37  
38 pooled estimate among smaller studies. The sparsely populated funnel plot (**Fig S1**) provides  
39  
40 no clear evidence for or against selective reporting bias, but some evidence of selective  
41  
42 reporting bias comes from within the individual studies. For example, the crude hazard ratio  
43  
44 for the association of creatinine clearance with UTI incidence is reported in Caljouw *et al.*  
45  
46 (0.9, 95% CI 0.5–1.7) but as creatinine clearance was not found to be significant in the  
47  
48 multivariable model the adjusted association is not reported.[24]  
49  
50  
51

52  
53 The overlap in the study populations of the two large cohort studies based in Calgary, Canada  
54  
55 could result in more similar estimates than if the study populations were independent.[22-23]  
56  
57  
58  
59  
60

1  
2  
3 Outcomes in the two studies are likely to be correlated with each other: hospitalisation with  
4 pneumonia could cause a positive blood culture, which would result in one infection being  
5 included as an outcome in both studies. This is unlikely to have a large effect, particularly in  
6 qualitative assessment of the combined evidence, as the potential overlap of person-time is  
7 limited.  
8  
9

10  
11  
12  
13  
14  
15 Although we excluded study populations routinely treated with specialist medication (unless  
16 for kidney disease), some study populations may have been at higher risk of infection than  
17 the general population, and this may have affected the relationship of CKD to infection. For  
18 example, the cohort of patients admitted for an acute cardiovascular event or an arterial  
19 revascularisation procedure will have had a higher prevalence of co-morbidities (such as  
20 diabetes) than the general population and excluded patients with severe co-morbidities who  
21 did not survive an acute cardiovascular event, or who were not fit enough to undergo the  
22 procedure.[20] Each of the selected study populations limits the generalisability of the  
23 individual study result, but the qualitatively similar findings across the variety of study  
24 populations, and their qualitative consistency with the four studies based among the general  
25 population,[5, 16, 24-25] support a positive association between CKD and infection risk in a  
26 variety of study populations.  
27  
28  
29  
30  
31  
32  
33  
34  
35  
36  
37  
38  
39  
40  
41

42 A few large, high quality studies have found a graded association between CKD and risk of  
43 hospitalisation with infection. All studies identified in this review were compatible with a  
44 positive association of CKD with increased infection risk. There are little data available on  
45 the association of CKD with infection incidence using less severe outcome measures than  
46 hospitalisation, and it is not possible in most studies to distinguish an effect on susceptibility  
47 to infection from an effect on the severity of infection.  
48  
49  
50  
51  
52  
53  
54  
55  
56  
57  
58  
59  
60

1  
2  
3 The potential age-dependency of the relationship between CKD and infection is intriguing  
4  
5 and needs further research. There is also currently no evidence on the relationship between  
6  
7 proteinuria and infection incidence independently of glomerular filtration rate. Future studies  
8  
9 should identify infections in the community in addition to hospitalisations for infection,  
10  
11 characterise the association of proteinuria adjusted for glomerular filtration rate, explore the  
12  
13 age-dependency of the association, and assess vaccine efficacy among older people with  
14  
15 CKD.  
16  
17  
18  
19  
20  
21  
22  
23  
24  
25  
26  
27  
28  
29  
30  
31  
32  
33  
34  
35  
36  
37  
38  
39  
40  
41  
42  
43  
44  
45  
46  
47  
48  
49  
50  
51  
52  
53  
54  
55  
56  
57  
58  
59  
60

## REFERENCES

1. Coresh J, Selvin E, Stevens LA, et al. Prevalence of chronic kidney disease in the United States. *JAMA*. 2007 Nov 7;298(17):2038-47.
2. Collins AJ, Foley R, Herzog C, et al. United States Renal Data System 2007 Annual Data Report Abstract. *Am J Kidney Dis*. 2008;51(1):A6-A7.
3. Sarnak MJ, Jaber BL. Mortality caused by sepsis in patients with end-stage renal disease compared with the general population. *Kidney Int*. 2000 Oct;58(4):1758-64.
4. Sarnak MJ, Jaber BL. Pulmonary infectious mortality among patients with end-stage renal disease. *Chest*. 2001 Dec;120(6):1883-7.
5. Morbidity and Mortality in Patients With Chronic Kidney Disease. *Am J Kidney Dis*. 2012;59(1):e59-e68.
6. Naqvi SB, Collins AJ. Infectious complications in chronic kidney disease. *Adv Chronic Kidney Dis*. 2006 Jul;13(3):199-204.
7. Viasus D, Garcia-Vidal C, Cruzado JM, et al. Epidemiology, clinical features and outcomes of pneumonia in patients with chronic kidney disease. *Nephrol Dial Transplant*. 2011 Sep;26(9):2899-906.
8. Kausz AT, Gilbertson DT. Overview of vaccination in chronic kidney disease. *Adv Chronic Kidney Dis*. 2006 Jul;13(3):209-14.
9. Allon M, Depner TA, Radeva M, et al. Impact of dialysis dose and membrane on infection-related hospitalization and death: results of the HEMO Study. *J Am Soc Nephrol*. 2003 Jul;14(7):1863-70.
10. Dalrymple LS, Go AS. Epidemiology of acute infections among patients with chronic kidney disease. *Clin J Am Soc Nephrol*. 2008 Sep;3(5):1487-93.
11. Foley RN. Infections in patients with chronic kidney disease. *Infect Dis Clin North Am*. 2007 Sep;21(3):659-72, viii.

- 1  
2  
3 12. Foley RN. Infections and cardiovascular disease in patients with chronic kidney disease. *Adv*  
4  
5 *Chronic Kidney Dis*. 2006 Jul;13(3):205-8.  
6  
7 13. The World Bank. Country and lending groups. 2012 [6 June 2013]; Available from:  
8  
9 <http://data.worldbank.org/about/country-classifications/country-and-lending-groups>.  
10  
11 14. Higgins JP, Altman DG, Gotzsche PC, et al. The Cochrane Collaboration's tool for assessing  
12 risk of bias in randomised trials. *BMJ*. 2011;343:d5928.  
13  
14 15. Higgins JP, Thompson SG, Deeks JJ, et al. Measuring inconsistency in meta-analyses. *BMJ*.  
15 2003 Sep 6;327(7414):557-60.  
16  
17 16. Vinogradova Y, Hippisley-Cox J, Coupland C. Identification of new risk factors for pneumonia:  
18 population-based case-control study. *Br J Gen Pract*. 2009 Oct;59(567):e329-38.  
19  
20 17. Watt JP, O'Brien KL, Benin AL, et al. Risk factors for invasive pneumococcal disease among  
21 Navajo adults. *Am J Epidemiol*. 2007 Nov 1;166(9):1080-7.  
22  
23 18. Loeb M, Neupane B, Walter SD, et al. Environmental risk factors for community-acquired  
24 pneumonia hospitalization in older adults. *Journal of the American Geriatrics Society*. 2009  
25 Jun;57(6):1036-40.  
26  
27 19. Higgins RM. Infections in a renal unit. *Q J Med*. 1989 Jan;70(261):41-51.  
28  
29 20. Hackam DG, Mamdani M, Li P, et al. Statins and sepsis in patients with cardiovascular  
30 disease: a population-based cohort analysis. *Lancet*. 2006 Feb 4;367(9508):413-8.  
31  
32 21. Karunajeewa H, McGeachie D, Stuccio G, et al. Asymptomatic bacteriuria as a predictor of  
33 subsequent hospitalisation with urinary tract infection in diabetic adults: The Fremantle Diabetes  
34 Study. *Diabetologia*. 2005 Jul;48(7):1288-91.  
35  
36 22. James MT, Laupland KB, Tonelli M, et al. Risk of bloodstream infection in patients with  
37 chronic kidney disease not treated with dialysis. *Arch Intern Med*. 2008 Nov 24;168(21):2333-9.  
38  
39 23. James MT, Quan H, Tonelli M, et al. CKD and risk of hospitalization and death with  
40 pneumonia. *Am J Kidney Dis*. 2009 Jul;54(1):24-32.  
41  
42  
43  
44  
45  
46  
47  
48  
49  
50  
51  
52  
53  
54  
55  
56  
57  
58  
59  
60

- 1  
2  
3 24. Caljouw MA, den Elzen WP, Cools HJ, et al. Predictive factors of urinary tract infections  
4 among the oldest old in the general population. A population-based prospective follow-up study.  
5 *BMC Med.* 2011;9:57.  
6  
7  
8  
9 25. Campbell CNJ, Mytton OT, McLean EM, et al. Hospitalization in two waves of pandemic  
10 influenza A(H1N1) in England. *Epidemiology & Infection.* 2011 Oct;139(10):1560-9.  
11  
12  
13 26. McFarlane SI, McCullough PA, Sowers JR, et al. Comparison of the CKD Epidemiology  
14 Collaboration (CKD-EPI) and Modification of Diet in Renal Disease (MDRD) study equations:  
15 prevalence of and risk factors for diabetes mellitus in CKD in the Kidney Early Evaluation Program  
16 (KEEP). *Am J Kidney Dis.* 2011 Mar;57(3 Suppl 2):S24-31.  
17  
18  
19  
20  
21  
22 27. Dalrymple LS, Katz R, Kestenbaum B, et al. The risk of infection-related hospitalization with  
23 decreased kidney function. *Am J Kidney Dis.* 2012 Mar;59(3):356-63.  
24  
25  
26  
27  
28  
29  
30  
31  
32  
33  
34  
35  
36  
37  
38  
39  
40  
41  
42  
43  
44  
45  
46  
47  
48  
49  
50  
51  
52  
53  
54  
55  
56  
57  
58  
59  
60

**FIGURE LEGENDS****Figure 1: Flow chart of study selection****Figure 2: Forest plot of estimates of the association of CKD with infection(n=12) from the nine studies included in quantitative analysis**

LRTI: lower respiratory tract infection

UTI: urinary tract infection

\* Outcome selected was urinary sepsis as the principal diagnosis for the hospitalisation

\*\* Estimated glomerular filtration rate (eGFR) 45-59 compared with eGFR $\geq$ 60 mL/min/1.73m<sup>2</sup>\*\*\* eGFR 45-59 compared with eGFR 60-104 mL/min/1.73m<sup>2</sup>

**Contributor statement:**

All authors designed the study strategy including the search terms, inclusion and exclusion criteria. HM performed the search, study selection and data extraction. DN screened the randomly selected sample of 100 abstracts. All authors agreed quality assessment of included papers and interpretation of results by discussion. HM drafted the article, which DN and ST revised. All authors approved the final version of the manuscript.

**Competing interests statement:**

H I McDonald: None. S L Thomas: None. D Nitsch: None to declare.

**Funding statement:** This report is independent research arising from a Career Development Fellowship supported by the National Institute for Health Research, awarded to Dr Thomas (grant number CDF 2010-03-32). HM is funded by a Kidney Research UK studentship, grant reference ST2/2011. The views expressed in this publication are those of the authors and not necessarily those of the UK National Health Service, the National Institute for Health Research, the Department of Health, or Kidney Research UK. The funders of the study had no role in the study design, data collection, analysis or interpretation, decision to publish, or preparation of the manuscript.

**Data sharing statement:**

All data, including full search terms and eligibility criteria, are available either in the article or as online supplementary material submitted with this manuscript.



Figure 1: Flow chart of study selection

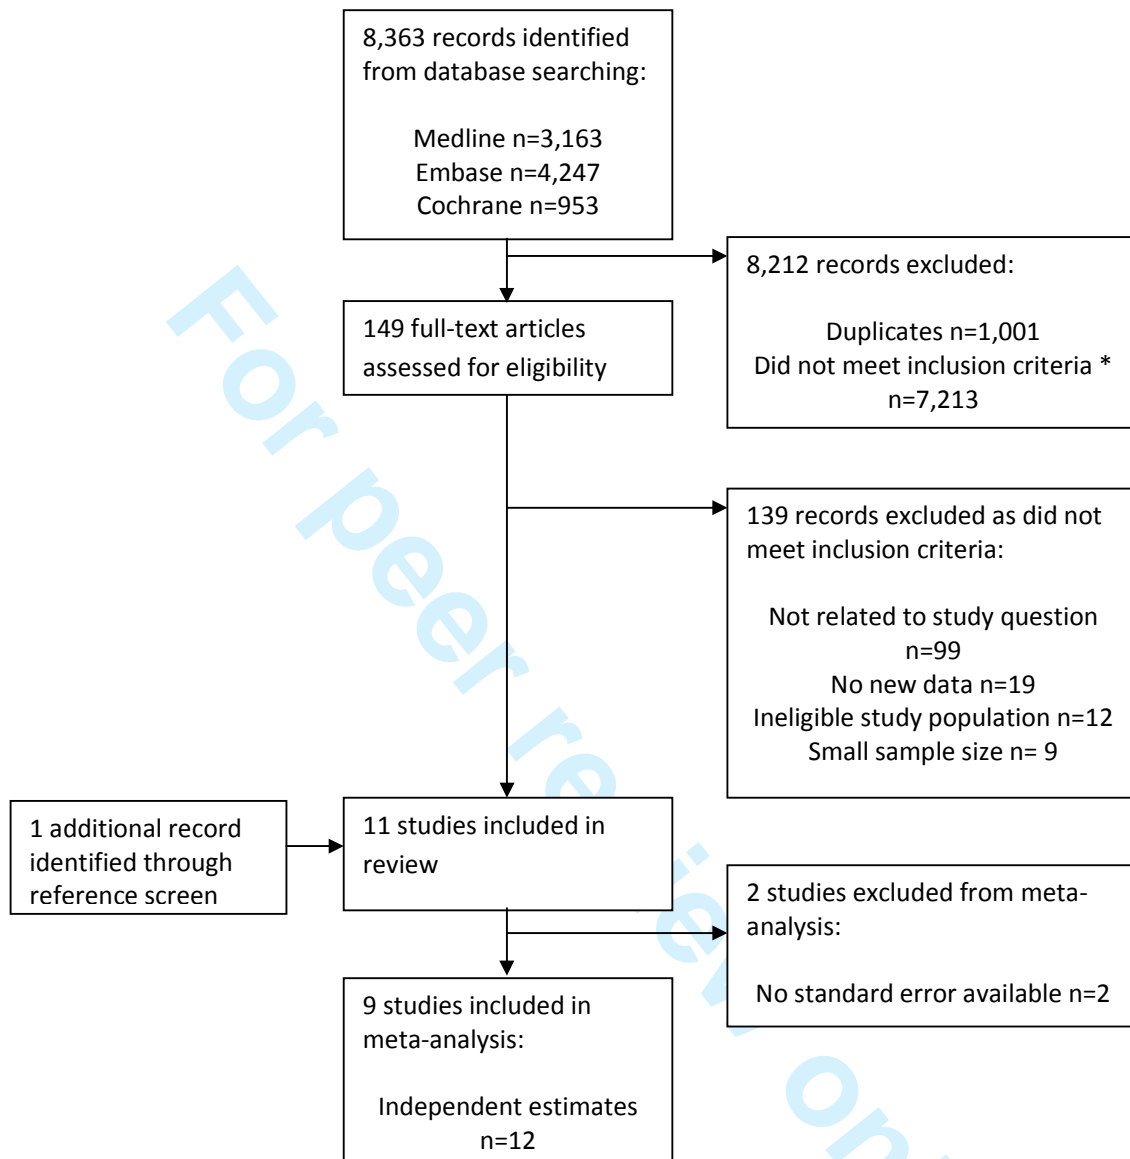

\* Common examples of ineligible studies returned by the database searches included: studies in which renal failure and infection were both outcomes, studies in which renal failure and infection were both exclusion criteria, studies of acute renal failure resulting from sepsis or antibiotic use, studies of chronic infections (e.g. hepatitis C, BK viraemia, tuberculosis) following organ transplantation, descriptive studies of UTIs, descriptive studies of CKD, studies of predictors of prognosis among patients with infections, and review articles without any original data.

1  
2  
3  
4  
5  
6  
7  
8  
9  
10  
11  
12  
13  
14  
15  
16  
17  
18  
19  
20  
21  
22  
23  
24  
25  
26  
27  
28  
29  
30  
31  
32  
33  
34  
35  
36  
37  
38  
39  
40  
41  
42  
43  
44  
45  
46  
47  
48  
49  
50  
51  
52  
53  
54  
55  
56  
57  
58  
59  
60

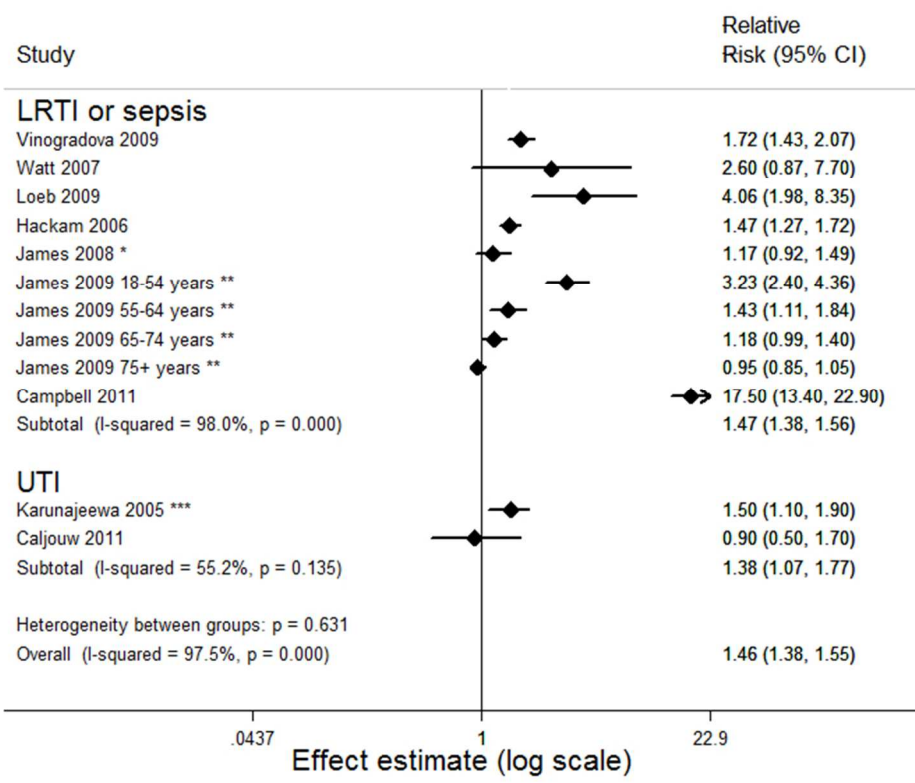

253x215mm (72 x 72 DPI)

View Only

Supplementary Table 1: Medline search strategy

|    | Search                                                                                                                                                                                                                                                                                                                                                                                                                                                                                                                                                                                                                                                                                                                                                                                                                                                                                                                                                                                                                                                                                                                                                                                                                                    | Results |
|----|-------------------------------------------------------------------------------------------------------------------------------------------------------------------------------------------------------------------------------------------------------------------------------------------------------------------------------------------------------------------------------------------------------------------------------------------------------------------------------------------------------------------------------------------------------------------------------------------------------------------------------------------------------------------------------------------------------------------------------------------------------------------------------------------------------------------------------------------------------------------------------------------------------------------------------------------------------------------------------------------------------------------------------------------------------------------------------------------------------------------------------------------------------------------------------------------------------------------------------------------|---------|
| 1  | (sepsis* or septic?emia or bacter?emia or fung?emia or pneumonia* or bronchopneumonia* or pleuropneumonia* or LRTI or empy?ema or influenza* or legionell* or bacteriuri* or pyelonephriti* or cystitis* or pyelocystitis* or pyelitis* or urethriti* or UTI or meningiti* or meningococc* or encephaliti* or poliomyeliti* or septic shock).tw.                                                                                                                                                                                                                                                                                                                                                                                                                                                                                                                                                                                                                                                                                                                                                                                                                                                                                          | 343181  |
| 2  | (CNS adj4 infection*).tw.                                                                                                                                                                                                                                                                                                                                                                                                                                                                                                                                                                                                                                                                                                                                                                                                                                                                                                                                                                                                                                                                                                                                                                                                                 | 2545    |
| 3  | (central nervous adj4 infection*).tw.                                                                                                                                                                                                                                                                                                                                                                                                                                                                                                                                                                                                                                                                                                                                                                                                                                                                                                                                                                                                                                                                                                                                                                                                     | 3805    |
| 4  | exp cerebral phaeohyphomycosis/ or central nervous system infections/ or exp brain abscess/ or exp toxoplasmosis, cerebral/ or central nervous system bacterial infections/ or exp empyema, subdural/ or exp epidural abscess/ or exp lyme neuroborreliosis/ or exp meningitis, bacterial/ or exp meningitis, escherichia coli/ or exp meningitis, haemophilus/ or exp meningitis, listeria/ or exp meningitis, meningococcal/ or exp meningitis, pneumococcal/ or exp central nervous system fungal infections/ or exp meningitis, fungal/ or exp meningitis, cryptococcal/ or exp neuroaspergillosis/ or central nervous system viral diseases/ or exp encephalitis/ or exp encephalitis, viral/ or exp encephalitis, arbovirus/ or exp encephalitis, california/ or exp encephalitis, japanese/ or exp "encephalitis, st. louis"/ or exp encephalitis, tick-borne/ or exp west nile fever/ or exp encephalitis, herpes simplex/ or exp encephalitis, varicella zoster/ or exp encephalomyelitis, equine/ or exp meningitis, viral/ or exp lymphocytic choriomeningitis/ or exp meningitis, aseptic/ or exp paraparesis, tropical spastic/ or poliomyelitis/ or exp poliomyelitis, bulbar/ or exp encephalomyelitis/ or exp meningitis/ | 102876  |
| 5  | exp endocarditis, bacterial/ or exp endocarditis, subacute bacterial/ or exp pneumococcal infections/ or catheter-related infections/ or exp coinfection/ or communicable diseases/ or exp community-acquired infections/ or exp sepsis/ or exp bacteremia/ or exp hemorrhagic septicemia/ or exp fungemia/ or exp shock, septic/ or exp empyema/ or exp viremia/ or exp parasitemia/                                                                                                                                                                                                                                                                                                                                                                                                                                                                                                                                                                                                                                                                                                                                                                                                                                                     | 139752  |
| 6  | ((renal or kidney) adj4 chronic adj4 failure*).tw.                                                                                                                                                                                                                                                                                                                                                                                                                                                                                                                                                                                                                                                                                                                                                                                                                                                                                                                                                                                                                                                                                                                                                                                        | 21053   |
| 7  | ((renal or kidney) adj4 chronic adj4 disease*).tw.                                                                                                                                                                                                                                                                                                                                                                                                                                                                                                                                                                                                                                                                                                                                                                                                                                                                                                                                                                                                                                                                                                                                                                                        | 15978   |
| 8  | ((renal or kidney) adj4 chronic adj4 insufficienc*).tw.                                                                                                                                                                                                                                                                                                                                                                                                                                                                                                                                                                                                                                                                                                                                                                                                                                                                                                                                                                                                                                                                                                                                                                                   | 4448    |
| 9  | ((renal or kidney) adj4 chronic adj4 injury).tw.                                                                                                                                                                                                                                                                                                                                                                                                                                                                                                                                                                                                                                                                                                                                                                                                                                                                                                                                                                                                                                                                                                                                                                                          | 454     |
| 10 | ((renal or kidney) adj4 chronic adj4 impairment*).tw.                                                                                                                                                                                                                                                                                                                                                                                                                                                                                                                                                                                                                                                                                                                                                                                                                                                                                                                                                                                                                                                                                                                                                                                     | 336     |
| 11 | (creatinine* or GFR or eGFR or albuminuri* or proteinuri* or microalbuminuri* or                                                                                                                                                                                                                                                                                                                                                                                                                                                                                                                                                                                                                                                                                                                                                                                                                                                                                                                                                                                                                                                                                                                                                          | 194742  |

|    |    |                                                                                           |
|----|----|-------------------------------------------------------------------------------------------|
| 1  |    |                                                                                           |
| 2  |    |                                                                                           |
| 3  |    |                                                                                           |
| 4  |    | nephropath* or glomerulo* or nephro#ti* or nephrosi* or ur?emia or ESRD or CKD or         |
| 5  |    | cardio-renal or Kimmelstiel-Wilson).tw.                                                   |
| 6  |    |                                                                                           |
| 7  | 12 | Creatinine/bl [Blood] 25724                                                               |
| 8  |    |                                                                                           |
| 9  | 13 | Kidney Diseases/co, ep [Complications, Epidemiology] 11809                                |
| 10 |    |                                                                                           |
| 11 | 14 | exp diabetic nephropathies/ or exp hypertension, renal/ or exp nephritis/ or exp anti-    |
| 12 |    | glomerular basement membrane disease/ or exp glomerulonephritis, iga/ or exp              |
| 13 |    | glomerulonephritis, membranoproliferative/ or exp glomerulonephritis, membranous/         |
| 14 |    | or exp lupus nephritis/ or exp nephrosclerosis/ or exp nephrosis/ or exp renal            |
| 15 |    | insufficiency/ or exp cardio-renal syndrome/ or exp uremia/ or exp azotemia/ or exp       |
| 16 |    | proteinuria/ 234481                                                                       |
| 17 |    |                                                                                           |
| 18 |    |                                                                                           |
| 19 | 15 | kidney function tests/ or exp glomerular filtration rate/ 44837                           |
| 20 |    |                                                                                           |
| 21 | 16 | Animals/ 4889105                                                                          |
| 22 |    |                                                                                           |
| 23 | 17 | Humans/ 12139628                                                                          |
| 24 |    |                                                                                           |
| 25 | 18 | 16 not (16 and 17) 3594930                                                                |
| 26 |    |                                                                                           |
| 27 | 19 | Adult/ 3567838                                                                            |
| 28 |    |                                                                                           |
| 29 | 20 | exp child/ or exp child, preschool/ or exp infant/ 1849722                                |
| 30 |    |                                                                                           |
| 31 | 21 | 20 not (19 and 20) 1265383                                                                |
| 32 |    |                                                                                           |
| 33 | 22 | Case reports/ 1557478                                                                     |
| 34 |    |                                                                                           |
| 35 | 23 | developing countries/ or exp africa/ or cuba/ or dominica/ or dominican republic/ or      |
| 36 |    | grenada/ or guadeloupe/ or haiti/ or jamaica/ or exp central america/ or "gulf of         |
| 37 |    | mexico"/ or latin america/ or exp south america/ or exp asia, central/ or borneo/ or      |
| 38 |    | cambodia/ or east timor/ or indonesia/ or laos/ or malaysia/ or mekong valley/ or         |
| 39 |    | myanmar/ or philippines/ or thailand/ or vietnam/ or bangladesh/ or india/ or             |
| 40 |    | afghanistan/ or iran/ or iraq/ or jordan/ or lebanon/ or syria/ or turkey/ or yemen/ or   |
| 41 |    | nepal/ or pakistan/ or sri lanka/ or exp china/ or "democratic people's republic of       |
| 42 |    | korea"/ or mongolia/ or albania/ or latvia/ or lithuania/ or bosnia-herzegovina/ or       |
| 43 |    | bulgaria/ or "republic of belarus"/ or romania/ or exp russia/ or serbia/ or ukraine/ or  |
| 44 |    | yugoslavia/ or exp transcaucasia/ or exp indian ocean islands/ or fiji/ or papua new      |
| 45 |    | guinea/ or vanuatu/ or palau/ or hawaii/ 620630                                           |
| 46 |    |                                                                                           |
| 47 |    |                                                                                           |
| 48 | 24 | developed countries/ or bahamas/ or barbados/ or netherlands antilles/ or puerto rico/    |
| 49 |    | or "trinidad and tobago"/ or "virgin islands of the united states"/ or canada/ or         |
| 50 |    | greenland/ or united states/ or brunei/ or singapore/ or bahrain/ or israel/ or kuwait/   |
| 51 |    | or oman/ or qatar/ or saudi arabia/ or united arab emirates/ or hong kong/ or macau/      |
| 52 |    | or exp japan/ or "republic of korea"/ or bermuda/ or exp australia/ or andorra/ or        |
| 53 |    | austria/ or belgium/ or estonia/ or croatia/ or czech republic/ or hungary/ or poland/ or |
| 54 |    | 1800832                                                                                   |
| 55 |    |                                                                                           |
| 56 |    |                                                                                           |
| 57 |    |                                                                                           |
| 58 |    |                                                                                           |
| 59 |    |                                                                                           |
| 60 |    |                                                                                           |

|    |                                                                                                                                                                                                                                                                                                                                                                                                                                                                                                                                                                                                                                                                                                             |         |
|----|-------------------------------------------------------------------------------------------------------------------------------------------------------------------------------------------------------------------------------------------------------------------------------------------------------------------------------------------------------------------------------------------------------------------------------------------------------------------------------------------------------------------------------------------------------------------------------------------------------------------------------------------------------------------------------------------------------------|---------|
|    | slovakia/ or slovenia/ or finland/ or exp france/ or exp germany/ or gibraltar/ or exp<br>great britain/ or greece/ or iceland/ or ireland/ or exp italy/ or liechtenstein/ or<br>luxembourg/ or cyprus/ or malta/ or monaco/ or netherlands/ or portugal/ or san<br>marino/ or exp scandinavia/ or spain/ or switzerland/ or new zealand/ or new<br>caledonia/ or guam/                                                                                                                                                                                                                                                                                                                                    |         |
| 25 | 23 not (23 and 24)                                                                                                                                                                                                                                                                                                                                                                                                                                                                                                                                                                                                                                                                                          | 556094  |
| 26 | Postoperative complications.sh.                                                                                                                                                                                                                                                                                                                                                                                                                                                                                                                                                                                                                                                                             | 263650  |
| 27 | (incidence* or odds ratio or risk ratio or risk factor or relative risk).tw.                                                                                                                                                                                                                                                                                                                                                                                                                                                                                                                                                                                                                                | 608698  |
| 28 | (respiratory adj3 infection*).tw.                                                                                                                                                                                                                                                                                                                                                                                                                                                                                                                                                                                                                                                                           | 28563   |
| 29 | (lower respiratory adj3 infection*).tw.                                                                                                                                                                                                                                                                                                                                                                                                                                                                                                                                                                                                                                                                     | 4633    |
| 30 | (urinary adj3 infection*).tw.                                                                                                                                                                                                                                                                                                                                                                                                                                                                                                                                                                                                                                                                               | 28333   |
| 31 | (upper urinary adj3 infection*).tw.                                                                                                                                                                                                                                                                                                                                                                                                                                                                                                                                                                                                                                                                         | 312     |
| 32 | 6 or 7 or 8 or 9 or 10 or 11 or 12 or 13 or 14 or 15                                                                                                                                                                                                                                                                                                                                                                                                                                                                                                                                                                                                                                                        | 366856  |
| 33 | (exp incidence/ or exp multivariate analysis/ or exp odds ratio/ or exp logistic models/<br>or exp risk factors/ or exp epidemiologic studies/).sh.                                                                                                                                                                                                                                                                                                                                                                                                                                                                                                                                                         | 1799348 |
| 34 | (exp pyelitis/ or exp pyelocystitis/ or exp pyelonephritis/ or exp urethritis/ or cystitis or<br>urinary tract infections or exp pyuria/).sh.                                                                                                                                                                                                                                                                                                                                                                                                                                                                                                                                                               | 50526   |
| 35 | (respiratory tract infections or exp bronchiolitis/ or exp bronchiolitis, viral/ or<br>empyema, pleural or exp influenza, human/ or exp legionellosis/ or exp legionnaires'<br>disease/ or exp lung abscess/ or exp lung diseases, fungal/ or exp lung diseases,<br>parasitic/ or exp pneumonia/ or exp bronchopneumonia/ or exp pleuropneumonia/ or<br>exp pneumonia, bacterial/ or exp chlamydial pneumonia/ or exp pneumonia,<br>mycoplasma/ or exp pneumonia, pneumococcal/ or exp pneumonia, rickettsial/ or exp<br>pneumonia, staphylococcal/ or exp pneumonia, pneumocystis/ or exp pneumonia,<br>viral/ or exp severe acute respiratory syndrome/ or exp tracheitis/ or exp whooping<br>cough/).sh. | 155035  |
| 36 | 1 or 2 or 3 or 4 or 5 or 28 or 29 or 30 or 31 or 34 or 35                                                                                                                                                                                                                                                                                                                                                                                                                                                                                                                                                                                                                                                   | 585963  |
| 37 | 27 or 33                                                                                                                                                                                                                                                                                                                                                                                                                                                                                                                                                                                                                                                                                                    | 2098986 |
| 38 | 32 and 36 and 37                                                                                                                                                                                                                                                                                                                                                                                                                                                                                                                                                                                                                                                                                            | 5940    |
| 39 | 38 not 18 not 21 not 22 not 25 not 26                                                                                                                                                                                                                                                                                                                                                                                                                                                                                                                                                                                                                                                                       | 3514    |
| 40 | limit 39 to (english or french or german)                                                                                                                                                                                                                                                                                                                                                                                                                                                                                                                                                                                                                                                                   | 3163    |

Supplementary Table 2: Embase search strategy

|    | Search                                                                                                                                                            | Results |
|----|-------------------------------------------------------------------------------------------------------------------------------------------------------------------|---------|
| 1  | kidney failure/co, ep [Complication, Epidemiology]                                                                                                                | 13218   |
| 2  | chronic kidney failure/co, ep [Complication, Epidemiology]                                                                                                        | 10827   |
| 3  | exp proteinuria/co, ep [Complication, Epidemiology]                                                                                                               | 5456    |
| 4  | uremia/co, ep [Complication, Epidemiology]                                                                                                                        | 3030    |
| 5  | glomerulus filtration rate/                                                                                                                                       | 43185   |
| 6  | creatinine clearance/                                                                                                                                             | 17973   |
| 7  | glomerulosclerosis/co, ep [Complication, Epidemiology]                                                                                                            | 450     |
| 8  | kidney disease/co, ep [Complication, Epidemiology]                                                                                                                | 10406   |
| 9  | analgesic nephropathy/co, ep [Complication, Epidemiology]                                                                                                         | 39      |
| 10 | chronic kidney disease/co, ep [Complication, Epidemiology]                                                                                                        | 1733    |
| 11 | diabetic nephropathy/co, ep [Complication, Epidemiology]                                                                                                          | 9683    |
| 12 | allergic glomerulonephritis/co, ep [Complication, Epidemiology]                                                                                                   | 109     |
| 13 | immune complex nephritis/co, ep [Complication, Epidemiology]                                                                                                      | 77      |
| 14 | immunoglobulin A nephropathy/co, ep [Complication, Epidemiology]                                                                                                  | 678     |
| 15 | kidney amyloidosis/co, ep [Complication, Epidemiology]                                                                                                            | 228     |
| 16 | nephritis/co, ep [Complication, Epidemiology]                                                                                                                     | 1053    |
| 17 | glomerulitis/                                                                                                                                                     | 456     |
| 18 | Goodpasture syndrome/co, ep [Complication, Epidemiology]                                                                                                          | 31      |
| 19 | immune complex nephritis/co, ep [Complication, Epidemiology]                                                                                                      | 77      |
| 20 | interstitial nephritis/co, ep [Complication, Epidemiology]                                                                                                        | 901     |
| 21 | lupus erythematosus nephritis/co, ep [Complication, Epidemiology]                                                                                                 | 850     |
| 22 | nephrosis/co, ep [Complication, Epidemiology]                                                                                                                     | 189     |
| 23 | nephrotic syndrome/co, ep [Complication, Epidemiology]                                                                                                            | 2133    |
| 24 | exp glomerulopathy/co, ep [Complication, Epidemiology]                                                                                                            | 5475    |
| 25 | exp glomerulonephritis/co, ep [Complication, Epidemiology]                                                                                                        | 4296    |
| 26 | exp kidney dysfunction/co, ep [Complication, Epidemiology]                                                                                                        | 1322    |
| 27 | (creatinine* or GFR or eGFR or albuminuri* or proteinuri* or microalbuminuri* or nephropath* or glomerulo* or nephr#ti* or nephrosi* or ur?emia or ESRD or CKD or | 282722  |

|    |    |                                                                                                                                                                                                                                                                                                                            |
|----|----|----------------------------------------------------------------------------------------------------------------------------------------------------------------------------------------------------------------------------------------------------------------------------------------------------------------------------|
| 1  |    |                                                                                                                                                                                                                                                                                                                            |
| 2  |    |                                                                                                                                                                                                                                                                                                                            |
| 3  |    |                                                                                                                                                                                                                                                                                                                            |
| 4  |    |                                                                                                                                                                                                                                                                                                                            |
| 5  |    |                                                                                                                                                                                                                                                                                                                            |
| 6  | 28 | ((renal or kidney) adj4 chronic adj4 failure*).tw. 28639                                                                                                                                                                                                                                                                   |
| 7  | 29 | ((renal or kidney) adj4 chronic adj4 disease*).tw. 23893                                                                                                                                                                                                                                                                   |
| 8  |    |                                                                                                                                                                                                                                                                                                                            |
| 9  | 30 | ((renal or kidney) adj4 chronic adj4 insufficienc*).tw. 6425                                                                                                                                                                                                                                                               |
| 10 |    |                                                                                                                                                                                                                                                                                                                            |
| 11 | 31 | ((renal or kidney) adj4 chronic adj4 injury).tw. 631                                                                                                                                                                                                                                                                       |
| 12 |    |                                                                                                                                                                                                                                                                                                                            |
| 13 | 32 | ((renal or kidney) adj4 chronic adj4 impairment*).tw. 501                                                                                                                                                                                                                                                                  |
| 14 |    |                                                                                                                                                                                                                                                                                                                            |
| 15 | 33 | exp infectious pneumonia/ or bacterial pneumonia/ or chlamydial pneumonia/ or group b<br>streptococcal pneumonia/ or legionnaire disease/ or mycoplasma pneumonia/ or<br>pneumocystis pneumonia/ or pulmonary candidiasis/ or severe acute respiratory<br>syndrome/ or staphylococcal pneumonia/ or virus pneumonia/ 50671 |
| 16 |    |                                                                                                                                                                                                                                                                                                                            |
| 17 |    |                                                                                                                                                                                                                                                                                                                            |
| 18 |    |                                                                                                                                                                                                                                                                                                                            |
| 19 |    |                                                                                                                                                                                                                                                                                                                            |
| 20 |    |                                                                                                                                                                                                                                                                                                                            |
| 21 | 34 | respiratory tract infection/ or exp influenza/ or laryngotracheobronchitis/ or lower<br>respiratory tract infection/ or parainfluenza virus infection/ or respiratory syncytial virus<br>infection/ or viral respiratory tract infection/ 106624                                                                           |
| 22 |    |                                                                                                                                                                                                                                                                                                                            |
| 23 |    |                                                                                                                                                                                                                                                                                                                            |
| 24 |    |                                                                                                                                                                                                                                                                                                                            |
| 25 | 35 | avian influenza/ 5081                                                                                                                                                                                                                                                                                                      |
| 26 |    |                                                                                                                                                                                                                                                                                                                            |
| 27 | 36 | chest infection/ or pertussis/ 13997                                                                                                                                                                                                                                                                                       |
| 28 |    |                                                                                                                                                                                                                                                                                                                            |
| 29 | 37 | bronchiolitis/ or laryngotracheobronchitis/ or tracheobronchitis/ 10003                                                                                                                                                                                                                                                    |
| 30 |    |                                                                                                                                                                                                                                                                                                                            |
| 31 | 38 | pleura empyema/ 3703                                                                                                                                                                                                                                                                                                       |
| 32 |    |                                                                                                                                                                                                                                                                                                                            |
| 33 | 39 | pyuria/ or urinary tract infection/ 66023                                                                                                                                                                                                                                                                                  |
| 34 |    |                                                                                                                                                                                                                                                                                                                            |
| 35 | 40 | candiduria/ or kidney infection/ 1502                                                                                                                                                                                                                                                                                      |
| 36 |    |                                                                                                                                                                                                                                                                                                                            |
| 37 | 41 | kidney abscess/ or pyonephrosis/ 1666                                                                                                                                                                                                                                                                                      |
| 38 |    |                                                                                                                                                                                                                                                                                                                            |
| 39 | 42 | cystitis/ 11865                                                                                                                                                                                                                                                                                                            |
| 40 |    |                                                                                                                                                                                                                                                                                                                            |
| 41 | 43 | pyelonephritis/ or acute pyelonephritis/ 22138                                                                                                                                                                                                                                                                             |
| 42 |    |                                                                                                                                                                                                                                                                                                                            |
| 43 | 44 | brain infection/ or brain abscess/ or herpes simplex encephalitis/ or herpes zoster<br>encephalitis/ or subdural empyema/ or tick borne encephalitis/ or virus encephalitis/ 24862                                                                                                                                         |
| 44 |    |                                                                                                                                                                                                                                                                                                                            |
| 45 | 45 | central nervous system infection/ or epidural abscess/ or poliomyelitis/ 38386                                                                                                                                                                                                                                             |
| 46 |    |                                                                                                                                                                                                                                                                                                                            |
| 47 | 46 | meningitis/ or bacterial meningitis/ or exp fungal meningitis/ or haemophilus meningitis/<br>or lymphocytic choriomeningitis/ or subdural empyema/ or virus meningitis/ 57864                                                                                                                                              |
| 48 |    |                                                                                                                                                                                                                                                                                                                            |
| 49 |    |                                                                                                                                                                                                                                                                                                                            |
| 50 | 47 | encephalitis/ or brain ventriculitis/ or eastern equine encephalitis/ or encephalomyelitis/<br>or epidemic encephalitis/ or meningoencephalitis/ or panencephalitis/ or primary amebic<br>meningoencephalitis/ 47288                                                                                                       |
| 51 |    |                                                                                                                                                                                                                                                                                                                            |
| 52 |    |                                                                                                                                                                                                                                                                                                                            |
| 53 |    |                                                                                                                                                                                                                                                                                                                            |
| 54 |    |                                                                                                                                                                                                                                                                                                                            |
| 55 | 48 | exp meningococcosis/ 11231                                                                                                                                                                                                                                                                                                 |
| 56 |    |                                                                                                                                                                                                                                                                                                                            |
| 57 | 49 | exp pneumococcal infection/ 5729                                                                                                                                                                                                                                                                                           |
| 58 |    |                                                                                                                                                                                                                                                                                                                            |
| 59 |    |                                                                                                                                                                                                                                                                                                                            |
| 60 |    |                                                                                                                                                                                                                                                                                                                            |

|    |                                                                                                                                                                                                                                                                                                                                        |         |
|----|----------------------------------------------------------------------------------------------------------------------------------------------------------------------------------------------------------------------------------------------------------------------------------------------------------------------------------------|---------|
| 50 | exp group b streptococcal infection/ or group b streptococcal pneumonia/                                                                                                                                                                                                                                                               | 405     |
| 51 | exp bacteremia/ or staphylococcal bacteremia/                                                                                                                                                                                                                                                                                          | 29638   |
| 52 | bloodstream infection/                                                                                                                                                                                                                                                                                                                 | 2518    |
| 53 | candidemia/                                                                                                                                                                                                                                                                                                                            | 1358    |
| 54 | systemic mycosis/ or fungemia/ or invasive aspergillosis/ or invasive candidiasis/                                                                                                                                                                                                                                                     | 5182    |
| 55 | sepsis/ or bacteremia/ or septic shock/ or septicemia/ or urosepsis/                                                                                                                                                                                                                                                                   | 140091  |
| 56 | viremia/                                                                                                                                                                                                                                                                                                                               | 12287   |
| 57 | parasitemia/                                                                                                                                                                                                                                                                                                                           | 6918    |
| 58 | (sepsis* or septic?emia or bacter?emia or fung?emia or pneumonia* or bronchopneumonia* or pleuropneumonia* or LRTI or empy?ema or influenza* or legionell* or bacteriuri* or pyelonephritis or cystitis or pyelocystitis or pyelitis or urethriti* or meningiti* or meningococc* or encephaliti* or poliomyeliti* or septic shock).tw. | 497436  |
| 59 | (CNS adj4 infection*).tw.                                                                                                                                                                                                                                                                                                              | 3591    |
| 60 | (central nervous adj4 infection*).tw.                                                                                                                                                                                                                                                                                                  | 4861    |
| 61 | UTI.tw.                                                                                                                                                                                                                                                                                                                                | 6684    |
| 62 | bronchopneumonia/                                                                                                                                                                                                                                                                                                                      | 8394    |
| 63 | arachnoiditis/ or aseptic meningitis/ or epidemic meningitis/ or group b streptococcal meningitis/ or meningoenkephalitis/ or pneumococcal meningitis/                                                                                                                                                                                 | 21305   |
| 64 | exp epidemiology/ or exp incidence/                                                                                                                                                                                                                                                                                                    | 1705072 |
| 65 | exp risk factor/                                                                                                                                                                                                                                                                                                                       | 513022  |
| 66 | exp attributable risk/                                                                                                                                                                                                                                                                                                                 | 1487    |
| 67 | exp hazard ratio/                                                                                                                                                                                                                                                                                                                      | 11362   |
| 68 | statistical model/                                                                                                                                                                                                                                                                                                                     | 87903   |
| 69 | (odds adj1 ratio).tw.                                                                                                                                                                                                                                                                                                                  | 101865  |
| 70 | (relative adj2 ratio).tw.                                                                                                                                                                                                                                                                                                              | 2736    |
| 71 | case report/                                                                                                                                                                                                                                                                                                                           | 1892302 |
| 72 | developing country/                                                                                                                                                                                                                                                                                                                    | 71459   |
| 73 | developed country/                                                                                                                                                                                                                                                                                                                     | 25618   |
| 74 | postoperative complication/ or postoperative infection/ or surgical infection/                                                                                                                                                                                                                                                         | 272218  |
| 75 | exp Africa/                                                                                                                                                                                                                                                                                                                            | 196804  |



|    |    |                                                                                              |
|----|----|----------------------------------------------------------------------------------------------|
| 1  |    |                                                                                              |
| 2  |    |                                                                                              |
| 3  |    |                                                                                              |
| 4  | 76 | argentina/ or bolivia/ or brazil/ or chile/ or colombia/ or ecuador/ or french guiana/ or    |
| 5  |    | guyana/ or paraguay/ or peru/ or suriname/ or uruguay/ or venezuela/                         |
| 6  |    | 98392                                                                                        |
| 7  | 77 | exp Central America/                                                                         |
| 8  |    | 15618                                                                                        |
| 9  | 78 | china/ or mongolia/ or philippines/                                                          |
| 10 |    | 82530                                                                                        |
| 11 | 79 | borneo/ or cambodia/ or indonesia/ or laos/ or malaysia/ or myanmar/ or papua new            |
| 12 |    | guinea/ or thailand/ or timor-leste/ or viet nam/                                            |
| 13 |    | 53670                                                                                        |
| 14 | 80 | North Korea/                                                                                 |
| 15 |    | 237                                                                                          |
| 16 | 81 | latvia/ or lithuania/                                                                        |
| 17 |    | 3316                                                                                         |
| 18 | 82 | albania/ or armenia/ or azerbaijan/ or belarus/ or "bosnia and herzegovina"/ or bulgaria/    |
| 19 |    | or "georgia (republic)"/ or "macedonia (republic)"/ or romania/ or russian federation/ or    |
| 20 |    | serbia/ or ukraine/                                                                          |
| 21 |    | 83374                                                                                        |
| 22 | 83 | USSR/                                                                                        |
| 23 |    | 50149                                                                                        |
| 24 | 84 | iran/ or iraq/ or jordan/ or lebanon/ or "turkey (republic)"/ or yemen/                      |
| 25 |    | 49920                                                                                        |
| 26 | 85 | kazakhstan/ or kyrgyzstan/ or tajikistan/ or turkmenistan/ or uzbekistan/                    |
| 27 |    | 5682                                                                                         |
| 28 | 86 | afghanistan/ or bangladesh/ or india/ or nepal/ or pakistan/ or sikkim/ or sri lanka/        |
| 29 |    | 105351                                                                                       |
| 30 | 87 | cuba/ or dominica/ or dominican republic/ or grenada/ or guadeloupe/ or haiti/ or            |
| 31 |    | jamaica/                                                                                     |
| 32 |    | 11346                                                                                        |
| 33 | 88 | fiji/ or philippines/ or polynesia/                                                          |
| 34 |    | 8607                                                                                         |
| 35 | 89 | exp Indian Ocean/                                                                            |
| 36 |    | 2505                                                                                         |
| 37 | 90 | Mexico/                                                                                      |
| 38 |    | 28748                                                                                        |
| 39 | 91 | 72 or 75 or 76 or 77 or 78 or 79 or 80 or 81 or 82 or 83 or 84 or 85 or 86 or 87 or 88 or 89 |
| 40 |    | or 90                                                                                        |
| 41 |    | 789122                                                                                       |
| 42 | 92 | exp Western Europe/                                                                          |
| 43 |    | 911511                                                                                       |
| 44 | 93 | croatia/ or czech republic/ or hungary/ or poland/ or slovakia/ or slovenia/                 |
| 45 |    | 73494                                                                                        |
| 46 | 94 | Estonia/                                                                                     |
| 47 |    | 2056                                                                                         |
| 48 | 95 | canada/ or united states/                                                                    |
| 49 |    | 1031054                                                                                      |
| 50 | 96 | japan/ or macao/                                                                             |
| 51 |    | 115065                                                                                       |
| 52 | 97 | South Korea/                                                                                 |
| 53 |    | 4982                                                                                         |
| 54 | 98 | bahrain/ or cyprus/ or israel/ or kuwait/ or oman/ or qatar/ or saudi arabia/ or united      |
| 55 |    | arab emirates/                                                                               |
| 56 |    | 37707                                                                                        |
| 57 | 99 | exp "Australia and New Zealand"/                                                             |
| 58 |    | 129186                                                                                       |
| 59 |    |                                                                                              |
| 60 |    |                                                                                              |

|    |     |                                                                                                        |
|----|-----|--------------------------------------------------------------------------------------------------------|
| 1  |     |                                                                                                        |
| 2  |     |                                                                                                        |
| 3  |     |                                                                                                        |
| 4  | 100 | brunei darussalam/ or hong kong/ or singapore/ 21427                                                   |
| 5  | 101 | 73 or 92 or 93 or 94 or 95 or 96 or 97 or 98 or 99 or 100 2259038                                      |
| 6  |     |                                                                                                        |
| 7  | 102 | 91 not (91 and 101) 710496                                                                             |
| 8  |     |                                                                                                        |
| 9  | 103 | treatment outcome/ 579285                                                                              |
| 10 |     |                                                                                                        |
| 11 | 104 | editorial/ 438527                                                                                      |
| 12 |     |                                                                                                        |
| 13 | 105 | embryo/ 177038                                                                                         |
| 14 | 106 | infant/ 533322                                                                                         |
| 15 |     |                                                                                                        |
| 16 | 107 | child/ 1295310                                                                                         |
| 17 |     |                                                                                                        |
| 18 | 108 | preschool child/ 469034                                                                                |
| 19 |     |                                                                                                        |
| 20 | 109 | school child/ 217344                                                                                   |
| 21 |     |                                                                                                        |
| 22 | 110 | adolescent/ 1180705                                                                                    |
| 23 |     |                                                                                                        |
| 24 | 111 | adult/ 4186945                                                                                         |
| 25 |     |                                                                                                        |
| 26 | 112 | 105 or 106 or 107 or 108 or 109 or 110 2546570                                                         |
| 27 |     |                                                                                                        |
| 28 | 113 | 112 not (112 and 111) 1658687                                                                          |
| 29 |     |                                                                                                        |
| 30 | 114 | animal model/ 630310                                                                                   |
| 31 |     |                                                                                                        |
| 32 | 115 | animal experiment/ 1606715                                                                             |
| 33 |     |                                                                                                        |
| 34 | 116 | nonhuman/ 3807183                                                                                      |
| 35 |     |                                                                                                        |
| 36 | 117 | animal/ 1773703                                                                                        |
| 37 |     |                                                                                                        |
| 38 | 118 | human/ 13422168                                                                                        |
| 39 |     |                                                                                                        |
| 40 | 119 | 114 or 115 or 116 or 117 5921124                                                                       |
| 41 |     |                                                                                                        |
| 42 | 120 | 119 not (119 and 118) 4747089                                                                          |
| 43 |     |                                                                                                        |
| 44 | 121 | pneumonia/ 97950                                                                                       |
| 45 |     |                                                                                                        |
| 46 | 122 | lung infection/ or hantavirus pulmonary syndrome/ or lung abscess/ or viral bronchiolitis/ 21795       |
| 47 |     |                                                                                                        |
| 48 | 123 | (respiratory adj3 infection*).tw. 43371                                                                |
| 49 |     |                                                                                                        |
| 50 | 124 | (lower respiratory adj3 infection*).tw. 6553                                                           |
| 51 |     |                                                                                                        |
| 52 | 125 | (urinary adj3 infection*).tw. 44177                                                                    |
| 53 |     |                                                                                                        |
| 54 | 126 | (upper urinary adj3 infection*).tw. 444                                                                |
| 55 |     |                                                                                                        |
| 56 | 127 | (epidemiolog\$ or incidence).tw. 878025                                                                |
| 57 |     |                                                                                                        |
| 58 | 128 | (relative adj risk*).tw. 55195                                                                         |
| 59 |     |                                                                                                        |
| 60 | 129 | 1 or 2 or 3 or 4 or 5 or 6 or 7 or 8 or 9 or 10 or 11 or 12 or 13 or 14 or 15 or 16 or 17 or 18 364340 |

|            |                                                                                                                                                                                                                                        |         |
|------------|----------------------------------------------------------------------------------------------------------------------------------------------------------------------------------------------------------------------------------------|---------|
|            | or 19 or 20 or 21 or 22 or 23 or 24 or 25 or 26 or 27 or 28 or 29 or 30 or 31 or 32                                                                                                                                                    |         |
| <b>130</b> | 33 or 34 or 35 or 36 or 37 or 38 or 39 or 40 or 41 or 42 or 43 or 44 or 45 or 46 or 47 or 48<br>or 49 or 50 or 51 or 52 or 53 or 54 or 55 or 56 or 57 or 58 or 59 or 60 or 61 or 62 or 63 or<br>121 or 122 or 123 or 124 or 125 or 126 | 851259  |
| <b>131</b> | 64 or 65 or 66 or 67 or 68 or 69 or 70 or 127 or 128                                                                                                                                                                                   | 2659100 |
| <b>132</b> | 129 and 130 and 131                                                                                                                                                                                                                    | 7357    |
| <b>133</b> | 132 not 120 not 113 not 104 not 71 not 74 not 102                                                                                                                                                                                      | 4970    |
| <b>134</b> | limit 133 to (english or french or german)                                                                                                                                                                                             | 4602    |
| <b>135</b> | limit 134 to embase                                                                                                                                                                                                                    | 4247    |

Supplementary Table 3: Cochrane library search strategy

|   | Search                                                                                                                                                                                                                                                                                                                                                                                                                                                                                                                                                                                                                                                                                                                                                                                                                                                                                                                                                                                                                                                                                                                                                                                                                                                                                                                        | Results |
|---|-------------------------------------------------------------------------------------------------------------------------------------------------------------------------------------------------------------------------------------------------------------------------------------------------------------------------------------------------------------------------------------------------------------------------------------------------------------------------------------------------------------------------------------------------------------------------------------------------------------------------------------------------------------------------------------------------------------------------------------------------------------------------------------------------------------------------------------------------------------------------------------------------------------------------------------------------------------------------------------------------------------------------------------------------------------------------------------------------------------------------------------------------------------------------------------------------------------------------------------------------------------------------------------------------------------------------------|---------|
| 1 | sepsis* or septic*mia or bacter*mia or fung*mia or pneumonia* or bronchopneumonia* or pleuropneumonia* or LRTI or empy*ma or influenza* or legionell* or bacteriuri* or pyelonephriti* or cystitis* or pyelocystitis* or pyelitis* or urethriti* or UTI or meningiti* or meningococc* or encephaliti* or poliomyeliti* or "septic shock"                                                                                                                                                                                                                                                                                                                                                                                                                                                                                                                                                                                                                                                                                                                                                                                                                                                                                                                                                                                      | 19098   |
| 2 | CNS near/4 infection*                                                                                                                                                                                                                                                                                                                                                                                                                                                                                                                                                                                                                                                                                                                                                                                                                                                                                                                                                                                                                                                                                                                                                                                                                                                                                                         | 47      |
| 3 | "central nervous" near/4 infection*                                                                                                                                                                                                                                                                                                                                                                                                                                                                                                                                                                                                                                                                                                                                                                                                                                                                                                                                                                                                                                                                                                                                                                                                                                                                                           | 92      |
| 4 | [mh "cerebral phaeohyphomycosis"] or [mh ^"central nervous system infections"] or [mh "brain abscess"] or [mh "toxoplasmosis, cerebral"] or [mh ^"central nervous system bacterial infections"] or [mh "empyema, subdural"] or [mh "epidural abscess"] or [mh "lyme neuroborreliosis"] or [mh "meningitis, bacterial"] or [mh "meningitis, escherichia coli"] or [mh "meningitis, haemophilus"] or [mh "meningitis, listeria"] or [mh "meningitis, meningococcal"] or [mh "meningitis, pneumococcal"] or [mh "central nervous system fungal infections"] or [mh "meningitis, fungal"] or [mh "meningitis, cryptococcal"] or [mh neuroaspergillosis] or [mh ^"central nervous system viral diseases"] or [mh encephalitis] or [mh "encephalitis, viral"] or [mh "encephalitis, arbovirus"] or [mh "encephalitis, california"] or [mh "encephalitis, japanese"] or [mh "encephalitis, st. louis"] or [mh "encephalitis, tick-borne"] or [mh "west nile fever"] or [mh "encephalitis, herpes simplex"] or [mh "encephalitis, varicella zoster"] or [mh "encephalomyelitis, equine"] or [mh "meningitis, viral"] or [mh "lymphocytic choriomeningitis"] or [mh "meningitis, aseptic"] or [mh "paraparesis, tropical spastic"] or [mh ^poliomyelitis] or [mh "poliomyelitis, bulbar"] or [mh encephalomyelitis] or [mh meningitis] | 1015    |
| 5 | [mh "endocarditis, bacterial"] or [mh "endocarditis, subacute bacterial"] or [mh "pneumococcal infections"] or [mh ^"catheter-related infections"] or [mh coinfection] or [mh ^"communicable diseases"] or [mh "community-acquired infections"] or [mh sepsis] or [mh bacteremia] or [mh "hemorrhagic septicemia"] or [mh fungemia] or [mh "shock, septic"] or [mh empyema] or [mh viremia] or [mh parasitemia]                                                                                                                                                                                                                                                                                                                                                                                                                                                                                                                                                                                                                                                                                                                                                                                                                                                                                                               | 4033    |
| 6 | respiratory near/3 infection*                                                                                                                                                                                                                                                                                                                                                                                                                                                                                                                                                                                                                                                                                                                                                                                                                                                                                                                                                                                                                                                                                                                                                                                                                                                                                                 | 4398    |
| 7 | urinary near/3 infection*                                                                                                                                                                                                                                                                                                                                                                                                                                                                                                                                                                                                                                                                                                                                                                                                                                                                                                                                                                                                                                                                                                                                                                                                                                                                                                     | 3732    |
| 8 | [mh pyelitis] or [mh pyelocystitis] or [mh pyelonephritis] or [mh urethritis] or [mh ^cystitis] or [mh ^"urinary tract infections"] or [mh pyuria]                                                                                                                                                                                                                                                                                                                                                                                                                                                                                                                                                                                                                                                                                                                                                                                                                                                                                                                                                                                                                                                                                                                                                                            | 2143    |
| 9 | [mh ^"respiratory tract infections"] or [mh bronchiolitis] or [mh "bronchiolitis, viral"] or [mh ^"empyema, pleural"] or [mh "influenza, human"] or [mh legionellosis] or [mh                                                                                                                                                                                                                                                                                                                                                                                                                                                                                                                                                                                                                                                                                                                                                                                                                                                                                                                                                                                                                                                                                                                                                 | 5402    |

|    |                                                                                                                                                                                                                                                                                                                                                                                                                                                                                                                                                     |        |
|----|-----------------------------------------------------------------------------------------------------------------------------------------------------------------------------------------------------------------------------------------------------------------------------------------------------------------------------------------------------------------------------------------------------------------------------------------------------------------------------------------------------------------------------------------------------|--------|
|    | "legionnaires' disease"] or [mh "lung abscess"] or [mh "lung diseases, fungal"] or exp [mh "lung diseases, parasitic"] or [mh pneumonia] or [mh bronchopneumonia] or [mh pleuropneumonia] or [mh "pneumonia, bacterial"] or [mh "chlamydial pneumonia"] or [mh "pneumonia, mycoplasma"] or [mh "pneumonia, pneumococcal"] or [mh "pneumonia, rickettsial"] or [mh "pneumonia, staphylococcal"] or [mh "pneumonia, pneumocystis"] or [mh "pneumonia, viral"] or [mh "severe acute respiratory syndrome"] or [mh tracheitis] or [mh "whooping cough"] |        |
| 10 | (renal or kidney) near/4 chronic near/4 failure*                                                                                                                                                                                                                                                                                                                                                                                                                                                                                                    | 4476   |
| 11 | (renal or kidney) near/4 chronic near/4 disease*                                                                                                                                                                                                                                                                                                                                                                                                                                                                                                    | 1647   |
| 12 | (renal or kidney) near/4 chronic near/4 insufficienc*                                                                                                                                                                                                                                                                                                                                                                                                                                                                                               | 510    |
| 13 | (renal or kidney) near/4 chronic near/4 injury                                                                                                                                                                                                                                                                                                                                                                                                                                                                                                      | 29     |
| 14 | (renal or kidney) near/4 chronic near/4 impairment*                                                                                                                                                                                                                                                                                                                                                                                                                                                                                                 | 34     |
| 15 | creatinine* or GFR or eGFR or albuminuri* or proteinuri* or microalbuminuri* or nephropath* or glomerulo* or nephro?ti* or nephrosi* or ur*mia or ESRD or CKD or cardio-renal or Kimmelstiel-Wilson                                                                                                                                                                                                                                                                                                                                                 | 16810  |
| 16 | [mh ^creatinine/BL]                                                                                                                                                                                                                                                                                                                                                                                                                                                                                                                                 | 2042   |
| 17 | [mh ^"kidney diseases"/CO,EP]                                                                                                                                                                                                                                                                                                                                                                                                                                                                                                                       | 341    |
| 18 | [mh "diabetic nephropathies"] or [mh "hypertension, renal"] or [mh nephritis] or [mh "anti-glomerular basement membrane disease"] or [mh "glomerulonephritis, iga"] or [mh "glomerulonephritis, membranoproliferative"] or [mh "glomerulonephritis, membranous"] or [mh "lupus nephritis"] or [mh nephrosclerosis] or [mh nephrosis] or [mh "renal insufficiency"] or [mh "cardio-renal syndrome"] or [mh uremia] or [mh azotemia] or [mh proteinuria]                                                                                              | 7117   |
| 19 | [mh ^"kidney function tests"] or [mh "glomerular filtration rate"]                                                                                                                                                                                                                                                                                                                                                                                                                                                                                  | 2417   |
| 20 | {or #1-#9}                                                                                                                                                                                                                                                                                                                                                                                                                                                                                                                                          | 25511  |
| 21 | {or #10-#19}                                                                                                                                                                                                                                                                                                                                                                                                                                                                                                                                        | 21120  |
| 22 | {and #20-#21}                                                                                                                                                                                                                                                                                                                                                                                                                                                                                                                                       | 1422   |
| 23 | incidence* or "odds ratio" or "risk ratio" or "risk factor" or "relative risk"                                                                                                                                                                                                                                                                                                                                                                                                                                                                      | 69239  |
| 24 | [mh incidence] or [mh "multivariate analysis"] or [mh "odds ratio"] or [mh "logistic models"] or [mh "risk factors"] or [mh "epidemiologic studies"]                                                                                                                                                                                                                                                                                                                                                                                                | 122866 |
| 25 | {or #23-#24}                                                                                                                                                                                                                                                                                                                                                                                                                                                                                                                                        | 165844 |
| 26 | {and #22, #25}                                                                                                                                                                                                                                                                                                                                                                                                                                                                                                                                      | 953    |

**Supplementary Table 4:** Inclusion and exclusion criteria for determining study eligibility

|                             | Included                                                                                                                                                                                                                                                                                                                                                                                                                                                                                                           | Excluded                                                                                                                                                                                                                                                                                                                                                 |
|-----------------------------|--------------------------------------------------------------------------------------------------------------------------------------------------------------------------------------------------------------------------------------------------------------------------------------------------------------------------------------------------------------------------------------------------------------------------------------------------------------------------------------------------------------------|----------------------------------------------------------------------------------------------------------------------------------------------------------------------------------------------------------------------------------------------------------------------------------------------------------------------------------------------------------|
| <b>Participants</b>         | Adult human participants.                                                                                                                                                                                                                                                                                                                                                                                                                                                                                          | Populations exclusively of: <ul style="list-style-type: none"> <li>- pregnant women;</li> <li>- kidney transplant recipients or patients receiving renal replacement therapy;</li> <li>- patient groups usually managed in secondary care unless this was for chronic kidney disease, or routinely treated with immunosuppressive medication.</li> </ul> |
| <b>Study settings</b>       | High income countries (World Bank classification).(13)<br>Community settings, including adults living in institutional care.                                                                                                                                                                                                                                                                                                                                                                                       |                                                                                                                                                                                                                                                                                                                                                          |
| <b>Exposure of interest</b> | Chronic acquired kidney disease, indicated by any of the following: <ul style="list-style-type: none"> <li>- medical diagnosis;</li> <li>- reduced estimated glomerular filtration rate;</li> <li>- elevated creatinine clearance;</li> <li>- elevated creatinine;</li> <li>- proteinuria, micro- or macro-albuminuria;</li> <li>- renal structural abnormalities.</li> </ul> <p>Where there was no 'unexposed' group without kidney disease, comparison between stages 1-2 and stages 3-5 CKD was accepted.</p>   |                                                                                                                                                                                                                                                                                                                                                          |
| <b>Outcomes of interest</b> | Incidence rate ratio, risk ratio or odds ratio estimates of the effect of kidney disease on any of the following community-acquired acute infections: <ul style="list-style-type: none"> <li>- lower respiratory tract infections;</li> <li>- urinary tract infections (UTIs);</li> <li>- central nervous system infections;</li> <li>- sepsis.</li> </ul> <p>Urinary catheter-associated UTIs from community settings, and incidence of severe disease (such as hospitalisation for infection) were accepted.</p> | Outcomes not accepted: <ul style="list-style-type: none"> <li>- infection prevalence;</li> <li>- hospital-associated infection rates;</li> <li>- post-operative follow up outcomes;</li> <li>- incidence of infection-related mortality;</li> <li>- prognosis among infected patients.</li> </ul>                                                        |
| <b>Study methodology</b>    | Trials, case-control studies, cohort studies or other observational study designs containing original data.<br><br>Relevant review articles without original data were identified for reference list screening.                                                                                                                                                                                                                                                                                                    | Case reports.<br>Descriptive studies without a comparison group.<br><br>Studies with fewer than 30 participants in either the exposed or unexposed categories.                                                                                                                                                                                           |
| <b>Publication details</b>  | Any publication date.<br>Languages: English, German, French.                                                                                                                                                                                                                                                                                                                                                                                                                                                       |                                                                                                                                                                                                                                                                                                                                                          |

**Supplementary Table 5:** Quality assessment of studies including rationale (n=11)

|                                                                   | Case-control studies                                                           |                                                                                |                                                                                        | Cohort studies                                                                                          |                                                                                |                                                 |                                                  |                                                  |                                                                             |                                                                                    |                                                                                |
|-------------------------------------------------------------------|--------------------------------------------------------------------------------|--------------------------------------------------------------------------------|----------------------------------------------------------------------------------------|---------------------------------------------------------------------------------------------------------|--------------------------------------------------------------------------------|-------------------------------------------------|--------------------------------------------------|--------------------------------------------------|-----------------------------------------------------------------------------|------------------------------------------------------------------------------------|--------------------------------------------------------------------------------|
|                                                                   | Vinogradova 2009 (16)                                                          | Watt 2007 (17)                                                                 | Loeb 2009 (18)                                                                         | Higgins 1989 (19)                                                                                       | Hackam 2006 (20)                                                               | Karunajeewa 2005 (21)                           | James 2008 (22)                                  | James 2009 (23)                                  | Caljouw 2011 (24)                                                           | Campbell 2011 * (25)                                                               | USRDS 2010 (26)                                                                |
| <b>Selection bias</b>                                             |                                                                                |                                                                                |                                                                                        |                                                                                                         |                                                                                |                                                 |                                                  |                                                  |                                                                             |                                                                                    |                                                                                |
| Selection of controls <sup>1</sup>                                | Low: matched selection of primary care registered patients                     | Low: neighbourhood controls selected systematically by proximity               | Low: random digit dialling of hospital catchment area residents                        | N/A: cohort study                                                                                       | N/A: cohort study                                                              | N/A: cohort study                               | N/A: cohort study                                | N/A: cohort study                                | N/A: cohort study                                                           | N/A: cohort study                                                                  | N/A: cohort study                                                              |
| Participation bias <sup>2</sup>                                   | Low: automatic participation                                                   | Low: participation 83% of cases, 84% of controls                               | Uncertain: participation rate not reported                                             | N/A: cohort study                                                                                       | N/A: cohort study                                                              | N/A: cohort study                               | N/A: cohort study                                | N/A: cohort study                                | N/A: cohort study                                                           | N/A: cohort study                                                                  | N/A: cohort study                                                              |
| Loss to follow up <sup>3</sup>                                    | N/A: case-control study                                                        | N/A: case-control study                                                        | N/A: case-control study                                                                | Uncertain: not reported and clinically determined. May be differential, but study period only one year. | Low: automated follow up                                                       | Low: automated follow up                        | Low: automated follow up                         | Low: automated follow up                         | Low: followed up 479 of 551 participants alive aged 86 years: 86% follow up | Low: active case-finding applied to national census figure (no follow up required) | Low: automated follow up                                                       |
| <b>Non-differential misclassification of exposure<sup>4</sup></b> | High: relies on medical diagnosis of chronic renal disease in medical records. | High: relied on medical diagnosis of chronic renal disease in medical records. | High: ascertained medical diagnosis of chronic renal disease in participant interview. | Uncertain: not reported when creatinine measured.                                                       | High: relies on medical diagnosis of chronic renal disease in medical records. | Low: determined prospectively from test results | Low: determined prospectively from blood results | Low: determined prospectively from blood results | Low: determined prospectively from blood results                            | High: relies on medical diagnosis of chronic renal disease in medical records.     | High: relies on medical diagnosis of chronic renal disease in insurance claims |
| <b>Information bias: exposure</b>                                 |                                                                                |                                                                                |                                                                                        |                                                                                                         |                                                                                |                                                 |                                                  |                                                  |                                                                             |                                                                                    |                                                                                |
| Recall bias <sup>5</sup>                                          | Low:                                                                           | Low: kidney                                                                    | High:                                                                                  | Low: determined                                                                                         | Low: kidney                                                                    | Low:                                            | Low:                                             | Low:                                             | Low:                                                                        | Low: kidney                                                                        | Low:                                                                           |

|                            |                                                                                     |                                                                                                                                        |                                                                                                                         |                                                                                                     |                                                                                                                                                                                  |                                                                       |                                                                                                                             |                                                                                                             |                                                           |                                                                                                        |                                                                          |
|----------------------------|-------------------------------------------------------------------------------------|----------------------------------------------------------------------------------------------------------------------------------------|-------------------------------------------------------------------------------------------------------------------------|-----------------------------------------------------------------------------------------------------|----------------------------------------------------------------------------------------------------------------------------------------------------------------------------------|-----------------------------------------------------------------------|-----------------------------------------------------------------------------------------------------------------------------|-------------------------------------------------------------------------------------------------------------|-----------------------------------------------------------|--------------------------------------------------------------------------------------------------------|--------------------------------------------------------------------------|
|                            | kidney disease diagnosis ascertained from pre-existing medical records              | disease diagnosis ascertained from pre-existing medical records                                                                        | ascertained medical diagnosis of kidney disease in participant interview in hospital for cases and at home for controls | from serum creatinine with clear cut-off (objective measure)                                        | disease diagnosis ascertained from pre-existing medical records                                                                                                                  | determined prospectively from test results.                           | determined prospectively from blood results.                                                                                | determined prospectively from blood results.                                                                | determined prospectively from blood results.              | disease diagnosis ascertained from pre-existing medical records                                        | kidney disease diagnosis ascertained from pre-existing insurance records |
| Observer bias <sup>6</sup> | Low: used pre-specified codes to define kidney disease status                       | Uncertain: Medical record abstractors not blinded to case-control status and criteria for assigning kidney disease status not reported | High: interviewers aware of case status (interviewed in hospital) or control status (telephone interview at home)       | Low: determined from serum creatinine with clear cut-off (objective measure)                        | Uncertain: source of kidney disease status data not reported. If hospital records are used, decision to list diagnosis in discharge record made in context of illness for cases. | Low: determined from blood and urine test results (objective measure) | Low: determined from serum creatinine (objective measure)                                                                   | Low: determined from serum creatinine (objective measure)                                                   | Low: determined from serum creatinine (objective measure) | High: decision to list diagnosis of kidney disease in case report made in context of illness for cases | Low: used pre-specified codes to define kidney disease status            |
| Ascertainment <sup>7</sup> | Low: chronic kidney disease diagnosis would have to predate current acute infection | Low: chronic kidney disease diagnosis would have to predate current acute infection                                                    | Low: chronic kidney disease diagnosis would have to predate current acute infection                                     | Uncertain: not reported when creatinine measured, or whether this is recurrent/ prompted by illness | Uncertain: source of kidney disease status data not reported. If hospital records used, patients with infection-related hospitalisation                                          | Low: participants monitored annually.                                 | Low: baseline measure used (that only patients with a result were eligible was considered a limitation to generalisability) | Low: sensitivity analysis using only the baseline creatinine test found similar results to the last-carried | Low: all participants tested at baseline.                 | High: ascertainment entirely different for cases than non-cases                                        | Low: kidney disease status ascertained in year prior to study            |



1  
2  
3  
4  
5  
6  
7  
8  
9  
10  
11  
12  
13  
14  
15  
16  
17  
18  
19  
20  
21  
22  
23  
24  
25  
26  
27  
28  
29  
30  
31  
32  
33  
34  
35  
36  
37  
38  
39  
40  
41  
42  
43  
44  
45  
46  
47  
48  
49

|                                                                   |                                                                                                          |                                                                         |                                                                                     |                                                                                                              |                                                                                                    |                                                                                                    |                                                                     |                                                                                                    |                                                                                                                                                 |                                                                                                               |                                                                                                    |
|-------------------------------------------------------------------|----------------------------------------------------------------------------------------------------------|-------------------------------------------------------------------------|-------------------------------------------------------------------------------------|--------------------------------------------------------------------------------------------------------------|----------------------------------------------------------------------------------------------------|----------------------------------------------------------------------------------------------------|---------------------------------------------------------------------|----------------------------------------------------------------------------------------------------|-------------------------------------------------------------------------------------------------------------------------------------------------|---------------------------------------------------------------------------------------------------------------|----------------------------------------------------------------------------------------------------|
|                                                                   |                                                                                                          |                                                                         |                                                                                     |                                                                                                              | ns more likely to have CKD status recorded.                                                        |                                                                                                    |                                                                     | forward method                                                                                     |                                                                                                                                                 |                                                                                                               |                                                                                                    |
| <b>Non-differential misclassification of outcome</b> <sup>8</sup> | Low: medical diagnosis of severe outcome                                                                 | Low: active surveillance with clear criteria                            | Low: severe outcome with clear criteria                                             | Uncertain: methods for ascertaining infection not reported                                                   | Low: severe outcome with widely accepted clinical criteria                                         | Low: severe outcome with widely accepted clinical criteria                                         | Low: severe outcome with clear criteria                             | Low: severe outcome with widely accepted clinical criteria                                         | Uncertain: kidney disease status may affect healthcare attendance for minor illness such as UTI                                                 | Uncertain: sending of PCR test during influenza pandemic vulnerable to be influenced by kidney disease status | Low: severe outcome unlikely to be missed                                                          |
| <b>Information bias: outcome</b>                                  |                                                                                                          |                                                                         |                                                                                     |                                                                                                              |                                                                                                    |                                                                                                    |                                                                     |                                                                                                    |                                                                                                                                                 |                                                                                                               |                                                                                                    |
| Recall bias <sup>9</sup>                                          | Low: cases identified from medical records based on GP diagnosis                                         | Low: cases identified by laboratory surveillance                        | Low: cases determined by medical diagnosis in hospital                              | Uncertain: methods for ascertaining infection not reported                                                   | Low: monitoring of all hospital discharge reports                                                  | Low: monitoring of all hospital discharge reports                                                  | Low: monitoring of all biochemistry results                         | Low: monitoring of all hospital discharge reports                                                  | Low: annual clinician interviews supplemented with medical record review                                                                        | Low: realtime case finding system through laboratory results                                                  | Low: monitoring of all hospital insurance claims                                                   |
| Observer bias <sup>10</sup>                                       | Low: clinical diagnosis of severe outcome unlikely to be severely affected by kidney disease comorbidity | Low: Laboratory based surveillance system with clear criteria for cases | Low: CKD status unlikely to severely affect physician application of clear criteria | Uncertain: standard definition of APN is vague and not reported whether any observer blinded to renal status | Low: kidney disease status unlikely to affect choice of hospital diagnosis code for severe outcome | Low: kidney disease status unlikely to affect choice of hospital diagnosis code for severe outcome | Low: objective definition of outcome independent of exposure status | Low: kidney disease status unlikely to affect choice of hospital diagnosis code for severe outcome | Low: kidney disease status unlikely to strongly influence diagnosis of UTI at age 86-89 years, given case criteria include symptoms and urinary | Low: objective criteria for cases once tested                                                                 | Low: kidney disease status unlikely to affect choice of hospital diagnosis code for severe outcome |

|                                 |                                                                                                                                 |                                                                                                                                                                           |                                                                                       |                                                                                                 |                                                                                                                  |                                                                                       |                                                                                                        |                                                                                                             |                                                                                                 |                                                                                                       |                                                                                       |
|---------------------------------|---------------------------------------------------------------------------------------------------------------------------------|---------------------------------------------------------------------------------------------------------------------------------------------------------------------------|---------------------------------------------------------------------------------------|-------------------------------------------------------------------------------------------------|------------------------------------------------------------------------------------------------------------------|---------------------------------------------------------------------------------------|--------------------------------------------------------------------------------------------------------|-------------------------------------------------------------------------------------------------------------|-------------------------------------------------------------------------------------------------|-------------------------------------------------------------------------------------------------------|---------------------------------------------------------------------------------------|
|                                 |                                                                                                                                 |                                                                                                                                                                           |                                                                                       |                                                                                                 |                                                                                                                  |                                                                                       |                                                                                                        |                                                                                                             | analysis                                                                                        |                                                                                                       |                                                                                       |
| Ascertainment <sup>11</sup>     | Low: kidney disease status unlikely to affect primary care attendance with severe outcome                                       | Low: active surveillance with clear criteria, testing for IPD unlikely to be markedly influenced by CKD status in context of known high incidence among the Navajo Nation | Low: kidney disease status unlikely to affect hospital attendance with severe outcome | Uncertain: methods for ascertaining infection not reported                                      | Low: kidney disease status unlikely to affect diagnosis of severe outcome with widely accepted clinical criteria | Low: kidney disease status unlikely to affect hospital attendance with severe outcome | Low: sending of blood culture unlikely to be influenced by kidney disease in context of severe illness | Low: kidney disease status unlikely to affect diagnosis of severe outcome with widely accepted clinical     | Uncertain: kidney disease status may affect healthcare attendance for minor illness such as UTI | Uncertain: sending of PCR test during influenza pandemic vulnerable to be influenced by comorbidities | Low: kidney disease status unlikely to affect hospital attendance with severe outcome |
| Confounding <sup>12</sup>       | Low: controls matched to cases on age and sex, estimate adjusted for wide range of confounders including diabetes <sup>13</sup> | Low: controls matched for age and sex. Diabetes eligible for inclusion in final model <sup>14</sup>                                                                       | Low: Age, sex and diabetes eligible for inclusion in final model <sup>15</sup>        | High: unadjusted estimate. In particular, high immunosuppressant use among the study population | Low: adjusted for age, sex, nature of index event, charlson index, healthcare use, and other comorbidities       | High: no adjustment for sex <sup>16</sup>                                             | Low: adjusted for age, sex, diabetes, comorbidity score, care in a dedicated renal clinic              | Low: adjusted for age, sex, socio-economic status, ethnicity, diabetes mellitus, Charlson comorbidity score | High: no adjustment for sex or diabetes <sup>17</sup>                                           | High: adjusted for age only                                                                           | High: unadjusted <sup>19</sup>                                                        |
| Reverse causation <sup>18</sup> | Low: pre-existing kidney disease reported at time of infection                                                                  | Low: pre-existing kidney disease reported at time of infection                                                                                                            | Low: pre-existing kidney disease reported at time of infection                        | Uncertain: Timing of creatinine measurement relative to infections not specified                | Low: chronic renal failure should not be diagnosed within one hospital episode for infection                     | Low: serum biochemistry tested at screening                                           | Low: baseline creatinine used                                                                          | Low: only followed to first outcome event, creatinine result predates qualifying                            | Low: baseline creatinine used                                                                   | Low: pre-existing kidney disease reported at time of infection                                        | Low: kidney disease status established in year prior to study                         |

|  |  |  |  |  |  |  |  |           |  |  |  |
|--|--|--|--|--|--|--|--|-----------|--|--|--|
|  |  |  |  |  |  |  |  | infection |  |  |  |
|--|--|--|--|--|--|--|--|-----------|--|--|--|

\*The unusual design of the artificial cohort study by Campbell *et al.* is worth clarification. During the 2009–2010 influenza pandemic, hospitalised cases of laboratory confirmed pandemic influenza A (H1N1) were reported by a laboratory-based national surveillance system. The surveillance report, completed by the microbiologist, asked whether the case had a diagnosis of CKD. Denominators for infection rates were obtained from primary care registers of patients eligible for pandemic influenza vaccination by virtue of a CKD diagnosis (for CKD): and from the national census (for non-CKD).<sup>(29)</sup> The effect of CKD on influenza may be overestimated in this study, because CKD was advertised as a possible risk factor for pandemic influenza to encourage vaccine uptake among this group, and patients with flu-like symptoms could have been more likely to attend hospital or be tested for pandemic influenza A (H1N1) if they had a diagnosis of CKD.

1. High risk: probability of selection as a control likely to be affected by kidney disease status (known or unknown).  
Low risk: controls selected using random sampling (or other system unlikely to be biased by kidney disease status) from the population from which the cases arose.
2. Low risk: (1) automated participation (e.g. medical record review), or (2)  $\geq 80\%$  participation, or (3) 70-80% participation with a comparison (min age, sex, death/morbidity) showing similar characteristics between those included and those not included in the study.
3. Low risk: (1) automated follow up (e.g. through record linkage), or (2)  $\geq 80\%$  follow up, or (3) 70-80% follow up with a comparison (min age, sex, death/morbidity) showing similar characteristics between those included and those not included in the study.
4. High risk: allocation of kidney disease status relies on existing kidney disease having been diagnosed as part of routine medical care.  
Low risk: All members of study assessed for kidney disease at baseline.
5. High risk: kidney disease status defined by patient recall of CKD diagnosis in context of recent infection.
6. High risk: kidney disease status defined by observer unblinded to case status, without clear objective criteria to apply.
7. High risk: participants with infections are more or less likely to be tested for kidney disease.
8. Low risk: Active screening for infection, or severe outcome unlikely to be missed or presents validation results of  $>70\%$  sensitivity and specificity
9. High risk: infection status defined by patient recall of infection in context of kidney disease e.g. participants with kidney disease asked to recall infections while at renal clinic.
10. High risk: infection status defined by observer in context likely to be influenced by kidney disease status (assumed that clinical diagnosis of severe infections was unlikely to be strongly influenced by awareness of CKD as a comorbidity but that less severe infections may be influenced by this in the absence of clear diagnostic criteria).
11. High risk: ascertainment of infections likely to be influenced by kidney disease status (assumed that attendance to healthcare facility for severe infections was unlikely to be strongly influenced by awareness of CKD as a comorbidity but that attendance for less severe infections may be influenced by this in the absence of active surveillance).

- 1  
2  
3  
4  
5 12. Low risk: At least age, sex and diabetes must have been eligible and considered for the final model.  
6  
7 13. Controls matched to cases on age at index data (within 1 year), sex, general practice, and calendar time. Estimate adjusted for smoking status,  
8 Townsend deprivation score, use of influenza vaccine in previous 12 months, use of pneumococcal vaccine in previous 5 years, number of years of medical  
9 records data available in database, and comorbidities including: diabetes, chronic heart disease, chronic respiratory disease, asplenia, cerebrospinal shunt,  
10 chronic liver disease, sickle cell disease or coeliac disease, cochlear implant, HIV/AIDS, immunosuppression, stroke or transient ischaemic attack,  
11 rheumatoid arthritis, Parkinson's disease, multiple sclerosis, dementia, osteoporosis, and any cancer.  
12  
13 14. Controls matched for age and sex. Diabetes eligible for inclusion in final model, which was adjusted for age, pneumococcal vaccine, congestive heart  
14 failure, alcohol use, BMI and unemployment.  
15  
16 15. Age, sex and diabetes eligible for inclusion in final model. Final model adjusted for age, non-English language at home, living in a detached house, living  
17 alone, congestive heart failure, chronic obstructive pulmonary disease, dysphagia, Barthel index of functional status, immunosuppressive medications,  
18 nutritional score, tobacco use, alcohol use, and exposure to fumes.  
19  
20 16. The best adjusted estimate for urinary sepsis is adjusted for asymptomatic bacteriuria and age, and restricted to diabetics, but not adjusted for sex.  
21  
22 17. High risk: age-restricted and stratified by long term care facility (LCTF) residency, but no management of confounding by sex or co-morbidities.  
23  
24 18. High risk: exposure defined after the infection defined as the study outcome.  
25  
26 19. Rate ratios for hospitalisation with UTI, pneumonia and bacteraemia/ sepsis unadjusted. Rate ratios for hospitalisation with any infection calculated as  
27 the ratio of the rate among participants with CKD, compared with no CKD, each rate having been adjusted for gender, prior hospitalisation, ASHD, CHF, CVA,  
28 PVD, dysrhythmia, other cardiac disease, diabetes, COPD, hypertension, liver disease, gastrointestinal disease, cancer, and anemia.  
29  
30  
31  
32  
33  
34  
35  
36  
37  
38  
39  
40  
41  
42  
43  
44  
45  
46  
47  
48  
49

**Supplementary Figure 1:** Funnel plot showing the relationship between relative risk and standard error for the 12 estimates from all nine studies included in meta-analysis (all infections combined)

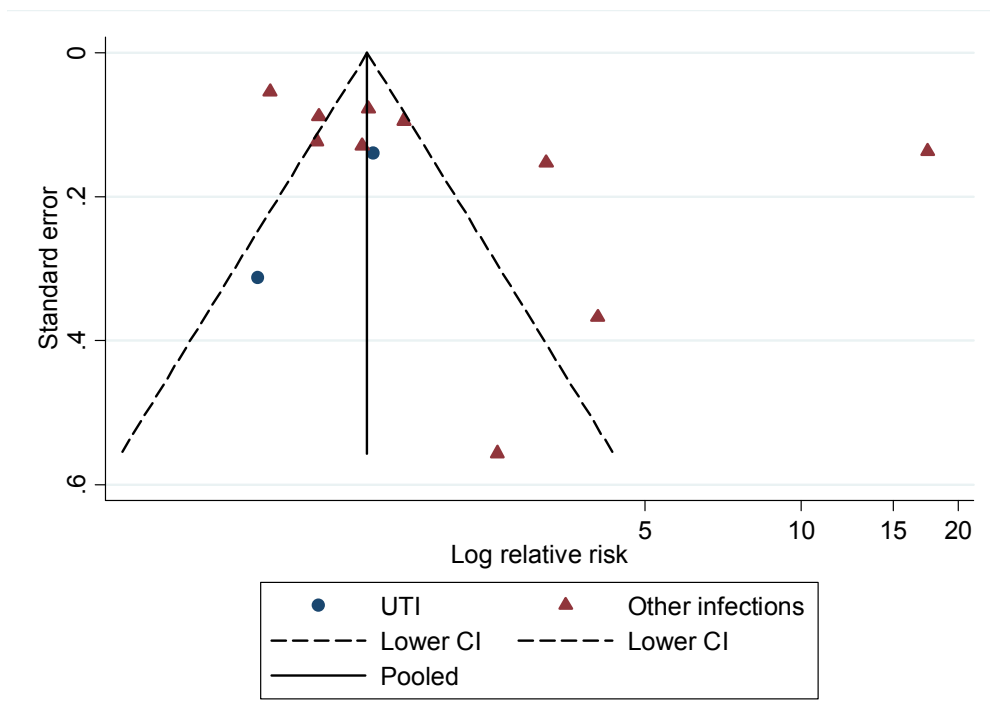

UTI = urinary tract infection

Other infections comprised lower respiratory tract infections and sepsis.

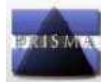

# PRISMA 2009 Checklist

| Section/topic                      | #  | Checklist item                                                                                                                                                                                                                                                                                              | Reported on page #     |
|------------------------------------|----|-------------------------------------------------------------------------------------------------------------------------------------------------------------------------------------------------------------------------------------------------------------------------------------------------------------|------------------------|
| <b>TITLE</b>                       |    |                                                                                                                                                                                                                                                                                                             |                        |
| Title                              | 1  | Identify the report as a systematic review, meta-analysis, or both.                                                                                                                                                                                                                                         | 1                      |
| <b>ABSTRACT</b>                    |    |                                                                                                                                                                                                                                                                                                             |                        |
| Structured summary                 | 2  | Provide a structured summary including, as applicable: background; objectives; data sources; study eligibility criteria, participants, and interventions; study appraisal and synthesis methods; results; limitations; conclusions and implications of key findings; systematic review registration number. | 2                      |
| <b>INTRODUCTION</b>                |    |                                                                                                                                                                                                                                                                                                             |                        |
| Rationale                          | 3  | Describe the rationale for the review in the context of what is already known.                                                                                                                                                                                                                              | 6                      |
| Objectives                         | 4  | Provide an explicit statement of questions being addressed with reference to participants, interventions, comparisons, outcomes, and study design (PICOS).                                                                                                                                                  | 7                      |
| <b>METHODS</b>                     |    |                                                                                                                                                                                                                                                                                                             |                        |
| Protocol and registration          | 5  | Indicate if a review protocol exists, if and where it can be accessed (e.g., Web address), and, if available, provide registration information including registration number.                                                                                                                               | 8                      |
| Eligibility criteria               | 6  | Specify study characteristics (e.g., PICOS, length of follow-up) and report characteristics (e.g., years considered, language, publication status) used as criteria for eligibility, giving rationale.                                                                                                      | 8 and Appendix Table 4 |
| Information sources                | 7  | Describe all information sources (e.g., databases with dates of coverage, contact with study authors to identify additional studies) in the search and date last searched.                                                                                                                                  | 8                      |
| Search                             | 8  | Present full electronic search strategy for at least one database, including any limits used, such that it could be repeated.                                                                                                                                                                               | Appendix Tables 1-3    |
| Study selection                    | 9  | State the process for selecting studies (i.e., screening, eligibility, included in systematic review, and, if applicable, included in the meta-analysis).                                                                                                                                                   | 8                      |
| Data collection process            | 10 | Describe method of data extraction from reports (e.g., piloted forms, independently, in duplicate) and any processes for obtaining and confirming data from investigators.                                                                                                                                  | 7                      |
| Data items                         | 11 | List and define all variables for which data were sought (e.g., PICOS, funding sources) and any assumptions and simplifications made.                                                                                                                                                                       | 7                      |
| Risk of bias in individual studies | 12 | Describe methods used for assessing risk of bias of individual studies (including specification of whether this was done at the study or outcome level), and how this information is to be used in any data synthesis.                                                                                      | 9                      |
| Summary measures                   | 13 | State the principal summary measures (e.g., risk ratio, difference in means).                                                                                                                                                                                                                               | 9                      |

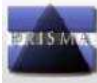

# PRISMA 2009 Checklist

|                      |    |                                                                                                                                                           |    |
|----------------------|----|-----------------------------------------------------------------------------------------------------------------------------------------------------------|----|
| Synthesis of results | 14 | Describe the methods of handling data and combining results of studies, if done, including measures of consistency (e.g., $I^2$ ) for each meta-analysis. | 10 |
|----------------------|----|-----------------------------------------------------------------------------------------------------------------------------------------------------------|----|

Page 1 of 2

| Section/topic                 | #  | Checklist item                                                                                                                                                                                           | Reported on page #       |
|-------------------------------|----|----------------------------------------------------------------------------------------------------------------------------------------------------------------------------------------------------------|--------------------------|
| Risk of bias across studies   | 15 | Specify any assessment of risk of bias that may affect the cumulative evidence (e.g., publication bias, selective reporting within studies).                                                             | 10                       |
| Additional analyses           | 16 | Describe methods of additional analyses (e.g., sensitivity or subgroup analyses, meta-regression), if done, indicating which were pre-specified.                                                         | 10                       |
| <b>RESULTS</b>                |    |                                                                                                                                                                                                          |                          |
| Study selection               | 17 | Give numbers of studies screened, assessed for eligibility, and included in the review, with reasons for exclusions at each stage, ideally with a flow diagram.                                          | 12 and figure 1          |
| Study characteristics         | 18 | For each study, present characteristics for which data were extracted (e.g., study size, PICOS, follow-up period) and provide the citations.                                                             | 12 and Table 1           |
| Risk of bias within studies   | 19 | Present data on risk of bias of each study and, if available, any outcome level assessment (see item 12).                                                                                                | 14 and Table 2           |
| Results of individual studies | 20 | For all outcomes considered (benefits or harms), present, for each study: (a) simple summary data for each intervention group (b) effect estimates and confidence intervals, ideally with a forest plot. | 13 and Figure 2          |
| Synthesis of results          | 21 | Present results of each meta-analysis done, including confidence intervals and measures of consistency.                                                                                                  | 13 and Figure 2          |
| Risk of bias across studies   | 22 | Present results of any assessment of risk of bias across studies (see Item 15).                                                                                                                          | 14 and Appendix Figure 1 |
| Additional analysis           | 23 | Give results of additional analyses, if done (e.g., sensitivity or subgroup analyses, meta-regression [see Item 16]).                                                                                    | 13                       |
| <b>DISCUSSION</b>             |    |                                                                                                                                                                                                          |                          |
| Summary of evidence           | 24 | Summarize the main findings including the strength of evidence for each main outcome; consider their relevance to key groups (e.g., healthcare providers, users, and policy makers).                     | 22                       |
| Limitations                   | 25 | Discuss limitations at study and outcome level (e.g., risk of bias), and at review-level (e.g., incomplete retrieval of identified research, reporting bias).                                            | 22,24                    |
| Conclusions                   | 26 | Provide a general interpretation of the results in the context of other evidence, and implications for future research.                                                                                  | 25-26                    |
| <b>FUNDING</b>                |    |                                                                                                                                                                                                          |                          |

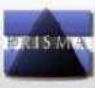

# PRISMA 2009 Checklist

1  
2  
3  
4  
5  
6  
7  
8  
9  
10  
11  
12  
13  
14  
15  
16  
17  
18  
19  
20  
21  
22  
23  
24  
25  
26  
27  
28  
29  
30  
31  
32  
33  
34  
35  
36  
37  
38  
39  
40  
41  
42  
43  
44  
45  
46  
47  
48  
49

|         |    |                                                                                                                                            |    |
|---------|----|--------------------------------------------------------------------------------------------------------------------------------------------|----|
| Funding | 27 | Describe sources of funding for the systematic review and other support (e.g., supply of data); role of funders for the systematic review. | 31 |
|---------|----|--------------------------------------------------------------------------------------------------------------------------------------------|----|

From: Moher D, Liberati A, Tetzlaff J, Altman DG, The PRISMA Group (2009). Preferred Reporting Items for Systematic Reviews and Meta-Analyses: The PRISMA Statement. PLoS Med 6(6): e1000097. doi:10.1371/journal.pmed1000097

For more information, visit: [www.prisma-statement.org](http://www.prisma-statement.org).

Page 2 of 2

For peer review only





**Chronic kidney disease as a risk factor for acute community-acquired infections: a systematic review**

|                                 |                                                                                                                                                                                                |
|---------------------------------|------------------------------------------------------------------------------------------------------------------------------------------------------------------------------------------------|
| Journal:                        | <i>BMJ Open</i>                                                                                                                                                                                |
| Manuscript ID:                  | bmjopen-2013-004100.R1                                                                                                                                                                         |
| Article Type:                   | Research                                                                                                                                                                                       |
| Date Submitted by the Author:   | 11-Feb-2014                                                                                                                                                                                    |
| Complete List of Authors:       | McDonald, Helen; London School of Hygiene & Tropical Medicine, Non-Communicable Disease Epidemiology<br>Thomas, Sara; London School of Hygiene & Tropical Medicine,<br>Nitsch, Dorothea; LSHTM |
| <b>Primary Subject Heading</b>: | Epidemiology                                                                                                                                                                                   |
| Secondary Subject Heading:      | Public health, Infectious diseases, General practice / Family practice, Renal medicine                                                                                                         |
| Keywords:                       | Epidemiology < INFECTIOUS DISEASES, Nephrology < INTERNAL MEDICINE, Chronic renal failure < NEPHROLOGY, PRIMARY CARE                                                                           |
|                                 |                                                                                                                                                                                                |

SCHOLARONE™  
Manuscripts

1  
2  
3 **Title: Chronic kidney disease as a risk factor for acute community-acquired infections:**  
4 **a systematic review**  
5  
6

7  
8 **Authors:** Helen I McDonald,<sup>1</sup> Sara L Thomas,<sup>2</sup> Dorothea Nitsch.<sup>1</sup>  
9

10  
11 1. Department of Non-communicable Disease Epidemiology, London School of Hygiene &  
12 Tropical Medicine, Keppel Street, London, UK.  
13

14  
15 2. Department of Infectious Disease Epidemiology, London School of Hygiene & Tropical  
16 Medicine, Keppel Street, London, UK.  
17  
18

19  
20  
21  
22 **Corresponding author:**  
23

24  
25 Helen I McDonald  
26

27  
28 Faculty of Epidemiology and Population Health, London School of Hygiene & Tropical  
29 Medicine, Keppel Street, London, UK WC1E 7HT. Tel: +44 (0)20 7636 8636 ext 2247. Fax:  
30  
31 N/A. E-mail: [helen.mcdonald@lshtm.ac.uk](mailto:helen.mcdonald@lshtm.ac.uk)  
32  
33

34  
35  
36 **Keywords:** Community-acquired infections, Chronic Renal Insufficiency, Systematic review,  
37 Risk factors.  
38

39  
40  
41  
42 **Word counts:**  
43

44  
45 Abstract: 246 words  
46

47  
48 Body: 3,134 words  
49  
50  
51  
52  
53  
54  
55  
56  
57  
58  
59  
60

**ABSTRACT:**

**Objectives:** A systematic review of the association of pre-dialysis chronic kidney disease (CKD) with the incidence of acute, community-acquired infections.

**Design:** We searched Medline, Embase and Cochrane databases (inception to 16/01/2014) for studies analysing the association of pre-dialysis kidney disease with the incidence of acute, community-acquired urinary tract infection (UTI), lower respiratory tract or central nervous system infections, or sepsis. Studies were required to include at least 30 participants with and without kidney disease.

**Setting & participants:** Community-based populations of adults in high income countries.

**Outcome measures:** Acute, community-acquired urinary tract infection (UTI), lower respiratory tract or central nervous system infections, or sepsis.

**Results:** We identified 14 eligible studies. Estimates from two studies lacked 95% confidence intervals and standard errors. The remaining 12 studies yielded 17 independent effect estimates. Only three studies included infections managed in the community. Quality assessment revealed that probable misclassification of kidney disease status and poor adjustment for confounding were common. There was evidence from a few large high quality studies of a graded association between pre-dialysis CKD stage and hospitalisation for infection. One study found an interaction with age, with a declining effect of CKD on infection risk as age increased. There was evidence of between-studies heterogeneity ( $I^2=96.5%$ ,  $p<0.001$ ) which persisted in subgroup analysis, and thus meta-analysis was not performed.

1  
2  
3  
4  
5  
6  
7  
8  
9  
10  
11  
12  
13  
14  
15  
16  
17  
18  
19  
20  
21  
22  
23  
24  
25  
26  
27  
28  
29  
30  
31  
32  
33  
34  
35  
36  
37  
38  
39  
40  
41  
42  
43  
44  
45  
46  
47  
48  
49  
50  
51  
52  
53  
54  
55  
56  
57  
58  
59  
60

**Conclusions:** Pre-dialysis kidney disease appears to be associated with increased risk of severe infection. Whether pre-dialysis kidney disease increases the susceptibility to infections and whether age modifies this association remains unclear.

For peer review only

## ARTICLE SUMMARY

### Article focus:

- This review sought to assess systematically whether pre-dialysis chronic kidney disease (CKD) is a risk factor for the incidence of acute, community-acquired urinary tract infection (UTI), lower respiratory tract infection (LRTI) central nervous system (CNS) infection, or sepsis, among community-based adults in high income countries.
- Any increased risk of infection incidence at early stages of CKD would affect a large and growing number of patients. Awareness and quantification of this risk could have benefits for patient management, more effective vaccination strategies and healthcare planning.

### Key messages:

- We identified major gaps in the literature including: a scarcity of high-quality studies on this research topic; a lack of studies using less severe outcome measures than hospitalisation, to allow any association of CKD with susceptibility to infection to be distinguished from an association with severity of infection; and a lack of data on the relationship between proteinuria and infection incidence independently of glomerular filtration rate.
- All studies were consistent with a positive association between CKD and infection risk.

### Strengths and limitations of this study:

- This study used a sensitive search strategy, with a broad definition of kidney disease, for a thorough and inclusive search.

1  
2  
3  
4  
5  
6  
7  
8  
9  
10  
11  
12  
13  
14  
15  
16  
17  
18  
19  
20  
21  
22  
23  
24  
25  
26  
27  
28  
29  
30  
31  
32  
33  
34  
35  
36  
37  
38  
39  
40  
41  
42  
43  
44  
45  
46  
47  
48  
49  
50  
51  
52  
53  
54  
55  
56  
57  
58  
59  
60

- Between-study heterogeneity, and the low quality of many of the studies, limit interpretation of results of the studies currently available.

For peer review only

## INTRODUCTION

Chronic kidney disease (CKD) is common, and its prevalence is increasing.[1] Infection is a major cause of mortality in end-stage renal disease (ESRD) and hospitalisation at all stages of CKD. The second commonest cause of death among ESRD patients in the US is septicaemia, and patients with ESRD are at increased risk of death from infection compared to the general population.[2-4] Both ESRD and pre-dialysis patients with CKD in the US are at higher risk of hospitalisation for infection than the general population.[2, 5-6] Pre-dialysis CKD has been found to increase mortality among patients hospitalised with infections.[7]

Increased mortality and hospitalisation from infection could be driven by increased severity of infection, i.e. once an infection is present, the course of the associated illness is more severe, or increased incidence, i.e. CKD may make people more susceptible to develop an infection. Patients with CKD display impaired host immunity: reduced vaccination responsiveness is observed at all stages of CKD.[8]

Among ESRD patients, aspects of dialysis, such as vascular and peritoneal access for dialysis, may be a risk factor for infection incidence and severity. However, this does not tell the whole story, and only 23% of infection-related hospitalisations among haemodialysis patients in the US were identified as related to vascular access in the HEMO study.[9] Risk factors for infection identified among ESRD patients which are not related to renal replacement therapy, and could apply at all stages of pre-dialysis CKD, include: the causes and treatment of kidney disease; co-morbidities; reduced vaccine effectiveness; and high levels of exposure to health care facilities.[10]

If there is an increased risk of infection incidence at early stages of CKD, this would affect a large and growing number of patients. Awareness and quantification of this risk could have

1  
2  
3 benefits for patient management, more effective vaccination strategies and healthcare  
4  
5 planning.  
6  
7

8 Narrative reviews have concluded that it is likely that CKD in itself increases infection  
9  
10 incidence, but reported a lack of evidence.[10-12] We are not aware of any relevant  
11  
12 systematic literature reviews of the effect of CKD on infection incidence.  
13  
14

15  
16 This review sought to assess systematically whether pre-dialysis CKD is a risk factor for the  
17  
18 incidence of acute, community-acquired urinary tract infection (UTI), lower respiratory tract  
19  
20 infection (LRTI) central nervous system (CNS) infection, or sepsis, among community-based  
21  
22 adults in high income countries.  
23  
24  
25  
26  
27  
28  
29  
30  
31  
32  
33  
34  
35  
36  
37  
38  
39  
40  
41  
42  
43  
44  
45  
46  
47  
48  
49  
50  
51  
52  
53  
54  
55  
56  
57  
58  
59  
60



## METHODS

### Data Sources and Searches

One reviewer (HM) searched the Medline and Embase databases, and the Cochrane library, from inception to 16 January 2014. The search strategies combined text words and MeSH terms for three concepts: acute community-acquired infection (either sepsis, UTI, LRTI or CNS infection); kidney disease; and relative risk. We used search terms to identify studies among adult humans in high-income countries (according to the World Bank classification),[13] and limited the search to articles in English, French or German. The full strategies are available in **Supplementary Tables 1-3**.

We searched the reference lists of all included studies and any pertinent review articles to identify further eligible studies.

### Study Selection

One reviewer (HM) screened titles and abstracts, reviewed the full-text of identified studies and made initial decisions on eligibility according to pre-specified inclusion criteria (**Supplementary Table 4**). Any borderline cases were discussed between HM, DN and ST. A second reviewer (DN) checked a sample of 100 abstracts, selected randomly after de-duplication of records, and a kappa statistic was calculated to describe agreement in selection of studies.

Eligible studies analysed the effect of pre-dialysis kidney disease on the relative risk of at least one of the four specified acute, community-acquired infections among community-based adults in high-income countries. We excluded study populations managed in secondary

1  
2  
3 care (unless for kidney disease), routinely treated with immunosuppressants, or exclusively of  
4  
5 pregnant women, as these groups have a raised risk of infection, and the relationship of CKD  
6  
7 to infection risk may be different among these groups compared to that in the general adult  
8  
9 population in primary care.  
10

11  
12 To maximise the sensitivity of our search strategy, we accepted a wide range of definitions of  
13  
14 kidney disease, including: medical diagnosis of kidney disease, reduced estimated  
15  
16 glomerular filtration rate or creatinine clearance, elevated creatinine, proteinuria, micro- or  
17  
18 macro-albuminuria, and renal structural abnormalities. We also accepted definitions which  
19  
20 included some patients with ESRD among the patients with CKD, but excluded definitions  
21  
22 which were exclusively patients receiving renal replacement therapy.  
23  
24

25  
26  
27 Outcomes of interest were relative risk estimates of acute community-acquired LRTIs, UTIs,  
28  
29 CNS infections or sepsis. We accepted outcomes describing incidence of severe infections  
30  
31 (such as hospitalisation with pneumonia).  
32  
33

34  
35 We restricted our search to published studies which were sufficiently large to include at least  
36  
37 30 participants with and without kidney disease, to allow reasonable precision of the study  
38  
39 estimate. Detailed eligibility criteria are listed in **Supplementary Table 4**.  
40  
41

#### 42 **Data Extraction and Quality Assessment**

43  
44  
45 Data were extracted from relevant studies using a pre-specified collection form. Study  
46  
47 characteristics extracted included study design, data source, any participant exclusion criteria,  
48  
49 number of participants, age, gender, baseline renal function, definition of renal impairment,  
50  
51 definition of the outcome infection. An estimate of relative risk (rate ratio, risk ratio or odds  
52  
53 ratio) with any measures taken to address confounding was extracted from each eligible  
54  
55 independent analysis in each study. Studies with no confidence intervals and for which the  
56  
57  
58  
59  
60

1  
2  
3 standard error was not calculable from the data presented were included in the review but not  
4  
5 considered for meta-analysis.  
6  
7

8  
9 When multiple estimates were available from a study but were not independent, a single  
10  
11 estimate was identified for potential meta-analysis by selecting the estimate best adjusted for  
12  
13 confounding, using the most recent data, comparing the level of CKD most common in the  
14  
15 general population with no CKD.  
16  
17

18  
19 Study quality was assessed using a pre-specified tool adapted from Higgins *et al.* for  
20  
21 observational studies.[14] Studies were assigned a high, low or uncertain risk of each of:  
22  
23 selection bias, non-differential measurement error for exposure and outcome, information  
24  
25 bias in exposure and outcome, confounding and reverse causation. The minimum requirement  
26  
27 for a low risk of bias from confounding was appropriate management of confounding by age,  
28  
29 sex and diabetes. Specific criteria used are detailed in **Supplementary Table 5**.  
30  
31

### 32 **Data Synthesis and Analysis**

33  
34  
35  
36 The relationship between CKD and UTIs was considered likely to differ from that of CKD to  
37  
38 other infections, due to potential reverse causality. For example, repeat UTIs may cause  
39  
40 kidney disease, or structural kidney disease may be identified through investigation of repeat  
41  
42 UTIs. Therefore in all quantitative analysis, UTIs were analysed separately from other  
43  
44 infections.  
45  
46

47  
48 Estimates were examined for heterogeneity using Cochran's Q statistic and the  $I^2$  statistic as  
49  
50 described by Higgins *et al.*[15] If  $I^2$  was less than 50% and Cochran's Q statistic  $p \geq 0.1$ ,  
51  
52 fixed-effects meta-analysis was considered for each of the two categories (UTI, and other  
53  
54 infections). Funnel plots were constructed to look for publication bias. All analysis was  
55  
56 conducted using STATA version 12.0.  
57  
58  
59  
60

## RESULTS

The database searches identified 10,380 citations, of which 1,204 were duplicates (**Figure 1**).

Both reviewers had 100% agreement on which studies to extract for full-text analysis from screening a random sample of 100 abstracts (Cohen's  $K=1$ ).

We identified 14 eligible studies, with varying study characteristics (**Table 1**). Four studies were case-control studies,[16-19] and ten were cohort studies.[20-29] Seven studies investigated a range of risk factors for infection,[16-19, 21, 28-29] two studies reported the effect of CKD on infection as a confounder of the effect of interest,[24-25] and five studies investigated the effect of CKD on infection risk as their primary research question.[5, 20, 22, 26-27]

Seven studies were based among the general population.[5, 16, 19, 21, 23, 28-29] Other study populations included: attendants at a specialist renal clinic,[22] patients with diabetes mellitus,[25] patients admitted to hospital for an acute cardiovascular event or an arterial revascularisation procedure, [24] and the Navajo Nation – a population which experiences 3–5 times higher rates of invasive pneumococcal disease than the general US population.[17] The population of the cohort studies in Calgary, Canada were adults with a serum creatinine test result available in their medical records.[26-27] There is some overlap in the study populations of these two cohort studies: residents aged over 65 years with a serum creatinine measurement between 1 July 2001 and 31 December 2001 and also between 1 July 2003 and 30 June 2004 would have been included in both studies for the period from the second creatinine measurement until 31 December 2004.[26-27]

Definitions of kidney disease included medical diagnoses of chronic renal disease, elevated creatinine levels, impaired creatinine clearance, and structural abnormalities of the kidney.

Five studies excluded patients with ESRD, and one specified the number included, but for the

1  
2  
3 remaining eight studies it was unclear how many of the included patients received renal  
4  
5 replacement therapy (**Table 1**).

6  
7  
8 Three studies recorded infections diagnosed in primary care or outpatients,[16, 19, 29] two  
9  
10 recorded infections identified from a positive culture result,[17, 26] one included infections  
11  
12 diagnosed in the emergency department,[18] seven required hospital admission for  
13  
14 infection,[5, 21, 23-25, 27-28] and for one study the definition and severity of infection was  
15  
16 unclear.[22]

17  
18  
19 For two studies, the results extracted had no confidence interval or standard error and these  
20  
21 could not be calculated from the reported data. From the remaining 12 studies, 17  
22  
23 independent effect estimates with standard errors were available for meta-analysis, among  
24  
25 which UTI was the outcome in three estimates.

26  
27  
28 For all infections there was strong evidence of considerable heterogeneity (Cochran's Q  
29  
30 statistic  $p < 0.001$ ,  $I^2 = 96.5\%$ ). This persisted when estimates for UTIs were excluded  
31  
32 ( $p < 0.001$ ,  $I^2 = 97.2\%$ ), when considering LRTIs alone ( $p < 0.001$ ,  $I^2 = 98.2\%$ ), when limited to  
33  
34 cohort studies ( $p < 0.001$ ,  $I^2 = 97.3\%$ ), and when stratified by exclusion of patients with ESRD  
35  
36 (ESRD excluded,  $p < 0.001$ ,  $I^2 = 88.9\%$ ; ESRD not excluded  $p < 0.001$ ,  $I^2 = 97.2\%$ ). Due to this  
37  
38 heterogeneity, meta-analysis was not performed.

39  
40  
41 All results are displayed in the Forest plot (**Figure 2**). Despite the quantitative heterogeneity,  
42  
43 the results were qualitatively similar: all estimates were compatible with a positive  
44  
45 association between kidney disease and infection. The four studies which compared different  
46  
47 stages of CKD found a graded association of increased risk of infection with more severe  
48  
49 CKD. These studies all excluded patients with end-stage renal disease.[22-23, 26-27] One  
50  
51 study found that the effect of CKD on infection risk was modified by age, with a declining  
52  
53 effect of CKD on infection risk as age increased.[27] This effect was consistent with the  
54  
55  
56  
57  
58  
59  
60

1  
2  
3 lower effect of CKD on UTI incidence found among 86–90 year olds (0.90, 95% CI 0.50–  
4  
5 1.77) compared with an adult study population with a mean age of 66 years (1.50, 95% CI  
6  
7 1.10–1.90).[25, 29]  
8  
9

10 The funnel plot was sparsely populated, with widely scattered effect estimates, and provides  
11  
12 no clear evidence for or against publication bias (**Supplementary Figure 1**).  
13  
14

15  
16 Study quality was variable. Relying on routine medical diagnosis introduced a potential  
17  
18 source of misclassification of kidney disease status for seven studies.[5, 16-19, 21, 24] There  
19  
20 was variable adjustment for confounding, from unadjusted crude estimates to estimates  
21  
22 adjusted for a range of comorbidities, demographic and socio-economic factors. Six studies  
23  
24 did not meet this review's minimal requirements.[19, 21-22, 25, 28-29] The summarised  
25  
26 results are displayed in **Table 2**, and the full quality assessment is in **Supplementary Table**  
27  
28  
29 **5**.  
30  
31  
32  
33  
34  
35  
36  
37  
38  
39  
40  
41  
42  
43  
44  
45  
46  
47  
48  
49  
50  
51  
52  
53  
54  
55  
56  
57  
58  
59  
60

Table 1: Characteristics of eligible studies (n=14)

| Case-control studies             |             |                                 |                                                                                                                       |                       |                                    |                                                                      |                               |                                                                                                                                   |                                                    |                           |                   |                                          |
|----------------------------------|-------------|---------------------------------|-----------------------------------------------------------------------------------------------------------------------|-----------------------|------------------------------------|----------------------------------------------------------------------|-------------------------------|-----------------------------------------------------------------------------------------------------------------------------------|----------------------------------------------------|---------------------------|-------------------|------------------------------------------|
|                                  | Study       |                                 |                                                                                                                       | Kidney disease        |                                    |                                                                      | Infection                     |                                                                                                                                   |                                                    | Kidney disease prevalence |                   | Odds ratio (95% CI)                      |
|                                  | Date        | Setting                         | Population<br>Age<br>% Female                                                                                         | Defined               | ESRD included                      | Ascertained                                                          | Type                          | Defined                                                                                                                           | Ascertained                                        | Cases                     | Controls          |                                          |
| Vinogradova 2009 <sup>[16]</sup> | 1996 - 2005 | UK                              | General population<br><br>Any age<br>Median age band 45-64 years<br><br>Cases 49.3%, controls 49.1%                   | Chronic renal disease | Unclear                            | Primary care medical record diagnosis code in previous 5 years       | Pneumonia                     | Medical diagnosis recorded in primary care records                                                                                | READ code in primary care medical records          | 203/17,172 (1.2%)         | 386/71,299 (0.5%) | 1.72 (1.3 – 2.07) <sup>1</sup>           |
| Watt 2007 <sup>[17]</sup>        | 1999 - 2002 | The Navajo Nation<br><br>USA    | Navajo adults<br><br>≥18 years<br><br>Summary age and sex n/r                                                         | Chronic renal failure | 17 participants receiving dialysis | Medical record abstraction                                           | Invasive pneumococcal disease | S.pneumoniae isolated from a normally sterile body fluid during illness                                                           | Active laboratory surveillance system <sup>2</sup> | 20/118 (16.9%)            | 12/353 (3.4%)     | 2.6 (0.87 – 7.7) <sup>3</sup><br>P=0.087 |
| Loeb 2009 <sup>[18]</sup>        | 2002 - 2005 | Ontario & Alberta<br><br>Canada | General population<br><br>≥ 65 years<br>Mean age: cases 79.1, controls 74.4 years.<br><br>Cases 39.6%, controls 68.5% | Renal disease         | Unclear                            | Cases: hospital interview.<br>Controls: telephone interview at home. | Pneumonia                     | Consistent chest X-ray and ≥2 of: chest pain, shortness of breath, productive cough, temperature >38°C, crackles on auscultation. | Recruited patients attending emergency departments | 127/690 (18.4%)           | 38/82 (4.4%)      | 4.06 (1.98–8.35) <sup>4</sup><br>P<0.001 |
| Schnoor                          | 2002        | Germany                         | General                                                                                                               | Chronic               | Unclear                            | Cases:                                                               | Pneumonia                     | (1) Infiltrate on chest                                                                                                           | Community-                                         | 49/1128                   | 27/1044           | 1.7 (1.1–2.8)                            |

|                      |           |  |                                                                                                                   |               |  |                                                                          |  |                                                                                                                                                                                                             |                                                                                         |        |        |                        |
|----------------------|-----------|--|-------------------------------------------------------------------------------------------------------------------|---------------|--|--------------------------------------------------------------------------|--|-------------------------------------------------------------------------------------------------------------------------------------------------------------------------------------------------------------|-----------------------------------------------------------------------------------------|--------|--------|------------------------|
| 2007 <sup>[19]</sup> | –<br>2005 |  | population<br>>18 years<br>Mean age:<br>cases 57,<br>controls 57.5<br>years<br><br>Cases 44.8%,<br>controls 54.7% | renal disease |  | reporting<br>physician.<br>Controls: self-<br>reported<br>questionnaire. |  | X-ray or (2)<br>temperature $\geq 38.3^{\circ}\text{C}$<br>with any of: cough,<br>purulent sputum,<br>positive auscultation.<br>Excluded if<br>hospitalised within<br>prior 4 weeks, or<br>immunodeficient. | acquired<br>pneumonia<br>network<br>registry reports<br>(primary and<br>secondary care) | (4.3%) | (2.6%) | (unadjusted)<br>P<0.05 |
|----------------------|-----------|--|-------------------------------------------------------------------------------------------------------------------|---------------|--|--------------------------------------------------------------------------|--|-------------------------------------------------------------------------------------------------------------------------------------------------------------------------------------------------------------|-----------------------------------------------------------------------------------------|--------|--------|------------------------|

**Cohort studies**

|                                | Study       |                                      |                                                                                                                                   | Kidney disease                                                           |          |                     | Comparison group                                             | Infection                      |                                                                                                    |                                                                                      | Risk or rate ratio (95% CI)  |                               |
|--------------------------------|-------------|--------------------------------------|-----------------------------------------------------------------------------------------------------------------------------------|--------------------------------------------------------------------------|----------|---------------------|--------------------------------------------------------------|--------------------------------|----------------------------------------------------------------------------------------------------|--------------------------------------------------------------------------------------|------------------------------|-------------------------------|
|                                | Date        | Setting<br><br>Follow up time        | Population Number<br>Age<br>Sex                                                                                                   | Defined Number with kidney disease                                       | ESRD     | Ascertained         | Defined                                                      | Type                           | Defined                                                                                            | Ascertained                                                                          |                              |                               |
| Higgins 1989 <sup>[22]</sup>   | 1985        | Oxford UK<br><br>1 year              | Patients attending a Renal Unit with chronic renal failure<br><br>n=211<br><br>17-77 years<br>Mean 50.5 years<br><br>% female n/r | Creatinine $\geq 250 \mu\text{mol/l}$<br><br>Number n/r                  | Excluded | Serum creatinine    | Creatinine $< 250 \mu\text{mol/l}$                           | UTI                            | $> 10^5$ organism/ml and $\geq 10$ leucocytes /hpf in clean catch urine specimen                   | Medical record review                                                                | Creatinine $\mu\text{mol/l}$ |                               |
|                                |             |                                      |                                                                                                                                   |                                                                          |          |                     |                                                              |                                |                                                                                                    |                                                                                      | <250                         | 1                             |
|                                |             |                                      |                                                                                                                                   |                                                                          |          |                     |                                                              |                                |                                                                                                    |                                                                                      | 250-500                      | 1.5 <sup>5</sup>              |
|                                |             |                                      |                                                                                                                                   |                                                                          |          |                     |                                                              |                                |                                                                                                    |                                                                                      | >500                         | 2 <sup>5</sup>                |
| Dalrymple 2012 <sup>[23]</sup> | 1989 – 2007 | United States<br><br>Mean 11.5 years | General community-dwelling population <sup>6</sup><br><br>n=5,142<br><br>>65 years<br>Mean 72 years                               | Baseline eGFR $< 90 \text{ mL/min/1.73 m}^2$ <sup>7</sup><br><br>n=3,863 | Excluded | Baseline cystatin C | Baseline eGFR $\geq 90 \text{ mL/min/1.73 m}^2$ <sup>7</sup> | Pulmonary<br><br>Genitourinary | Hospital admission with a principal discharge diagnosis of the relevant infection (ICD-9-CM codes) | Medical record review following patient report of hospital admission in cohort study | eGFR $\text{mL/min/1.73m}^2$ |                               |
|                                |             |                                      |                                                                                                                                   |                                                                          |          |                     |                                                              |                                |                                                                                                    |                                                                                      | $\geq 90$                    | 1                             |
|                                |             |                                      |                                                                                                                                   |                                                                          |          |                     |                                                              |                                |                                                                                                    |                                                                                      | 60–89                        | 1.22 (0.99–1.54) <sup>8</sup> |
|                                |             |                                      |                                                                                                                                   |                                                                          |          |                     |                                                              |                                |                                                                                                    |                                                                                      | 45–59                        | 1.27 (0.94–1.71) <sup>8</sup> |
|                                |             |                                      |                                                                                                                                   |                                                                          |          |                     |                                                              |                                |                                                                                                    |                                                                                      | 15–44                        | 1.81 (1.25–2.63) <sup>8</sup> |
|                                |             |                                      |                                                                                                                                   |                                                                          |          |                     |                                                              |                                |                                                                                                    |                                                                                      | $\geq 90$                    | 1                             |
|                                |             |                                      |                                                                                                                                   |                                                                          |          |                     |                                                              |                                |                                                                                                    |                                                                                      | 60–89                        | 1.08 (0.75–1.56) <sup>8</sup> |
|                                |             |                                      |                                                                                                                                   |                                                                          |          |                     |                                                              |                                |                                                                                                    |                                                                                      | 45–59                        | 1.17 (0.67–2.05) <sup>8</sup> |
|                                |             |                                      |                                                                                                                                   |                                                                          |          |                     |                                                              |                                |                                                                                                    |                                                                                      | 15–44                        | 2.63 (1.40–4.96) <sup>8</sup> |



|                                                  |                               |                                          |                                                                                                |                                                                      |          |                                                                                |                                                            |                                       |                                                                                                                       |                                      |                                                                                                                                                                                                                                                                                                                                                                                                                                                                                                                                         |                                 |             |                                          |                                              |         |                                          |                                |                               |                                |                                                  |          |                                        |
|--------------------------------------------------|-------------------------------|------------------------------------------|------------------------------------------------------------------------------------------------|----------------------------------------------------------------------|----------|--------------------------------------------------------------------------------|------------------------------------------------------------|---------------------------------------|-----------------------------------------------------------------------------------------------------------------------|--------------------------------------|-----------------------------------------------------------------------------------------------------------------------------------------------------------------------------------------------------------------------------------------------------------------------------------------------------------------------------------------------------------------------------------------------------------------------------------------------------------------------------------------------------------------------------------------|---------------------------------|-------------|------------------------------------------|----------------------------------------------|---------|------------------------------------------|--------------------------------|-------------------------------|--------------------------------|--------------------------------------------------|----------|----------------------------------------|
|                                                  |                               |                                          | 61% female                                                                                     |                                                                      |          |                                                                                |                                                            | Bacteremia and sepsis                 |                                                                                                                       |                                      | <table border="1"> <tr> <td>≥90</td> <td>1</td> </tr> <tr> <td>60–89</td> <td>1.10 (0.77–1.58)<sup>8</sup></td> </tr> <tr> <td>45–59</td> <td>1.55 (0.93–2.57)<sup>8</sup></td> </tr> <tr> <td>15–44</td> <td>0.77 (0.29–2.03)<sup>8</sup></td> </tr> </table>                                                                                                                                                                                                                                                                          | ≥90                             | 1           | 60–89                                    | 1.10 (0.77–1.58) <sup>8</sup>                | 45–59   | 1.55 (0.93–2.57) <sup>8</sup>            | 15–44                          | 0.77 (0.29–2.03) <sup>8</sup> |                                |                                                  |          |                                        |
| ≥90                                              | 1                             |                                          |                                                                                                |                                                                      |          |                                                                                |                                                            |                                       |                                                                                                                       |                                      |                                                                                                                                                                                                                                                                                                                                                                                                                                                                                                                                         |                                 |             |                                          |                                              |         |                                          |                                |                               |                                |                                                  |          |                                        |
| 60–89                                            | 1.10 (0.77–1.58) <sup>8</sup> |                                          |                                                                                                |                                                                      |          |                                                                                |                                                            |                                       |                                                                                                                       |                                      |                                                                                                                                                                                                                                                                                                                                                                                                                                                                                                                                         |                                 |             |                                          |                                              |         |                                          |                                |                               |                                |                                                  |          |                                        |
| 45–59                                            | 1.55 (0.93–2.57) <sup>8</sup> |                                          |                                                                                                |                                                                      |          |                                                                                |                                                            |                                       |                                                                                                                       |                                      |                                                                                                                                                                                                                                                                                                                                                                                                                                                                                                                                         |                                 |             |                                          |                                              |         |                                          |                                |                               |                                |                                                  |          |                                        |
| 15–44                                            | 0.77 (0.29–2.03) <sup>8</sup> |                                          |                                                                                                |                                                                      |          |                                                                                |                                                            |                                       |                                                                                                                       |                                      |                                                                                                                                                                                                                                                                                                                                                                                                                                                                                                                                         |                                 |             |                                          |                                              |         |                                          |                                |                               |                                |                                                  |          |                                        |
| Hackam 2006 <sup>[24]</sup>                      | 1997 - 2002                   | Ontario Canada<br>Mean 2.2 years         | Patients with cardiovascular disease<br>n=69,168<br>>65 years<br>Mean 74.1 years<br>44% female | Chronic renal insufficiency<br>n=7,169                               | Unclear  | Health record databases <sup>9</sup>                                           | No chronic renal insufficiency                             | Sepsis                                | Hospital admission with a diagnosis of sepsis <sup>10</sup>                                                           | Health record database <sup>11</sup> | 1.47 (1.27–1.72) <sup>12</sup>                                                                                                                                                                                                                                                                                                                                                                                                                                                                                                          |                                 |             |                                          |                                              |         |                                          |                                |                               |                                |                                                  |          |                                        |
| Karunajeewa 2005 <sup>[25]</sup>                 | 1999 - 2000                   | Western Australia<br>Mean 2.9 years      | Patients with diabetes<br>n=496<br>>10 years<br>Mean 66.1 years <sup>13</sup><br>46.2% female  | Albuminuria; serum urea; serum creatinine                            | Unclear  | Baseline urinary albumin: creatinine ratio (ACR), serum urea, serum creatinine | Hazard ratio per 2.72-fold increase in ACR or serum urea   | Urinary sepsis and non-urinary sepsis | Hospitalisation diagnosis codes (principal diagnosis, or principal or secondary diagnosis) <sup>14</sup>              | Health record database <sup>15</sup> | <table border="1"> <tr> <td>Urinary sepsis (principal code)</td> <td>Ln(ACR)</td> <td>1.5 (1.1 – 1.9)<sup>16</sup><br/>p=0.004</td> </tr> <tr> <td>Urinary sepsis (principal or secondary code)</td> <td>Ln(ACR)</td> <td>1.3 (1.1 – 1.6)<sup>17</sup><br/>p=0.005</td> </tr> <tr> <td>Non-urinary sepsis (principal)</td> <td>Ln(ACR)</td> <td>1.4(1.1-1.9)<sup>16</sup></td> </tr> <tr> <td>Non-urinary sepsis (principal or secondary code)</td> <td>Ln(urea)</td> <td>4.6 (2.3-9.4)<sup>16</sup><br/>p&lt;0.001</td> </tr> </table> | Urinary sepsis (principal code) | Ln(ACR)     | 1.5 (1.1 – 1.9) <sup>16</sup><br>p=0.004 | Urinary sepsis (principal or secondary code) | Ln(ACR) | 1.3 (1.1 – 1.6) <sup>17</sup><br>p=0.005 | Non-urinary sepsis (principal) | Ln(ACR)                       | 1.4(1.1-1.9) <sup>16</sup>     | Non-urinary sepsis (principal or secondary code) | Ln(urea) | 4.6 (2.3-9.4) <sup>16</sup><br>p<0.001 |
| Urinary sepsis (principal code)                  | Ln(ACR)                       | 1.5 (1.1 – 1.9) <sup>16</sup><br>p=0.004 |                                                                                                |                                                                      |          |                                                                                |                                                            |                                       |                                                                                                                       |                                      |                                                                                                                                                                                                                                                                                                                                                                                                                                                                                                                                         |                                 |             |                                          |                                              |         |                                          |                                |                               |                                |                                                  |          |                                        |
| Urinary sepsis (principal or secondary code)     | Ln(ACR)                       | 1.3 (1.1 – 1.6) <sup>17</sup><br>p=0.005 |                                                                                                |                                                                      |          |                                                                                |                                                            |                                       |                                                                                                                       |                                      |                                                                                                                                                                                                                                                                                                                                                                                                                                                                                                                                         |                                 |             |                                          |                                              |         |                                          |                                |                               |                                |                                                  |          |                                        |
| Non-urinary sepsis (principal)                   | Ln(ACR)                       | 1.4(1.1-1.9) <sup>16</sup>               |                                                                                                |                                                                      |          |                                                                                |                                                            |                                       |                                                                                                                       |                                      |                                                                                                                                                                                                                                                                                                                                                                                                                                                                                                                                         |                                 |             |                                          |                                              |         |                                          |                                |                               |                                |                                                  |          |                                        |
| Non-urinary sepsis (principal or secondary code) | Ln(urea)                      | 4.6 (2.3-9.4) <sup>16</sup><br>p<0.001   |                                                                                                |                                                                      |          |                                                                                |                                                            |                                       |                                                                                                                       |                                      |                                                                                                                                                                                                                                                                                                                                                                                                                                                                                                                                         |                                 |             |                                          |                                              |         |                                          |                                |                               |                                |                                                  |          |                                        |
| James 2008 <sup>[26]</sup>                       | 2001 - 2004                   | Calgary Canada<br>Mean 3.2 years         | General population<br>n=25,675<br>>65 years<br>Mean by eGFR <sup>18</sup><br>55.9% female      | Baseline eGFR<60 mL/min/1.73 m <sup>2</sup> <sup>19</sup><br>n=6,941 | Excluded | Calgary Laboratory Services records                                            | Baseline eGFR ≥60 mL/min/1.73 m <sup>2</sup> <sup>19</sup> | Bloodstream infection                 | Any pathogenic organism isolated from ≥1 blood cultures submitted from the community or ≤2 days of hospital admission | Calgary Laboratory Services records  | <table border="1"> <tr> <td>eGFR mL/min/1.73m<sup>2</sup></td> <td>≥60</td> <td>1</td> </tr> <tr> <td></td> <td>45-59</td> <td>1.17 (0.92–1.49)<sup>20</sup></td> </tr> <tr> <td></td> <td>30-44</td> <td>1.60 (1.20–2.13)<sup>20</sup></td> </tr> <tr> <td></td> <td>&lt;30</td> <td>2.95 (2.11–4.14)<sup>20</sup></td> </tr> </table>                                                                                                                                                                                                 | eGFR mL/min/1.73m <sup>2</sup>  | ≥60         | 1                                        |                                              | 45-59   | 1.17 (0.92–1.49) <sup>20</sup>           |                                | 30-44                         | 1.60 (1.20–2.13) <sup>20</sup> |                                                  | <30      | 2.95 (2.11–4.14) <sup>20</sup>         |
| eGFR mL/min/1.73m <sup>2</sup>                   | ≥60                           | 1                                        |                                                                                                |                                                                      |          |                                                                                |                                                            |                                       |                                                                                                                       |                                      |                                                                                                                                                                                                                                                                                                                                                                                                                                                                                                                                         |                                 |             |                                          |                                              |         |                                          |                                |                               |                                |                                                  |          |                                        |
|                                                  | 45-59                         | 1.17 (0.92–1.49) <sup>20</sup>           |                                                                                                |                                                                      |          |                                                                                |                                                            |                                       |                                                                                                                       |                                      |                                                                                                                                                                                                                                                                                                                                                                                                                                                                                                                                         |                                 |             |                                          |                                              |         |                                          |                                |                               |                                |                                                  |          |                                        |
|                                                  | 30-44                         | 1.60 (1.20–2.13) <sup>20</sup>           |                                                                                                |                                                                      |          |                                                                                |                                                            |                                       |                                                                                                                       |                                      |                                                                                                                                                                                                                                                                                                                                                                                                                                                                                                                                         |                                 |             |                                          |                                              |         |                                          |                                |                               |                                |                                                  |          |                                        |
|                                                  | <30                           | 2.95 (2.11–4.14) <sup>20</sup>           |                                                                                                |                                                                      |          |                                                                                |                                                            |                                       |                                                                                                                       |                                      |                                                                                                                                                                                                                                                                                                                                                                                                                                                                                                                                         |                                 |             |                                          |                                              |         |                                          |                                |                               |                                |                                                  |          |                                        |
| James 2009 <sup>[27]</sup>                       | 2003 -                        | Calgary Canada                           | General population                                                                             | Time updated                                                         | Excluded | Calgary Laboratory                                                             | eGFR 60-104 mL/min/1.73                                    | Pneumonia                             | ICD-10 code for pneumonia any                                                                                         | Hospital discharge                   | <table border="1"> <tr> <td>eGFR mL/min/1.73m<sup>2</sup></td> <td>18-54 years</td> </tr> </table>                                                                                                                                                                                                                                                                                                                                                                                                                                      | eGFR mL/min/1.73m <sup>2</sup>  | 18-54 years |                                          |                                              |         |                                          |                                |                               |                                |                                                  |          |                                        |
| eGFR mL/min/1.73m <sup>2</sup>                   | 18-54 years                   |                                          |                                                                                                |                                                                      |          |                                                                                |                                                            |                                       |                                                                                                                       |                                      |                                                                                                                                                                                                                                                                                                                                                                                                                                                                                                                                         |                                 |             |                                          |                                              |         |                                          |                                |                               |                                |                                                  |          |                                        |

1  
2  
3  
4  
5  
6  
7  
8  
9  
10  
11  
12  
13  
14  
15  
16  
17  
18  
19  
20  
21  
22  
23  
24  
25  
26  
27  
28  
29  
30  
31  
32  
33  
34  
35  
36  
37  
38  
39  
40  
41  
42  
43  
44  
45  
46  
47  
48  
49

|                           |             |                                |                                                                                                                                                       |                                                                  |         |                           |                                                            |        |                                                                                                             |                                                                                |                                                                                                                                                                                                                                                                                                                                                                                                                                                                                                                                                                                                                                    |
|---------------------------|-------------|--------------------------------|-------------------------------------------------------------------------------------------------------------------------------------------------------|------------------------------------------------------------------|---------|---------------------------|------------------------------------------------------------|--------|-------------------------------------------------------------------------------------------------------------|--------------------------------------------------------------------------------|------------------------------------------------------------------------------------------------------------------------------------------------------------------------------------------------------------------------------------------------------------------------------------------------------------------------------------------------------------------------------------------------------------------------------------------------------------------------------------------------------------------------------------------------------------------------------------------------------------------------------------|
|                           | 2006        | Median 2.5 years               | n=252,516<br>≥18 years<br>Mean by eGFR <sup>21</sup><br><br>42.3% female                                                                              | eGFR<60 mL/min/1.73 m <sup>2</sup> <sup>22</sup><br><br>n=35,948 |         | Services records          | m <sup>2</sup> <sup>22</sup>                               |        | position in hospital discharge report                                                                       | reports                                                                        | 60-104   1<br>45-59   3.23 (2.40–4.36) <sup>23</sup><br>30-44   9.67 (6.36–14.69) <sup>23</sup><br><30   15.04 (9.64–23.47) <sup>23</sup><br>Age 55 – 64 years<br>60-104   1<br>45-59   1.43 (1.11–1.84) <sup>23</sup><br>30-44   1.94 (1.32–2.87) <sup>23</sup><br><30   5.50 (3.83–7.92) <sup>23</sup><br>Age 65 – 74 years<br>60-104   1<br>45-59   1.18 (0.99–1.40) <sup>23</sup><br>30-44   2.24 (1.84–2.73) <sup>23</sup><br><30   3.23 (2.52–4.13) <sup>23</sup><br>Age ≥75 years<br>60-104   1<br>45-59   0.95 (0.85–1.05) <sup>23</sup><br>30-44   1.03 (0.92–1.16) <sup>23</sup><br><30   1.79 (1.55–2.06) <sup>23</sup> |
| Wang 2012 <sup>[28]</sup> | 2003 – 2011 | United States<br>Mean .7 years | General population sample (weighted by age, geography and ethnicity) <sup>24</sup><br><br>n=30,239<br><br>≥45 years<br>69%>60 years<br><br>55% female | Baseline eGFR<60 mL/min/1.73 m <sup>2</sup> <sup>25</sup>        | Unclear | Baseline serum creatinine | Baseline eGFR ≥60 mL/min/1.73 m <sup>2</sup> <sup>25</sup> | Sepsis | Among hospitalisations attributed by participants to serious infection, medical record review <sup>26</sup> | Initially reported by study participants, confirmed with medical record review | 1.99 (1.73–2.29) <sup>27</sup>                                                                                                                                                                                                                                                                                                                                                                                                                                                                                                                                                                                                     |

|                               |             |                        |                                                                                           |                                                      |          |                                                                                                          |                                              |                            |                                                                                                             |                                                                                                   |                                       |                   |
|-------------------------------|-------------|------------------------|-------------------------------------------------------------------------------------------|------------------------------------------------------|----------|----------------------------------------------------------------------------------------------------------|----------------------------------------------|----------------------------|-------------------------------------------------------------------------------------------------------------|---------------------------------------------------------------------------------------------------|---------------------------------------|-------------------|
| Caljouw 2011 <sup>[29]</sup>  | 1998 - 2004 | Leiden The Netherlands | General population<br>n= 479<br>86-90 years<br>All aged 86 years at entry<br>67.2% female | Creatinine clearance <30mL/min <sup>28</sup><br>n=43 | Unclear  | Baseline serum creatinine                                                                                | Creatinine clearance ≥30mL/min <sup>28</sup> | UTI                        | Diagnosed by treating physician based on signs, symptoms and urine analysis; or death records <sup>29</sup> | Physician interview and medical record review.<br>Statistics Netherlands for cause of death data. | 0.9 (0.5–1.7) (unadjusted)<br>p=0.794 |                   |
| Campbell 2011 <sup>[21]</sup> | 2009 - 2010 | England UK             | General population<br>n=43.9 million<br>6 months - 64 years<br>Summary age and sex n/r    | Chronic kidney disease<br>n=182,000                  | Unclear  | Cases: consultant microbiologist report.<br>Denominator: primary care population estimate. <sup>30</sup> | No pre-existing conditions <sup>30</sup>     | Pandemic influenza A(H1N1) | Polymerase chain reaction (PCR) test confirmation of pandemic influenza A (H1N1) from a hospital inpatient. | Consultant microbiologist report to national surveillance system.                                 | 17.5 (13.4 – 22.9) <sup>31</sup>      |                   |
| USRDS 2010 <sup>[20]</sup>    | 2008        | USA                    | Medicare patients 66+ years<br>1 year <sup>32</sup>                                       | Chronic kidney disease                               | Excluded | Insurance database ICD-9_CM codes <sup>33</sup>                                                          | No CKD                                       | Pneumonia                  | Principal cause of hospital admission using hospital insurance claim records                                | ICD-9-CM codes 480-486                                                                            | 2.76 (unadjusted)                     |                   |
|                               |             |                        |                                                                                           |                                                      |          |                                                                                                          |                                              | UTI                        |                                                                                                             |                                                                                                   | ICD-9-CM codes <sup>34</sup>          | 3.15 (unadjusted) |
|                               |             |                        |                                                                                           |                                                      |          |                                                                                                          |                                              | Bacteraemia/septicaemia    |                                                                                                             |                                                                                                   | ICD-9-CM codes 038.0 – 038.9          | 3.90 (unadjusted) |

95% CI = 95% confidence interval; n/r = not reported; CKD= chronic kidney disease; UTI = urinary tract infection

1. Controls matched to cases on age at index data (within 1 year), sex, general practice, and calendar time. Estimate adjusted for smoking status, Townsend deprivation score, use of influenza vaccine in previous 12 months, use of pneumococcal vaccine in previous 5 years, number of years of medical records data available in database, and comorbidities including: diabetes, chronic heart disease, chronic respiratory disease, asplenia, cerebrospinal shunt, chronic liver disease, sickle cell disease or coeliac disease, cochlear implant, HIV/AIDS, immunosuppression, stroke or transient ischaemic attack, rheumatoid arthritis, Parkinson’s disease, multiple sclerosis, dementia, osteoporosis, and any cancer.
2. Center for American Indian Health surveillance system.

3. Cases and controls matched by gender and age group. Adjusted for age, receipt of pneumococcal polysaccharide vaccine, congestive heart failure, alcohol use, body mass index and unemployment.
4. Adjusted for age, non-English language spoken most at home, living in detached house, living alone, congestive heart failure, chronic obstructive pulmonary disease, dysphagia, functional status using Barthel Index, immunosuppressive medications, nutritional score, tobacco use (lifetime history and secondhand smoke), alcohol consumption and history of regular exposure to gases, fumes or chemicals at home, or at work.
5. Approximate numbers, read from bar graph in publication. No confidence intervals available.
6. Cohort selected for the Cardiovascular Health Study. Exclusion criteria included: inability to provide informed consent or communicate with the interviewer, institutionalisation, being homebound, receipt of hospice care, treatment with radiation or chemotherapy for cancer, or plans to move out of the community within 3 years.
7. Serum cystatin C measured by particle-enhanced immunonephelometric assay, and eGFR calculated using:  $eGFR=6.7 \times CysC^{-1.19}$ .
8. Adjusted for age, sex, race, tobacco use, body mass index, diabetes mellitus, coronary heart disease, stroke, heart failure, cancer, chronic obstructive pulmonary disease, serum albumin, C-reactive protein, interleukin-6.
9. Canadian Institute for Health Information Discharge Abstract database or Ontario Health Insurance Plan database
10. ICD-9 codes 003 1, 036 2 and 038 0 – 038 9.
11. Canadian Institute for Health Information Discharge Abstract database.
12. Adjusted for statins, age, sex, nature of index event, charlson index, healthcare use, malignant disease, chemotherapy, neutropaenia, diabetes mellitus, oral steroids, antineoplastics, other immunosuppressants, history of aspiration, structural lung disease, previous infection (respiratory, GI, skin/soft tissue or other), recent trauma, transplant recipient, heart failure, stroke, chronic liver disease, chronic obstructive pulmonary disease, alcoholism, dementia, Parkinson's disease. Statin and non-statin users matched using propensity scoring for the above factors.
13. Mean age among the 460 participants without asymptomatic bacteriuria, 66.1years (SD11.0): mean age among the 36 participants with asymptomatic bacteriuria, 67.7 years (SD 10.5).
14. ICD-9 or ICD-10 codes for urinary sepsis were those encoding UTI, cystitis, pyelonephritis, orchitis, epididymitis and prostatitis; codes for non-urinary sepsis were those for sepsis, septicaemia and/or abscess.
15. Western Australia Data Linkage System.
16. Adjusted for presence of asymptomatic bacteriuria.
17. Adjusted for presence of asymptomatic bacteriuria and age.
18. Mean age  $\pm$ SD by eGFR.  $\geq 60$ : 74.4 $\pm$ 6.5years. 45-59: 77.5 $\pm$ 7.2 years. 30-44: 79.3 $\pm$ 7.4years.  $<30$ : 78.6 $\pm$ 7.4 years.
19. eGFR calculated using abbreviated Modification of Diet in Renal Disease Study equation (omitting ethnicity) from single outpatient serum creatinine result.
20. Adjusted for age, sex, diabetes mellitus, comorbidity score and care in a CKD clinic.
21. Mean age  $\pm$ SD by eGFR.  $\geq 105$ : 38.7 $\pm$ 14.6. 60-104: 50.9 $\pm$ 15.4. 45-59: 67.0 $\pm$  14.1. 30-44: 74.5 $\pm$ 12.9.  $<30$ : 73.3 $\pm$ 15.2.
22. eGFR calculated using abbreviated Modification of Diet in Renal Disease Study equation (omitting ethnicity) from most recent outpatient serum creatinine result.
23. Adjusted for age, sex, socio-economic status, ethnicity, diabetes mellitus, Charlson comorbidity score.
24. Cohort selected for the Reasons for Geographic and Racial Differences in Stroke (REGARDS) study. Population weighted by age, ethnicity and geography according to local stroke incidence rates.
25. eGFR calculated using CKD-EPI equation.

- 1  
2 26. Medical record review confirming (1) serious infection as major reason for admission and (2)  $\geq 2$  of heart rate  $>90$  beats/minute, temperature  $>38.3^{\circ}\text{C}$  or  $<36^{\circ}\text{C}$ , tachypnoea  
3  $>20$  breaths/minute or leucocytosis.  
4  
5 27. Adjusted for age, sex, race, education, income, geographic region, alcohol use and smoking status. 28. Creatinine clearance calculated from serum creatinine concentration  
6 and weight using Cockcroft-Gault formula.  
7 29. Cause of death recorded as UTI (ICD-10 code N39.0)/  
8 30. Department of Health-Health Protection Agency influenza vaccine uptake primary care monitoring system data.  
9 31. Adjusted for age.  
10 32. Smoothed estimate: Models include data from the stated year and the two years preceding it, applying weights of 1,  $\frac{1}{4}$  and  $\frac{1}{8}$  with increasing distance in time.  
11 33. ICD-9-CM diagnosis codes recorded in insurance claims during the preceding year: 585.1 – 585.5 (chronic kidney disease stages 1-5); or 585.6 with no ESRD 2728 form  
12 or other indication of ESRD.  
13 34. Principal hospital admission ICD-9-CM codes: 590-590.9, 595-595.4, 597-597.89, 598, 599.0, 601-601.9, 604-604.9, 607.1-2, 608.0, 608.4, 616.1, 616.3-4, and 616.8.  
14  
15  
16  
17  
18  
19  
20  
21  
22  
23  
24  
25  
26  
27  
28  
29  
30  
31  
32  
33  
34  
35  
36  
37  
38  
39  
40  
41  
42  
43  
44  
45  
46  
47  
48  
49

**Table 2: Summary of risk of bias within studies (quality assessment tool adapted from Higgins *et al.*)[14]**

|                                  | Selection bias:<br>control selection | Selection bias:<br>participation | Selection bias:<br>loss to follow up | Non-differential<br>misclassification:<br>Exposure | Information bias:<br>Exposure | Non-differential<br>misclassification:<br>Outcome | Information bias:<br>Outcome | Confounding | Reverse causation |
|----------------------------------|--------------------------------------|----------------------------------|--------------------------------------|----------------------------------------------------|-------------------------------|---------------------------------------------------|------------------------------|-------------|-------------------|
| <b>Case-control studies</b>      |                                      |                                  |                                      |                                                    |                               |                                                   |                              |             |                   |
| Vinogradova 2009 <sup>[16]</sup> |                                      |                                  | N/A                                  |                                                    |                               |                                                   |                              |             |                   |
| Watt 2007 <sup>[17]</sup>        |                                      |                                  | N/A                                  |                                                    |                               |                                                   |                              |             |                   |
| Loeb 2009 <sup>[18]</sup>        |                                      |                                  | N/A                                  |                                                    |                               |                                                   |                              |             |                   |
| Schnoor 2007 <sup>[19]</sup>     |                                      |                                  | N/A                                  |                                                    |                               |                                                   |                              |             |                   |
| <b>Cohort studies</b>            |                                      |                                  |                                      |                                                    |                               |                                                   |                              |             |                   |
| Higgins 1989 <sup>[22]</sup>     | N/A                                  | N/A                              |                                      |                                                    |                               |                                                   |                              |             |                   |
| Hackam 2006 <sup>[24]</sup>      | N/A                                  | N/A                              |                                      |                                                    |                               |                                                   |                              |             |                   |
| Dalrymple 2012 <sup>[23]</sup>   | N/A                                  | N/A                              |                                      |                                                    |                               |                                                   |                              |             |                   |
| Karunajeewa 2005 <sup>[25]</sup> | N/A                                  | N/A                              |                                      |                                                    |                               |                                                   |                              |             |                   |
| James 2008 <sup>[26]</sup>       | N/A                                  | N/A                              |                                      |                                                    |                               |                                                   |                              |             |                   |
| James 2009 <sup>[27]</sup>       | N/A                                  | N/A                              |                                      |                                                    |                               |                                                   |                              |             |                   |
| Wang 2012 <sup>[28]</sup>        | N/A                                  | N/A                              |                                      |                                                    |                               |                                                   |                              |             |                   |
| Caljouw 2011 <sup>[29]</sup>     | N/A                                  | N/A                              |                                      |                                                    |                               |                                                   |                              |             |                   |
| Campbell 2011 <sup>[21]</sup>    | N/A                                  | N/A                              |                                      |                                                    |                               |                                                   |                              |             |                   |
| USRDS 2010 <sup>[20]</sup>       | N/A                                  | N/A                              |                                      |                                                    |                               |                                                   |                              |             |                   |

**Key to table 2**

Low risk of bias

Uncertain risk of bias

High risk of bias

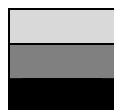

## DISCUSSION

Our comprehensive search strategy identified 14 studies describing an association between kidney disease and acute community-acquired infection. Although between-study heterogeneity precluded meta-analysis, all were consistent with a positive direction of association. The four studies which reported estimates on more than one category of kidney disease all found a graded association in which risk of infection increased with greater severity of CKD. These four studies all excluded patients with end-stage renal disease, and three were at low risk of bias in all categories of quality assessment.[22-23, 26-27]

To our knowledge, this is the first review to address this research question systematically. We used a sensitive search strategy, with a broad definition of kidney disease, for a thorough and inclusive search. The results are consistent with the conclusion of previous narrative reviews: that an association between CKD and infection incidence is likely, but that there is a paucity of evidence.[10-12]

Heterogeneity between the studies precluded meta-analysis of results. Variable study designs and biases may have contributed to heterogeneity: for example, the three case-control studies calculated odds ratios, which may differ from equivalent rate ratios for common infections.[16-18] Failure to control the confounding effects of age, sex and diabetes would be likely to result in overestimation of the effect of CKD on infection. Non-differential misclassification of kidney disease status in studies which relied on routine medical diagnosis would be expected to underestimate the effect of CKD on infection risk. In general the risk of ascertainment bias from increased monitoring for infection among patients with CKD is probably low, although one study assessed risk factors for hospitalisation with influenza during an influenza pandemic, in which context patients with influenza-like symptoms may have been more likely to be tested for influenza A(H1N1) if they also had CKD.[21]

1  
2  
3 The heterogeneity may reflect true differences in effect size between the studies.  
4

5  
6 Firstly, the studies considered a range of outcomes. CKD may have a different effect on the  
7  
8 incidence of different infections. For all but three studies, detection of infection required  
9  
10 either hospital attendance for the infection or a positive blood culture. CKD may affect  
11  
12 severity of infection, as an alternative or in addition to any effect on infection incidence.  
13  
14 CKD may also increase the probability of hospital admission for management of a  
15  
16 moderately severe infection. Either would result in a larger effect of CKD on the risk of  
17  
18 severe infectious outcomes (such as hospitalisation for sepsis) than on less severe infections  
19  
20 (such as community-diagnosed LRTI), and could result in the graded association we  
21  
22 observed, with increasing hospitalisation for patients with more severe stages of CKD.  
23  
24

25  
26  
27 Secondly, the studies included a variety of definitions of kidney disease. For example,  
28  
29 proteinuria (and renal loss of complement) may represent a separate mechanism for risk of  
30  
31 infection than uraemia. For the nine studies which did not exclude patients with ESRD it is  
32  
33 unclear to what extent the results reflect the effect of treatments associated with dialysis, such  
34  
35 as vascular or peritoneal access for dialysis, on infection incidence.  
36  
37

38  
39 Thirdly, the association of CKD with infection may be modified by age. James *et al.*  
40  
41 observed a weaker association of CKD with hospitalisation for pneumonia as age increased.  
42  
43 They suggested that such an observation could be explained by a lower baseline rate of  
44  
45 hospitalisation for pneumonia among younger adults, the natural decline in renal function by  
46  
47 age, and inaccuracy in the estimation of renal function using the Modification of Diet in  
48  
49 Renal Disease (MDRD) Study equation in older populations.[27] As their study population  
50  
51 included only adults who had had a creatinine test result, reasons for testing creatinine could  
52  
53 also be relevant confounders. As age-increases, more comorbidities accrue which require  
54  
55 creatinine tests to guide therapy. Hence, younger people who receive a creatinine test may be  
56  
57  
58  
59  
60



1  
2  
3 at an unusually high risk for both infections and CKD due to the reasons associated with  
4 getting a creatinine test. A real age-dependency of the CKD-infection association would be  
5 consistent with the lower effect of CKD on UTI incidence found among 86–90 year olds  
6 (0.90, 95% CI 0.50–1.77) compared with an adult study population with a mean age of 66  
7 years (1.50, 95% CI 1.10–1.90). However, it may be that the study among the older adults  
8 measured a less severe outcome, and CKD may be associated with other factors that  
9 eventually lead to hospitalisation for UTI.[25, 29]  
10  
11  
12  
13  
14  
15  
16  
17  
18

19 CKD was not a component of the primary study question for nine of the 14 studies, thus there  
20 is a risk that this association may have been reported and published only when CKD was  
21 found to be a risk factor for infection or an important confounder of another relationship. This  
22 would result in selective reporting bias, with a subsequent overestimation of the association  
23 of CKD with infection risk. This bias would be expected to affect smaller studies to a greater  
24 extent, and a funnel plot might show an asymmetry of relative risk estimates about the central  
25 pooled estimate among smaller studies. The sparsely populated funnel plot (**Fig S1**) provides  
26 no clear evidence for or against selective reporting bias, but some evidence of selective  
27 reporting bias comes from within the individual studies. For example, the crude hazard ratio  
28 for the association of creatinine clearance with UTI incidence is reported in Caljouw *et al.*  
29 (0.9, 95% CI 0.5–1.7) but as creatinine clearance was not found to be significant in the  
30 multivariable model the adjusted association is not reported.[29]  
31  
32  
33  
34  
35  
36  
37  
38  
39  
40  
41  
42  
43  
44  
45  
46

47 The overlap in the study populations of the two large cohort studies based in Calgary, Canada  
48 could result in more similar estimates than if the study populations were independent.[26-27]  
49

50 Outcomes in the two studies are likely to be correlated with each other: hospitalisation with  
51 pneumonia could cause a positive blood culture, which would result in one infection being  
52 included as an outcome in both studies. This is unlikely to have a large effect, particularly in  
53  
54  
55  
56  
57  
58  
59  
60

1  
2  
3 qualitative assessment of the combined evidence, as the potential overlap of person-time is  
4  
5 limited.

6  
7  
8 Although we excluded study populations routinely treated with specialist medication (unless  
9  
10 for kidney disease), some study populations may have been at higher risk of infection than  
11  
12 the general population, and this may have affected the relationship of CKD to infection. For  
13  
14 example, the cohort of patients admitted for an acute cardiovascular event or an arterial  
15  
16 revascularisation procedure will have had a higher prevalence of co-morbidities (such as  
17  
18 diabetes) than the general population and excluded patients with severe co-morbidities who  
19  
20 did not survive an acute cardiovascular event, or who were not fit enough to undergo the  
21  
22 procedure.[24] Each of the selected study populations limits the generalisability of the  
23  
24 individual study result, but the qualitatively similar findings across the variety of study  
25  
26 populations, and their qualitative consistency with the four studies based among the general  
27  
28 population,[5, 16, 21, 29] support a positive association between CKD and infection risk in a  
29  
30 variety of study populations.  
31  
32  
33  
34  
35

36 A few large, high quality studies which excluded patients with ESRD have found a graded  
37  
38 association between pre-dialysis CKD and risk of hospitalisation with infection. All studies  
39  
40 identified in this review were compatible with a positive association of CKD with increased  
41  
42 infection risk. There are little data available on the association of CKD with infection  
43  
44 incidence using less severe outcome measures than hospitalisation, and it is not possible in  
45  
46 most studies to distinguish an effect on susceptibility to infection from an effect on the  
47  
48 severity of infection.  
49  
50  
51

52 The potential age-dependency of the relationship between CKD and infection is intriguing  
53  
54 and needs further research. There is also currently no evidence on the relationship between  
55  
56 proteinuria and infection incidence independently of glomerular filtration rate. Future studies  
57  
58  
59  
60

1  
2  
3 should identify infections in the community in addition to hospitalisations for infection,  
4  
5 characterise the association of proteinuria adjusted for glomerular filtration rate, explore the  
6  
7 age-dependency of the association, and assess vaccine efficacy among older people with  
8  
9  
10 CKD.  
11  
12  
13  
14  
15  
16  
17  
18  
19  
20  
21  
22  
23  
24  
25  
26  
27  
28  
29  
30  
31  
32  
33  
34  
35  
36  
37  
38  
39  
40  
41  
42  
43  
44  
45  
46  
47  
48  
49  
50  
51  
52  
53  
54  
55  
56  
57  
58  
59  
60

For peer review only

1  
2  
3 **Funding statement:** This report is independent research arising from a Career Development  
4  
5 Fellowship supported by the National Institute for Health Research, awarded to Dr Thomas  
6  
7 (grant number CDF 2010-03-32). HM is funded by a Kidney Research UK studentship, grant  
8  
9 reference ST2/2011. The views expressed in this publication are those of the authors and not  
10  
11 necessarily those of the UK National Health Service, the National Institute for Health  
12  
13 Research, the Department of Health, or Kidney Research UK. The funders of the study had  
14  
15 no role in the study design, data collection, analysis or interpretation, decision to publish, or  
16  
17 preparation of the manuscript.  
18  
19

20  
21 **Contributor statement:**

22  
23  
24 All authors designed the study strategy including the search terms, inclusion and exclusion  
25  
26 criteria. HM performed the search, study selection and data extraction. DN screened the  
27  
28 randomly selected sample of 100 abstracts. All authors agreed quality assessment of included  
29  
30 papers and interpretation of results by discussion. HM drafted the article, which DN and ST  
31  
32 revised. All authors approved the final version of the manuscript.  
33  
34  
35

36  
37 **Competing interests statement:**

38  
39  
40 H I McDonald: None. S L Thomas: None. D Nitsch: None to declare.  
41  
42

43  
44 **Data sharing statement:**

45  
46 All data, including full search terms and eligibility criteria, are available either in the article  
47  
48 or as online supplementary material submitted with this manuscript.  
49  
50  
51  
52  
53  
54  
55  
56  
57  
58  
59  
60

## REFERENCES

1. Coresh J, Selvin E, Stevens LA, et al. Prevalence of chronic kidney disease in the United States. *JAMA*. 2007 Nov 7;298(17):2038-47.
2. Collins AJ, Foley R, Herzog C, et al. United States Renal Data System 2007 Annual Data Report Abstract. *Am J Kidney Dis*. 2008;51(1):A6-A7.
3. Sarnak MJ, Jaber BL. Mortality caused by sepsis in patients with end-stage renal disease compared with the general population. *Kidney Int*. 2000 Oct;58(4):1758-64.
4. Sarnak MJ, Jaber BL. Pulmonary infectious mortality among patients with end-stage renal disease. *Chest*. 2001 Dec;120(6):1883-7.
5. Morbidity and Mortality in Patients With Chronic Kidney Disease. *Am J Kidney Dis*. 2012;59(1):e59-e68.
6. Naqvi SB, Collins AJ. Infectious complications in chronic kidney disease. *Adv Chronic Kidney Dis*. 2006 Jul;13(3):199-204.
7. Viasus D, Garcia-Vidal C, Cruzado JM, et al. Epidemiology, clinical features and outcomes of pneumonia in patients with chronic kidney disease. *Nephrol Dial Transplant*. 2011 Sep;26(9):2899-906.
8. Kausz AT, Gilbertson DT. Overview of vaccination in chronic kidney disease. *Adv Chronic Kidney Dis*. 2006 Jul;13(3):209-14.
9. Allon M, Depner TA, Radeva M, et al. Impact of dialysis dose and membrane on infection-related hospitalization and death: results of the HEMO Study. *J Am Soc Nephrol*. 2003 Jul;14(7):1863-70.
10. Dalrymple LS, Go AS. Epidemiology of acute infections among patients with chronic kidney disease. *Clin J Am Soc Nephrol*. 2008 Sep;3(5):1487-93.
11. Foley RN. Infections in patients with chronic kidney disease. *Infect Dis Clin North Am*. 2007 Sep;21(3):659-72, viii.
12. Foley RN. Infections and cardiovascular disease in patients with chronic kidney disease. *Adv Chronic Kidney Dis*. 2006 Jul;13(3):205-8.
13. The World Bank. Country and lending groups. 2012 [6 June 2013]; Available from: <http://data.worldbank.org/about/country-classifications/country-and-lending-groups>.
14. Higgins JP, Altman DG, Gotzsche PC, et al. The Cochrane Collaboration's tool for assessing risk of bias in randomised trials. *BMJ*. 2011;343:d5928.
15. Higgins JP, Thompson SG, Deeks JJ, et al. Measuring inconsistency in meta-analyses. *BMJ*. 2003 Sep 6;327(7414):557-60.
16. Vinogradova Y, Hippisley-Cox J, Coupland C. Identification of new risk factors for pneumonia: population-based case-control study. *Br J Gen Pract*. 2009 Oct;59(567):e329-38.
17. Watt JP, O'Brien KL, Benin AL, et al. Risk factors for invasive pneumococcal disease among Navajo adults. *Am J Epidemiol*. 2007 Nov 1;166(9):1080-7.
18. Loeb M, Neupane B, Walter SD, et al. Environmental risk factors for community-acquired pneumonia hospitalization in older adults. *Journal of the American Geriatrics Society*. 2009 Jun;57(6):1036-40.
19. Schnoor M, Klante T, Beckmann M, et al. Risk factors for community-acquired pneumonia in German adults: the impact of children in the household. *Epidemiol Infect*. 2007 Nov;135(8):1389-97.
20. Collins AJ, Foley RN, Herzog C, et al. US Renal Data System 2010 Annual Data Report. *Am J Kidney Dis*. 2011 Jan;57(1 Suppl 1):A8, e1-526.
21. Campbell CNJ, Mytton OT, McLean EM, et al. Hospitalization in two waves of pandemic influenza A(H1N1) in England. *Epidemiology & Infection*. 2011 Oct;139(10):1560-9.
22. Higgins RM. Infections in a renal unit. *Q J Med*. 1989 Jan;70(261):41-51.

- 1  
2  
3 23. Dalrymple LS, Katz R, Kestenbaum B, et al. The risk of infection-related hospitalization with  
4 decreased kidney function. *Am J Kidney Dis*. 2012 Mar;59(3):356-63.  
5 24. Hackam DG, Mamdani M, Li P, et al. Statins and sepsis in patients with cardiovascular  
6 disease: a population-based cohort analysis. *Lancet*. 2006 Feb 4;367(9508):413-8.  
7 25. Karunajeewa H, McGeachie D, Stuccio G, et al. Asymptomatic bacteriuria as a predictor of  
8 subsequent hospitalisation with urinary tract infection in diabetic adults: The Fremantle Diabetes  
9 Study. *Diabetologia*. 2005 Jul;48(7):1288-91.  
10 26. James MT, Laupland KB, Tonelli M, et al. Risk of bloodstream infection in patients with  
11 chronic kidney disease not treated with dialysis. *Arch Intern Med*. 2008 Nov 24;168(21):2333-9.  
12 27. James MT, Quan H, Tonelli M, et al. CKD and risk of hospitalization and death with  
13 pneumonia. *Am J Kidney Dis*. 2009 Jul;54(1):24-32.  
14 28. Wang HE, Shapiro NI, Griffin R, et al. Chronic medical conditions and risk of sepsis. *PLOS*  
15 *ONE*. 2012;7(10):e48307.  
16 29. Caljouw MA, den Elzen WP, Cools HJ, et al. Predictive factors of urinary tract infections  
17 among the oldest old in the general population. A population-based prospective follow-up study.  
18 *BMC Med*. 2011;9:57.  
19  
20  
21  
22  
23  
24  
25  
26  
27  
28  
29  
30  
31  
32  
33  
34  
35  
36  
37  
38  
39  
40  
41  
42  
43  
44  
45  
46  
47  
48  
49  
50  
51  
52  
53  
54  
55  
56  
57  
58  
59  
60

1  
2  
3 **FIGURE LEGENDS**  
4

5  
6 **Figure 1: Flow chart of study selection**  
7

8  
9 **Figure 2: Forest plot of all estimates of the association of CKD with infection(n=17)**  
10  
11 **from all 14 studies identified**  
12

13  
14 UTI: urinary tract infection

15 The estimates from Higgin 1985 and USRDS 2010 did not include standard errors.

16 Dalrymple 2012: Presented estimates compare eGFR 45-59 with eGFR  $\geq 90$   
17 mL/min/1.73m<sup>2</sup>

18 James 2009: Presented estimates compare eGFR 45-59 with eGFR 60-104  
19 mL/min/1.73m<sup>2</sup>

20 James 2008: Presented estimates compare estimated glomerular filtration rate (eGFR)  
21 45-59 with eGFR  $\geq 60$  mL/min/1.73m<sup>2</sup>  
22  
23  
24  
25  
26  
27  
28  
29  
30  
31  
32  
33  
34  
35  
36  
37  
38  
39  
40  
41  
42  
43  
44  
45  
46  
47  
48  
49  
50  
51  
52  
53  
54  
55  
56  
57  
58  
59  
60

1  
2  
3 **Title: Chronic kidney disease as a risk factor for acute community-acquired infections:**  
4  
5 **a systematic review ~~and meta-analysis~~**  
6  
7

8 **Authors:** Helen I McDonald,<sup>1</sup> Sara L Thomas,<sup>2</sup> Dorothea Nitsch.<sup>1</sup>  
9

10  
11 1. Department of Non-communicable Disease Epidemiology, London School of Hygiene &  
12 Tropical Medicine, Keppel Street, London, UK.  
13

14  
15 2. Department of Infectious Disease Epidemiology, London School of Hygiene & Tropical  
16 Medicine, Keppel Street, London, UK.  
17  
18  
19

20  
21  
22 **Corresponding author:**  
23

24  
25 Helen I McDonald  
26

27  
28 Faculty of Epidemiology and Population Health, London School of Hygiene & Tropical  
29 Medicine, Keppel Street, London, UK WC1E 7HT. Tel: +44 (0)20 7636 8636 ext 2247. Fax:  
30  
31 N/A. E-mail: [helen.mcdonald@lshtm.ac.uk](mailto:helen.mcdonald@lshtm.ac.uk)  
32  
33  
34

35  
36 **Keywords:** Community-acquired infections, Chronic Renal Insufficiency, Systematic review,  
37 Risk factors.  
38  
39

40  
41  
42 **Word counts:**  
43

44  
45 Abstract: ~~248-246~~ words  
46

47  
48 Body: ~~3,346-3,134~~ words  
49  
50  
51  
52  
53  
54  
55  
56  
57  
58  
59  
60



**ABSTRACT:**

**Objectives:** A systematic review of the association of pre-dialysis chronic kidney disease (CKD) with the incidence of acute, community-acquired infections.

**Design:** We searched Medline, Embase and Cochrane databases (inception to ~~29/03/2012~~16/01/2014) for studies analysing the association of pre-dialysis kidney disease with the incidence of acute, community-acquired urinary tract infection (UTI), lower respiratory tract or central nervous system infections, or sepsis. Studies were required to include at least 30 participants with and without kidney disease.

**Setting & participants:** Community-based populations of adults in high income countries.

**Outcome measures:** Acute, community-acquired urinary tract infection (UTI), lower respiratory tract or central nervous system infections, or sepsis.

**Results:** We identified ~~eleven~~14 eligible studies. Estimates from two studies lacked 95% confidence intervals and standard errors. The remaining ~~12~~ nine studies yielded ~~1742~~ independent effect estimates. ~~Most studies identified only severe infections resulting in hospitalisation~~Only three studies included infections managed in the community. Quality assessment revealed that probable misclassification of kidney disease status and poor adjustment for confounding were common. There was evidence from a few large high quality studies of a graded association between pre-dialysis CKD stage and hospitalisation for infection. One study found an interaction with age, with a declining effect of CKD on infection risk as age increased. There was evidence of between-studies heterogeneity ( ~~$I^2=96.5%$ ,  $p<0.001$~~  which persisted in subgroup analysis, ~~outcomes: UTI  $I^2=55.2%$ ,  $p=0.135$ ; other infections  $I^2=98.0%$ ,  $p<0.001$ ;) and thus meta-analysis was not performed.~~

1  
2  
3 **Conclusions:** Pre-dialysis kidney disease appears to be associated with increased risk of  
4  
5 severe infection. Whether pre-dialysis kidney disease increases the susceptibility to infections  
6  
7 and whether age modifies this association remains unclear.  
8  
9  
10  
11  
12  
13  
14  
15  
16  
17  
18  
19  
20  
21  
22  
23  
24  
25  
26  
27  
28  
29  
30  
31  
32  
33  
34  
35  
36  
37  
38  
39  
40  
41  
42  
43  
44  
45  
46  
47  
48  
49  
50  
51  
52  
53  
54  
55  
56  
57  
58  
59  
60

For peer review only

## ARTICLE SUMMARY

### Article focus:

- This review sought to assess systematically whether pre-dialysis chronic kidney disease (CKD) is a risk factor for the incidence of acute, community-acquired urinary tract infection (UTI), lower respiratory tract infection (LRTI) central nervous system (CNS) infection, or sepsis, among community-based adults in high income countries.
- Any increased risk of infection incidence at early stages of CKD would affect a large and growing number of patients. Awareness and quantification of this risk could have benefits for patient management, more effective vaccination strategies and healthcare planning.

### Key messages:

- We identified major gaps in the literature including: a scarcity of high-quality studies on this research topic; a lack of studies using less severe outcome measures than hospitalisation, to allow any association of CKD with susceptibility to infection to be distinguished from an association with severity of infection; and a lack of data on the relationship between proteinuria and infection incidence independently of glomerular filtration rate.
- All studies were consistent with a positive association between CKD and infection risk.

### Strengths and limitations of this study:

- This study used a sensitive search strategy, with a broad definition of kidney disease, for a thorough and inclusive search.

1  
2  
3  
4  
5  
6  
7  
8  
9  
10  
11  
12  
13  
14  
15  
16  
17  
18  
19  
20  
21  
22  
23  
24  
25  
26  
27  
28  
29  
30  
31  
32  
33  
34  
35  
36  
37  
38  
39  
40  
41  
42  
43  
44  
45  
46  
47  
48  
49  
50  
51  
52  
53  
54  
55  
56  
57  
58  
59  
60

- Between-study heterogeneity, and the low quality of many of the studies, limit interpretation of results of the studies currently available.

For peer review only

## INTRODUCTION

Chronic kidney disease (CKD) is common, and its prevalence is increasing.[1] Infection is a major cause of mortality in end-stage renal disease (ESRD) and hospitalisation at all stages of CKD. The second commonest cause of death among ESRD patients in the US is septicaemia, and patients with ESRD are at increased risk of death from infection compared to the general population.[2-4] Both ESRD and pre-dialysis patients with CKD in the US are at higher risk of hospitalisation for infection than the general population.[2, 5-6] Pre-dialysis CKD has been found to increase mortality among patients hospitalised with infections.[7]

Increased mortality and hospitalisation from infection could be driven by increased severity of infection, i.e. once an infection is present, the course of the associated illness is more severe, or increased incidence, i.e. CKD may make people more susceptible to develop an infection. Patients with CKD display impaired host immunity: reduced vaccination responsiveness is observed at all stages of CKD.[8]

Among ESRD patients, aspects of dialysis, such as vascular and peritoneal access for dialysis, may be a risk factor for infection incidence and severity. However, this does not tell the whole story, and only 23% of infection-related hospitalisations among haemodialysis patients in the US were identified as related to vascular access in the HEMO study.[9] Risk factors for infection identified among ESRD patients which are not related to renal replacement therapy, and could apply at all stages of pre-dialysis CKD, include: the causes and treatment of kidney disease; co-morbidities; reduced vaccine effectiveness; and high levels of exposure to health care facilities.[10]

If there is an increased risk of infection incidence at early stages of CKD, this would affect a large and growing number of patients. Awareness and quantification of this risk could have

1  
2  
3 benefits for patient management, more effective vaccination strategies and healthcare  
4  
5 planning.  
6  
7

8 Narrative reviews have concluded that it is likely that CKD in itself increases infection  
9  
10 incidence, but reported a lack of evidence.[10-12] We are not aware of any relevant  
11  
12 systematic literature reviews of the effect of CKD on infection incidence.  
13  
14

15  
16 This review sought to assess systematically whether pre-dialysis CKD is a risk factor for the  
17  
18 incidence of acute, community-acquired urinary tract infection (UTI), lower respiratory tract  
19  
20 infection (LRTI) central nervous system (CNS) infection, or sepsis, among community-based  
21  
22 adults in high income countries.  
23  
24  
25  
26  
27  
28  
29  
30  
31  
32  
33  
34  
35  
36  
37  
38  
39  
40  
41  
42  
43  
44  
45  
46  
47  
48  
49  
50  
51  
52  
53  
54  
55  
56  
57  
58  
59  
60

## METHODS

### Data Sources and Searches

One reviewer (HM) searched the Medline and Embase databases, and the Cochrane library, from inception to ~~29 March 2012~~16 January 2014. The search strategies combined text words and MeSH terms for three concepts: acute community-acquired infection (either sepsis, UTI, LRTI or CNS infection); kidney disease; and relative risk. We used search terms to identify studies among adult humans in high-income countries (according to the World Bank classification),[13] and limited the search to articles in English, French or German. The full strategies are available in **Supplementary Tables 1-3**.

We searched the reference lists of all included studies and any pertinent review articles to identify further eligible studies.

### Study Selection

One reviewer (HM) screened titles and abstracts, reviewed the full-text of identified studies and made initial decisions on eligibility according to pre-specified inclusion criteria (**Supplementary Table 4**). Any borderline cases were discussed between HM, DN and ST. A second reviewer (DN) checked a sample of 100 abstracts, selected randomly after de-duplication of records, and a kappa statistic was calculated to describe agreement in selection of studies.

Eligible studies analysed the effect of pre-dialysis kidney disease on the relative risk of at least one of the four specified acute, community-acquired infections among community-based adults in high-income countries. We excluded study populations ~~routinely treated with~~

1  
2  
3 specialist medication managed in secondary care (unless ~~these were~~ for kidney disease),  
4  
5 ~~which often has potential immunosuppressive effects routinely treated with~~  
6  
7 ~~immunosuppressants, and study populations or~~ exclusively of pregnant women, as ~~both these~~  
8  
9  
10 groups have a raised risk of infection, and the relationship of CKD to infection risk may be  
11  
12 different among these groups compared to that in the general adult population in primary  
13  
14 care.

15  
16  
17 To maximise the sensitivity of our search strategy, we accepted a wide range of definitions of  
18  
19 kidney disease, including: medical diagnosis of kidney disease, reduced estimated  
20  
21 glomerular filtration rate or creatinine clearance, elevated creatinine, ~~or creatinine clearance~~,  
22  
23 proteinuria, micro- or macro-albuminuria, and renal structural abnormalities. We also  
24  
25 accepted definitions which included some patients with ESRD among the patients with CKD,  
26  
27 but excluded definitions which were exclusively patients receiving renal replacement therapy.

28  
29  
30  
31 Outcomes of interest were relative risk estimates of acute community-acquired LRTIs, UTIs,  
32  
33 CNS infections or sepsis. We accepted outcomes describing incidence of severe infections  
34  
35 (such as hospitalisation with pneumonia).

36  
37  
38  
39 We restricted our search to published studies which were sufficiently large to include at least  
40  
41 30 participants with and without kidney disease, to allow reasonable precision of the study  
42  
43 estimate. Detailed eligibility criteria are listed in **Supplementary Table 4**.

#### 44 45 46 47 **Data Extraction and Quality Assessment**

48  
49  
50 Data were extracted from relevant studies using a pre-specified collection form. Study  
51  
52 characteristics extracted included study design, data source, any participant exclusion criteria,  
53  
54 number of participants, age, gender, baseline renal function, definition of renal impairment,  
55  
56 definition of the outcome infection. An estimate of relative risk (rate ratio, risk ratio or odds  
57  
58  
59  
60



1  
2  
3 ratio) with any measures taken to address confounding was extracted from each eligible  
4  
5 independent analysis in each study. Studies with no confidence intervals and for which the  
6  
7 standard error was not calculable from the data presented were included in the review but not  
8  
9 considered for meta-analysis.  
10

11  
12 When multiple estimates were available from a study but were not independent, a single  
13  
14 estimate was identified for potential meta-analysis by selecting the estimate best adjusted for  
15  
16 confounding, using the most recent data, comparing the level of CKD most common in the  
17  
18 general population with no CKD.  
19  
20

21  
22 Study quality was assessed using a pre-specified tool adapted from Higgins *et al.* for  
23  
24 observational studies.[14] Studies were assigned a high, low or uncertain risk of each of:  
25  
26 selection bias, non-differential measurement error for exposure and outcome, information  
27  
28 bias in exposure and outcome, confounding and reverse causation. The minimum requirement  
29  
30 for a low risk of bias from confounding was appropriate management of confounding by age,  
31  
32 sex and diabetes. Specific criteria used are detailed in **Supplementary Table 5**.  
33  
34  
35  
36

### 37 **Data Synthesis and Analysis**

38  
39 The relationship between CKD and UTIs was considered likely to differ from that of CKD to  
40  
41 other infections, due to potential reverse causality. For example, repeat UTIs may cause  
42  
43 kidney disease, or structural kidney disease may be identified through investigation of repeat  
44  
45 UTIs. Therefore in all quantitative analysis, UTIs were analysed separately from other  
46  
47 infections.  
48  
49

50  
51 Estimates were examined for heterogeneity using Cochran's Q statistic and the  $I^2$  statistic as  
52  
53 described by Higgins *et al.*[15] If  $I^2$  was less than 50% and Cochran's Q statistic  $p \geq 0.1$ ,  
54  
55 fixed-effects meta-analysis was considered for each of the two categories (UTI, and other  
56  
57  
58  
59  
60

1  
2  
3  
4  
5  
6  
7  
8  
9  
10  
11  
12  
13  
14  
15  
16  
17  
18  
19  
20  
21  
22  
23  
24  
25  
26  
27  
28  
29  
30  
31  
32  
33  
34  
35  
36  
37  
38  
39  
40  
41  
42  
43  
44  
45  
46  
47  
48  
49  
50  
51  
52  
53  
54  
55  
56  
57  
58  
59  
60

infections). Funnel plots were constructed to look for publication bias. All analysis was conducted using STATA version 12.0.

For peer review only

## RESULTS

The database searches identified ~~8,363~~10,380 citations, of which ~~1,001~~1,204 were duplicates (**Figure 1**). Both reviewers had 100% agreement on which studies to extract for full-text analysis from screening a random sample of 100 abstracts (Cohen's K= 1).

We identified ~~11~~14 eligible studies, with varying study characteristics (**Table 1**). ~~Three~~Four studies were case-control studies,[16-19] and ~~eight~~ten were cohort studies.[20-29] ~~Five~~Seven studies investigated a range of risk factors for infection,[16-19, 21, 28-29] two studies reported the effect of CKD on infection as a confounder of the effect of interest,[24-25] and ~~only four~~five studies investigated the effect of CKD on infection risk as their primary research question.[5, 20, 22, 26-27]

~~Four~~Seven studies were based among the general population.[5, 16, 19, 21, 23, 28-29] Other study populations included: attendants at a specialist renal clinic,[22] patients with diabetes mellitus,[25] patients admitted to hospital for an acute cardiovascular event or an arterial revascularisation procedure, [24] and the Navajo Nation – a population which experiences 3–5 times higher rates of invasive pneumococcal disease than the general US population.[17] The population of the cohort studies in Calgary, Canada were adults with a serum creatinine test result available in their medical records.[26-27] There is some overlap in the study populations of these two cohort studies: residents aged over 65 years with a serum creatinine measurement between 1 July 2001 and 31 December 2001 and also between 1 July 2003 and 30 June 2004 would have been included in both studies for the period from the second creatinine measurement until 31 December 2004.[26-27]

Definitions of kidney disease included medical diagnoses of chronic renal disease, elevated creatinine levels, impaired creatinine clearance, and structural abnormalities of the kidney.

~~Four~~Five studies excluded patients with ESRD, and one specified the number included, but

1  
2  
3 for the remaining ~~six-eight~~ studies it was unclear how many of the included patients received  
4 renal replacement therapy ([Table 1](#)).

5  
6  
7  
8 ~~Two~~[Three](#) studies recorded infections diagnosed in primary care ~~or outpatients~~, [16, 19, 29]  
9  
10 two recorded infections identified from a positive culture result, [17, 26] one included  
11  
12 infections diagnosed in the emergency department, [18] ~~five-seven~~ required hospital  
13 admission for infection, [5, 21, 23-25, 27-28] and for one study the definition and severity of  
14  
15 infection was unclear. [22]

16  
17  
18  
19  
20 For two studies, the results extracted had no confidence interval or standard error and these  
21  
22 could not be calculated from the reported data. From the remaining ~~nine-12~~ studies, ~~12-17~~  
23 independent effect estimates with standard errors were available for meta-analysis, among  
24  
25 which UTI was the outcome in ~~two-three~~ estimates.

26  
27  
28  
29  
30 For all infections there was strong evidence of considerable heterogeneity (Cochran's Q  
31 statistic  $p < 0.001$ ,  $I^2 = 96.5\%$ ). This persisted when estimates for UTIs were excluded  
32 ( $p < 0.001$ ,  $I^2 = 97.2\%$ ), when considering LRTIs alone ( $p < 0.001$ ,  $I^2 = 98.2\%$ ), when limited to  
33 cohort studies ( $p < 0.001$ ,  $I^2 = 97.3\%$ ), and when stratified by exclusion of patients with ESRD  
34 (ESRD excluded,  $p < 0.001$ ,  $I^2 = 88.9\%$ ; ESRD not excluded  $p < 0.001$ ,  $I^2 = 97.2\%$ ). Due to this  
35 heterogeneity, meta-analysis was not performed. For infections other than UTIs, there was  
36 strong evidence of considerable heterogeneity (Cochran's Q statistic  $p < 0.001$ ,  $I^2 = 98.0\%$ ) and  
37 among the two studies of UTIs, there was some evidence of heterogeneity ( $p = 0.135$ ,  
38  $I^2 = 55.2\%$ ). This remained after considering LRTIs alone ( $p < 0.001$ ,  $I^2 = 98.6\%$ ). For this  
39 reason, meta-analysis was not performed. There were only two studies excluding patients  
40 with ESRD for which standard errors were available, and so these estimates were not  
41 analysed separately.

1  
2  
3 | All results ~~The results available for quantitative analysis~~ are displayed in the Forest plot  
4  
5 (Figure 2). Despite the quantitative heterogeneity, the results were qualitatively similar: all  
6  
7 estimates were compatible with a positive association between kidney disease and infection.

8  
9  
10 The four studies which compared different stages of CKD found a graded association of  
11  
12 increased risk of infection with more severe CKD. These studies all excluded patients with  
13  
14 end-stage renal disease. [22-23, 26-27] One study found that the effect of CKD on infection  
15  
16 risk was modified by age, with a declining effect of CKD on infection risk as age  
17  
18 increased. [27] This effect was consistent with the lower effect of CKD on UTI incidence  
19  
20 found among 86–90 year olds (0.90, 95% CI 0.50–1.77) compared with an adult study  
21  
22 population with a mean age of 66 years (1.50, 95% CI 1.10–1.90). [25, 29]

23  
24  
25  
26 The funnel plot was sparsely populated, with widely scattered effect estimates, and provides  
27  
28 no clear evidence for or against publication bias (Supplementary Figure 1).

29  
30  
31 Study quality was variable. Relying on routine medical diagnosis introduced a potential  
32  
33 source of misclassification of kidney disease status for ~~six~~ seven studies. [5, 16-19, 21, 24]  
34  
35 There was variable adjustment for confounding, from unadjusted crude estimates to estimates  
36  
37 adjusted for a range of comorbidities, demographic and socio-economic factors. ~~Four~~ Six  
38  
39 studies did not meet this review's minimal requirements. [19, 21-22, 25, 28-29] The  
40  
41 summarised results are displayed in Table 2, and the full quality assessment is in  
42  
43  
44  
45 **Supplementary Table 5.**

Table 1: Characteristics of eligible studies (n=~~11~~14)

| Case-control studies             |             |                                 |                                                                                                                       |                       |                                    |                                                                      |                               |                                                                                                                                   |                                                    |                           |                   |                                          |
|----------------------------------|-------------|---------------------------------|-----------------------------------------------------------------------------------------------------------------------|-----------------------|------------------------------------|----------------------------------------------------------------------|-------------------------------|-----------------------------------------------------------------------------------------------------------------------------------|----------------------------------------------------|---------------------------|-------------------|------------------------------------------|
|                                  | Study       |                                 |                                                                                                                       | Kidney disease        |                                    |                                                                      | Infection                     |                                                                                                                                   |                                                    | Kidney disease prevalence |                   | Odds ratio (95% CI)                      |
|                                  | Date        | Setting                         | Population<br>Age<br>% Female                                                                                         | Defined               | ESRD included                      | Ascertained                                                          | Type                          | Defined                                                                                                                           | Ascertained                                        | Cases                     | Controls          |                                          |
| Vinogradova 2009 <sup>[16]</sup> | 1996 - 2005 | UK                              | General population<br><br>Any age<br>Median age band 45-64 years<br><br>Cases 49.3%, controls 49.1%                   | Chronic renal disease | Unclear                            | Primary care medical record diagnosis code in previous 5 years       | Pneumonia                     | Medical diagnosis recorded in primary care records                                                                                | READ code in primary care medical records          | 203/17,172 (1.2%)         | 386/71,299 (0.5%) | 1.72 (1.3 – 2.07) <sup>1</sup>           |
| Watt 2007 <sup>[17]</sup>        | 1999 - 2002 | The Navajo Nation<br><br>USA    | Navajo adults<br><br>≥18 years<br><br>Summary age and sex n/r                                                         | Chronic renal failure | 17 participants receiving dialysis | Medical record abstraction                                           | Invasive pneumococcal disease | S.pneumoniae isolated from a normally sterile body fluid during illness                                                           | Active laboratory surveillance system <sup>2</sup> | 20/118 (16.9%)            | 12/353 (3.4%)     | 2.6 (0.87 – 7.7) <sup>3</sup><br>P=0.087 |
| Loeb 2009 <sup>[18]</sup>        | 2002 - 2005 | Ontario & Alberta<br><br>Canada | General population<br><br>≥ 65 years<br>Mean age: cases 79.1, controls 74.4 years.<br><br>Cases 39.6%, controls 68.5% | Renal disease         | Unclear                            | Cases: hospital interview.<br>Controls: telephone interview at home. | Pneumonia                     | Consistent chest X-ray and ≥2 of: chest pain, shortness of breath, productive cough, temperature >38°C, crackles on auscultation. | Recruited patients attending emergency departments | 127/690 (18.4%)           | 38/82 (4.4%)      | 4.06 (1.98–8.35) <sup>4</sup><br>P<0.001 |
| <u>Schnoor</u>                   | <u>2002</u> | <u>Germany</u>                  | <u>General</u>                                                                                                        | <u>Chronic</u>        | <u>Unclear</u>                     | <u>Cases:</u>                                                        | <u>Pneumonia</u>              | <u>(1) Infiltrate on chest</u>                                                                                                    | <u>Community-</u>                                  | <u>49/1128</u>            | <u>27/1044</u>    | <u>1.7 (1.1–2.8)</u>                     |

|                      |           |  |                                                                                                                   |               |  |                                                                          |  |                                                                                                                                                                                         |                                                                                         |        |        |                        |
|----------------------|-----------|--|-------------------------------------------------------------------------------------------------------------------|---------------|--|--------------------------------------------------------------------------|--|-----------------------------------------------------------------------------------------------------------------------------------------------------------------------------------------|-----------------------------------------------------------------------------------------|--------|--------|------------------------|
| 2007 <sup>[19]</sup> | =<br>2005 |  | population<br>>18 years<br>Mean age:<br>cases 57,<br>controls 57.5<br>years<br><br>Cases 44.8%,<br>controls 54.7% | renal disease |  | reporting<br>physician.<br>Controls: self-<br>reported<br>questionnaire. |  | X-ray or (2)<br>temperature ≥38.3°C<br>with any of: cough,<br>purulent sputum,<br>positive auscultation.<br>Excluded if<br>hospitalised within<br>prior 4 weeks, or<br>immunodeficient. | acquired<br>pneumonia<br>network<br>registry reports<br>(primary and<br>secondary care) | (4.3%) | (2.6%) | (unadjusted)<br>P<0.05 |
|----------------------|-----------|--|-------------------------------------------------------------------------------------------------------------------|---------------|--|--------------------------------------------------------------------------|--|-----------------------------------------------------------------------------------------------------------------------------------------------------------------------------------------|-----------------------------------------------------------------------------------------|--------|--------|------------------------|

**Cohort studies**

| Study                          | Kidney disease |                                      |                                                                                                                                   | Comparison group                                             | Infection                          |                     |                                                | Risk or rate ratio (95% CI)        |                                                                                                    |                                                                                      |                                |                               |
|--------------------------------|----------------|--------------------------------------|-----------------------------------------------------------------------------------------------------------------------------------|--------------------------------------------------------------|------------------------------------|---------------------|------------------------------------------------|------------------------------------|----------------------------------------------------------------------------------------------------|--------------------------------------------------------------------------------------|--------------------------------|-------------------------------|
|                                | Date           | Setting                              | Population Number<br>Age<br>Sex                                                                                                   |                                                              | Defined Number with kidney disease | ESRD                | Ascertained                                    | Defined                            | Type                                                                                               | Defined                                                                              | Ascertained                    |                               |
| Higgins 1989 <sup>[22]</sup>   | 1985           | Oxford UK                            | Patients attending a Renal Unit with chronic renal failure<br><br>n=211<br><br>17-77 years<br>Mean 50.5 years<br><br>% female n/r | Creatinine ≥250 µmol/l<br><br>Number n/r                     | Excluded                           | Serum creatinine    | Creatinine <250 µmol/l<br><br>n/r              | UTI                                | >10 <sup>5</sup> organism/ml and ≥10 leucocytes /hpf in clean catch urine specimen                 | Medical record review                                                                | Creatinine µmol/l              |                               |
|                                |                | 1 year                               |                                                                                                                                   |                                                              |                                    |                     |                                                |                                    |                                                                                                    |                                                                                      | <250                           | 1                             |
|                                |                |                                      |                                                                                                                                   |                                                              |                                    |                     |                                                |                                    |                                                                                                    |                                                                                      | 250-500                        | 1.5 <sup>5</sup>              |
|                                |                |                                      |                                                                                                                                   |                                                              |                                    |                     |                                                |                                    |                                                                                                    |                                                                                      | >500                           | 2 <sup>5</sup>                |
| Dalrymple 2012 <sup>[23]</sup> | 1989 = 2007    | United States<br><br>Mean 11.5 years | General community-dwelling population <sup>6</sup><br><br>n=5,142<br><br>>65 years<br>Mean 72 years                               | Baseline eGFR<90 mL/min/1.73 m <sup>2.7</sup><br><br>n=3,863 | Excluded                           | Baseline cystatin C | Baseline eGFR ≥90 mL/min/1.73 m <sup>2.7</sup> | Pulmonary<br><br><br>Genitourinary | Hospital admission with a principal discharge diagnosis of the relevant infection (ICD-9-CM codes) | Medical record review following patient report of hospital admission in cohort study | eGFR mL/min/1.73m <sup>2</sup> |                               |
|                                |                |                                      |                                                                                                                                   |                                                              |                                    |                     |                                                |                                    |                                                                                                    |                                                                                      | ≥90                            | 1                             |
|                                |                |                                      |                                                                                                                                   |                                                              |                                    |                     |                                                |                                    |                                                                                                    |                                                                                      | 60-89                          | 1.22 (0.99-1.54) <sup>8</sup> |
|                                |                |                                      |                                                                                                                                   |                                                              |                                    |                     |                                                |                                    |                                                                                                    |                                                                                      | 45-59                          | 1.27 (0.94-1.71) <sup>8</sup> |
|                                |                |                                      |                                                                                                                                   |                                                              |                                    |                     |                                                |                                    |                                                                                                    |                                                                                      | 15-44                          | 1.81 (1.25-2.63) <sup>8</sup> |
|                                |                |                                      |                                                                                                                                   |                                                              |                                    |                     |                                                |                                    |                                                                                                    |                                                                                      | ≥90                            | 1                             |
|                                |                |                                      |                                                                                                                                   |                                                              |                                    |                     |                                                |                                    |                                                                                                    |                                                                                      | 60-89                          | 1.08 (0.75-1.56) <sup>8</sup> |
|                                |                |                                      |                                                                                                                                   |                                                              |                                    |                     |                                                |                                    |                                                                                                    |                                                                                      | 45-59                          | 1.17 (0.67-2.05) <sup>8</sup> |
|                                |                |                                      |                                                                                                                                   |                                                              |                                    |                     |                                                |                                    |                                                                                                    |                                                                                      | 15-44                          | 2.63 (1.40-4.96) <sup>8</sup> |

1  
2  
3  
4  
5  
6  
7  
8  
9  
10  
11  
12  
13  
14  
15  
16  
17  
18  
19  
20  
21  
22  
23  
24  
25  
26  
27  
28  
29  
30  
31  
32  
33  
34  
35  
36  
37  
38  
39  
40  
41  
42  
43  
44  
45  
46  
47  
48  
49

|                                                  |                               |                                          |                                                                                                        |                                                                          |          |                                                                                |                                                            |                                       |                                                                                                                       |                                      |                                                                                                                                                                                                                                                                                                                                                                                                                                                                                                                                         |                                 |             |                                          |                                              |         |                                          |                                |                               |                                |                                                  |          |                                        |
|--------------------------------------------------|-------------------------------|------------------------------------------|--------------------------------------------------------------------------------------------------------|--------------------------------------------------------------------------|----------|--------------------------------------------------------------------------------|------------------------------------------------------------|---------------------------------------|-----------------------------------------------------------------------------------------------------------------------|--------------------------------------|-----------------------------------------------------------------------------------------------------------------------------------------------------------------------------------------------------------------------------------------------------------------------------------------------------------------------------------------------------------------------------------------------------------------------------------------------------------------------------------------------------------------------------------------|---------------------------------|-------------|------------------------------------------|----------------------------------------------|---------|------------------------------------------|--------------------------------|-------------------------------|--------------------------------|--------------------------------------------------|----------|----------------------------------------|
|                                                  |                               |                                          | 61% female                                                                                             |                                                                          |          |                                                                                |                                                            | Bacteremia and sepsis                 |                                                                                                                       |                                      | <table border="1"> <tr> <td>≥90</td> <td>1</td> </tr> <tr> <td>60-89</td> <td>1.10 (0.77-1.58)<sup>8</sup></td> </tr> <tr> <td>45-59</td> <td>1.55 (0.93-2.57)<sup>8</sup></td> </tr> <tr> <td>15-44</td> <td>0.77 (0.29-2.03)<sup>8</sup></td> </tr> </table>                                                                                                                                                                                                                                                                          | ≥90                             | 1           | 60-89                                    | 1.10 (0.77-1.58) <sup>8</sup>                | 45-59   | 1.55 (0.93-2.57) <sup>8</sup>            | 15-44                          | 0.77 (0.29-2.03) <sup>8</sup> |                                |                                                  |          |                                        |
| ≥90                                              | 1                             |                                          |                                                                                                        |                                                                          |          |                                                                                |                                                            |                                       |                                                                                                                       |                                      |                                                                                                                                                                                                                                                                                                                                                                                                                                                                                                                                         |                                 |             |                                          |                                              |         |                                          |                                |                               |                                |                                                  |          |                                        |
| 60-89                                            | 1.10 (0.77-1.58) <sup>8</sup> |                                          |                                                                                                        |                                                                          |          |                                                                                |                                                            |                                       |                                                                                                                       |                                      |                                                                                                                                                                                                                                                                                                                                                                                                                                                                                                                                         |                                 |             |                                          |                                              |         |                                          |                                |                               |                                |                                                  |          |                                        |
| 45-59                                            | 1.55 (0.93-2.57) <sup>8</sup> |                                          |                                                                                                        |                                                                          |          |                                                                                |                                                            |                                       |                                                                                                                       |                                      |                                                                                                                                                                                                                                                                                                                                                                                                                                                                                                                                         |                                 |             |                                          |                                              |         |                                          |                                |                               |                                |                                                  |          |                                        |
| 15-44                                            | 0.77 (0.29-2.03) <sup>8</sup> |                                          |                                                                                                        |                                                                          |          |                                                                                |                                                            |                                       |                                                                                                                       |                                      |                                                                                                                                                                                                                                                                                                                                                                                                                                                                                                                                         |                                 |             |                                          |                                              |         |                                          |                                |                               |                                |                                                  |          |                                        |
| Hackam 2006 <sup>[24]</sup>                      | 1997 - 2002                   | Ontario Canada<br>Mean 2.2 years         | Patients with cardiovascular disease<br>n=69,168<br><br>>65 years<br>Mean 74.1 years<br><br>44% female | Chronic renal insufficiency<br>n=7,169                                   | Unclear  | Health record databases <sup>9</sup>                                           | No chronic renal insufficiency                             | Sepsis                                | Hospital admission with a diagnosis of sepsis <sup>10</sup>                                                           | Health record database <sup>11</sup> | 1.47 (1.27-1.72) <sup>12</sup>                                                                                                                                                                                                                                                                                                                                                                                                                                                                                                          |                                 |             |                                          |                                              |         |                                          |                                |                               |                                |                                                  |          |                                        |
| Karunajeewa 2005 <sup>[25]</sup>                 | 1999 - 2000                   | Western Australia<br>Mean 2.9 years      | Patients with diabetes<br>n=496<br><br>>10 years<br>Mean 66.1 years <sup>13</sup><br><br>46.2% female  | Albuminuria; serum urea; serum creatinine                                | Unclear  | Baseline urinary albumin: creatinine ratio (ACR), serum urea, serum creatinine | Hazard ratio per 2.72-fold increase in ACR or serum urea   | Urinary sepsis and non-urinary sepsis | Hospitalisation diagnosis codes (principal diagnosis, or principal or secondary diagnosis) <sup>14</sup>              | Health record database <sup>15</sup> | <table border="1"> <tr> <td>Urinary sepsis (principal code)</td> <td>Ln(ACR)</td> <td>1.5 (1.1 - 1.9)<sup>16</sup><br/>p=0.004</td> </tr> <tr> <td>Urinary sepsis (principal or secondary code)</td> <td>Ln(ACR)</td> <td>1.3 (1.1 - 1.6)<sup>17</sup><br/>p=0.005</td> </tr> <tr> <td>Non-urinary sepsis (principal)</td> <td>Ln(ACR)</td> <td>1.4(1.1-1.9)<sup>16</sup></td> </tr> <tr> <td>Non-urinary sepsis (principal or secondary code)</td> <td>Ln(urea)</td> <td>4.6 (2.3-9.4)<sup>16</sup><br/>p&lt;0.001</td> </tr> </table> | Urinary sepsis (principal code) | Ln(ACR)     | 1.5 (1.1 - 1.9) <sup>16</sup><br>p=0.004 | Urinary sepsis (principal or secondary code) | Ln(ACR) | 1.3 (1.1 - 1.6) <sup>17</sup><br>p=0.005 | Non-urinary sepsis (principal) | Ln(ACR)                       | 1.4(1.1-1.9) <sup>16</sup>     | Non-urinary sepsis (principal or secondary code) | Ln(urea) | 4.6 (2.3-9.4) <sup>16</sup><br>p<0.001 |
| Urinary sepsis (principal code)                  | Ln(ACR)                       | 1.5 (1.1 - 1.9) <sup>16</sup><br>p=0.004 |                                                                                                        |                                                                          |          |                                                                                |                                                            |                                       |                                                                                                                       |                                      |                                                                                                                                                                                                                                                                                                                                                                                                                                                                                                                                         |                                 |             |                                          |                                              |         |                                          |                                |                               |                                |                                                  |          |                                        |
| Urinary sepsis (principal or secondary code)     | Ln(ACR)                       | 1.3 (1.1 - 1.6) <sup>17</sup><br>p=0.005 |                                                                                                        |                                                                          |          |                                                                                |                                                            |                                       |                                                                                                                       |                                      |                                                                                                                                                                                                                                                                                                                                                                                                                                                                                                                                         |                                 |             |                                          |                                              |         |                                          |                                |                               |                                |                                                  |          |                                        |
| Non-urinary sepsis (principal)                   | Ln(ACR)                       | 1.4(1.1-1.9) <sup>16</sup>               |                                                                                                        |                                                                          |          |                                                                                |                                                            |                                       |                                                                                                                       |                                      |                                                                                                                                                                                                                                                                                                                                                                                                                                                                                                                                         |                                 |             |                                          |                                              |         |                                          |                                |                               |                                |                                                  |          |                                        |
| Non-urinary sepsis (principal or secondary code) | Ln(urea)                      | 4.6 (2.3-9.4) <sup>16</sup><br>p<0.001   |                                                                                                        |                                                                          |          |                                                                                |                                                            |                                       |                                                                                                                       |                                      |                                                                                                                                                                                                                                                                                                                                                                                                                                                                                                                                         |                                 |             |                                          |                                              |         |                                          |                                |                               |                                |                                                  |          |                                        |
| James 2008 <sup>[26]</sup>                       | 2001 - 2004                   | Calgary Canada<br>Mean 3.2 years         | General population<br>n=25,675<br><br>>65 years<br>Mean by eGFR <sup>18</sup><br><br>55.9% female      | Baseline eGFR<60 mL/min/1.73 m <sup>2</sup> <sup>19</sup><br><br>n=6,941 | Excluded | Calgary Laboratory Services records                                            | Baseline eGFR ≥60 mL/min/1.73 m <sup>2</sup> <sup>19</sup> | Bloodstream infection                 | Any pathogenic organism isolated from ≥1 blood cultures submitted from the community or ≤2 days of hospital admission | Calgary Laboratory Services records  | <table border="1"> <tr> <td>eGFR mL/min/1.73m<sup>2</sup></td> <td>≥60</td> <td>1</td> </tr> <tr> <td></td> <td>45-59</td> <td>1.17 (0.92-1.49)<sup>20</sup></td> </tr> <tr> <td></td> <td>30-44</td> <td>1.60 (1.20-2.13)<sup>20</sup></td> </tr> <tr> <td></td> <td>&lt;30</td> <td>2.95 (2.11-4.14)<sup>20</sup></td> </tr> </table>                                                                                                                                                                                                 | eGFR mL/min/1.73m <sup>2</sup>  | ≥60         | 1                                        |                                              | 45-59   | 1.17 (0.92-1.49) <sup>20</sup>           |                                | 30-44                         | 1.60 (1.20-2.13) <sup>20</sup> |                                                  | <30      | 2.95 (2.11-4.14) <sup>20</sup>         |
| eGFR mL/min/1.73m <sup>2</sup>                   | ≥60                           | 1                                        |                                                                                                        |                                                                          |          |                                                                                |                                                            |                                       |                                                                                                                       |                                      |                                                                                                                                                                                                                                                                                                                                                                                                                                                                                                                                         |                                 |             |                                          |                                              |         |                                          |                                |                               |                                |                                                  |          |                                        |
|                                                  | 45-59                         | 1.17 (0.92-1.49) <sup>20</sup>           |                                                                                                        |                                                                          |          |                                                                                |                                                            |                                       |                                                                                                                       |                                      |                                                                                                                                                                                                                                                                                                                                                                                                                                                                                                                                         |                                 |             |                                          |                                              |         |                                          |                                |                               |                                |                                                  |          |                                        |
|                                                  | 30-44                         | 1.60 (1.20-2.13) <sup>20</sup>           |                                                                                                        |                                                                          |          |                                                                                |                                                            |                                       |                                                                                                                       |                                      |                                                                                                                                                                                                                                                                                                                                                                                                                                                                                                                                         |                                 |             |                                          |                                              |         |                                          |                                |                               |                                |                                                  |          |                                        |
|                                                  | <30                           | 2.95 (2.11-4.14) <sup>20</sup>           |                                                                                                        |                                                                          |          |                                                                                |                                                            |                                       |                                                                                                                       |                                      |                                                                                                                                                                                                                                                                                                                                                                                                                                                                                                                                         |                                 |             |                                          |                                              |         |                                          |                                |                               |                                |                                                  |          |                                        |
| James 2009 <sup>[27]</sup>                       | 2003 -                        | Calgary Canada                           | General population                                                                                     | Time updated                                                             | Excluded | Calgary Laboratory                                                             | eGFR 60-104 mL/min/1.73                                    | Pneumonia                             | ICD-10 code for pneumonia any                                                                                         | Hospital discharge                   | <table border="1"> <tr> <td>eGFR mL/min/1.73m<sup>2</sup></td> <td>18-54 years</td> </tr> </table>                                                                                                                                                                                                                                                                                                                                                                                                                                      | eGFR mL/min/1.73m <sup>2</sup>  | 18-54 years |                                          |                                              |         |                                          |                                |                               |                                |                                                  |          |                                        |
| eGFR mL/min/1.73m <sup>2</sup>                   | 18-54 years                   |                                          |                                                                                                        |                                                                          |          |                                                                                |                                                            |                                       |                                                                                                                       |                                      |                                                                                                                                                                                                                                                                                                                                                                                                                                                                                                                                         |                                 |             |                                          |                                              |         |                                          |                                |                               |                                |                                                  |          |                                        |



|                           |             |                                |                                                                                                                                                       |                                                                  |         |                           |                                                            |        |                                                                                                             |                                                                                |                                                                                                                                                                                                                                                                                                                                                                                                                                                                                                                                                                                                                                    |
|---------------------------|-------------|--------------------------------|-------------------------------------------------------------------------------------------------------------------------------------------------------|------------------------------------------------------------------|---------|---------------------------|------------------------------------------------------------|--------|-------------------------------------------------------------------------------------------------------------|--------------------------------------------------------------------------------|------------------------------------------------------------------------------------------------------------------------------------------------------------------------------------------------------------------------------------------------------------------------------------------------------------------------------------------------------------------------------------------------------------------------------------------------------------------------------------------------------------------------------------------------------------------------------------------------------------------------------------|
|                           | 2006        | Median 2.5 years               | n=252,516<br>≥18 years<br>Mean by eGFR <sup>21</sup><br><br>42.3% female                                                                              | eGFR<60 mL/min/1.73 m <sup>2</sup> <sup>22</sup><br><br>n=35,948 |         | Services records          | m <sup>2</sup> <sup>22</sup>                               |        | position in hospital discharge report                                                                       | reports                                                                        | 60-104   1<br>45-59   3.23 (2.40–4.36) <sup>23</sup><br>30-44   9.67 (6.36–14.69) <sup>23</sup><br><30   15.04 (9.64–23.47) <sup>23</sup><br>Age 55 – 64 years<br>60-104   1<br>45-59   1.43 (1.11–1.84) <sup>23</sup><br>30-44   1.94 (1.32–2.87) <sup>23</sup><br><30   5.50 (3.83–7.92) <sup>23</sup><br>Age 65 – 74 years<br>60-104   1<br>45-59   1.18 (0.99–1.40) <sup>23</sup><br>30-44   2.24 (1.84–2.73) <sup>23</sup><br><30   3.23 (2.52–4.13) <sup>23</sup><br>Age ≥75 years<br>60-104   1<br>45-59   0.95 (0.85–1.05) <sup>23</sup><br>30-44   1.03 (0.92–1.16) <sup>23</sup><br><30   1.79 (1.55–2.06) <sup>23</sup> |
| Wang 2012 <sup>[28]</sup> | 2003 – 2011 | United States<br>Mean .7 years | General population sample (weighted by age, geography and ethnicity) <sup>24</sup><br><br>n=30,239<br><br>≥45 years<br>69%>60 years<br><br>55% female | Baseline eGFR<60 mL/min/1.73 m <sup>2</sup> <sup>25</sup>        | Unclear | Baseline serum creatinine | Baseline eGFR ≥60 mL/min/1.73 m <sup>2</sup> <sup>25</sup> | Sepsis | Among hospitalisations attributed by participants to serious infection, medical record review <sup>26</sup> | Initially reported by study participants, confirmed with medical record review | 1.99 (1.73–2.29) <sup>27</sup>                                                                                                                                                                                                                                                                                                                                                                                                                                                                                                                                                                                                     |

|                                                             |                                  |                   |                                                       |                                                                                                             |                                                                |          |                                                                                                                                |                                                    |                                                         |                                                                                                                                     |                                                                                                                         |                                                                     |
|-------------------------------------------------------------|----------------------------------|-------------------|-------------------------------------------------------|-------------------------------------------------------------------------------------------------------------|----------------------------------------------------------------|----------|--------------------------------------------------------------------------------------------------------------------------------|----------------------------------------------------|---------------------------------------------------------|-------------------------------------------------------------------------------------------------------------------------------------|-------------------------------------------------------------------------------------------------------------------------|---------------------------------------------------------------------|
| 1<br>2<br>3<br>4<br>5<br>6<br>7<br>8<br>9<br>10<br>11<br>12 | Caljouw<br>2011 <sup>[29]</sup>  | 1998<br>-<br>2004 | Leiden<br>The<br>Netherlands<br><br>Mean 2.6<br>years | General<br>population<br><br>n= 479<br><br>86-90 years<br>All aged 86<br>years at entry<br><br>67.2% female | Creatinine<br>clearance<br><30mL/min <sup>28</sup><br><br>n=43 | Unclear  | Baseline<br>serum<br>creatinine                                                                                                | Creatinine<br>clearance<br>≥30mL/min <sup>28</sup> | UTI                                                     | Diagnosed by<br>treating<br>physician based<br>on signs,<br>symptoms and<br>urine analysis;<br>or death<br>records <sup>29</sup>    | Physician<br>interview and<br>medical record<br>review.<br><br>Statistics<br>Netherlands for<br>cause of death<br>data. | 0.9 (0.5–1.7) (unadjusted)<br>p=0.794                               |
| 13<br>14<br>15<br>16<br>17<br>18<br>19<br>20<br>21<br>22    | Campbell<br>2011 <sup>[21]</sup> | 2009<br>-<br>2010 | England<br>UK<br><br>9 months                         | General<br>population<br><br>n=43.9 million<br><br>6 months - 64<br>years<br><br>Summary age<br>and sex n/r | Chronic<br>kidney<br>disease<br><br>n=182,000                  | Unclear  | Cases:<br>consultant<br>microbiologist<br>report.<br><br>Denominator:<br>primary care<br>population<br>estimate. <sup>30</sup> | No pre-<br>existing<br>conditions <sup>30</sup>    | Pandemic<br>influenza<br>A(H1N1)                        | Polymerase<br>chain reaction<br>(PCR) test<br>confirmation of<br>pandemic<br>influenza A<br>(H1N1) from a<br>hospital<br>inpatient. | Consultant<br>microbiologist<br>report to<br>national<br>surveillance<br>system.                                        | 17.5 (13.4 – 22.9) <sup>31</sup>                                    |
| 23<br>24<br>25<br>26<br>27<br>28<br>29<br>30<br>31          | USRDS<br>2010 <sup>[20]</sup>    | 2008              | USA<br><br>1 year <sup>32</sup>                       | Medicare<br>patients<br>66+ years                                                                           | Chronic<br>kidney<br>disease                                   | Excluded | Insurance<br>database ICD-<br>9_CM codes <sup>33</sup>                                                                         | No CKD                                             | Pneumonia<br><br>UTI<br><br>Bacteraemia/<br>septicaemia | Principal cause<br>of hospital<br>admission using<br>hospital<br>insurance claim<br>records                                         | ICD-9-CM codes<br>480-486<br><br>ICD-9-CM codes <sup>34</sup><br><br>ICD-9-CM codes<br>038.0 – 038.9                    | 2.76 (unadjusted)<br><br>3.15 (unadjusted)<br><br>3.90 (unadjusted) |

95% CI = 95% confidence interval; n/r = not reported; CKD= chronic kidney disease; UTI = urinary tract infection

1. Controls matched to cases on age at index data (within 1 year), sex, general practice, and calendar time. Estimate adjusted for smoking status, Townsend deprivation score, use of influenza vaccine in previous 12 months, use of pneumococcal vaccine in previous 5 years, number of years of medical records data available in database, and comorbidities including: diabetes, chronic heart disease, chronic respiratory disease, asplenia, cerebrospinal shunt, chronic liver disease, sickle cell disease or coeliac disease, cochlear implant, HIV/AIDS, immunosuppression, stroke or transient ischaemic attack, rheumatoid arthritis, Parkinson's disease, multiple sclerosis, dementia, osteoporosis, and any cancer.

2. Center for American Indian Health surveillance system.

3. Cases and controls matched by gender and age group. Adjusted for age, receipt of pneumococcal polysaccharide vaccine, congestive heart failure, alcohol use, body mass index and unemployment.
4. Adjusted for age, non-English language spoken most at home, living in detached house, living alone, congestive heart failure, chronic obstructive pulmonary disease, dysphagia, functional status using Barthel Index, immunosuppressive medications, nutritional score, tobacco use (lifetime history and secondhand smoke), alcohol consumption and history of regular exposure to gases, fumes or chemicals at home, or at work.
5. Approximate numbers, read from bar graph in publication. No confidence intervals available.
6. Cohort selected for the Cardiovascular Health Study. Exclusion criteria included: inability to provide informed consent or communicate with the interviewer, institutionalisation, being homebound, receipt of hospice care, treatment with radiation or chemotherapy for cancer, or plans to move out of the community within 3 years.
7. Serum cystatin C measured by particle-enhanced immunonephelometric assay, and eGFR calculated using:  $eGFR=6.7 \times CysC^{-1.19}$ .
8. Adjusted for age, sex, race, tobacco use, body mass index, diabetes mellitus, coronary heart disease, stroke, heart failure, cancer, chronic obstructive pulmonary disease, serum albumin, C-reactive protein, interleukin-6.
9. Canadian Institute for Health Information Discharge Abstract database or Ontario Health Insurance Plan database
10. ICD-9 codes 003 1, 036 2 and 038 0 – 038 9.
11. Canadian Institute for Health Information Discharge Abstract database.
12. Adjusted for statins, age, sex, nature of index event, charlson index, healthcare use, malignant disease, chemotherapy, neutropaenia, diabetes mellitus, oral steroids, antineoplastics, other immunosuppressants, history of aspiration, structural lung disease, previous infection (respiratory, GI, skin/soft tissue or other), recent trauma, transplant recipient, heart failure, stroke, chronic liver disease, chronic obstructive pulmonary disease, alcoholism, dementia, Parkinson's disease. Statin and non-statin users matched using propensity scoring for the above factors.
13. Mean age among the 460 participants without asymptomatic bacteriuria, 66.1years (SD11.0): mean age among the 36 participants with asymptomatic bacteriuria, 67.7 years (SD 10.5).
14. ICD-9 or ICD-10 codes for urinary sepsis were those encoding UTI, cystitis, pyelonephritis, orchitis, epididymitis and prostatitis; codes for non-urinary sepsis were those for sepsis, septicaemia and/or abscess.
15. Western Australia Data Linkage System.
16. Adjusted for presence of asymptomatic bacteriuria.
17. Adjusted for presence of asymptomatic bacteriuria and age.
18. Mean age  $\pm$ SD by eGFR.  $\geq 60$ : 74.4 $\pm$ 6.5years. 45-59: 77.5 $\pm$ 7.2 years. 30-44: 79.3 $\pm$ 7.4years.  $<30$ : 78.6 $\pm$ 7.4 years.
19. eGFR calculated using abbreviated Modification of Diet in Renal Disease Study equation (omitting ethnicity) from single outpatient serum creatinine result.
20. Adjusted for age, sex, diabetes mellitus, comorbidity score and care in a CKD clinic.
21. Mean age  $\pm$ SD by eGFR.  $\geq 105$ : 38.7 $\pm$ 14.6. 60-104: 50.9 $\pm$ 15.4. 45-59: 67.0 $\pm$  14.1. 30-44: 74.5 $\pm$ 12.9.  $<30$ : 73.3 $\pm$ 15.2.
22. eGFR calculated using abbreviated Modification of Diet in Renal Disease Study equation (omitting ethnicity) from most recent outpatient serum creatinine result.
23. Adjusted for age, sex, socio-economic status, ethnicity, diabetes mellitus, Charlson comorbidity score.
24. Cohort selected for the Reasons for Geographic and Racial Differences in Stroke (REGARDS) study. Population weighted by age, ethnicity and geography according to local stroke incidence rates.
25. eGFR calculated using CKD-EPI equation.

1  
2  
3  
4  
5  
6  
7  
8  
9  
10  
11  
12  
13  
14  
15  
16  
17  
18  
19  
20  
21  
22  
23  
24  
25  
26  
27  
28  
29  
30  
31  
32  
33  
34  
35  
36  
37  
38  
39  
40  
41  
42  
43  
44  
45  
46  
47  
48  
49

26. Medical record review confirming (1) serious infection as major reason for admission and (2)  $\geq 2$  of heart rate  $>90$  beats/minute, temperature  $>38.3^{\circ}\text{C}$  or  $<36^{\circ}\text{C}$ , tachypnoea  $>20$  breaths/minute or leucocytosis.

27. Adjusted for age, sex, race, education, income, geographic region, alcohol use and smoking status.

28. Creatinine clearance calculated from serum creatinine concentration and weight using Cockcroft-Gault formula.

29. Cause of death recorded as UTI (ICD-10 code N39.0)/

30. Department of Health-Health Protection Agency influenza vaccine uptake primary care monitoring system data.

31. Adjusted for age.

32. Smoothed estimate: Models include data from the stated year and the two years preceding it, applying weights of 1,  $\frac{1}{4}$  and  $\frac{1}{8}$  with increasing distance in time.

33. ICD-9-CM diagnosis codes recorded in insurance claims during the preceding year: 585.1 – 585.5 (chronic kidney disease stages 1-5); or 585.6 with no ESRD 2728 form or other indication of ESRD.

34. Principal hospital admission ICD-9-CM codes: 590-590.9, 595-595.4, 597-597.89, 598, 599.0, 601-601.9, 604-604.9, 607.1-2, 608.0, 608.4, 616.1, 616.3-4, and 616.8.

For peer review only

**Table 2: Summary of risk of bias within studies (quality assessment tool adapted from Higgins *et al.*)[14]**

|                                                | Selection bias:<br>control selection | Selection bias:<br>participation | Selection bias:<br>loss to follow up | Non-differential<br>misclassification:<br>Exposure | Information bias:<br>Exposure | Non-differential<br>misclassification:<br>Outcome | Information bias:<br>Outcome | Confounding | Reverse causation |
|------------------------------------------------|--------------------------------------|----------------------------------|--------------------------------------|----------------------------------------------------|-------------------------------|---------------------------------------------------|------------------------------|-------------|-------------------|
| <b>Case-control studies</b>                    |                                      |                                  |                                      |                                                    |                               |                                                   |                              |             |                   |
| Vinogradova 2009 <sup>[16]</sup>               |                                      |                                  | N/A                                  |                                                    |                               |                                                   |                              |             |                   |
| Watt 2007 <sup>[17]</sup>                      |                                      |                                  | N/A                                  |                                                    |                               |                                                   |                              |             |                   |
| Loeb 2009 <sup>[18]</sup>                      |                                      |                                  | N/A                                  |                                                    |                               |                                                   |                              |             |                   |
| <a href="#">Schnoor 2007</a> <sup>[19]</sup>   |                                      |                                  | N/A                                  |                                                    |                               |                                                   |                              |             |                   |
| <b>Cohort studies</b>                          |                                      |                                  |                                      |                                                    |                               |                                                   |                              |             |                   |
| Higgins 1989 <sup>[22]</sup>                   | N/A                                  | N/A                              |                                      |                                                    |                               |                                                   |                              |             |                   |
| Hackam 2006 <sup>[24]</sup>                    | N/A                                  | N/A                              |                                      |                                                    |                               |                                                   |                              |             |                   |
| <a href="#">Dalrymple 2012</a> <sup>[23]</sup> | N/A                                  | N/A                              |                                      |                                                    |                               |                                                   |                              |             |                   |
| Karunajeewa 2005 <sup>[25]</sup>               | N/A                                  | N/A                              |                                      |                                                    |                               |                                                   |                              |             |                   |
| James 2008 <sup>[26]</sup>                     | N/A                                  | N/A                              |                                      |                                                    |                               |                                                   |                              |             |                   |
| James 2009 <sup>[27]</sup>                     | N/A                                  | N/A                              |                                      |                                                    |                               |                                                   |                              |             |                   |
| <a href="#">Wang 2012</a> <sup>[28]</sup>      | N/A                                  | N/A                              |                                      |                                                    |                               |                                                   |                              |             |                   |
| Caljouw 2011 <sup>[29]</sup>                   | N/A                                  | N/A                              |                                      |                                                    |                               |                                                   |                              |             |                   |
| Campbell 2011 <sup>[21]</sup>                  | N/A                                  | N/A                              |                                      |                                                    |                               |                                                   |                              |             |                   |
| USRDS 2010 <sup>[20]</sup>                     | N/A                                  | N/A                              |                                      |                                                    |                               |                                                   |                              |             |                   |

**Key to table 2**

Low risk of bias

Uncertain risk of bias

High risk of bias

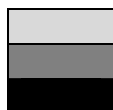

## DISCUSSION

Our comprehensive search strategy identified ~~11~~14 studies describing an association between kidney disease and acute community-acquired infection. Although between-study heterogeneity precluded meta-analysis, all were consistent with a positive direction of association. The four studies which reported estimates on more than one category of kidney disease all found a graded association in which risk of infection increased with greater severity of CKD. ~~These four studies all excluded patients with end-stage renal disease, and three were at low risk of bias in all categories of quality assessment.~~ [22-23, 26-27]

To our knowledge, this is the first review to address this research question systematically. We used a sensitive search strategy, with a broad definition of kidney disease, for a thorough and inclusive search. The results are consistent with the conclusion of previous narrative reviews: that an association between CKD and infection incidence is likely, but that there is a paucity of evidence. [10-12]

~~Since our literature search, a subsequently published US prospective cohort study of 5,142 adults over 65 years old found an association between worse kidney function and higher risk of hospitalisation for infection. [21] Identification of CKD status was proactive and based on baseline blood measurements. The association was linear when kidney function was calculated using serum cystatin C, and U-shaped when kidney function was calculated using serum creatinine.~~

Heterogeneity between the studies precluded meta-analysis of results. Variable study designs and biases may have contributed to heterogeneity: for example, the three case-control studies calculated odds ratios, which may differ from equivalent rate ratios for common infections. [16-18] Failure to control the confounding effects of age, sex and diabetes would be likely to result in overestimation of the effect of CKD on infection. Non-differential

1  
2  
3 misclassification of kidney disease status in studies which relied on routine medical diagnosis  
4  
5 would be expected to underestimate the effect of CKD on infection risk. In general the risk of  
6  
7 ascertainment bias from increased monitoring for infection among patients with CKD is  
8  
9 probably low, although one study assessed risk factors for hospitalisation with influenza  
10  
11 during an influenza pandemic, in which context patients with influenza-like symptoms may  
12  
13 have been more likely to be tested for influenza A(H1N1) if they also had CKD.[21]  
14  
15

16  
17 The heterogeneity may reflect true differences in effect size between the studies.  
18

19  
20 Firstly, the studies considered a range of outcomes. CKD may have a different effect on the  
21  
22 incidence of different infections. ~~We analysed the effect of CKD on UTIs separately.~~ For all  
23  
24 but three studies, detection of infection required either hospital attendance for the infection or  
25  
26 a positive blood culture. CKD may affect severity of infection, as an alternative or in  
27  
28 addition to any effect on infection incidence. CKD may also increase the probability of  
29  
30 hospital admission for management of a moderately severe infection. Either would result in a  
31  
32 larger effect of CKD on the risk of severe infectious outcomes (such as hospitalisation for  
33  
34 sepsis) than on less severe infections (such as community-diagnosed LRTI), and could result  
35  
36 in the graded association we observed, with increasing hospitalisation for patients with more  
37  
38 severe stages of CKD.  
39  
40

41  
42 Secondly, the studies included a variety of definitions of kidney disease. For example,  
43  
44 proteinuria (and renal loss of complement) may represent a separate mechanism for risk of  
45  
46 infection than uraemia. For the ~~seven~~nine studies which did not exclude patients with ESRD  
47  
48 it is unclear to what extent the results reflect the effect of treatments associated with dialysis,  
49  
50 such as vascular or peritoneal access for dialysis, on infection incidence.  
51  
52

53  
54 Thirdly, the association of CKD with infection may be modified by age. James *et al.*  
55  
56 observed a weaker association of CKD with hospitalisation for pneumonia as age increased.  
57  
58  
59  
60

1  
2  
3 They suggested that such an observation could be explained by a lower baseline rate of  
4 hospitalisation for pneumonia among younger adults, the natural decline in renal function by  
5 age, and inaccuracy in the estimation of renal function using the Modification of Diet in  
6 Renal Disease (MDRD) Study equation in older populations.[27] As their study population  
7 included only adults who had had a creatinine test result, reasons for testing creatinine could  
8 also be relevant confounders. As age-increases, more comorbidities accrue which require  
9 creatinine tests to guide therapy. Hence, younger people who receive a creatinine test may be  
10 at an unusually high risk for both infections and CKD due to the reasons associated with  
11 getting a creatinine test. A real age-dependency of the CKD-infection association would be  
12 consistent with the lower effect of CKD on UTI incidence found among 86–90 year olds  
13 (0.90, 95% CI 0.50–1.77) compared with an adult study population with a mean age of 66  
14 years (1.50, 95% CI 1.10–1.90). However, it may be that the study among the older adults  
15 measured a less severe outcome, and CKD may be associated with other factors that  
16 eventually lead to hospitalisation for UTI.[25, 29]

17  
18  
19  
20  
21  
22  
23  
24  
25  
26  
27  
28  
29  
30  
31  
32  
33  
34  
35 CKD was not a component of the primary study question for 7-nine of the ~~11-14~~ studies, thus  
36 there is a risk that this association may have been reported and published only when CKD  
37 was found to be a risk factor for infection or an important confounder of another relationship.  
38 This would result in selective reporting bias, with a subsequent overestimation of the  
39 association of CKD with infection risk. This bias would be expected to affect smaller studies  
40 to a greater extent, and a funnel plot might show an asymmetry of relative risk estimates  
41 about the central pooled estimate among smaller studies. The sparsely populated funnel plot  
42 (**Fig S1**) provides no clear evidence for or against selective reporting bias, but some evidence  
43 of selective reporting bias comes from within the individual studies. For example, the crude  
44 hazard ratio for the association of creatinine clearance with UTI incidence is reported in  
45  
46  
47  
48  
49  
50  
51  
52  
53  
54  
55  
56  
57  
58  
59  
60



1  
2  
3 Caljouw *et al.* (0.9, 95% CI 0.5–1.7) but as creatinine clearance was not found to be  
4  
5 significant in the multivariable model the adjusted association is not reported.[29]  
6  
7

8  
9 The overlap in the study populations of the two large cohort studies based in Calgary, Canada  
10  
11 could result in more similar estimates than if the study populations were independent.[26-27]  
12  
13 Outcomes in the two studies are likely to be correlated with each other: hospitalisation with  
14  
15 pneumonia could cause a positive blood culture, which would result in one infection being  
16  
17 included as an outcome in both studies. This is unlikely to have a large effect, particularly in  
18  
19 qualitative assessment of the combined evidence, as the potential overlap of person-time is  
20  
21 limited.  
22  
23

24  
25 Although we excluded study populations routinely treated with specialist medication (unless  
26  
27 for kidney disease), some study populations may have been at higher risk of infection than  
28  
29 the general population, and this may have affected the relationship of CKD to infection. For  
30  
31 example, the cohort of patients admitted for an acute cardiovascular event or an arterial  
32  
33 revascularisation procedure will have had a higher prevalence of co-morbidities (such as  
34  
35 diabetes) than the general population and excluded patients with severe co-morbidities who  
36  
37 did not survive an acute cardiovascular event, or who were not fit enough to undergo the  
38  
39 procedure.[24] Each of the selected study populations limits the generalisability of the  
40  
41 individual study result, but the qualitatively similar findings across the variety of study  
42  
43 populations, and their qualitative consistency with the four studies based among the general  
44  
45 population,[5, 16, 21, 29] support a positive association between CKD and infection risk in a  
46  
47 variety of study populations.  
48  
49  
50  
51

52  
53 A few large, high quality studies which excluded patients with ESRD have found a graded  
54  
55 association between pre-dialysis CKD and risk of hospitalisation with infection. All studies  
56  
57 identified in this review were compatible with a positive association of CKD with increased  
58  
59  
60

1  
2  
3 infection risk. There are little data available on the association of CKD with infection  
4  
5 incidence using less severe outcome measures than hospitalisation, and it is not possible in  
6  
7 most studies to distinguish an effect on susceptibility to infection from an effect on the  
8  
9 severity of infection.  
10

11  
12 The potential age-dependency of the relationship between CKD and infection is intriguing  
13  
14 and needs further research. There is also currently no evidence on the relationship between  
15  
16 proteinuria and infection incidence independently of glomerular filtration rate. Future studies  
17  
18 should identify infections in the community in addition to hospitalisations for infection,  
19  
20 characterise the association of proteinuria adjusted for glomerular filtration rate, explore the  
21  
22 age-dependency of the association, and assess vaccine efficacy among older people with  
23  
24 CKD.  
25  
26  
27  
28  
29  
30  
31  
32  
33  
34  
35  
36  
37  
38  
39  
40  
41  
42  
43  
44  
45  
46  
47  
48  
49  
50  
51  
52  
53  
54  
55  
56  
57  
58  
59  
60

## REFERENCES

1. Coresh J, Selvin E, Stevens LA, et al. Prevalence of chronic kidney disease in the United States. *JAMA*. 2007 Nov 7;298(17):2038-47.
2. Collins AJ, Foley R, Herzog C, et al. United States Renal Data System 2007 Annual Data Report Abstract. *Am J Kidney Dis*. 2008;51(1):A6-A7.
3. Sarnak MJ, Jaber BL. Mortality caused by sepsis in patients with end-stage renal disease compared with the general population. *Kidney Int*. 2000 Oct;58(4):1758-64.
4. Sarnak MJ, Jaber BL. Pulmonary infectious mortality among patients with end-stage renal disease. *Chest*. 2001 Dec;120(6):1883-7.
5. Morbidity and Mortality in Patients With Chronic Kidney Disease. *Am J Kidney Dis*. 2012;59(1):e59-e68.
6. Naqvi SB, Collins AJ. Infectious complications in chronic kidney disease. *Adv Chronic Kidney Dis*. 2006 Jul;13(3):199-204.
7. Viasus D, Garcia-Vidal C, Cruzado JM, et al. Epidemiology, clinical features and outcomes of pneumonia in patients with chronic kidney disease. *Nephrol Dial Transplant*. 2011 Sep;26(9):2899-906.
8. Kausz AT, Gilbertson DT. Overview of vaccination in chronic kidney disease. *Adv Chronic Kidney Dis*. 2006 Jul;13(3):209-14.
9. Allon M, Depner TA, Radeva M, et al. Impact of dialysis dose and membrane on infection-related hospitalization and death: results of the HEMO Study. *J Am Soc Nephrol*. 2003 Jul;14(7):1863-70.
10. Dalrymple LS, Go AS. Epidemiology of acute infections among patients with chronic kidney disease. *Clin J Am Soc Nephrol*. 2008 Sep;3(5):1487-93.
11. Foley RN. Infections in patients with chronic kidney disease. *Infect Dis Clin North Am*. 2007 Sep;21(3):659-72, viii.
12. Foley RN. Infections and cardiovascular disease in patients with chronic kidney disease. *Adv Chronic Kidney Dis*. 2006 Jul;13(3):205-8.
13. The World Bank. Country and lending groups. 2012 [6 June 2013]; Available from: <http://data.worldbank.org/about/country-classifications/country-and-lending-groups>.
14. Higgins JP, Altman DG, Gotzsche PC, et al. The Cochrane Collaboration's tool for assessing risk of bias in randomised trials. *BMJ*. 2011;343:d5928.
15. Higgins JP, Thompson SG, Deeks JJ, et al. Measuring inconsistency in meta-analyses. *BMJ*. 2003 Sep 6;327(7414):557-60.
16. Vinogradova Y, Hippisley-Cox J, Coupland C. Identification of new risk factors for pneumonia: population-based case-control study. *Br J Gen Pract*. 2009 Oct;59(567):e329-38.
17. Watt JP, O'Brien KL, Benin AL, et al. Risk factors for invasive pneumococcal disease among Navajo adults. *Am J Epidemiol*. 2007 Nov 1;166(9):1080-7.
18. Loeb M, Neupane B, Walter SD, et al. Environmental risk factors for community-acquired pneumonia hospitalization in older adults. *Journal of the American Geriatrics Society*. 2009 Jun;57(6):1036-40.
19. Schnoor M, Klante T, Beckmann M, et al. Risk factors for community-acquired pneumonia in German adults: the impact of children in the household. *Epidemiol Infect*. 2007 Nov;135(8):1389-97.
20. Collins AJ, Foley RN, Herzog C, et al. US Renal Data System 2010 Annual Data Report. *Am J Kidney Dis*. 2011 Jan;57(1 Suppl 1):A8, e1-526.
21. Campbell CNJ, Mytton OT, McLean EM, et al. Hospitalization in two waves of pandemic influenza A(H1N1) in England. *Epidemiology & Infection*. 2011 Oct;139(10):1560-9.
22. Higgins RM. Infections in a renal unit. *Q J Med*. 1989 Jan;70(261):41-51.
23. Dalrymple LS, Katz R, Kestenbaum B, et al. The risk of infection-related hospitalization with decreased kidney function. *Am J Kidney Dis*. 2012 Mar;59(3):356-63.

- 1  
2  
3 24. Hackam DG, Mamdani M, Li P, et al. Statins and sepsis in patients with cardiovascular  
4 disease: a population-based cohort analysis. *Lancet*. 2006 Feb 4;367(9508):413-8.  
5 25. Karunajeewa H, McGeachie D, Stuccio G, et al. Asymptomatic bacteriuria as a predictor of  
6 subsequent hospitalisation with urinary tract infection in diabetic adults: The Fremantle Diabetes  
7 Study. *Diabetologia*. 2005 Jul;48(7):1288-91.  
8 26. James MT, Laupland KB, Tonelli M, et al. Risk of bloodstream infection in patients with  
9 chronic kidney disease not treated with dialysis. *Arch Intern Med*. 2008 Nov 24;168(21):2333-9.  
10 27. James MT, Quan H, Tonelli M, et al. CKD and risk of hospitalization and death with  
11 pneumonia. *Am J Kidney Dis*. 2009 Jul;54(1):24-32.  
12 28. Wang HE, Shapiro NI, Griffin R, et al. Chronic medical conditions and risk of sepsis. *PLOS*  
13 *ONE*. 2012;7(10):e48307.  
14 29. Caljouw MA, den Elzen WP, Cools HJ, et al. Predictive factors of urinary tract infections  
15 among the oldest old in the general population. A population-based prospective follow-up study.  
16 *BMC Med*. 2011;9:57.  
17  
18  
19  
20  
21  
22  
23  
24  
25  
26  
27  
28  
29  
30  
31  
32  
33  
34  
35  
36  
37  
38  
39  
40  
41  
42  
43  
44  
45  
46  
47  
48  
49  
50  
51  
52  
53  
54  
55  
56  
57  
58  
59  
60

1  
2  
3 **FIGURE LEGENDS**  
4

5  
6 **Figure 1: Flow chart of study selection**  
7

8  
9 **Figure 2: Forest plot of all estimates of the association of CKD with infection(n=~~12~~17)**  
10  
11 **~~from the nine studies included in quantitative analysis~~ from all 14 studies identified**  
12

13  
14 UTI: urinary tract infection

15 The estimates from Higgin 1985 and USRDS 2010 did not include standard errors.

16 Dalrymple 2012: Presented estimates compare eGFR 45-59 with eGFR  $\geq 90$

17 mL/min/1.73m<sup>2</sup>

18 James 2009: Presented estimates compare eGFR 45-59 with eGFR 60-104

19 mL/min/1.73m<sup>2</sup>

20 James 2008: Presented estimates compare estimated glomerular filtration rate (eGFR)

21 45-59 with eGFR  $\geq 60$  mL/min/1.73m<sup>2</sup>  
22  
23  
24  
25  
26  
27  
28  
29  
30  
31  
32  
33  
34  
35  
36  
37  
38  
39  
40  
41  
42  
43  
44  
45  
46  
47  
48  
49  
50  
51  
52  
53  
54  
55  
56  
57  
58  
59  
60

**Contributor statement:**

All authors designed the study strategy including the search terms, inclusion and exclusion criteria. HM performed the search, study selection and data extraction. DN screened the randomly selected sample of 100 abstracts. All authors agreed quality assessment of included papers and interpretation of results by discussion. HM drafted the article, which DN and ST revised. All authors approved the final version of the manuscript.

**Competing interests statement:**

H I McDonald: None. S L Thomas: None. D Nitsch: None to declare.

**Funding statement:** This report is independent research arising from a Career Development Fellowship supported by the National Institute for Health Research, awarded to Dr Thomas (grant number CDF 2010-03-32). HM is funded by a Kidney Research UK studentship, grant reference ST2/2011. The views expressed in this publication are those of the authors and not necessarily those of the UK National Health Service, the National Institute for Health Research, the Department of Health, or Kidney Research UK. The funders of the study had no role in the study design, data collection, analysis or interpretation, decision to publish, or preparation of the manuscript.

**Data sharing statement:**

All data, including full search terms and eligibility criteria, are available either in the article or as online supplementary material submitted with this manuscript.

1  
2  
3  
4  
5  
6  
7  
8  
9  
10  
11  
12  
13  
14  
15  
16  
17  
18  
19  
20  
21  
22  
23  
24  
25  
26  
27  
28  
29  
30  
31  
32  
33  
34  
35  
36  
37  
38  
39  
40  
41  
42  
43  
44  
45  
46  
47  
48  
49  
50  
51  
52  
53  
54  
55  
56  
57  
58  
59  
60

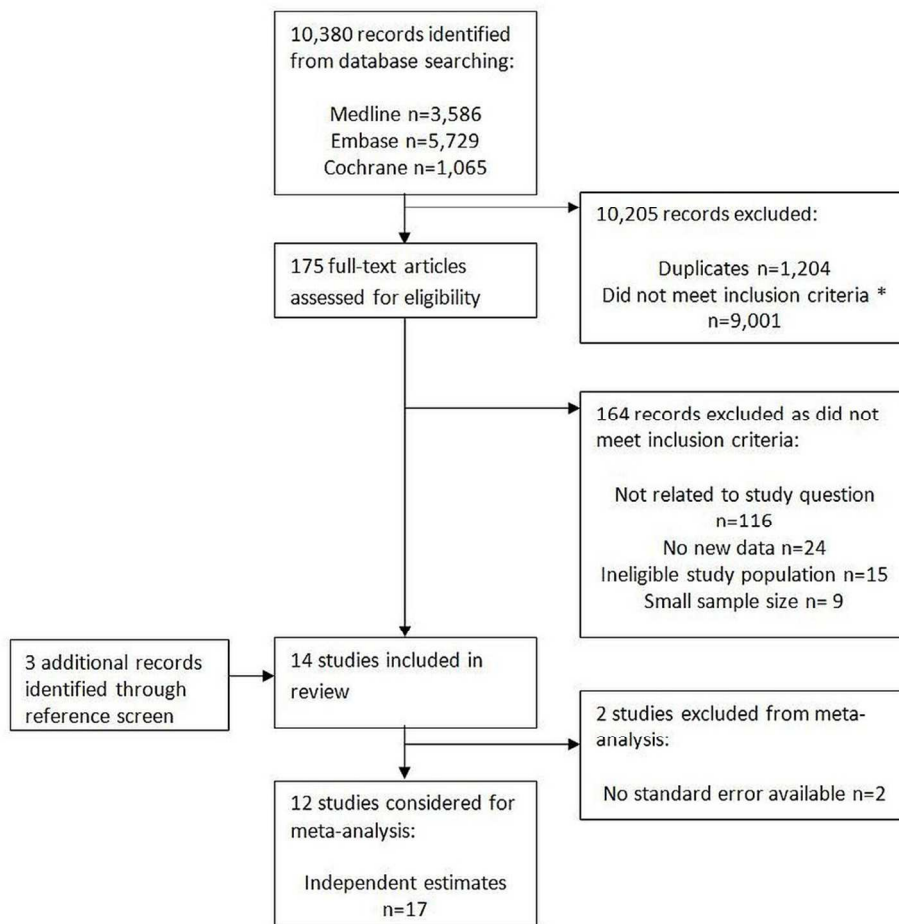

90x85mm (300 x 300 DPI)

only

1  
2  
3  
4  
5  
6  
7  
8  
9  
10  
11  
12  
13  
14  
15  
16  
17  
18  
19  
20  
21  
22  
23  
24  
25  
26  
27  
28  
29  
30  
31  
32  
33  
34  
35  
36  
37  
38  
39  
40  
41  
42  
43  
44  
45  
46  
47  
48  
49  
50  
51  
52  
53  
54  
55  
56  
57  
58  
59  
60

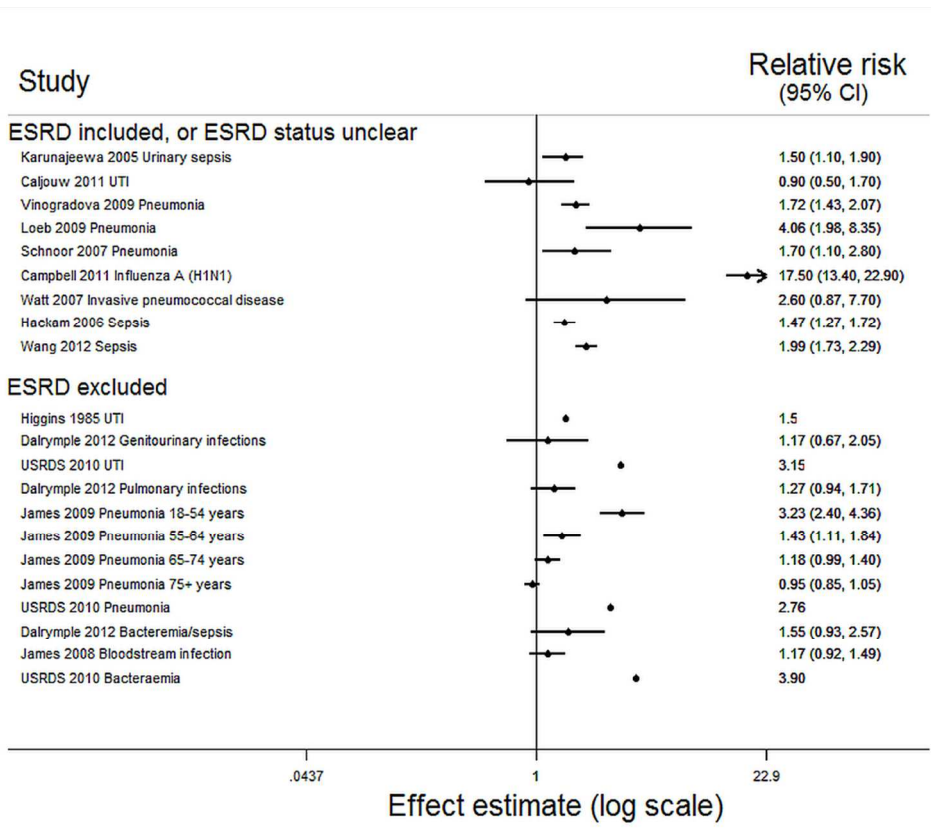

90x75mm (300 x 300 DPI)

view only



Supplementary Table 1: Medline search strategy

|    | Search                                                                                                                                                                                                                                                                                                                                                                                                                                                                                                                                                                                                                                                                                                                                                                                                                                                                                                                                                                                                                                                                                                                                                                                                                                   | Results |
|----|------------------------------------------------------------------------------------------------------------------------------------------------------------------------------------------------------------------------------------------------------------------------------------------------------------------------------------------------------------------------------------------------------------------------------------------------------------------------------------------------------------------------------------------------------------------------------------------------------------------------------------------------------------------------------------------------------------------------------------------------------------------------------------------------------------------------------------------------------------------------------------------------------------------------------------------------------------------------------------------------------------------------------------------------------------------------------------------------------------------------------------------------------------------------------------------------------------------------------------------|---------|
| 1  | (sepsis* or septic?emia or bacter?emia or fung?emia or pneumonia* or bronchopneumonia* or pleuropneumonia* or LRTI or empy?ema or influenza* or legionell* or bacteriuri* or pyelonephriti* or cystitis* or pyelocystitis* or pyelitis* or urethriti* or UTI or meningiti* or meningococc* or encephaliti* or poliomyeliti* or septic shock).tw.                                                                                                                                                                                                                                                                                                                                                                                                                                                                                                                                                                                                                                                                                                                                                                                                                                                                                         | 343181  |
| 2  | (CNS adj4 infection*).tw.                                                                                                                                                                                                                                                                                                                                                                                                                                                                                                                                                                                                                                                                                                                                                                                                                                                                                                                                                                                                                                                                                                                                                                                                                | 2545    |
| 3  | (central nervous adj4 infection*).tw.                                                                                                                                                                                                                                                                                                                                                                                                                                                                                                                                                                                                                                                                                                                                                                                                                                                                                                                                                                                                                                                                                                                                                                                                    | 3805    |
| 4  | exp cerebral phaeohyphomycosis/ or central nervous system infections/ or exp brain abscess/ or exp toxoplasmosis, cerebral/ or central nervous system bacterial infections/ or exp empyema, subdural/ or exp epidural abscess/ or exp lyme neuroborreliosis/ or exp meningitis, bacterial/ or exp meningitis, escherichia coli/ or exp meningitis, haemophilus/ or exp meningitis, listeria/ or exp meningitis, meningococcal/ or exp meningitis, pneumococcal/ or exp central nervous system fungal infections/ or exp meningitis, fungal/ or exp meningitis, cryptococcal/ or exp neuroaspergillosis/ or central nervous system viral diseases/ or exp encephalitis/ or exp encephalitis, viral/ or exp encephalitis, arbovirus/ or exp encephalitis, california/ or exp encephalitis, japanese/ or exp "encephalitis, st. louis"/ or exp encephalitis, tick-borne/ or exp west nil fever/ or exp encephalitis, herpes simplex/ or exp encephalitis, varicella zoster/ or exp encephalomyelitis, equine/ or exp meningitis, viral/ or exp lymphocytic choriomeningitis/ or exp meningitis, aseptic/ or exp paraparesis, tropical spastic/ or poliomyelitis/ or exp poliomyelitis, bulbar/ or exp encephalomyelitis/ or exp meningitis/ | 102876  |
| 5  | exp endocarditis, bacterial/ or exp endocarditis, subacute bacterial/ or exp pneumococcal infections/ or catheter-related infections/ or exp coinfection/ or communicable diseases/ or exp community-acquired infections/ or exp sepsis/ or exp bacteremia/ or exp hemorrhagic septicemia/ or exp fungemia/ or exp shock, septic/ or exp empyema/ or exp viremia/ or exp parasitemia/                                                                                                                                                                                                                                                                                                                                                                                                                                                                                                                                                                                                                                                                                                                                                                                                                                                    | 139752  |
| 6  | ((renal or kidney) adj4 chronic adj4 failure*).tw.                                                                                                                                                                                                                                                                                                                                                                                                                                                                                                                                                                                                                                                                                                                                                                                                                                                                                                                                                                                                                                                                                                                                                                                       | 21053   |
| 7  | ((renal or kidney) adj4 chronic adj4 disease*).tw.                                                                                                                                                                                                                                                                                                                                                                                                                                                                                                                                                                                                                                                                                                                                                                                                                                                                                                                                                                                                                                                                                                                                                                                       | 15978   |
| 8  | ((renal or kidney) adj4 chronic adj4 insufficienc*).tw.                                                                                                                                                                                                                                                                                                                                                                                                                                                                                                                                                                                                                                                                                                                                                                                                                                                                                                                                                                                                                                                                                                                                                                                  | 4448    |
| 9  | ((renal or kidney) adj4 chronic adj4 injury).tw.                                                                                                                                                                                                                                                                                                                                                                                                                                                                                                                                                                                                                                                                                                                                                                                                                                                                                                                                                                                                                                                                                                                                                                                         | 454     |
| 10 | ((renal or kidney) adj4 chronic adj4 impairment*).tw.                                                                                                                                                                                                                                                                                                                                                                                                                                                                                                                                                                                                                                                                                                                                                                                                                                                                                                                                                                                                                                                                                                                                                                                    | 336     |
| 11 | (creatinine* or GFR or eGFR or albuminuri* or proteinuri* or microalbuminuri* or                                                                                                                                                                                                                                                                                                                                                                                                                                                                                                                                                                                                                                                                                                                                                                                                                                                                                                                                                                                                                                                                                                                                                         | 194742  |

|    |    |                                                                                           |
|----|----|-------------------------------------------------------------------------------------------|
| 1  |    |                                                                                           |
| 2  |    |                                                                                           |
| 3  |    |                                                                                           |
| 4  |    | nephropath* or glomerulo* or nephr#ti* or nephrosi* or ur?emia or ESRD or CKD or          |
| 5  |    | cardio-renal or Kimmelstiel-Wilson).tw.                                                   |
| 6  |    |                                                                                           |
| 7  | 12 | Creatinine/bl [Blood] 25724                                                               |
| 8  |    |                                                                                           |
| 9  | 13 | Kidney Diseases/co, ep [Complications, Epidemiology] 11809                                |
| 10 |    |                                                                                           |
| 11 | 14 | exp diabetic nephropathies/ or exp hypertension, renal/ or exp nephritis/ or exp anti-    |
| 12 |    | glomerular basement membrane disease/ or exp glomerulonephritis, iga/ or exp              |
| 13 |    | glomerulonephritis, membranoproliferative/ or exp glomerulonephritis, membranous/         |
| 14 |    | or exp lupus nephritis/ or exp nephrosclerosis/ or exp nephrosis/ or exp renal            |
| 15 |    | insufficiency/ or exp cardio-renal syndrome/ or exp uremia/ or exp azotemia/ or exp       |
| 16 |    | proteinuria/ 234481                                                                       |
| 17 |    |                                                                                           |
| 18 |    |                                                                                           |
| 19 |    |                                                                                           |
| 20 | 15 | kidney function tests/ or exp glomerular filtration rate/ 44837                           |
| 21 |    |                                                                                           |
| 22 | 16 | Animals/ 4889105                                                                          |
| 23 |    |                                                                                           |
| 24 | 17 | Humans/ 12139628                                                                          |
| 25 |    |                                                                                           |
| 26 |    |                                                                                           |
| 27 | 18 | 16 not (16 and 17) 3594930                                                                |
| 28 |    |                                                                                           |
| 29 | 19 | Adult/ 3567838                                                                            |
| 30 |    |                                                                                           |
| 31 | 20 | exp child/ or exp child, preschool/ or exp infant/ 1849722                                |
| 32 |    |                                                                                           |
| 33 | 21 | 20 not (19 and 20) 1265383                                                                |
| 34 |    |                                                                                           |
| 35 | 22 | Case reports/ 1557478                                                                     |
| 36 |    |                                                                                           |
| 37 | 23 | developing countries/ or exp africa/ or cuba/ or dominica/ or dominican republic/ or      |
| 38 |    | grenada/ or guadeloupe/ or haiti/ or jamaica/ or exp central america/ or "gulf of         |
| 39 |    | mexico"/ or latin america/ or exp south america/ or exp asia, central/ or borneo/ or      |
| 40 |    | cambodia/ or east timor/ or indonesia/ or laos/ or malaysia/ or mekong valley/ or         |
| 41 |    | myanmar/ or philippines/ or thailand/ or vietnam/ or bangladesh/ or india/ or             |
| 42 |    | afghanistan/ or iran/ or iraq/ or jordan/ or lebanon/ or syria/ or turkey/ or yemen/ or   |
| 43 |    | nepal/ or pakistan/ or sri lanka/ or exp china/ or "democratic people's republic of       |
| 44 |    | korea"/ or mongolia/ or albania/ or latvia/ or lithuania/ or bosnia-herzegovina/ or       |
| 45 |    | bulgaria/ or "republic of belarus"/ or romania/ or exp russia/ or serbia/ or ukraine/ or  |
| 46 |    | yugoslavia/ or exp transcaucasia/ or exp indian ocean islands/ or fiji/ or papua new      |
| 47 |    | guinea/ or vanuatu/ or palau/ or hawaii/ 620630                                           |
| 48 |    |                                                                                           |
| 49 |    |                                                                                           |
| 50 |    |                                                                                           |
| 51 |    |                                                                                           |
| 52 |    |                                                                                           |
| 53 |    |                                                                                           |
| 54 | 24 | developed countries/ or bahamas/ or barbados/ or netherlands antilles/ or puerto rico/    |
| 55 |    | or "trinidad and tobago"/ or "virgin islands of the united states"/ or canada/ or         |
| 56 |    | greenland/ or united states/ or brunei/ or singapore/ or bahrain/ or israel/ or kuwait/   |
| 57 |    | or oman/ or qatar/ or saudi arabia/ or united arab emirates/ or hong kong/ or macau/      |
| 58 |    | or exp japan/ or "republic of korea"/ or bermuda/ or exp australia/ or andorra/ or        |
| 59 |    | austria/ or belgium/ or estonia/ or croatia/ or czech republic/ or hungary/ or poland/ or |
| 60 |    |                                                                                           |

1  
2  
3  
4  
5  
6  
7  
8  
9  
10  
11  
12  
13  
14  
15  
16  
17  
18  
19  
20  
21  
22  
23  
24  
25  
26  
27  
28  
29  
30  
31  
32  
33  
34  
35  
36  
37  
38  
39  
40  
41  
42  
43  
44  
45  
46  
47  
48  
49  
50  
51  
52  
53  
54  
55  
56  
57  
58  
59  
60

|           |                                                                                                                                                                                                                                                                                                                                                                                                                                                                                                                                                                                                                                                                                     |         |
|-----------|-------------------------------------------------------------------------------------------------------------------------------------------------------------------------------------------------------------------------------------------------------------------------------------------------------------------------------------------------------------------------------------------------------------------------------------------------------------------------------------------------------------------------------------------------------------------------------------------------------------------------------------------------------------------------------------|---------|
|           | slovakia/ or slovenia/ or finland/ or exp france/ or exp germany/ or gibraltar/ or exp great britain/ or greece/ or iceland/ or ireland/ or exp italy/ or liechtenstein/ or luxembourg/ or cyprus/ or malta/ or monaco/ or netherlands/ or portugal/ or san marino/ or exp scandinavia/ or spain/ or switzerland/ or new zealand/ or new caledonia/ or guam/                                                                                                                                                                                                                                                                                                                        |         |
| <b>25</b> | 23 not (23 and 24)                                                                                                                                                                                                                                                                                                                                                                                                                                                                                                                                                                                                                                                                  | 556094  |
| <b>26</b> | Postoperative complications.sh.                                                                                                                                                                                                                                                                                                                                                                                                                                                                                                                                                                                                                                                     | 263650  |
| <b>27</b> | (incidence* or odds ratio or risk ratio or risk factor or relative risk).tw.                                                                                                                                                                                                                                                                                                                                                                                                                                                                                                                                                                                                        | 608698  |
| <b>28</b> | (respiratory adj3 infection*).tw.                                                                                                                                                                                                                                                                                                                                                                                                                                                                                                                                                                                                                                                   | 28563   |
| <b>29</b> | (lower respiratory adj3 infection*).tw.                                                                                                                                                                                                                                                                                                                                                                                                                                                                                                                                                                                                                                             | 4633    |
| <b>30</b> | (urinary adj3 infection*).tw.                                                                                                                                                                                                                                                                                                                                                                                                                                                                                                                                                                                                                                                       | 28333   |
| <b>31</b> | (upper urinary adj3 infection*).tw.                                                                                                                                                                                                                                                                                                                                                                                                                                                                                                                                                                                                                                                 | 312     |
| <b>32</b> | 6 or 7 or 8 or 9 or 10 or 11 or 12 or 13 or 14 or 15                                                                                                                                                                                                                                                                                                                                                                                                                                                                                                                                                                                                                                | 366856  |
| <b>33</b> | (exp incidence/ or exp multivariate analysis/ or exp odds ratio/ or exp logistic models/ or exp risk factors/ or exp epidemiologic studies/).sh.                                                                                                                                                                                                                                                                                                                                                                                                                                                                                                                                    | 1799348 |
| <b>34</b> | (exp pyelitis/ or exp pyelocystitis/ or exp pyelonephritis/ or exp urethritis/ or cystitis or urinary tract infections or exp pyuria/).sh.                                                                                                                                                                                                                                                                                                                                                                                                                                                                                                                                          | 50526   |
| <b>35</b> | (respiratory tract infections or exp bronchiolitis/ or exp bronchiolitis, viral/ or empyema, pleural or exp influenza, human/ or exp legionellosis/ or exp legionnaires' disease/ or exp lung abscess/ or exp lung diseases, fungal/ or exp lung diseases, parasitic/ or exp pneumonia/ or exp bronchopneumonia/ or exp pleuropneumonia/ or exp pneumonia, bacterial/ or exp chlamydial pneumonia/ or exp pneumonia, mycoplasma/ or exp pneumonia, pneumococcal/ or exp pneumonia, rickettsial/ or exp pneumonia, staphylococcal/ or exp pneumonia, pneumocystis/ or exp pneumonia, viral/ or exp severe acute respiratory syndrome/ or exp tracheitis/ or exp whooping cough/).sh. | 155035  |
| <b>36</b> | 1 or 2 or 3 or 4 or 5 or 28 or 29 or 30 or 31 or 34 or 35                                                                                                                                                                                                                                                                                                                                                                                                                                                                                                                                                                                                                           | 585963  |
| <b>37</b> | 27 or 33                                                                                                                                                                                                                                                                                                                                                                                                                                                                                                                                                                                                                                                                            | 2098986 |
| <b>38</b> | 32 and 36 and 37                                                                                                                                                                                                                                                                                                                                                                                                                                                                                                                                                                                                                                                                    | 5940    |
| <b>39</b> | 38 not 18 not 21 not 22 not 25 not 26                                                                                                                                                                                                                                                                                                                                                                                                                                                                                                                                                                                                                                               | 3514    |
| <b>40</b> | limit 39 to (english or french or german)                                                                                                                                                                                                                                                                                                                                                                                                                                                                                                                                                                                                                                           | 3163    |

Supplementary Table 2: Embase search strategy

|    | Search                                                                                                                                                            | Results |
|----|-------------------------------------------------------------------------------------------------------------------------------------------------------------------|---------|
| 1  | kidney failure/co, ep [Complication, Epidemiology]                                                                                                                | 13218   |
| 2  | chronic kidney failure/co, ep [Complication, Epidemiology]                                                                                                        | 10827   |
| 3  | exp proteinuria/co, ep [Complication, Epidemiology]                                                                                                               | 5456    |
| 4  | uremia/co, ep [Complication, Epidemiology]                                                                                                                        | 3030    |
| 5  | glomerulus filtration rate/                                                                                                                                       | 43185   |
| 6  | creatinine clearance/                                                                                                                                             | 17973   |
| 7  | glomerulosclerosis/co, ep [Complication, Epidemiology]                                                                                                            | 450     |
| 8  | kidney disease/co, ep [Complication, Epidemiology]                                                                                                                | 10406   |
| 9  | analgesic nephropathy/co, ep [Complication, Epidemiology]                                                                                                         | 39      |
| 10 | chronic kidney disease/co, ep [Complication, Epidemiology]                                                                                                        | 1733    |
| 11 | diabetic nephropathy/co, ep [Complication, Epidemiology]                                                                                                          | 9683    |
| 12 | allergic glomerulonephritis/co, ep [Complication, Epidemiology]                                                                                                   | 109     |
| 13 | immune complex nephritis/co, ep [Complication, Epidemiology]                                                                                                      | 77      |
| 14 | immunoglobulin A nephropathy/co, ep [Complication, Epidemiology]                                                                                                  | 678     |
| 15 | kidney amyloidosis/co, ep [Complication, Epidemiology]                                                                                                            | 228     |
| 16 | nephritis/co, ep [Complication, Epidemiology]                                                                                                                     | 1053    |
| 17 | glomerulitis/                                                                                                                                                     | 456     |
| 18 | Goodpasture syndrome/co, ep [Complication, Epidemiology]                                                                                                          | 31      |
| 19 | immune complex nephritis/co, ep [Complication, Epidemiology]                                                                                                      | 77      |
| 20 | interstitial nephritis/co, ep [Complication, Epidemiology]                                                                                                        | 901     |
| 21 | lupus erythematosus nephritis/co, ep [Complication, Epidemiology]                                                                                                 | 850     |
| 22 | nephrosis/co, ep [Complication, Epidemiology]                                                                                                                     | 189     |
| 23 | nephrotic syndrome/co, ep [Complication, Epidemiology]                                                                                                            | 2133    |
| 24 | exp glomerulopathy/co, ep [Complication, Epidemiology]                                                                                                            | 5475    |
| 25 | exp glomerulonephritis/co, ep [Complication, Epidemiology]                                                                                                        | 4296    |
| 26 | exp kidney dysfunction/co, ep [Complication, Epidemiology]                                                                                                        | 1322    |
| 27 | (creatinine* or GFR or eGFR or albuminuri* or proteinuri* or microalbuminuri* or nephropath* or glomerulo* or nephr#ti* or nephrosi* or ur?emia or ESRD or CKD or | 282722  |

|    |                                                                                                       |        |
|----|-------------------------------------------------------------------------------------------------------|--------|
| 1  |                                                                                                       |        |
| 2  |                                                                                                       |        |
| 3  |                                                                                                       |        |
| 4  | cardio-renal or Kimmelstiel-Wilson).tw.                                                               |        |
| 5  |                                                                                                       |        |
| 6  | <b>28</b> ((renal or kidney) adj4 chronic adj4 failure*).tw.                                          | 28639  |
| 7  |                                                                                                       |        |
| 8  | <b>29</b> ((renal or kidney) adj4 chronic adj4 disease*).tw.                                          | 23893  |
| 9  |                                                                                                       |        |
| 10 | <b>30</b> ((renal or kidney) adj4 chronic adj4 insufficienc*).tw.                                     | 6425   |
| 11 |                                                                                                       |        |
| 12 | <b>31</b> ((renal or kidney) adj4 chronic adj4 injury).tw.                                            | 631    |
| 13 |                                                                                                       |        |
| 14 | <b>32</b> ((renal or kidney) adj4 chronic adj4 impairment*).tw.                                       | 501    |
| 15 |                                                                                                       |        |
| 16 | <b>33</b> exp infectious pneumonia/ or bacterial pneumonia/ or chlamydial pneumonia/ or group b       |        |
| 17 | streptococcal pneumonia/ or legionnaire disease/ or mycoplasma pneumonia/ or                          |        |
| 18 | pneumocystis pneumonia/ or pulmonary candidiasis/ or severe acute respiratory                         | 50671  |
| 19 | syndrome/ or staphylococcal pneumonia/ or virus pneumonia/                                            |        |
| 20 |                                                                                                       |        |
| 21 | <b>34</b> respiratory tract infection/ or exp influenza/ or laryngotracheobronchitis/ or lower        |        |
| 22 | respiratory tract infection/ or parainfluenza virus infection/ or respiratory syncytial virus         | 106624 |
| 23 | infection/ or viral respiratory tract infection/                                                      |        |
| 24 |                                                                                                       |        |
| 25 | <b>35</b> avian influenza/                                                                            | 5081   |
| 26 |                                                                                                       |        |
| 27 | <b>36</b> chest infection/ or pertussis/                                                              | 13997  |
| 28 |                                                                                                       |        |
| 29 | <b>37</b> bronchiolitis/ or laryngotracheobronchitis/ or tracheobronchitis/                           | 10003  |
| 30 |                                                                                                       |        |
| 31 | <b>38</b> pleura empyema/                                                                             | 3703   |
| 32 |                                                                                                       |        |
| 33 | <b>39</b> pyuria/ or urinary tract infection/                                                         | 66023  |
| 34 |                                                                                                       |        |
| 35 | <b>40</b> candiduria/ or kidney infection/                                                            | 1502   |
| 36 |                                                                                                       |        |
| 37 | <b>41</b> kidney abscess/ or pyonephrosis/                                                            | 1666   |
| 38 |                                                                                                       |        |
| 39 | <b>42</b> cystitis/                                                                                   | 11865  |
| 40 |                                                                                                       |        |
| 41 | <b>43</b> pyelonephritis/ or acute pyelonephritis/                                                    | 22138  |
| 42 |                                                                                                       |        |
| 43 | <b>44</b> brain infection/ or brain abscess/ or herpes simplex encephalitis/ or herpes zoster         |        |
| 44 | encephalitis/ or subdural empyema/ or tick borne encephalitis/ or virus encephalitis/                 | 24862  |
| 45 |                                                                                                       |        |
| 46 | <b>45</b> central nervous system infection/ or epidural abscess/ or poliomyelitis/                    | 38386  |
| 47 |                                                                                                       |        |
| 48 | <b>46</b> meningitis/ or bacterial meningitis/ or exp fungal meningitis/ or haemophilus meningitis/   |        |
| 49 | or lymphocytic choriomeningitis/ or subdural empyema/ or virus meningitis/                            | 57864  |
| 50 |                                                                                                       |        |
| 51 | <b>47</b> encephalitis/ or brain ventriculitis/ or eastern equine encephalitis/ or encephalomyelitis/ |        |
| 52 | or epidemic encephalitis/ or meningoencephalitis/ or panencephalitis/ or primary amebic               | 47288  |
| 53 | meningoencephalitis/                                                                                  |        |
| 54 |                                                                                                       |        |
| 55 | <b>48</b> exp meningococcosis/                                                                        | 11231  |
| 56 |                                                                                                       |        |
| 57 | <b>49</b> exp pneumococcal infection/                                                                 | 5729   |
| 58 |                                                                                                       |        |
| 59 |                                                                                                       |        |
| 60 |                                                                                                       |        |

|    |    |                                                                                         |
|----|----|-----------------------------------------------------------------------------------------|
| 1  |    |                                                                                         |
| 2  |    |                                                                                         |
| 3  |    |                                                                                         |
| 4  | 50 | exp group b streptococcal infection/ or group b streptococcal pneumonia/ 405            |
| 5  |    |                                                                                         |
| 6  | 51 | exp bacteremia/ or staphylococcal bacteremia/ 29638                                     |
| 7  |    |                                                                                         |
| 8  | 52 | bloodstream infection/ 2518                                                             |
| 9  |    |                                                                                         |
| 10 | 53 | candidemia/ 1358                                                                        |
| 11 |    |                                                                                         |
| 12 | 54 | systemic mycosis/ or fungemia/ or invasive aspergillosis/ or invasive candidiasis/ 5182 |
| 13 |    |                                                                                         |
| 14 | 55 | sepsis/ or bacteremia/ or septic shock/ or septicemia/ or urosepsis/ 140091             |
| 15 |    |                                                                                         |
| 16 | 56 | viremia/ 12287                                                                          |
| 17 |    |                                                                                         |
| 18 | 57 | parasitemia/ 6918                                                                       |
| 19 |    |                                                                                         |
| 20 | 58 | (sepsis* or septic?emia or bacter?emia or fung?emia or pneumonia* or                    |
| 21 |    | bronchopneumonia* or pleuropneumonia* or LRTI or empy?ema or influenza* or              |
| 22 |    | legionell* or bacteriuri* or pyelonephritis or cystitis or pyelocystitis or pyelitis or |
| 23 |    | urethriti* or meningiti* or meningococc* or encephaliti* or poliomyeliti* or septic     |
| 24 |    | shock).tw. 497436                                                                       |
| 25 |    |                                                                                         |
| 26 |    |                                                                                         |
| 27 |    |                                                                                         |
| 28 | 59 | (CNS adj4 infection*).tw. 3591                                                          |
| 29 |    |                                                                                         |
| 30 | 60 | (central nervous adj4 infection*).tw. 4861                                              |
| 31 |    |                                                                                         |
| 32 | 61 | UTI.tw. 6684                                                                            |
| 33 |    |                                                                                         |
| 34 | 62 | bronchopneumonia/ 8394                                                                  |
| 35 |    |                                                                                         |
| 36 | 63 | arachnoiditis/ or aseptic meningitis/ or epidemic meningitis/ or group b streptococcal  |
| 37 |    | meningitis/ or meningoencephalitis/ or pneumococcal meningitis/ 21305                   |
| 38 |    |                                                                                         |
| 39 | 64 | exp epidemiology/ or exp incidence/ 1705072                                             |
| 40 |    |                                                                                         |
| 41 | 65 | exp risk factor/ 513022                                                                 |
| 42 |    |                                                                                         |
| 43 | 66 | exp attributable risk/ 1487                                                             |
| 44 |    |                                                                                         |
| 45 | 67 | exp hazard ratio/ 11362                                                                 |
| 46 |    |                                                                                         |
| 47 | 68 | statistical model/ 87903                                                                |
| 48 |    |                                                                                         |
| 49 | 69 | (odds adj1 ratio).tw. 101865                                                            |
| 50 |    |                                                                                         |
| 51 | 70 | (relative adj2 ratio).tw. 2736                                                          |
| 52 |    |                                                                                         |
| 53 | 71 | case report/ 1892302                                                                    |
| 54 |    |                                                                                         |
| 55 | 72 | developing country/ 71459                                                               |
| 56 |    |                                                                                         |
| 57 | 73 | developed country/ 25618                                                                |
| 58 |    |                                                                                         |
| 59 | 74 | postoperative complication/ or postoperative infection/ or surgical infection/ 272218   |
| 60 |    |                                                                                         |
|    | 75 | exp Africa/ 196804                                                                      |

|    |           |                                                                                              |
|----|-----------|----------------------------------------------------------------------------------------------|
| 1  |           |                                                                                              |
| 2  |           |                                                                                              |
| 3  |           |                                                                                              |
| 4  | <b>76</b> | argentina/ or bolivia/ or brazil/ or chile/ or colombia/ or ecuador/ or french guiana/ or    |
| 5  |           | guyana/ or paraguay/ or peru/ or suriname/ or uruguay/ or venezuela/                         |
| 6  |           | 98392                                                                                        |
| 7  | <b>77</b> | exp Central America/                                                                         |
| 8  |           | 15618                                                                                        |
| 9  | <b>78</b> | china/ or mongolia/ or philippines/                                                          |
| 10 |           | 82530                                                                                        |
| 11 | <b>79</b> | borneo/ or cambodia/ or indonesia/ or laos/ or malaysia/ or myanmar/ or papua new            |
| 12 |           | guinea/ or thailand/ or timor-leste/ or viet nam/                                            |
| 13 |           | 53670                                                                                        |
| 14 | <b>80</b> | North Korea/                                                                                 |
| 15 |           | 237                                                                                          |
| 16 | <b>81</b> | latvia/ or lithuania/                                                                        |
| 17 |           | 3316                                                                                         |
| 18 | <b>82</b> | albania/ or armenia/ or azerbaijan/ or belarus/ or "bosnia and herzegovina"/ or bulgaria/    |
| 19 |           | or "georgia (republic)"/ or "macedonia (republic)"/ or romania/ or russian federation/ or    |
| 20 |           | serbia/ or ukraine/                                                                          |
| 21 |           | 83374                                                                                        |
| 22 | <b>83</b> | USSR/                                                                                        |
| 23 |           | 50149                                                                                        |
| 24 | <b>84</b> | iran/ or iraq/ or jordan/ or lebanon/ or "turkey (republic)"/ or yemen/                      |
| 25 |           | 49920                                                                                        |
| 26 | <b>85</b> | kazakhstan/ or kyrgyzstan/ or tajikistan/ or turkmenistan/ or uzbekistan/                    |
| 27 |           | 5682                                                                                         |
| 28 | <b>86</b> | afghanistan/ or bangladesh/ or india/ or nepal/ or pakistan/ or sikkim/ or sri lanka/        |
| 29 |           | 105351                                                                                       |
| 30 | <b>87</b> | cuba/ or dominica/ or dominican republic/ or grenada/ or guadeloupe/ or haiti/ or            |
| 31 |           | jamaica/                                                                                     |
| 32 |           | 11346                                                                                        |
| 33 | <b>88</b> | fiji/ or philippines/ or polynesia/                                                          |
| 34 |           | 8607                                                                                         |
| 35 | <b>89</b> | exp Indian Ocean/                                                                            |
| 36 |           | 2505                                                                                         |
| 37 | <b>90</b> | Mexico/                                                                                      |
| 38 |           | 28748                                                                                        |
| 39 | <b>91</b> | 72 or 75 or 76 or 77 or 78 or 79 or 80 or 81 or 82 or 83 or 84 or 85 or 86 or 87 or 88 or 89 |
| 40 |           | or 90                                                                                        |
| 41 |           | 789122                                                                                       |
| 42 | <b>92</b> | exp Western Europe/                                                                          |
| 43 |           | 911511                                                                                       |
| 44 | <b>93</b> | croatia/ or czech republic/ or hungary/ or poland/ or slovakia/ or slovenia/                 |
| 45 |           | 73494                                                                                        |
| 46 | <b>94</b> | Estonia/                                                                                     |
| 47 |           | 2056                                                                                         |
| 48 | <b>95</b> | canada/ or united states/                                                                    |
| 49 |           | 1031054                                                                                      |
| 50 | <b>96</b> | japan/ or macao/                                                                             |
| 51 |           | 115065                                                                                       |
| 52 | <b>97</b> | South Korea/                                                                                 |
| 53 |           | 4982                                                                                         |
| 54 | <b>98</b> | bahrain/ or cyprus/ or israel/ or kuwait/ or oman/ or qatar/ or saudi arabia/ or united      |
| 55 |           | arab emirates/                                                                               |
| 56 |           | 37707                                                                                        |
| 57 | <b>99</b> | exp "Australia and New Zealand"/                                                             |
| 58 |           | 129186                                                                                       |
| 59 |           |                                                                                              |
| 60 |           |                                                                                              |

|    |            |                                                                                                        |
|----|------------|--------------------------------------------------------------------------------------------------------|
| 1  |            |                                                                                                        |
| 2  |            |                                                                                                        |
| 3  |            |                                                                                                        |
| 4  | <b>100</b> | brunei darussalam/ or hong kong/ or singapore/ 21427                                                   |
| 5  |            |                                                                                                        |
| 6  | <b>101</b> | 73 or 92 or 93 or 94 or 95 or 96 or 97 or 98 or 99 or 100 2259038                                      |
| 7  |            |                                                                                                        |
| 8  | <b>102</b> | 91 not (91 and 101) 710496                                                                             |
| 9  |            |                                                                                                        |
| 10 | <b>103</b> | treatment outcome/ 579285                                                                              |
| 11 |            |                                                                                                        |
| 12 | <b>104</b> | editorial/ 438527                                                                                      |
| 13 |            |                                                                                                        |
| 14 | <b>105</b> | embryo/ 177038                                                                                         |
| 15 |            |                                                                                                        |
| 16 | <b>106</b> | infant/ 533322                                                                                         |
| 17 |            |                                                                                                        |
| 18 | <b>107</b> | child/ 1295310                                                                                         |
| 19 |            |                                                                                                        |
| 20 | <b>108</b> | preschool child/ 469034                                                                                |
| 21 |            |                                                                                                        |
| 22 | <b>109</b> | school child/ 217344                                                                                   |
| 23 |            |                                                                                                        |
| 24 | <b>110</b> | adolescent/ 1180705                                                                                    |
| 25 |            |                                                                                                        |
| 26 | <b>111</b> | adult/ 4186945                                                                                         |
| 27 |            |                                                                                                        |
| 28 | <b>112</b> | 105 or 106 or 107 or 108 or 109 or 110 2546570                                                         |
| 29 |            |                                                                                                        |
| 30 | <b>113</b> | 112 not (112 and 111) 1658687                                                                          |
| 31 |            |                                                                                                        |
| 32 | <b>114</b> | animal model/ 630310                                                                                   |
| 33 |            |                                                                                                        |
| 34 | <b>115</b> | animal experiment/ 1606715                                                                             |
| 35 |            |                                                                                                        |
| 36 | <b>116</b> | nonhuman/ 3807183                                                                                      |
| 37 |            |                                                                                                        |
| 38 | <b>117</b> | animal/ 1773703                                                                                        |
| 39 |            |                                                                                                        |
| 40 | <b>118</b> | human/ 13422168                                                                                        |
| 41 |            |                                                                                                        |
| 42 | <b>119</b> | 114 or 115 or 116 or 117 5921124                                                                       |
| 43 |            |                                                                                                        |
| 44 | <b>120</b> | 119 not (119 and 118) 4747089                                                                          |
| 45 |            |                                                                                                        |
| 46 | <b>121</b> | pneumonia/ 97950                                                                                       |
| 47 |            |                                                                                                        |
| 48 | <b>122</b> | lung infection/ or hantavirus pulmonary syndrome/ or lung abscess/ or viral bronchiolitis/ 21795       |
| 49 |            |                                                                                                        |
| 50 | <b>123</b> | (respiratory adj3 infection*).tw. 43371                                                                |
| 51 |            |                                                                                                        |
| 52 | <b>124</b> | (lower respiratory adj3 infection*).tw. 6553                                                           |
| 53 |            |                                                                                                        |
| 54 | <b>125</b> | (urinary adj3 infection*).tw. 44177                                                                    |
| 55 |            |                                                                                                        |
| 56 | <b>126</b> | (upper urinary adj3 infection*).tw. 444                                                                |
| 57 |            |                                                                                                        |
| 58 | <b>127</b> | (epidemiolog\$ or incidence).tw. 878025                                                                |
| 59 |            |                                                                                                        |
| 60 | <b>128</b> | (relative adj risk*).tw. 55195                                                                         |
|    | <b>129</b> | 1 or 2 or 3 or 4 or 5 or 6 or 7 or 8 or 9 or 10 or 11 or 12 or 13 or 14 or 15 or 16 or 17 or 18 364340 |



|    |            |                                                                                              |
|----|------------|----------------------------------------------------------------------------------------------|
| 1  |            |                                                                                              |
| 2  |            |                                                                                              |
| 3  |            |                                                                                              |
| 4  |            | or 19 or 20 or 21 or 22 or 23 or 24 or 25 or 26 or 27 or 28 or 29 or 30 or 31 or 32          |
| 5  |            |                                                                                              |
| 6  | <b>130</b> | 33 or 34 or 35 or 36 or 37 or 38 or 39 or 40 or 41 or 42 or 43 or 44 or 45 or 46 or 47 or 48 |
| 7  |            | or 49 or 50 or 51 or 52 or 53 or 54 or 55 or 56 or 57 or 58 or 59 or 60 or 61 or 62 or 63 or |
| 8  |            | 121 or 122 or 123 or 124 or 125 or 126                                                       |
| 9  |            |                                                                                              |
| 10 |            |                                                                                              |
| 11 | <b>131</b> | 64 or 65 or 66 or 67 or 68 or 69 or 70 or 127 or 128                                         |
| 12 |            | 2659100                                                                                      |
| 13 | <b>132</b> | 129 and 130 and 131                                                                          |
| 14 |            | 7357                                                                                         |
| 15 | <b>133</b> | 132 not 120 not 113 not 104 not 71 not 74 not 102                                            |
| 16 |            | 4970                                                                                         |
| 17 | <b>134</b> | limit 133 to (english or french or german)                                                   |
| 18 |            | 4602                                                                                         |
| 19 | <b>135</b> | limit 134 to embase                                                                          |
| 20 |            | 4247                                                                                         |
| 21 |            |                                                                                              |
| 22 |            |                                                                                              |
| 23 |            |                                                                                              |
| 24 |            |                                                                                              |
| 25 |            |                                                                                              |
| 26 |            |                                                                                              |
| 27 |            |                                                                                              |
| 28 |            |                                                                                              |
| 29 |            |                                                                                              |
| 30 |            |                                                                                              |
| 31 |            |                                                                                              |
| 32 |            |                                                                                              |
| 33 |            |                                                                                              |
| 34 |            |                                                                                              |
| 35 |            |                                                                                              |
| 36 |            |                                                                                              |
| 37 |            |                                                                                              |
| 38 |            |                                                                                              |
| 39 |            |                                                                                              |
| 40 |            |                                                                                              |
| 41 |            |                                                                                              |
| 42 |            |                                                                                              |
| 43 |            |                                                                                              |
| 44 |            |                                                                                              |
| 45 |            |                                                                                              |
| 46 |            |                                                                                              |
| 47 |            |                                                                                              |
| 48 |            |                                                                                              |
| 49 |            |                                                                                              |
| 50 |            |                                                                                              |
| 51 |            |                                                                                              |
| 52 |            |                                                                                              |
| 53 |            |                                                                                              |
| 54 |            |                                                                                              |
| 55 |            |                                                                                              |
| 56 |            |                                                                                              |
| 57 |            |                                                                                              |
| 58 |            |                                                                                              |
| 59 |            |                                                                                              |
| 60 |            |                                                                                              |

Supplementary Table 3: Cochrane library search strategy

|   | Search                                                                                                                                                                                                                                                                                                                                                                                                                                                                                                                                                                                                                                                                                                                                                                                                                                                                                                                                                                                                                                                                                                                                                                                                                                                                                                                        | Results |
|---|-------------------------------------------------------------------------------------------------------------------------------------------------------------------------------------------------------------------------------------------------------------------------------------------------------------------------------------------------------------------------------------------------------------------------------------------------------------------------------------------------------------------------------------------------------------------------------------------------------------------------------------------------------------------------------------------------------------------------------------------------------------------------------------------------------------------------------------------------------------------------------------------------------------------------------------------------------------------------------------------------------------------------------------------------------------------------------------------------------------------------------------------------------------------------------------------------------------------------------------------------------------------------------------------------------------------------------|---------|
| 1 | sepsis* or septic*mia or bacter*mia or fung*mia or pneumonia* or bronchopneumonia* or pleuropneumonia* or LRTI or empy*ma or influenza* or legionell* or bacteriuri* or pyelonephriti* or cystitis* or pyelocystitis* or pyelitis* or urethriti* or UTI or meningiti* or meningococc* or encephaliti* or poliomyeliti* or "septic shock"                                                                                                                                                                                                                                                                                                                                                                                                                                                                                                                                                                                                                                                                                                                                                                                                                                                                                                                                                                                      | 19098   |
| 2 | CNS near/4 infection*                                                                                                                                                                                                                                                                                                                                                                                                                                                                                                                                                                                                                                                                                                                                                                                                                                                                                                                                                                                                                                                                                                                                                                                                                                                                                                         | 47      |
| 3 | "central nervous" near/4 infection*                                                                                                                                                                                                                                                                                                                                                                                                                                                                                                                                                                                                                                                                                                                                                                                                                                                                                                                                                                                                                                                                                                                                                                                                                                                                                           | 92      |
| 4 | [mh "cerebral phaeohyphomycosis"] or [mh ^"central nervous system infections"] or [mh "brain abscess"] or [mh "toxoplasmosis, cerebral"] or [mh ^"central nervous system bacterial infections"] or [mh "empyema, subdural"] or [mh "epidural abscess"] or [mh "lyme neuroborreliosis"] or [mh "meningitis, bacterial"] or [mh "meningitis, escherichia coli"] or [mh "meningitis, haemophilus"] or [mh "meningitis, listeria"] or [mh "meningitis, meningococcal"] or [mh "meningitis, pneumococcal"] or [mh "central nervous system fungal infections"] or [mh "meningitis, fungal"] or [mh "meningitis, cryptococcal"] or [mh neuroaspergillosis] or [mh ^"central nervous system viral diseases"] or [mh encephalitis] or [mh "encephalitis, viral"] or [mh "encephalitis, arbovirus"] or [mh "encephalitis, california"] or [mh "encephalitis, japanese"] or [mh "encephalitis, st. louis"] or [mh "encephalitis, tick-borne"] or [mh "west nile fever"] or [mh "encephalitis, herpes simplex"] or [mh "encephalitis, varicella zoster"] or [mh "encephalomyelitis, equine"] or [mh "meningitis, viral"] or [mh "lymphocytic choriomeningitis"] or [mh "meningitis, aseptic"] or [mh "paraparesis, tropical spastic"] or [mh ^poliomyelitis] or [mh "poliomyelitis, bulbar"] or [mh encephalomyelitis] or [mh meningitis] | 1015    |
| 5 | [mh "endocarditis, bacterial"] or [mh "endocarditis, subacute bacterial"] or [mh "pneumococcal infections"] or [mh ^"catheter-related infections"] or [mh coinfection] or [mh ^"communicable diseases"] or [mh "community-acquired infections"] or [mh sepsis] or [mh bacteremia] or [mh "hemorrhagic septicemia"] or [mh fungemia] or [mh "shock, septic"] or [mh empyema] or [mh viremia] or [mh parasitemia]                                                                                                                                                                                                                                                                                                                                                                                                                                                                                                                                                                                                                                                                                                                                                                                                                                                                                                               | 4033    |
| 6 | respiratory near/3 infection*                                                                                                                                                                                                                                                                                                                                                                                                                                                                                                                                                                                                                                                                                                                                                                                                                                                                                                                                                                                                                                                                                                                                                                                                                                                                                                 | 4398    |
| 7 | urinary near/3 infection*                                                                                                                                                                                                                                                                                                                                                                                                                                                                                                                                                                                                                                                                                                                                                                                                                                                                                                                                                                                                                                                                                                                                                                                                                                                                                                     | 3732    |
| 8 | [mh pyelitis] or [mh pyelocystitis] or [mh pyelonephritis] or [mh urethritis] or [mh ^cystitis] or [mh ^"urinary tract infections"] or [mh pyuria]                                                                                                                                                                                                                                                                                                                                                                                                                                                                                                                                                                                                                                                                                                                                                                                                                                                                                                                                                                                                                                                                                                                                                                            | 2143    |
| 9 | [mh ^"respiratory tract infections"] or [mh bronchiolitis] or [mh "bronchiolitis, viral"] or [mh ^"empyema, pleural"] or [mh "influenza, human"] or [mh legionellosis] or [mh                                                                                                                                                                                                                                                                                                                                                                                                                                                                                                                                                                                                                                                                                                                                                                                                                                                                                                                                                                                                                                                                                                                                                 | 5402    |

1  
2  
3  
4  
5  
6  
7  
8  
9  
10  
11  
12  
13  
14  
15  
16  
17  
18  
19  
20  
21  
22  
23  
24  
25  
26  
27  
28  
29  
30  
31  
32  
33  
34  
35  
36  
37  
38  
39  
40  
41  
42  
43  
44  
45  
46  
47  
48  
49  
50  
51  
52  
53  
54  
55  
56  
57  
58  
59  
60

|    |                                                                                                                                                                                                                                                                                                                                                                                                                                                                                                                                                     |        |
|----|-----------------------------------------------------------------------------------------------------------------------------------------------------------------------------------------------------------------------------------------------------------------------------------------------------------------------------------------------------------------------------------------------------------------------------------------------------------------------------------------------------------------------------------------------------|--------|
|    | "legionnaires' disease"] or [mh "lung abscess"] or [mh "lung diseases, fungal"] or exp [mh "lung diseases, parasitic"] or [mh pneumonia] or [mh bronchopneumonia] or [mh pleuropneumonia] or [mh "pneumonia, bacterial"] or [mh "chlamydial pneumonia"] or [mh "pneumonia, mycoplasma"] or [mh "pneumonia, pneumococcal"] or [mh "pneumonia, rickettsial"] or [mh "pneumonia, staphylococcal"] or [mh "pneumonia, pneumocystis"] or [mh "pneumonia, viral"] or [mh "severe acute respiratory syndrome"] or [mh tracheitis] or [mh "whooping cough"] |        |
| 10 | (renal or kidney) near/4 chronic near/4 failure*                                                                                                                                                                                                                                                                                                                                                                                                                                                                                                    | 4476   |
| 11 | (renal or kidney) near/4 chronic near/4 disease*                                                                                                                                                                                                                                                                                                                                                                                                                                                                                                    | 1647   |
| 12 | (renal or kidney) near/4 chronic near/4 insufficienc*                                                                                                                                                                                                                                                                                                                                                                                                                                                                                               | 510    |
| 13 | (renal or kidney) near/4 chronic near/4 injury                                                                                                                                                                                                                                                                                                                                                                                                                                                                                                      | 29     |
| 14 | (renal or kidney) near/4 chronic near/4 impairment*                                                                                                                                                                                                                                                                                                                                                                                                                                                                                                 | 34     |
| 15 | creatinine* or GFR or eGFR or albuminuri* or proteinuri* or microalbuminuri* or nephropath* or glomerulo* or nephr?ti* or nephrosi* or ur*mia or ESRD or CKD or cardio-renal or Kimmelstiel-Wilson                                                                                                                                                                                                                                                                                                                                                  | 16810  |
| 16 | [mh ^creatinine/BL]                                                                                                                                                                                                                                                                                                                                                                                                                                                                                                                                 | 2042   |
| 17 | [mh ^"kidney diseases"/CO,EP]                                                                                                                                                                                                                                                                                                                                                                                                                                                                                                                       | 341    |
| 18 | [mh "diabetic nephropathies"] or [mh "hypertension, renal"] or [mh nephritis] or [mh "anti-glomerular basement membrane disease"] or [mh "glomerulonephritis, iga"] or [mh "glomerulonephritis, membranoproliferative"] or [mh "glomerulonephritis, membranous"] or [mh "lupus nephritis"] or [mh nephrosclerosis] or [mh nephrosis] or [mh "renal insufficiency"] or [mh "cardio-renal syndrome"] or [mh uremia] or [mh azotemia] or [mh proteinuria]                                                                                              | 7117   |
| 19 | [mh ^"kidney function tests"] or [mh "glomerular filtration rate"]                                                                                                                                                                                                                                                                                                                                                                                                                                                                                  | 2417   |
| 20 | {or #1-#9}                                                                                                                                                                                                                                                                                                                                                                                                                                                                                                                                          | 25511  |
| 21 | {or #10-#19}                                                                                                                                                                                                                                                                                                                                                                                                                                                                                                                                        | 21120  |
| 22 | {and #20-#21}                                                                                                                                                                                                                                                                                                                                                                                                                                                                                                                                       | 1422   |
| 23 | incidence* or "odds ratio" or "risk ratio" or "risk factor" or "relative risk"                                                                                                                                                                                                                                                                                                                                                                                                                                                                      | 69239  |
| 24 | [mh incidence] or [mh "multivariate analysis"] or [mh "odds ratio"] or [mh "logistic models"] or [mh "risk factors"] or [mh "epidemiologic studies"]                                                                                                                                                                                                                                                                                                                                                                                                | 122866 |
| 25 | {or #23-#24}                                                                                                                                                                                                                                                                                                                                                                                                                                                                                                                                        | 165844 |
| 26 | {and #22, #25}                                                                                                                                                                                                                                                                                                                                                                                                                                                                                                                                      | 953    |

**Supplementary Table 4:** Inclusion and exclusion criteria for determining study eligibility

|                             | <b>Included</b>                                                                                                                                                                                                                                                                                                                                                                                                                                   | <b>Excluded</b>                                                                                                                                                                                                                                                                               |
|-----------------------------|---------------------------------------------------------------------------------------------------------------------------------------------------------------------------------------------------------------------------------------------------------------------------------------------------------------------------------------------------------------------------------------------------------------------------------------------------|-----------------------------------------------------------------------------------------------------------------------------------------------------------------------------------------------------------------------------------------------------------------------------------------------|
| <b>Participants</b>         | Adult human participants.                                                                                                                                                                                                                                                                                                                                                                                                                         | Populations exclusively of:<br>- pregnant women;<br>- kidney transplant recipients or patients receiving renal replacement therapy;<br>- patient groups usually managed in secondary care unless this was for chronic kidney disease, or routinely treated with immunosuppressive medication. |
| <b>Study settings</b>       | High income countries (World Bank classification).(13)<br>Community settings, including adults living in institutional care.                                                                                                                                                                                                                                                                                                                      |                                                                                                                                                                                                                                                                                               |
| <b>Exposure of interest</b> | Chronic acquired kidney disease, indicated by any of the following:<br>- medical diagnosis;<br>- reduced estimated glomerular filtration rate;<br>- reduced creatinine clearance;<br>- elevated creatinine;<br>- proteinuria, micro- or macro-albuminuria;<br>- renal structural abnormalities.<br><br>Where there was no 'unexposed' group without kidney disease, comparison between stages 1-2 and stages 3-5 CKD was accepted.                |                                                                                                                                                                                                                                                                                               |
| <b>Outcomes of interest</b> | Incidence rate ratio, risk ratio or odds ratio estimates of the effect of kidney disease on any of the following community-acquired acute infections:<br>- lower respiratory tract infections;<br>- urinary tract infections (UTIs);<br>- central nervous system infections;<br>- sepsis.<br><br>Urinary catheter-associated UTIs from community settings, and incidence of severe disease (such as hospitalisation for infection) were accepted. | Outcomes not accepted:<br>- infection prevalence;<br>- hospital-associated infection rates;<br>- post-operative follow up outcomes;<br>- incidence of infection-related mortality;<br>- prognosis among infected patients.                                                                    |
| <b>Study methodology</b>    | Trials, case-control studies, cohort studies or other observational study designs containing original data.<br><br>Relevant review articles without original data were identified for reference list screening.                                                                                                                                                                                                                                   | Case reports.<br>Descriptive studies without a comparison group.<br><br>Studies with fewer than 30 participants in either the exposed or unexposed categories.                                                                                                                                |
| <b>Publication details</b>  | Any publication date.<br>Languages: English, German, French.                                                                                                                                                                                                                                                                                                                                                                                      |                                                                                                                                                                                                                                                                                               |

Supplementary Table 5: Quality assessment of studies including rationale (n=14)

1  
2  
3  
4  
5  
6  
7  
8  
9  
10  
11  
12  
13  
14  
15  
16  
17  
18  
19  
20  
21  
22  
23  
24  
25  
26  
27  
28  
29  
30  
31  
32  
33  
34  
35  
36  
37  
38  
39  
40  
41  
42  
43  
44  
45  
46  
47

|                                                                    | Case-control studies                                                           |                                                                                |                                                                                        |                                                                                            | Cohort studies                                                                                          |                                                                                |                                                   |                                                  |                                                   |                                                   |                                                   |                                                   |                                                                                |                                                                                    |
|--------------------------------------------------------------------|--------------------------------------------------------------------------------|--------------------------------------------------------------------------------|----------------------------------------------------------------------------------------|--------------------------------------------------------------------------------------------|---------------------------------------------------------------------------------------------------------|--------------------------------------------------------------------------------|---------------------------------------------------|--------------------------------------------------|---------------------------------------------------|---------------------------------------------------|---------------------------------------------------|---------------------------------------------------|--------------------------------------------------------------------------------|------------------------------------------------------------------------------------|
|                                                                    | Vinogradova 2009 (16)                                                          | Watt 2007 (17)                                                                 | Loeb 2009 (18)                                                                         | Schnoor 2007 (19)                                                                          | Higgins 1989 (22)                                                                                       | Hackam 2006 (24)                                                               | Dalrymple 2012 (23)                               | Karunajeewa 2005 (25)                            | James 2008 (26)                                   | James 2009 (27)                                   | Wang 2012 (28)                                    | Caljouw 2011 (29)                                 | Campbell 2011 * (21)                                                           | USRDS 2010(20)                                                                     |
| <b>Selection bias</b>                                              |                                                                                |                                                                                |                                                                                        |                                                                                            |                                                                                                         |                                                                                |                                                   |                                                  |                                                   |                                                   |                                                   |                                                   |                                                                                |                                                                                    |
| Selection of controls <sup>1</sup>                                 | Low: matched selection of primary care registered patients                     | Low: neighbourhood controls selected systematically by proximity               | Low: random digit dialling of hospital catchment area residents                        | Low: random selection from population register                                             | N/A: cohort study                                                                                       | N/A: cohort study                                                              | N/A: cohort study                                 | N/A: cohort study                                | N/A: cohort study                                 | N/A: cohort study                                 | N/A: cohort study                                 | N/A: cohort study                                 | N/A: cohort study                                                              | N/A: cohort study                                                                  |
| Participation bias <sup>2</sup>                                    | Low: automatic participation                                                   | Low: participation 83% of cases, 84% of controls                               | Uncertain: participation rate not reported                                             | High: Participation <60% overall                                                           | N/A: cohort study                                                                                       | N/A: cohort study                                                              | N/A: cohort study                                 | N/A: cohort study                                | N/A: cohort study                                 | N/A: cohort study                                 | N/A: cohort study                                 | N/A: cohort study                                 | N/A: cohort study                                                              | N/A: cohort study                                                                  |
| Loss to follow up <sup>3</sup>                                     | N/A: case-control study                                                        | N/A: case-control study                                                        | N/A: case-control study                                                                | N/A: case-control study                                                                    | Uncertain: not reported and clinically determined. May be differential, but study period only one year. | Low: automated follow up                                                       | Low: >80% follow up                               | Low: automated follow up                         | Low: automated follow up                          | Low: automated follow up                          | Low: automated follow up                          | Low: >80% follow-up                               | Low: followed up 479 of 551 participants alive aged 86 years: 86% follow up    | Low: active case-finding applied to national census figure (no follow up required) |
| <b>Non-differential misclassification of exposure <sup>4</sup></b> | High: relies on medical diagnosis of chronic renal disease in medical records. | High: relied on medical diagnosis of chronic renal disease in medical records. | High: ascertained medical diagnosis of chronic renal disease in participant interview. | High: ascertained medical diagnosis of chronic renal disease in questionnaire for controls | Uncertain: not reported when creatinine measured.                                                       | High: relies on medical diagnosis of chronic renal disease in medical records. | Low: determined prospectively from blood results  | Low: determined prospectively from test results  | Low: determined prospectively from blood results  | High: relies on medical diagnosis of chronic renal disease in medical records. | High: relies on medical diagnosis of chronic renal disease in insurance claims     |
| <b>Information bias: exposure recall bias <sup>5</sup></b>         |                                                                                |                                                                                |                                                                                        |                                                                                            |                                                                                                         |                                                                                |                                                   |                                                  |                                                   |                                                   |                                                   |                                                   |                                                                                |                                                                                    |
|                                                                    | Low: kidney disease diagnosis ascertained from pre-                            | Low: kidney disease diagnosis ascertained from pre-                            | High: ascertained diagnosis of kidney                                                  | High: ascertained medical diagnosis of kidney                                              | Low: determined from serum creatinine with clear                                                        | Low: kidney disease diagnosis ascertained from pre-                            | Low: determined prospectively from blood results. | Low: determined prospectively from test results. | Low: determined prospectively from blood results. | Low: kidney disease diagnosis ascertained from pre-                            | Low: kidney disease diagnosis ascertained from pre-                                |

|                                    |                                                                                     |                                                                                                                                        |                                                                                                                   |                                                                                                        |                                                                                                     |                                                                                                                                                                                   |                                                           |                                                                       |                                                                                                                             |                                                                                                                            |                                                           |                                                           |                                                                                                        |                                                               |
|------------------------------------|-------------------------------------------------------------------------------------|----------------------------------------------------------------------------------------------------------------------------------------|-------------------------------------------------------------------------------------------------------------------|--------------------------------------------------------------------------------------------------------|-----------------------------------------------------------------------------------------------------|-----------------------------------------------------------------------------------------------------------------------------------------------------------------------------------|-----------------------------------------------------------|-----------------------------------------------------------------------|-----------------------------------------------------------------------------------------------------------------------------|----------------------------------------------------------------------------------------------------------------------------|-----------------------------------------------------------|-----------------------------------------------------------|--------------------------------------------------------------------------------------------------------|---------------------------------------------------------------|
|                                    | existing medical records                                                            | existing medical records                                                                                                               | disease in participant interview in hospital for cases and at home for controls                                   | disease at home for controls                                                                           | cut-off (objective measure)                                                                         | existing medical records                                                                                                                                                          |                                                           |                                                                       |                                                                                                                             |                                                                                                                            |                                                           |                                                           | existing medical records                                                                               | existing insurance records                                    |
| Observer bias <sup>6</sup>         | Low: used pre-specified codes to define kidney disease status                       | Uncertain: Medical record abstractors not blinded to case-control status and criteria for assigning kidney disease status not reported | High: interviewers aware of case status (interviewed in hospital) or control status (telephone interview at home) | High: decision to list diagnosis of kidney disease in case report made in context of illness for cases | Low: determined from serum creatinine with clear cut-off (objective measure)                        | Uncertain: source of kidney disease status data not reported. If hospital records are used, decision to list diagnosis in discharge record made in context of illness for cases.  | Low: determined from serum cystatin C (objective measure) | Low: determined from blood and urine test results (objective measure) | Low: determined from serum creatinine (objective measure)                                                                   | Low: determined from serum creatinine (objective measure)                                                                  | Low: determined from serum creatinine (objective measure) | Low: determined from serum creatinine (objective measure) | High: decision to list diagnosis of kidney disease in case report made in context of illness for cases | Low: used pre-specified codes to define kidney disease status |
| Ascertainment <sup>7</sup>         | Low: chronic kidney disease diagnosis would have to predate current acute infection | Low: chronic kidney disease diagnosis would have to predate current acute infection                                                    | Low: chronic kidney disease diagnosis would have to predate current acute infection                               | High: ascertainment entirely different for cases than controls                                         | Uncertain: not reported when creatinine measured, or whether this is recurrent/ prompted by illness | Uncertain: source of kidney disease status data not reported. If hospital records used, patients with infection-related hospitalisations more likely to have CKD status recorded. | Low: all participants tested at baseline.                 | Low: participants monitored annually.                                 | Low: baseline measure used (that only patients with a result were eligible was considered a limitation to generalisability) | Low: sensitivity analysis using only the baseline creatinine test found similar results to the last-carried forward method | Low: all participants tested at baseline.                 | Low: all participants tested at baseline.                 | High: ascertainment entirely different for cases than non-cases                                        | Low: kidney disease status ascertained in year prior to study |
| Non-differential misclassification | Low: medical diagnosis of severe                                                    | Low: active surveillance with clear                                                                                                    | Low: severe outcome with clear                                                                                    | Low: severe outcome with clear                                                                         | Uncertain: methods for ascertaining                                                                 | Low: severe outcome with widely                                                                                                                                                   | Low: severe outcome with clear                            | Low: severe outcome with widely                                       | Low: severe outcome with clear                                                                                              | Low: severe outcome with widely                                                                                            | Low: severe outcome with clear                            | Uncertain: kidney disease                                 | Uncertain: sending of PCR test                                                                         | Low: severe outcome unlikely to                               |

1  
2  
3  
4  
5  
6  
7  
8  
9  
10  
11  
12  
13  
14  
15  
16  
17  
18  
19  
20  
21  
22  
23  
24  
25  
26  
27  
28  
29  
30  
31  
32  
33  
34  
35  
36  
37  
38  
39  
40  
41  
42  
43  
44  
45  
46  
47

|                                     |                                                                                                          |                                                                                                         |                                                                                       |                                                                                                       |                                                                                                              |                                                                                                    |                                                                                                    |                                                                                                    |                                                                                                |                                                                                                    |                                                                                       |                                                                                                                                                          |                                                                                         |                                                                                                    |
|-------------------------------------|----------------------------------------------------------------------------------------------------------|---------------------------------------------------------------------------------------------------------|---------------------------------------------------------------------------------------|-------------------------------------------------------------------------------------------------------|--------------------------------------------------------------------------------------------------------------|----------------------------------------------------------------------------------------------------|----------------------------------------------------------------------------------------------------|----------------------------------------------------------------------------------------------------|------------------------------------------------------------------------------------------------|----------------------------------------------------------------------------------------------------|---------------------------------------------------------------------------------------|----------------------------------------------------------------------------------------------------------------------------------------------------------|-----------------------------------------------------------------------------------------|----------------------------------------------------------------------------------------------------|
| Information on outcome <sup>8</sup> | outcome                                                                                                  | criteria                                                                                                | criteria                                                                              | criteria                                                                                              | infection not reported                                                                                       | accepted clinical criteria                                                                         | criteria                                                                                           | accepted clinical criteria                                                                         | criteria                                                                                       | accepted clinical criteria                                                                         | criteria                                                                              | status may affect healthcare attendance for minor illness such as UTI                                                                                    | during influenza pandemic vulnerable to be influenced by kidney disease status          | be missed                                                                                          |
| Information on bias: outcome        |                                                                                                          |                                                                                                         |                                                                                       |                                                                                                       |                                                                                                              |                                                                                                    |                                                                                                    |                                                                                                    |                                                                                                |                                                                                                    |                                                                                       |                                                                                                                                                          |                                                                                         |                                                                                                    |
| Recall bias <sup>9</sup>            | Low: cases identified from medical records based on GP diagnosis                                         | Low: cases identified by laboratory surveillance                                                        | Low: cases determined by medical diagnosis in hospital                                | Low: Low: realtime reporting system through established surveillance network                          | Uncertain: methods for ascertaining infection not reported                                                   | Low: monitoring of all hospital discharge reports                                                  | Low: semi-annual cohort monitoring                                                                 | Low: monitoring of all hospital discharge reports                                                  | Low: monitoring of all biochemistry results                                                    | Low: monitoring of all hospital discharge reports                                                  | Low: semi-annual cohort monitoring                                                    | Low: annual clinician interviews supplemented with medical record review                                                                                 | Low: realtime case finding system through laboratory results                            | Low: monitoring of all hospital insurance claims                                                   |
| Observer bias <sup>10</sup>         | Low: clinical diagnosis of severe outcome unlikely to be severely affected by kidney disease comorbidity | Low: Laboratory based surveillance system with clear criteria for cases                                 | Low: CKD status unlikely to severely affect physician application of clear criteria   | Low: surveillance system with clear criteria for cases                                                | Uncertain: standard definition of APN is vague and not reported whether any observer blinded to renal status | Low: kidney disease status unlikely to affect choice of hospital diagnosis code for severe outcome | Low: kidney disease status unlikely to affect choice of hospital diagnosis code for severe outcome | Low: kidney disease status unlikely to affect choice of hospital diagnosis code for severe outcome | Low: objective definition of outcome independent of exposure status                            | Low: kidney disease status unlikely to affect choice of hospital diagnosis code for severe outcome | Low: CKD status unlikely to severely affect application of clear criteria             | Low: kidney disease status unlikely to strongly influence diagnosis of UTI at age 86-89 years, given case criteria include symptoms and urinary analysis | Low: objective criteria for cases once tested                                           | Low: kidney disease status unlikely to affect choice of hospital diagnosis code for severe outcome |
| Ascertainment <sup>11</sup>         | Low: kidney disease status unlikely to affect primary care attendance with severe outcome                | Low: active surveillance with clear criteria, testing for IPD unlikely to be markedly influenced by CKD | Low: kidney disease status unlikely to affect hospital attendance with severe outcome | Low: kidney disease status unlikely to affect primary care or hospital attendance with severe outcome | Uncertain: methods for ascertaining infection not reported                                                   | Low: kidney disease status unlikely to affect diagnosis of severe outcome with widely accepted     | Low: kidney disease status unlikely to affect hospital attendance with severe outcome              | Low: kidney disease status unlikely to affect hospital attendance with severe outcome              | Low: sending of blood culture unlikely to be influenced by kidney disease in context of severe | Low: kidney disease status unlikely to affect diagnosis of severe outcome with widely accepted     | Low: kidney disease status unlikely to affect hospital attendance with severe outcome | Uncertain: kidney disease status may affect healthcare attendance for minor illness such as UTI                                                          | Uncertain: sending of PCR test during influenza pandemic vulnerable to be influenced by | Low: kidney disease status unlikely to affect hospital attendance with severe outcome              |

1  
2  
3  
4  
5  
6  
7  
8  
9  
10  
11  
12  
13  
14  
15  
16  
17  
18  
19  
20  
21  
22  
23  
24  
25  
26  
27  
28  
29  
30  
31  
32  
33  
34  
35  
36  
37  
38  
39  
40  
41  
42  
43  
44  
45  
46  
47

|                                        |                                                                                                                                 |                                                                                                     |                                                                                |                                                                |                                                                                                 |                                                                                                            |                                                                                                |                                             |                                                                                           |                                                                                                             |                                                                                             |                                                       |                                                                |                                                               |
|----------------------------------------|---------------------------------------------------------------------------------------------------------------------------------|-----------------------------------------------------------------------------------------------------|--------------------------------------------------------------------------------|----------------------------------------------------------------|-------------------------------------------------------------------------------------------------|------------------------------------------------------------------------------------------------------------|------------------------------------------------------------------------------------------------|---------------------------------------------|-------------------------------------------------------------------------------------------|-------------------------------------------------------------------------------------------------------------|---------------------------------------------------------------------------------------------|-------------------------------------------------------|----------------------------------------------------------------|---------------------------------------------------------------|
|                                        |                                                                                                                                 | status in context of known high incidence among the Navajo Nation                                   |                                                                                |                                                                |                                                                                                 | clinical criteria                                                                                          |                                                                                                |                                             | illness                                                                                   | clinical                                                                                                    |                                                                                             |                                                       | comorbidities                                                  |                                                               |
| <b>Confounding</b>                     | Low: controls matched to cases on age and sex, estimate adjusted for wide range of confounders including diabetes <sup>13</sup> | Low: controls matched for age and sex. Diabetes eligible for inclusion in final model <sup>14</sup> | Low: Age, sex and diabetes eligible for inclusion in final model <sup>15</sup> | High: unadjusted                                               | High: unadjusted estimate. In particular, high immunosuppressant use among the study population | Low: adjusted for age, sex, nature of index event, charlson index, healthcare use, and other comorbidities | Low: adjusted for age, sex, race, smoking, BMI, diabetes mellitus, and multiple comorbidities. | High: no adjustment for sex <sup>16</sup>   | Low: adjusted for age, sex, diabetes, comorbidity score, care in a dedicated renal clinic | Low: adjusted for age, sex, socio-economic status, ethnicity, diabetes mellitus, Charlson comorbidity score | High: adjusted for age, sex, alcohol, smoking and demographic factors but no comorbidities. | High: no adjustment for sex or diabetes <sup>17</sup> | High: adjusted for age only                                    | High: unadjusted <sup>19</sup>                                |
| <b>Reverse Causation</b> <sup>18</sup> | Low: pre-existing kidney disease reported at time of infection                                                                  | Low: pre-existing kidney disease reported at time of infection                                      | Low: pre-existing kidney disease reported at time of infection                 | Low: pre-existing kidney disease reported at time of infection | Uncertain: Timing of creatinine measurement relative to infections not specified                | Low: chronic renal failure should not be diagnosed within one hospital episode for infection               | Low: baseline serum cystatin C used                                                            | Low: serum biochemistry tested at screening | Low: baseline creatinine used                                                             | Low: only followed to first outcome event, creatinine result predates qualifying infection                  | Low: baseline creatinine used                                                               | Low: baseline creatinine used                         | Low: pre-existing kidney disease reported at time of infection | Low: kidney disease status established in year prior to study |

\*The unusual design of the artificial cohort study by Campbell *et al.* is worth clarification. During the 2009–2010 influenza pandemic, hospitalised cases of laboratory confirmed pandemic influenza A (H1N1) were reported by a laboratory-based national surveillance system. The surveillance report, completed by the microbiologist, asked whether the case had a diagnosis of CKD. Denominators for infection rates were obtained from primary care registers of patients eligible for pandemic influenza vaccination by virtue of a CKD diagnosis (for CKD): and from the national census (for non-CKD).<sup>(29)</sup> The effect of CKD on influenza may be overestimated in this study, because CKD was advertised as a possible risk factor for pandemic influenza to encourage vaccine uptake among this group, and patients with flu-like symptoms could have been more likely to attend hospital or be tested for pandemic influenza A (H1N1) if they had a diagnosis of CKD.

- 1. High risk: probability of selection as a control likely to be affected by kidney disease status (known or unknown).
- Low risk: controls selected using random sampling (or other system unlikely to be biased by kidney disease status) from the population from which the cases arose.



- 1
- 2
- 3
- 4 2. Low risk: (1) automated participation (e.g. medical record review), or (2)  $\geq 80\%$  participation, or (3) 70-80% participation with a comparison (min age, sex,
- 5 death/morbidity) showing similar characteristics between those included and those not included in the study.
- 6 3. Low risk: (1) automated follow up (e.g. through record linkage), or (2)  $\geq 80\%$  follow up, or (3) 70-80% follow up with a comparison (min age, sex,
- 7 death/morbidity) showing similar characteristics between those included and those not included in the study.
- 8 4. High risk: allocation of kidney disease status relies on existing kidney disease having been diagnosed as part of routine medical care.
- 9 Low risk: All members of study assessed for kidney disease at baseline.
- 10 5. High risk: kidney disease status defined by patient recall of CKD diagnosis in context of recent infection.
- 11 6. High risk: kidney disease status defined by observer unblinded to case status, without clear objective criteria to apply.
- 12 7. High risk: participants with infections are more or less likely to be tested for kidney disease.
- 13 8. Low risk: Active screening for infection, or severe outcome unlikely to be missed or presents validation results of  $>70\%$  sensitivity and specificity
- 14 9. High risk: infection status defined by patient recall of infection in context of kidney disease e.g. participants with kidney disease asked to recall infections
- 15 while at renal clinic.
- 16 10. High risk: infection status defined by observer in context likely to be influenced by kidney disease status (assumed that clinical diagnosis of severe
- 17 infections was unlikely to be strongly influenced by awareness of CKD as a comorbidity but that less severe infections may be influenced by this in the
- 18 absence of clear diagnostic criteria).
- 19 11. High risk: ascertainment of infections likely to be influenced by kidney disease status (assumed that attendance to healthcare facility for severe
- 20 infections was unlikely to be strongly influenced by awareness of CKD as a comorbidity but that attendance for less severe infections may be influenced by
- 21 this in the absence of active surveillance).
- 22 12. Low risk: At least age, sex and diabetes must have been eligible and considered for the final model.
- 23 13. Controls matched to cases on age at index data (within 1 year), sex, general practice, and calendar time. Estimate adjusted for smoking status,
- 24 Townsend deprivation score, use of influenza vaccine in previous 12 months, use of pneumococcal vaccine in previous 5 years, number of years of medical
- 25 records data available in database, and comorbidities including: diabetes, chronic heart disease, chronic respiratory disease, asplenia, cerebrospinal shunt,
- 26 chronic liver disease, sickle cell disease or coeliac disease, cochlear implant, HIV/AIDS, immunosuppression, stroke or transient ischaemic attack,
- 27 rheumatoid arthritis, Parkinson's disease, multiple sclerosis, dementia, osteoporosis, and any cancer.
- 28 14. Controls matched for age and sex. Diabetes eligible for inclusion in final model, which was adjusted for age, pneumococcal vaccine, congestive heart
- 29 failure, alcohol use, BMI and unemployment.
- 30 15. Age, sex and diabetes eligible for inclusion in final model. Final model adjusted for age, non-English language at home, living in a detached house, living
- 31 alone, congestive heart failure, chronic obstructive pulmonary disease, dysphagia, Barthel index of functional status, immunosuppressive medications,
- 32 nutritional score, tobacco use, alcohol use, and exposure to fumes.
- 33
- 34
- 35
- 36
- 37
- 38
- 39
- 40
- 41
- 42
- 43
- 44
- 45
- 46
- 47

1  
2  
3 16. The best adjusted estimate for urinary sepsis is adjusted for asymptomatic bacteriuria and age, and restricted to diabetics, but not adjusted for sex.

4 17. High risk: age-restricted and stratified by long term care facility (LCTF) residency, but no management of confounding by sex or co-morbidities.

5 18. High risk: exposure defined after the infection defined as the study outcome.

6 19. Rate ratios for hospitalisation with UTI, pneumonia and bacteraemia/ sepsis unadjusted. Rate ratios for hospitalisation with any infection calculated as  
7 the ratio of the rate among participants with CKD, compared with no CKD, each rate having been adjusted for gender, prior hospitalisation, ASHD, CHF, CVA,  
8 PVD, dysrhythmia, other cardiac disease, diabetes, COPD, hypertension, liver disease, gastrointestinal disease, cancer, and anemia.  
9  
10  
11  
12  
13  
14  
15  
16  
17  
18  
19  
20  
21  
22  
23  
24  
25  
26  
27  
28  
29  
30  
31  
32  
33  
34  
35  
36  
37  
38  
39  
40  
41  
42  
43  
44  
45  
46  
47

1  
2  
3  
4  
5  
6  
7  
8  
9  
10  
11  
12  
13  
14  
15  
16  
17  
18  
19  
20  
21  
22  
23  
24  
25  
26  
27  
28  
29  
30  
31  
32  
33  
34  
35  
36  
37  
38  
39  
40  
41  
42  
43  
44  
45  
46  
47  
48  
49  
50  
51  
52  
53  
54  
55  
56  
57  
58  
59  
60

For peer review only

1  
2  
3  
4  
5  
6  
7  
8  
9  
10  
11  
12  
13  
14  
15  
16  
17  
18  
19  
20  
21  
22  
23  
24  
25  
26  
27  
28  
29  
30  
31  
32  
33  
34  
35  
36  
37  
38  
39  
40  
41  
42  
43  
44  
45  
46  
47  
48  
49  
50  
51  
52  
53  
54  
55  
56  
57  
58  
59  
60

**Supplementary Figure 1:** Funnel plot showing the relationship between relative risk and standard error for the 17 estimates from all 12 studies considered for meta-analysis (all infections combined)

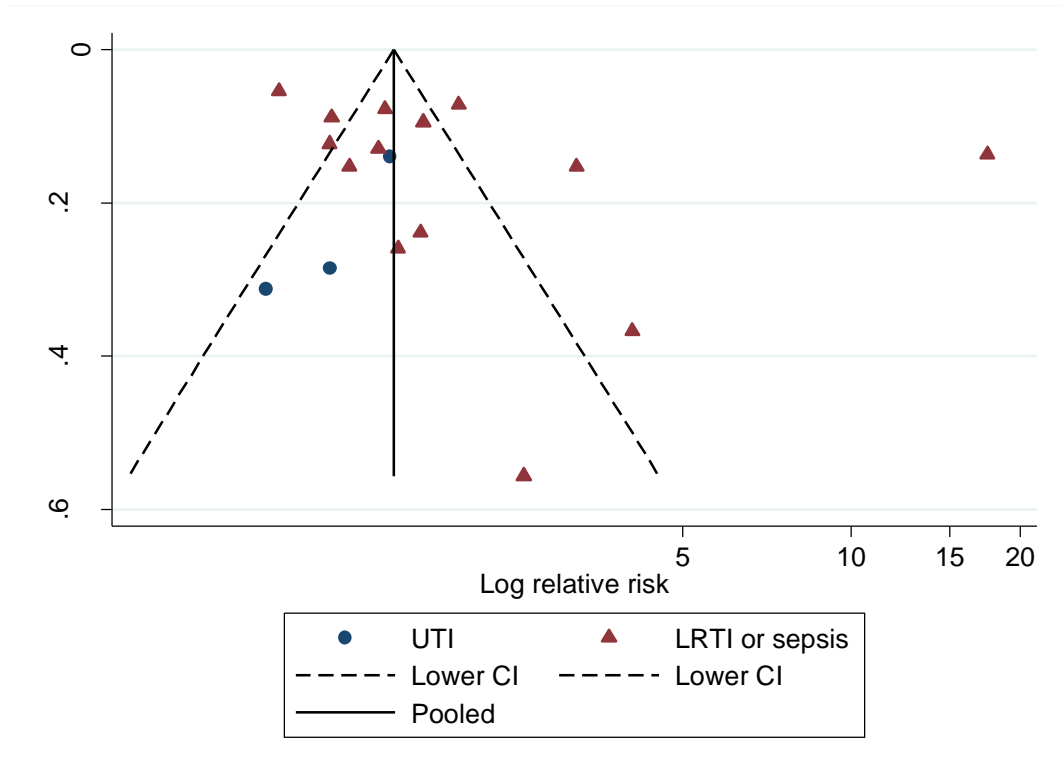

UTI = urinary tract infection

Other infections comprised lower respiratory tract infections and sepsis.

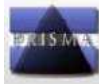

# PRISMA 2009 Checklist

| Section/topic                      | #  | Checklist item                                                                                                                                                                                                                                                                                              | Reported on page #     |
|------------------------------------|----|-------------------------------------------------------------------------------------------------------------------------------------------------------------------------------------------------------------------------------------------------------------------------------------------------------------|------------------------|
| <b>TITLE</b>                       |    |                                                                                                                                                                                                                                                                                                             |                        |
| Title                              | 1  | Identify the report as a systematic review, meta-analysis, or both.                                                                                                                                                                                                                                         | 1                      |
| <b>ABSTRACT</b>                    |    |                                                                                                                                                                                                                                                                                                             |                        |
| Structured summary                 | 2  | Provide a structured summary including, as applicable: background; objectives; data sources; study eligibility criteria, participants, and interventions; study appraisal and synthesis methods; results; limitations; conclusions and implications of key findings; systematic review registration number. | 2                      |
| <b>INTRODUCTION</b>                |    |                                                                                                                                                                                                                                                                                                             |                        |
| Rationale                          | 3  | Describe the rationale for the review in the context of what is already known.                                                                                                                                                                                                                              | 6                      |
| Objectives                         | 4  | Provide an explicit statement of questions being addressed with reference to participants, interventions, comparisons, outcomes, and study design (PICOS).                                                                                                                                                  | 7                      |
| <b>METHODS</b>                     |    |                                                                                                                                                                                                                                                                                                             |                        |
| Protocol and registration          | 5  | Indicate if a review protocol exists, if and where it can be accessed (e.g., Web address), and, if available, provide registration information including registration number.                                                                                                                               | 8                      |
| Eligibility criteria               | 6  | Specify study characteristics (e.g., PICOS, length of follow-up) and report characteristics (e.g., years considered, language, publication status) used as criteria for eligibility, giving rationale.                                                                                                      | 8 and Appendix Table 4 |
| Information sources                | 7  | Describe all information sources (e.g., databases with dates of coverage, contact with study authors to identify additional studies) in the search and date last searched.                                                                                                                                  | 8                      |
| Search                             | 8  | Present full electronic search strategy for at least one database, including any limits used, such that it could be repeated.                                                                                                                                                                               | Appendix Tables 1-3    |
| Study selection                    | 9  | State the process for selecting studies (i.e., screening, eligibility, included in systematic review, and, if applicable, included in the meta-analysis).                                                                                                                                                   | 8                      |
| Data collection process            | 10 | Describe method of data extraction from reports (e.g., piloted forms, independently, in duplicate) and any processes for obtaining and confirming data from investigators.                                                                                                                                  | 7                      |
| Data items                         | 11 | List and define all variables for which data were sought (e.g., PICOS, funding sources) and any assumptions and simplifications made.                                                                                                                                                                       | 7                      |
| Risk of bias in individual studies | 12 | Describe methods used for assessing risk of bias of individual studies (including specification of whether this was done at the study or outcome level), and how this information is to be used in any data synthesis.                                                                                      | 9                      |
| Summary measures                   | 13 | State the principal summary measures (e.g., risk ratio, difference in means).                                                                                                                                                                                                                               | 9                      |



# PRISMA 2009 Checklist

|                      |    |                                                                                                                                                           |    |
|----------------------|----|-----------------------------------------------------------------------------------------------------------------------------------------------------------|----|
| Synthesis of results | 14 | Describe the methods of handling data and combining results of studies, if done, including measures of consistency (e.g., $I^2$ ) for each meta-analysis. | 10 |
|----------------------|----|-----------------------------------------------------------------------------------------------------------------------------------------------------------|----|

Page 1 of 2

| Section/topic                 | #  | Checklist item                                                                                                                                                                                           | Reported on page #       |
|-------------------------------|----|----------------------------------------------------------------------------------------------------------------------------------------------------------------------------------------------------------|--------------------------|
| Risk of bias across studies   | 15 | Specify any assessment of risk of bias that may affect the cumulative evidence (e.g., publication bias, selective reporting within studies).                                                             | 10                       |
| Additional analyses           | 16 | Describe methods of additional analyses (e.g., sensitivity or subgroup analyses, meta-regression), if done, indicating which were pre-specified.                                                         | 10                       |
| <b>RESULTS</b>                |    |                                                                                                                                                                                                          |                          |
| Study selection               | 17 | Give numbers of studies screened, assessed for eligibility, and included in the review, with reasons for exclusions at each stage, ideally with a flow diagram.                                          | 12 and figure 1          |
| Study characteristics         | 18 | For each study, present characteristics for which data were extracted (e.g., study size, PICOS, follow-up period) and provide the citations.                                                             | 12 and Table 1           |
| Risk of bias within studies   | 19 | Present data on risk of bias of each study and, if available, any outcome level assessment (see item 12).                                                                                                | 14 and Table 2           |
| Results of individual studies | 20 | For all outcomes considered (benefits or harms), present, for each study: (a) simple summary data for each intervention group (b) effect estimates and confidence intervals, ideally with a forest plot. | 13 and Figure 2          |
| Synthesis of results          | 21 | Present results of each meta-analysis done, including confidence intervals and measures of consistency.                                                                                                  | 13 and Figure 2          |
| Risk of bias across studies   | 22 | Present results of any assessment of risk of bias across studies (see Item 15).                                                                                                                          | 14 and Appendix Figure 1 |
| Additional analysis           | 23 | Give results of additional analyses, if done (e.g., sensitivity or subgroup analyses, meta-regression [see Item 16]).                                                                                    | 13                       |
| <b>DISCUSSION</b>             |    |                                                                                                                                                                                                          |                          |
| Summary of evidence           | 24 | Summarize the main findings including the strength of evidence for each main outcome; consider their relevance to key groups (e.g., healthcare providers, users, and policy makers).                     | 22                       |
| Limitations                   | 25 | Discuss limitations at study and outcome level (e.g., risk of bias), and at review-level (e.g., incomplete retrieval of identified research, reporting bias).                                            | 22,24                    |
| Conclusions                   | 26 | Provide a general interpretation of the results in the context of other evidence, and implications for future research.                                                                                  | 25-26                    |
| <b>FUNDING</b>                |    |                                                                                                                                                                                                          |                          |

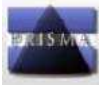

# PRISMA 2009 Checklist

1  
2  
3  
4  
5  
6  
7  
8  
9  
10  
11  
12  
13  
14  
15  
16  
17  
18  
19  
20  
21  
22  
23  
24  
25  
26  
27  
28  
29  
30  
31  
32  
33  
34  
35  
36  
37  
38  
39  
40  
41  
42  
43  
44  
45  
46  
47  
48  
49

|         |    |                                                                                                                                            |    |
|---------|----|--------------------------------------------------------------------------------------------------------------------------------------------|----|
| Funding | 27 | Describe sources of funding for the systematic review and other support (e.g., supply of data); role of funders for the systematic review. | 31 |
|---------|----|--------------------------------------------------------------------------------------------------------------------------------------------|----|

From: Moher D, Liberati A, Tetzlaff J, Altman DG, The PRISMA Group (2009). Preferred Reporting Items for Systematic Reviews and Meta-Analyses: The PRISMA Statement. PLoS Med 6(6): e1000097. doi:10.1371/journal.pmed1000097

For more information, visit: [www.prisma-statement.org](http://www.prisma-statement.org).

Page 2 of 2

For peer review only

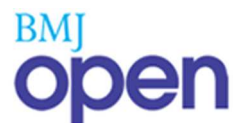

**Chronic kidney disease as a risk factor for acute community-acquired infections in high income countries: a systematic review**

|                                 |                                                                                                                                                                                                |
|---------------------------------|------------------------------------------------------------------------------------------------------------------------------------------------------------------------------------------------|
| Journal:                        | <i>BMJ Open</i>                                                                                                                                                                                |
| Manuscript ID:                  | bmjopen-2013-004100.R2                                                                                                                                                                         |
| Article Type:                   | Research                                                                                                                                                                                       |
| Date Submitted by the Author:   | 20-Feb-2014                                                                                                                                                                                    |
| Complete List of Authors:       | McDonald, Helen; London School of Hygiene & Tropical Medicine, Non-Communicable Disease Epidemiology<br>Thomas, Sara; London School of Hygiene & Tropical Medicine,<br>Nitsch, Dorothea; LSHTM |
| <b>Primary Subject Heading</b>: | Epidemiology                                                                                                                                                                                   |
| Secondary Subject Heading:      | Public health, Infectious diseases, General practice / Family practice, Renal medicine                                                                                                         |
| Keywords:                       | Epidemiology < INFECTIOUS DISEASES, Nephrology < INTERNAL MEDICINE, Chronic renal failure < NEPHROLOGY, PRIMARY CARE                                                                           |
|                                 |                                                                                                                                                                                                |

SCHOLARONE™  
Manuscripts



1  
2  
3 **Title: Chronic kidney disease as a risk factor for acute community-acquired infections**  
4  
5 **in high-income countries: a systematic review**  
6  
7

8 **Authors:** Helen I McDonald,<sup>1</sup> Sara L Thomas,<sup>2</sup> Dorothea Nitsch.<sup>1</sup>  
9

10  
11 1. Department of Non-communicable Disease Epidemiology, London School of Hygiene &  
12 Tropical Medicine, Keppel Street, London, UK.  
13

14  
15 2. Department of Infectious Disease Epidemiology, London School of Hygiene & Tropical  
16 Medicine, Keppel Street, London, UK.  
17  
18  
19

20  
21  
22 **Corresponding author:**  
23

24  
25 Helen I McDonald  
26

27  
28 Faculty of Epidemiology and Population Health, London School of Hygiene & Tropical  
29 Medicine, Keppel Street, London, UK WC1E 7HT. Tel: +44 (0)20 7636 8636 ext 2247. Fax:  
30  
31 N/A. E-mail: [helen.mcdonald@lshtm.ac.uk](mailto:helen.mcdonald@lshtm.ac.uk)  
32  
33  
34

35  
36 **Keywords:** Community-acquired infections, Chronic Renal Insufficiency, Systematic review,  
37 Risk factors.  
38  
39

40  
41  
42 **Word counts:**  
43

44  
45 Abstract: 246 words  
46

47  
48 Body: 3,206 words  
49  
50  
51  
52  
53  
54  
55  
56  
57  
58  
59  
60

**ABSTRACT:**

**Objectives:** A systematic review of the association of pre-dialysis chronic kidney disease (CKD) with the incidence of acute, community-acquired infections.

**Design:** We searched Medline, Embase and Cochrane databases (inception to 16/01/2014) for studies analysing the association of pre-dialysis kidney disease with the incidence of acute, community-acquired urinary tract infection (UTI), lower respiratory tract or central nervous system infections, or sepsis. Studies were required to include at least 30 participants with and without kidney disease.

**Setting & participants:** Community-based populations of adults in high income countries.

**Outcome measures:** Acute, community-acquired urinary tract infection (UTI), lower respiratory tract or central nervous system infections, or sepsis.

**Results:** We identified 14 eligible studies. Estimates from two studies lacked 95% confidence intervals and standard errors. The remaining 12 studies yielded 17 independent effect estimates. Only three studies included infections managed in the community. Quality assessment revealed that probable misclassification of kidney disease status and poor adjustment for confounding were common. There was evidence from a few large high quality studies of a graded association between pre-dialysis CKD stage and hospitalisation for infection. One study found an interaction with age, with a declining effect of CKD on infection risk as age increased. There was evidence of between-studies heterogeneity ( $I^2=96.5\%$ ,  $p<0.001$ ) which persisted in subgroup analysis, and thus meta-analysis was not performed.

1  
2  
3  
4  
5  
6  
7  
8  
9  
10  
11  
12  
13  
14  
15  
16  
17  
18  
19  
20  
21  
22  
23  
24  
25  
26  
27  
28  
29  
30  
31  
32  
33  
34  
35  
36  
37  
38  
39  
40  
41  
42  
43  
44  
45  
46  
47  
48  
49  
50  
51  
52  
53  
54  
55  
56  
57  
58  
59  
60

**Conclusions:** Pre-dialysis kidney disease appears to be associated with increased risk of severe infection. Whether pre-dialysis kidney disease increases the susceptibility to infections and whether age modifies this association remains unclear.

For peer review only

## ARTICLE SUMMARY

### Article focus:

- This review sought to assess systematically whether pre-dialysis chronic kidney disease (CKD) is a risk factor for the incidence of acute, community-acquired urinary tract infection (UTI), lower respiratory tract infection (LRTI) central nervous system (CNS) infection, or sepsis, among community-based adults in high income countries.
- Any increased risk of infection incidence at early stages of CKD would affect a large and growing number of patients. Awareness and quantification of this risk could have benefits for patient management, more effective vaccination strategies and healthcare planning.

### Key messages:

- We identified major gaps in the literature including: a scarcity of high-quality studies on this research topic; a lack of studies using less severe outcome measures than hospitalisation, to allow any association of CKD with susceptibility to infection to be distinguished from an association with severity of infection; and a lack of data on the relationship between proteinuria and infection incidence independently of glomerular filtration rate.
- All studies were consistent with a positive association between CKD and infection risk.

### Strengths and limitations of this study:

- This study used a sensitive search strategy, with a broad definition of kidney disease, for a thorough and inclusive search.

1  
2  
3  
4  
5  
6  
7  
8  
9  
10  
11  
12  
13  
14  
15  
16  
17  
18  
19  
20  
21  
22  
23  
24  
25  
26  
27  
28  
29  
30  
31  
32  
33  
34  
35  
36  
37  
38  
39  
40  
41  
42  
43  
44  
45  
46  
47  
48  
49  
50  
51  
52  
53  
54  
55  
56  
57  
58  
59  
60

- Between-study heterogeneity, and the low quality of many of the studies, limit interpretation of results of the studies currently available.

For peer review only

## INTRODUCTION

Chronic kidney disease (CKD) is common, and its prevalence is increasing.[1] Infection is a major cause of mortality in end-stage renal disease (ESRD) and hospitalisation at all stages of CKD. The second commonest cause of death among ESRD patients in the US is septicaemia, and patients with ESRD are at increased risk of death from infection compared to the general population.[2-4] Both ESRD and pre-dialysis patients with CKD in the US are at higher risk of hospitalisation for infection than the general population.[2, 5-6] Pre-dialysis CKD has been found to increase mortality among patients hospitalised with infections.[7]

Increased mortality and hospitalisation from infection could be driven by increased severity of infection, i.e. once an infection is present, the course of the associated illness is more severe, or increased incidence, i.e. CKD may make people more susceptible to develop an infection. Patients with CKD display impaired host immunity: reduced vaccination responsiveness is observed at all stages of CKD.[8]

Among ESRD patients, aspects of dialysis, such as vascular and peritoneal access for dialysis, may be a risk factor for infection incidence and severity. However, this does not tell the whole story, and only 23% of infection-related hospitalisations among haemodialysis patients in the US were identified as related to vascular access in the HEMO study.[9] Risk factors for infection identified among ESRD patients which are not related to renal replacement therapy, and could apply at all stages of pre-dialysis CKD, include: the causes and treatment of kidney disease; co-morbidities; reduced vaccine effectiveness; and high levels of exposure to health care facilities.[10]

If there is an increased risk of infection incidence at early stages of CKD, this would affect a large and growing number of patients. Awareness and quantification of this risk could have

1  
2  
3 benefits for patient management, more effective vaccination strategies and healthcare  
4  
5 planning.  
6  
7

8 Narrative reviews have concluded that it is likely that CKD in itself increases infection  
9  
10 incidence, but reported a lack of evidence.[10-12] We are not aware of any relevant  
11  
12 systematic literature reviews of the effect of CKD on infection incidence.  
13  
14

15  
16 This review sought to assess systematically whether pre-dialysis CKD is a risk factor for the  
17  
18 incidence of acute, community-acquired urinary tract infection (UTI), lower respiratory tract  
19  
20 infection (LRTI) central nervous system (CNS) infection, or sepsis, among community-based  
21  
22 adults in high income countries.  
23  
24  
25  
26  
27  
28  
29  
30  
31  
32  
33  
34  
35  
36  
37  
38  
39  
40  
41  
42  
43  
44  
45  
46  
47  
48  
49  
50  
51  
52  
53  
54  
55  
56  
57  
58  
59  
60

## METHODS

### Data Sources and Searches

One reviewer (HM) searched the Medline and Embase databases, and the Cochrane library, from inception to 16 January 2014. The search strategies combined text words and MeSH terms for three concepts: acute community-acquired infection (either sepsis, UTI, LRTI or CNS infection); kidney disease; and relative risk. We used search terms to identify studies among adult humans in high-income countries (according to the World Bank classification),[13] and limited the search to articles in English, French or German. The full strategies are available in **Supplementary Tables 1-3**.

We searched the reference lists of all included studies and any pertinent review articles to identify further eligible studies.

### Study Selection

One reviewer (HM) screened titles and abstracts, reviewed the full-text of identified studies and made initial decisions on eligibility according to pre-specified inclusion criteria (**Supplementary Table 4**). Any borderline cases were discussed between HM, DN and ST. A second reviewer (DN) checked a sample of 100 abstracts, selected randomly after de-duplication of records, and a kappa statistic was calculated to describe agreement in selection of studies.

Eligible studies analysed the effect of pre-dialysis kidney disease on the relative risk of at least one of the four specified acute, community-acquired infections among community-based adults in high-income countries. We excluded study populations managed in secondary



1  
2  
3 care (unless for kidney disease), routinely treated with immunosuppressants, or exclusively of  
4  
5 pregnant women, as these groups have a raised risk of infection, and the relationship of CKD  
6  
7 to infection risk may be different among these groups compared to that in the general adult  
8  
9 population in primary care. Ascertainment of CKD, as a silent disease, and, to a certain  
10  
11 extent, ascertainment of acute community-acquired infections, are dependent on high levels  
12  
13 of monitoring and good access to healthcare, so we restricted our search to high-income  
14  
15 countries. Chronic infections such as tuberculosis were not included, as the relationship  
16  
17 between CKD and chronic infection is very likely to differ from that between CKD and acute  
18  
19 infections, which was our focus in this review.  
20  
21

22  
23  
24 To maximise the sensitivity of our search strategy, we accepted a wide range of definitions of  
25  
26 kidney disease, including: medical diagnosis of kidney disease, reduced estimated  
27  
28 glomerular filtration rate or creatinine clearance, elevated creatinine, proteinuria, micro- or  
29  
30 macro-albuminuria, and renal structural abnormalities. We also accepted definitions which  
31  
32 included some patients with ESRD among the patients with CKD, but excluded definitions  
33  
34 which were exclusively patients receiving renal replacement therapy.  
35  
36

37  
38 Outcomes of interest were relative risk estimates of acute community-acquired LRTIs, UTIs,  
39  
40 CNS infections or sepsis. We accepted outcomes describing incidence of severe infections  
41  
42 (such as hospitalisation with pneumonia).  
43  
44

45  
46 We restricted our search to published studies which were sufficiently large to include at least  
47  
48 30 participants with and without kidney disease, to allow reasonable precision of the study  
49  
50 estimate. Detailed eligibility criteria are listed in **Supplementary Table 4**.  
51  
52

### 53 **Data Extraction and Quality Assessment**

54  
55  
56  
57  
58  
59  
60

1  
2  
3 Data were extracted from relevant studies using a pre-specified collection form. Study  
4  
5 characteristics extracted included study design, data source, any participant exclusion criteria,  
6  
7 number of participants, age, gender, baseline renal function, definition of renal impairment,  
8  
9 definition of the outcome infection. An estimate of relative risk (rate ratio, risk ratio or odds  
10  
11 ratio) with any measures taken to address confounding was extracted from each eligible  
12  
13 independent analysis in each study. Studies with no confidence intervals and for which the  
14  
15 standard error was not calculable from the data presented were included in the review but not  
16  
17 considered for meta-analysis.  
18  
19

20  
21  
22 When multiple estimates were available from a study but were not independent, a single  
23  
24 estimate was identified for potential meta-analysis by selecting the estimate best adjusted for  
25  
26 confounding, using the most recent data, comparing the level of CKD most common in the  
27  
28 general population with no CKD.  
29

30  
31  
32 Study quality was assessed using a pre-specified tool adapted from Higgins *et al.* for  
33  
34 observational studies.[14] Studies were assigned a high, low or uncertain risk of each of:  
35  
36 selection bias, non-differential measurement error for exposure and outcome, information  
37  
38 bias in exposure and outcome, confounding and reverse causation. The minimum requirement  
39  
40 for a low risk of bias from confounding was appropriate management of confounding by age,  
41  
42 sex and diabetes. Specific criteria used are detailed in **Supplementary Table 5**.  
43  
44

#### 45 46 **Data Synthesis and Analysis**

47  
48  
49 The relationship between CKD and UTIs was considered likely to differ from that of CKD to  
50  
51 other infections, due to potential reverse causality. For example, repeat UTIs may cause  
52  
53 kidney disease, or structural kidney disease may be identified though investigation of repeat  
54  
55 UTIs. Therefore in all quantitative analysis, UTIs were analysed separately from other  
56  
57 infections.  
58  
59

1  
2  
3 Estimates were examined for heterogeneity using Cochran's Q statistic and the  $I^2$  statistic as  
4 described by Higgins *et al.*[15] If  $I^2$  was less than 50% and Cochran's Q statistic  $p \geq 0.1$ ,  
5  
6  
7 fixed-effects meta-analysis was considered for each of the two categories (UTI, and other  
8  
9  
10 infections). Funnel plots were constructed to look for publication bias. All analysis was  
11  
12 conducted using STATA version 12.0.  
13  
14  
15  
16  
17  
18  
19  
20  
21  
22  
23  
24  
25  
26  
27  
28  
29  
30  
31  
32  
33  
34  
35  
36  
37  
38  
39  
40  
41  
42  
43  
44  
45  
46  
47  
48  
49  
50  
51  
52  
53  
54  
55  
56  
57  
58  
59  
60

For peer review only

## RESULTS

The database searches identified 10,380 citations, of which 1,204 were duplicates (**Figure 1**).

Both reviewers had 100% agreement on which studies to extract for full-text analysis from screening a random sample of 100 abstracts (Cohen's  $K=1$ ).

We identified 14 eligible studies, with varying study characteristics (**Table 1**). Four studies were case-control studies,[16-19] and ten were cohort studies.[20-29] Seven studies investigated a range of risk factors for infection,[16-19, 21, 28-29] two studies reported the effect of CKD on infection as a confounder of the effect of interest,[24-25] and five studies investigated the effect of CKD on infection risk as their primary research question.[5, 20, 22, 26-27]

Seven studies were based among the general population.[5, 16, 19, 21, 23, 28-29] Other study populations included: attendants at a specialist renal clinic,[22] patients with diabetes mellitus,[25] patients admitted to hospital for an acute cardiovascular event or an arterial revascularisation procedure, [24] and the Navajo Nation – a population which experiences 3–5 times higher rates of invasive pneumococcal disease than the general US population.[17] The population of the cohort studies in Calgary, Canada were adults with a serum creatinine test result available in their medical records.[26-27] There is some overlap in the study populations of these two cohort studies: residents aged over 65 years with a serum creatinine measurement between 1 July 2001 and 31 December 2001 and also between 1 July 2003 and 30 June 2004 would have been included in both studies for the period from the second creatinine measurement until 31 December 2004.[26-27]

Definitions of kidney disease included medical diagnoses of chronic renal disease, elevated creatinine levels, impaired creatinine clearance, and structural abnormalities of the kidney.

Five studies excluded patients with ESRD, and one specified the number included, but for the

1  
2  
3 remaining eight studies it was unclear how many of the included patients received renal  
4  
5 replacement therapy (**Table 1**).

6  
7  
8 Three studies recorded infections diagnosed in primary care or outpatients,[16, 19, 29] two  
9  
10 recorded infections identified from a positive culture result,[17, 26] one included infections  
11  
12 diagnosed in the emergency department,[18] seven required hospital admission for  
13  
14 infection,[5, 21, 23-25, 27-28] and for one study the definition and severity of infection was  
15  
16 unclear.[22]

17  
18  
19 For two studies, the results extracted had no confidence interval or standard error and these  
20  
21 could not be calculated from the reported data. From the remaining 12 studies, 17  
22  
23 independent effect estimates with standard errors were available for meta-analysis, among  
24  
25 which UTI was the outcome in three estimates.

26  
27  
28 For all infections there was strong evidence of considerable heterogeneity (Cochran's Q  
29  
30 statistic  $p < 0.001$ ,  $I^2 = 96.5\%$ ). This persisted when estimates for UTIs were excluded  
31  
32 ( $p < 0.001$ ,  $I^2 = 97.2\%$ ), when considering LRTIs alone ( $p < 0.001$ ,  $I^2 = 98.2\%$ ), when limited to  
33  
34 cohort studies ( $p < 0.001$ ,  $I^2 = 97.3\%$ ), and when stratified by exclusion of patients with ESRD  
35  
36 (ESRD excluded,  $p < 0.001$ ,  $I^2 = 88.9\%$ ; ESRD not excluded  $p < 0.001$ ,  $I^2 = 97.2\%$ ). Due to this  
37  
38 heterogeneity, meta-analysis was not performed.

39  
40  
41 All results are displayed in the Forest plot (**Figure 2**). Despite the quantitative heterogeneity,  
42  
43 the results were qualitatively similar: all estimates were compatible with a positive  
44  
45 association between kidney disease and infection. The four studies which compared different  
46  
47 stages of CKD found a graded association of increased risk of infection with more severe  
48  
49 CKD. These studies all excluded patients with end-stage renal disease.[22-23, 26-27] One  
50  
51 study found that the effect of CKD on infection risk was modified by age, with a declining  
52  
53 effect of CKD on infection risk as age increased.[27] This effect was consistent with the  
54  
55  
56  
57  
58  
59  
60

1  
2  
3 lower effect of CKD on UTI incidence found among 86–90 year olds (0.90, 95% CI 0.50–  
4  
5 1.77) compared with an adult study population with a mean age of 66 years (1.50, 95% CI  
6  
7 1.10–1.90).[25, 29]  
8  
9

10 The funnel plot was sparsely populated, with widely scattered effect estimates, and provides  
11  
12 no clear evidence for or against publication bias (**Supplementary Figure 1**).  
13  
14

15  
16 Study quality was variable. Relying on routine medical diagnosis introduced a potential  
17  
18 source of misclassification of kidney disease status for seven studies.[5, 16-19, 21, 24] There  
19  
20 was variable adjustment for confounding, from unadjusted crude estimates to estimates  
21  
22 adjusted for a range of comorbidities, demographic and socio-economic factors. Six studies  
23  
24 did not meet this review's minimal requirements.[19, 21-22, 25, 28-29] The summarised  
25  
26 results are displayed in **Table 2**, and the full quality assessment is in **Supplementary Table**  
27  
28  
29 **5**.  
30  
31  
32  
33  
34  
35  
36  
37  
38  
39  
40  
41  
42  
43  
44  
45  
46  
47  
48  
49  
50  
51  
52  
53  
54  
55  
56  
57  
58  
59  
60

Table 1: Characteristics of eligible studies (n=14)

| Case-control studies             |             |                                 |                                                                                                                       |                       |                                    |                                                                      |                               |                                                                                                                                   |                                                    |                           |                   |                                          |
|----------------------------------|-------------|---------------------------------|-----------------------------------------------------------------------------------------------------------------------|-----------------------|------------------------------------|----------------------------------------------------------------------|-------------------------------|-----------------------------------------------------------------------------------------------------------------------------------|----------------------------------------------------|---------------------------|-------------------|------------------------------------------|
|                                  | Study       |                                 |                                                                                                                       | Kidney disease        |                                    |                                                                      | Infection                     |                                                                                                                                   |                                                    | Kidney disease prevalence |                   | Odds ratio (95% CI)                      |
|                                  | Date        | Setting                         | Population<br>Age<br>% Female                                                                                         | Defined               | ESRD included                      | Ascertained                                                          | Type                          | Defined                                                                                                                           | Ascertained                                        | Cases                     | Controls          |                                          |
| Vinogradova 2009 <sup>[16]</sup> | 1996 - 2005 | UK                              | General population<br><br>Any age<br>Median age band 45-64 years<br><br>Cases 49.3%, controls 49.1%                   | Chronic renal disease | Unclear                            | Primary care medical record diagnosis code in previous 5 years       | Pneumonia                     | Medical diagnosis recorded in primary care records                                                                                | READ code in primary care medical records          | 203/17,172 (1.2%)         | 386/71,299 (0.5%) | 1.72 (1.3 – 2.07) <sup>1</sup>           |
| Watt 2007 <sup>[17]</sup>        | 1999 - 2002 | The Navajo Nation<br><br>USA    | Navajo adults<br><br>≥18 years<br><br>Summary age and sex n/r                                                         | Chronic renal failure | 17 participants receiving dialysis | Medical record abstraction                                           | Invasive pneumococcal disease | S.pneumoniae isolated from a normally sterile body fluid during illness                                                           | Active laboratory surveillance system <sup>2</sup> | 20/118 (16.9%)            | 12/353 (3.4%)     | 2.6 (0.87 – 7.7) <sup>3</sup><br>P=0.087 |
| Loeb 2009 <sup>[18]</sup>        | 2002 - 2005 | Ontario & Alberta<br><br>Canada | General population<br><br>≥ 65 years<br>Mean age: cases 79.1, controls 74.4 years.<br><br>Cases 39.6%, controls 68.5% | Renal disease         | Unclear                            | Cases: hospital interview.<br>Controls: telephone interview at home. | Pneumonia                     | Consistent chest X-ray and ≥2 of: chest pain, shortness of breath, productive cough, temperature >38°C, crackles on auscultation. | Recruited patients attending emergency departments | 127/690 (18.4%)           | 38/82 (4.4%)      | 4.06 (1.98–8.35) <sup>4</sup><br>P<0.001 |
| Schnoor                          | 2002        | Germany                         | General                                                                                                               | Chronic               | Unclear                            | Cases:                                                               | Pneumonia                     | (1) Infiltrate on chest                                                                                                           | Community-                                         | 49/1128                   | 27/1044           | 1.7 (1.1–2.8)                            |

|                      |           |  |                                                                                                                       |               |  |                                                                          |  |                                                                                                                                                                                         |                                                                                         |        |        |                        |
|----------------------|-----------|--|-----------------------------------------------------------------------------------------------------------------------|---------------|--|--------------------------------------------------------------------------|--|-----------------------------------------------------------------------------------------------------------------------------------------------------------------------------------------|-----------------------------------------------------------------------------------------|--------|--------|------------------------|
| 2007 <sup>[19]</sup> | –<br>2005 |  | population<br><br>>18 years<br>Mean age:<br>cases 57,<br>controls 57.5<br>years<br><br>Cases 44.8%,<br>controls 54.7% | renal disease |  | reporting<br>physician.<br>Controls: self-<br>reported<br>questionnaire. |  | X-ray or (2)<br>temperature ≥38.3°C<br>with any of: cough,<br>purulent sputum,<br>positive auscultation.<br>Excluded if<br>hospitalised within<br>prior 4 weeks, or<br>immunodeficient. | acquired<br>pneumonia<br>network<br>registry reports<br>(primary and<br>secondary care) | (4.3%) | (2.6%) | (unadjusted)<br>P<0.05 |
|----------------------|-----------|--|-----------------------------------------------------------------------------------------------------------------------|---------------|--|--------------------------------------------------------------------------|--|-----------------------------------------------------------------------------------------------------------------------------------------------------------------------------------------|-----------------------------------------------------------------------------------------|--------|--------|------------------------|

**Cohort studies**

|                                | Study       |                                      |                                                                                                                                   | Kidney disease                                               |          |                     | Comparison group                               | Infection                      |                                                                                                    |                                                                                      | Risk or rate ratio (95% CI)    |                               |
|--------------------------------|-------------|--------------------------------------|-----------------------------------------------------------------------------------------------------------------------------------|--------------------------------------------------------------|----------|---------------------|------------------------------------------------|--------------------------------|----------------------------------------------------------------------------------------------------|--------------------------------------------------------------------------------------|--------------------------------|-------------------------------|
|                                | Date        | Setting<br><br>Follow up time        | Population Number<br>Age<br>Sex                                                                                                   | Defined Number with kidney disease                           | ESRD     | Ascertained         | Defined                                        | Type                           | Defined                                                                                            | Ascertained                                                                          |                                |                               |
| Higgins 1989 <sup>[22]</sup>   | 1985        | Oxford UK<br><br>1 year              | Patients attending a Renal Unit with chronic renal failure<br><br>n=211<br><br>17-77 years<br>Mean 50.5 years<br><br>% female n/r | Creatinine ≥250 µmol/l<br><br>Number n/r                     | Excluded | Serum creatinine    | Creatinine <250 µmol/l                         | UTI                            | >10 <sup>5</sup> organism/ml and ≥10 leucocytes /hpf in clean catch urine specimen                 | Medical record review                                                                | Creatinine µmol/l              |                               |
|                                |             |                                      |                                                                                                                                   |                                                              |          |                     |                                                |                                |                                                                                                    |                                                                                      | <250                           | 1                             |
|                                |             |                                      |                                                                                                                                   |                                                              |          |                     |                                                |                                |                                                                                                    |                                                                                      | 250-500                        | 1.5 <sup>5</sup>              |
|                                |             |                                      |                                                                                                                                   |                                                              |          |                     |                                                |                                |                                                                                                    |                                                                                      | >500                           | 2 <sup>5</sup>                |
| Dalrymple 2012 <sup>[23]</sup> | 1989 – 2007 | United States<br><br>Mean 11.5 years | General community-dwelling population <sup>6</sup><br><br>n=5,142<br><br>>65 years<br>Mean 72 years                               | Baseline eGFR<90 mL/min/1.73 m <sup>2,7</sup><br><br>n=3,863 | Excluded | Baseline cystatin C | Baseline eGFR ≥90 mL/min/1.73 m <sup>2,7</sup> | Pulmonary<br><br>Genitourinary | Hospital admission with a principal discharge diagnosis of the relevant infection (ICD-9-CM codes) | Medical record review following patient report of hospital admission in cohort study | eGFR mL/min/1.73m <sup>2</sup> |                               |
|                                |             |                                      |                                                                                                                                   |                                                              |          |                     |                                                |                                |                                                                                                    |                                                                                      | ≥90                            | 1                             |
|                                |             |                                      |                                                                                                                                   |                                                              |          |                     |                                                |                                |                                                                                                    |                                                                                      | 60–89                          | 1.22 (0.99–1.54) <sup>8</sup> |
|                                |             |                                      |                                                                                                                                   |                                                              |          |                     |                                                |                                |                                                                                                    |                                                                                      | 45–59                          | 1.27 (0.94–1.71) <sup>8</sup> |
|                                |             |                                      |                                                                                                                                   |                                                              |          |                     |                                                |                                |                                                                                                    |                                                                                      | 15–44                          | 1.81 (1.25–2.63) <sup>8</sup> |
|                                |             |                                      |                                                                                                                                   |                                                              |          |                     |                                                |                                |                                                                                                    |                                                                                      | ≥90                            | 1                             |
|                                |             |                                      |                                                                                                                                   |                                                              |          |                     |                                                |                                |                                                                                                    |                                                                                      | 60–89                          | 1.08 (0.75–1.56) <sup>8</sup> |
|                                |             |                                      |                                                                                                                                   |                                                              |          |                     |                                                |                                |                                                                                                    |                                                                                      | 45–59                          | 1.17 (0.67–2.05) <sup>8</sup> |
|                                |             |                                      |                                                                                                                                   |                                                              |          |                     |                                                |                                |                                                                                                    |                                                                                      | 15–44                          | 2.63 (1.40–4.96) <sup>8</sup> |



|                                                  |                               |                                          |                                                                                                |                                                                      |          |                                                                                |                                                            |                                       |                                                                                                                       |                                      |                                                                                                                                                                                                                                                                                                                                                                                                                                                                                                                                         |                                 |             |                                          |                                              |         |                                          |                                |                               |                                |                                                  |          |                                        |
|--------------------------------------------------|-------------------------------|------------------------------------------|------------------------------------------------------------------------------------------------|----------------------------------------------------------------------|----------|--------------------------------------------------------------------------------|------------------------------------------------------------|---------------------------------------|-----------------------------------------------------------------------------------------------------------------------|--------------------------------------|-----------------------------------------------------------------------------------------------------------------------------------------------------------------------------------------------------------------------------------------------------------------------------------------------------------------------------------------------------------------------------------------------------------------------------------------------------------------------------------------------------------------------------------------|---------------------------------|-------------|------------------------------------------|----------------------------------------------|---------|------------------------------------------|--------------------------------|-------------------------------|--------------------------------|--------------------------------------------------|----------|----------------------------------------|
|                                                  |                               |                                          | 61% female                                                                                     |                                                                      |          |                                                                                |                                                            | Bacteremia and sepsis                 |                                                                                                                       |                                      | <table border="1"> <tr> <td>≥90</td> <td>1</td> </tr> <tr> <td>60–89</td> <td>1.10 (0.77–1.58)<sup>8</sup></td> </tr> <tr> <td>45–59</td> <td>1.55 (0.93–2.57)<sup>8</sup></td> </tr> <tr> <td>15–44</td> <td>0.77 (0.29–2.03)<sup>8</sup></td> </tr> </table>                                                                                                                                                                                                                                                                          | ≥90                             | 1           | 60–89                                    | 1.10 (0.77–1.58) <sup>8</sup>                | 45–59   | 1.55 (0.93–2.57) <sup>8</sup>            | 15–44                          | 0.77 (0.29–2.03) <sup>8</sup> |                                |                                                  |          |                                        |
| ≥90                                              | 1                             |                                          |                                                                                                |                                                                      |          |                                                                                |                                                            |                                       |                                                                                                                       |                                      |                                                                                                                                                                                                                                                                                                                                                                                                                                                                                                                                         |                                 |             |                                          |                                              |         |                                          |                                |                               |                                |                                                  |          |                                        |
| 60–89                                            | 1.10 (0.77–1.58) <sup>8</sup> |                                          |                                                                                                |                                                                      |          |                                                                                |                                                            |                                       |                                                                                                                       |                                      |                                                                                                                                                                                                                                                                                                                                                                                                                                                                                                                                         |                                 |             |                                          |                                              |         |                                          |                                |                               |                                |                                                  |          |                                        |
| 45–59                                            | 1.55 (0.93–2.57) <sup>8</sup> |                                          |                                                                                                |                                                                      |          |                                                                                |                                                            |                                       |                                                                                                                       |                                      |                                                                                                                                                                                                                                                                                                                                                                                                                                                                                                                                         |                                 |             |                                          |                                              |         |                                          |                                |                               |                                |                                                  |          |                                        |
| 15–44                                            | 0.77 (0.29–2.03) <sup>8</sup> |                                          |                                                                                                |                                                                      |          |                                                                                |                                                            |                                       |                                                                                                                       |                                      |                                                                                                                                                                                                                                                                                                                                                                                                                                                                                                                                         |                                 |             |                                          |                                              |         |                                          |                                |                               |                                |                                                  |          |                                        |
| Hackam 2006 <sup>[24]</sup>                      | 1997 - 2002                   | Ontario Canada<br>Mean 2.2 years         | Patients with cardiovascular disease<br>n=69,168<br>>65 years<br>Mean 74.1 years<br>44% female | Chronic renal insufficiency<br>n=7,169                               | Unclear  | Health record databases <sup>9</sup>                                           | No chronic renal insufficiency                             | Sepsis                                | Hospital admission with a diagnosis of sepsis <sup>10</sup>                                                           | Health record database <sup>11</sup> | 1.47 (1.27–1.72) <sup>12</sup>                                                                                                                                                                                                                                                                                                                                                                                                                                                                                                          |                                 |             |                                          |                                              |         |                                          |                                |                               |                                |                                                  |          |                                        |
| Karunajeewa 2005 <sup>[25]</sup>                 | 1999 - 2000                   | Western Australia<br>Mean 2.9 years      | Patients with diabetes<br>n=496<br>>10 years<br>Mean 66.1 years <sup>13</sup><br>46.2% female  | Albuminuria; serum urea; serum creatinine                            | Unclear  | Baseline urinary albumin: creatinine ratio (ACR), serum urea, serum creatinine | Hazard ratio per 2.72-fold increase in ACR or serum urea   | Urinary sepsis and non-urinary sepsis | Hospitalisation diagnosis codes (principal diagnosis, or principal or secondary diagnosis) <sup>14</sup>              | Health record database <sup>15</sup> | <table border="1"> <tr> <td>Urinary sepsis (principal code)</td> <td>Ln(ACR)</td> <td>1.5 (1.1 – 1.9)<sup>16</sup><br/>p=0.004</td> </tr> <tr> <td>Urinary sepsis (principal or secondary code)</td> <td>Ln(ACR)</td> <td>1.3 (1.1 – 1.6)<sup>17</sup><br/>p=0.005</td> </tr> <tr> <td>Non-urinary sepsis (principal)</td> <td>Ln(ACR)</td> <td>1.4(1.1-1.9)<sup>16</sup></td> </tr> <tr> <td>Non-urinary sepsis (principal or secondary code)</td> <td>Ln(urea)</td> <td>4.6 (2.3-9.4)<sup>16</sup><br/>p&lt;0.001</td> </tr> </table> | Urinary sepsis (principal code) | Ln(ACR)     | 1.5 (1.1 – 1.9) <sup>16</sup><br>p=0.004 | Urinary sepsis (principal or secondary code) | Ln(ACR) | 1.3 (1.1 – 1.6) <sup>17</sup><br>p=0.005 | Non-urinary sepsis (principal) | Ln(ACR)                       | 1.4(1.1-1.9) <sup>16</sup>     | Non-urinary sepsis (principal or secondary code) | Ln(urea) | 4.6 (2.3-9.4) <sup>16</sup><br>p<0.001 |
| Urinary sepsis (principal code)                  | Ln(ACR)                       | 1.5 (1.1 – 1.9) <sup>16</sup><br>p=0.004 |                                                                                                |                                                                      |          |                                                                                |                                                            |                                       |                                                                                                                       |                                      |                                                                                                                                                                                                                                                                                                                                                                                                                                                                                                                                         |                                 |             |                                          |                                              |         |                                          |                                |                               |                                |                                                  |          |                                        |
| Urinary sepsis (principal or secondary code)     | Ln(ACR)                       | 1.3 (1.1 – 1.6) <sup>17</sup><br>p=0.005 |                                                                                                |                                                                      |          |                                                                                |                                                            |                                       |                                                                                                                       |                                      |                                                                                                                                                                                                                                                                                                                                                                                                                                                                                                                                         |                                 |             |                                          |                                              |         |                                          |                                |                               |                                |                                                  |          |                                        |
| Non-urinary sepsis (principal)                   | Ln(ACR)                       | 1.4(1.1-1.9) <sup>16</sup>               |                                                                                                |                                                                      |          |                                                                                |                                                            |                                       |                                                                                                                       |                                      |                                                                                                                                                                                                                                                                                                                                                                                                                                                                                                                                         |                                 |             |                                          |                                              |         |                                          |                                |                               |                                |                                                  |          |                                        |
| Non-urinary sepsis (principal or secondary code) | Ln(urea)                      | 4.6 (2.3-9.4) <sup>16</sup><br>p<0.001   |                                                                                                |                                                                      |          |                                                                                |                                                            |                                       |                                                                                                                       |                                      |                                                                                                                                                                                                                                                                                                                                                                                                                                                                                                                                         |                                 |             |                                          |                                              |         |                                          |                                |                               |                                |                                                  |          |                                        |
| James 2008 <sup>[26]</sup>                       | 2001 - 2004                   | Calgary Canada<br>Mean 3.2 years         | General population<br>n=25,675<br>>65 years<br>Mean by eGFR <sup>18</sup><br>55.9% female      | Baseline eGFR<60 mL/min/1.73 m <sup>2</sup> <sup>19</sup><br>n=6,941 | Excluded | Calgary Laboratory Services records                                            | Baseline eGFR ≥60 mL/min/1.73 m <sup>2</sup> <sup>19</sup> | Bloodstream infection                 | Any pathogenic organism isolated from ≥1 blood cultures submitted from the community or ≤2 days of hospital admission | Calgary Laboratory Services records  | <table border="1"> <tr> <td>eGFR mL/min/1.73m<sup>2</sup></td> <td>≥60</td> <td>1</td> </tr> <tr> <td></td> <td>45-59</td> <td>1.17 (0.92–1.49)<sup>20</sup></td> </tr> <tr> <td></td> <td>30-44</td> <td>1.60 (1.20–2.13)<sup>20</sup></td> </tr> <tr> <td></td> <td>&lt;30</td> <td>2.95 (2.11–4.14)<sup>20</sup></td> </tr> </table>                                                                                                                                                                                                 | eGFR mL/min/1.73m <sup>2</sup>  | ≥60         | 1                                        |                                              | 45-59   | 1.17 (0.92–1.49) <sup>20</sup>           |                                | 30-44                         | 1.60 (1.20–2.13) <sup>20</sup> |                                                  | <30      | 2.95 (2.11–4.14) <sup>20</sup>         |
| eGFR mL/min/1.73m <sup>2</sup>                   | ≥60                           | 1                                        |                                                                                                |                                                                      |          |                                                                                |                                                            |                                       |                                                                                                                       |                                      |                                                                                                                                                                                                                                                                                                                                                                                                                                                                                                                                         |                                 |             |                                          |                                              |         |                                          |                                |                               |                                |                                                  |          |                                        |
|                                                  | 45-59                         | 1.17 (0.92–1.49) <sup>20</sup>           |                                                                                                |                                                                      |          |                                                                                |                                                            |                                       |                                                                                                                       |                                      |                                                                                                                                                                                                                                                                                                                                                                                                                                                                                                                                         |                                 |             |                                          |                                              |         |                                          |                                |                               |                                |                                                  |          |                                        |
|                                                  | 30-44                         | 1.60 (1.20–2.13) <sup>20</sup>           |                                                                                                |                                                                      |          |                                                                                |                                                            |                                       |                                                                                                                       |                                      |                                                                                                                                                                                                                                                                                                                                                                                                                                                                                                                                         |                                 |             |                                          |                                              |         |                                          |                                |                               |                                |                                                  |          |                                        |
|                                                  | <30                           | 2.95 (2.11–4.14) <sup>20</sup>           |                                                                                                |                                                                      |          |                                                                                |                                                            |                                       |                                                                                                                       |                                      |                                                                                                                                                                                                                                                                                                                                                                                                                                                                                                                                         |                                 |             |                                          |                                              |         |                                          |                                |                               |                                |                                                  |          |                                        |
| James 2009 <sup>[27]</sup>                       | 2003 -                        | Calgary Canada                           | General population                                                                             | Time updated                                                         | Excluded | Calgary Laboratory                                                             | eGFR 60-104 mL/min/1.73                                    | Pneumonia                             | ICD-10 code for pneumonia any                                                                                         | Hospital discharge                   | <table border="1"> <tr> <td>eGFR mL/min/1.73m<sup>2</sup></td> <td>18-54 years</td> </tr> </table>                                                                                                                                                                                                                                                                                                                                                                                                                                      | eGFR mL/min/1.73m <sup>2</sup>  | 18-54 years |                                          |                                              |         |                                          |                                |                               |                                |                                                  |          |                                        |
| eGFR mL/min/1.73m <sup>2</sup>                   | 18-54 years                   |                                          |                                                                                                |                                                                      |          |                                                                                |                                                            |                                       |                                                                                                                       |                                      |                                                                                                                                                                                                                                                                                                                                                                                                                                                                                                                                         |                                 |             |                                          |                                              |         |                                          |                                |                               |                                |                                                  |          |                                        |

|                           |             |                                |                                                                                                                                                       |                                                                  |         |                           |                                                            |        |                                                                                                             |                                                                                |                                                                                                                                                                                                                                                                                                                                                                                                                                                                                                                                                                                                                                    |
|---------------------------|-------------|--------------------------------|-------------------------------------------------------------------------------------------------------------------------------------------------------|------------------------------------------------------------------|---------|---------------------------|------------------------------------------------------------|--------|-------------------------------------------------------------------------------------------------------------|--------------------------------------------------------------------------------|------------------------------------------------------------------------------------------------------------------------------------------------------------------------------------------------------------------------------------------------------------------------------------------------------------------------------------------------------------------------------------------------------------------------------------------------------------------------------------------------------------------------------------------------------------------------------------------------------------------------------------|
|                           | 2006        | Median 2.5 years               | n=252,516<br>≥18 years<br>Mean by eGFR <sup>21</sup><br><br>42.3% female                                                                              | eGFR<60 mL/min/1.73 m <sup>2</sup> <sup>22</sup><br><br>n=35,948 |         | Services records          | m <sup>2</sup> <sup>22</sup>                               |        | position in hospital discharge report                                                                       | reports                                                                        | 60-104   1<br>45-59   3.23 (2.40–4.36) <sup>23</sup><br>30-44   9.67 (6.36–14.69) <sup>23</sup><br><30   15.04 (9.64–23.47) <sup>23</sup><br>Age 55 – 64 years<br>60-104   1<br>45-59   1.43 (1.11–1.84) <sup>23</sup><br>30-44   1.94 (1.32–2.87) <sup>23</sup><br><30   5.50 (3.83–7.92) <sup>23</sup><br>Age 65 – 74 years<br>60-104   1<br>45-59   1.18 (0.99–1.40) <sup>23</sup><br>30-44   2.24 (1.84–2.73) <sup>23</sup><br><30   3.23 (2.52–4.13) <sup>23</sup><br>Age ≥75 years<br>60-104   1<br>45-59   0.95 (0.85–1.05) <sup>23</sup><br>30-44   1.03 (0.92–1.16) <sup>23</sup><br><30   1.79 (1.55–2.06) <sup>23</sup> |
| Wang 2012 <sup>[28]</sup> | 2003 – 2011 | United States<br>Mean .7 years | General population sample (weighted by age, geography and ethnicity) <sup>24</sup><br><br>n=30,239<br><br>≥45 years<br>69%>60 years<br><br>55% female | Baseline eGFR<60 mL/min/1.73 m <sup>2</sup> <sup>25</sup>        | Unclear | Baseline serum creatinine | Baseline eGFR ≥60 mL/min/1.73 m <sup>2</sup> <sup>25</sup> | Sepsis | Among hospitalisations attributed by participants to serious infection, medical record review <sup>26</sup> | Initially reported by study participants, confirmed with medical record review | 1.99 (1.73–2.29) <sup>27</sup>                                                                                                                                                                                                                                                                                                                                                                                                                                                                                                                                                                                                     |

|                                                             |                                  |                   |                                                       |                                                                                                         |                                                                |          |                                                                                                                                |                                                    |                                                         |                                                                                                                                     |                                                                                                                         |                                                                     |
|-------------------------------------------------------------|----------------------------------|-------------------|-------------------------------------------------------|---------------------------------------------------------------------------------------------------------|----------------------------------------------------------------|----------|--------------------------------------------------------------------------------------------------------------------------------|----------------------------------------------------|---------------------------------------------------------|-------------------------------------------------------------------------------------------------------------------------------------|-------------------------------------------------------------------------------------------------------------------------|---------------------------------------------------------------------|
| 1<br>2<br>3<br>4<br>5<br>6<br>7<br>8<br>9<br>10<br>11<br>12 | Caljouw<br>2011 <sup>[29]</sup>  | 1998<br>-<br>2004 | Leiden<br>The<br>Netherlands<br><br>Mean 2.6<br>years | General<br>population<br>n= 479<br><br>86-90 years<br>All aged 86<br>years at entry<br><br>67.2% female | Creatinine<br>clearance<br><30mL/min <sup>28</sup><br><br>n=43 | Unclear  | Baseline<br>serum<br>creatinine                                                                                                | Creatinine<br>clearance<br>≥30mL/min <sup>28</sup> | UTI                                                     | Diagnosed by<br>treating<br>physician based<br>on signs,<br>symptoms and<br>urine analysis;<br>or death<br>records <sup>29</sup>    | Physician<br>interview and<br>medical record<br>review.<br><br>Statistics<br>Netherlands for<br>cause of death<br>data. | 0.9 (0.5–1.7) (unadjusted)<br>p=0.794                               |
| 13<br>14<br>15<br>16<br>17<br>18<br>19<br>20<br>21<br>22    | Campbell<br>2011 <sup>[21]</sup> | 2009<br>-<br>2010 | England<br>UK<br><br>9 months                         | General<br>population<br>n=43.9 million<br><br>6 months - 64<br>years<br><br>Summary age<br>and sex n/r | Chronic<br>kidney<br>disease<br><br>n=182,000                  | Unclear  | Cases:<br>consultant<br>microbiologist<br>report.<br><br>Denominator:<br>primary care<br>population<br>estimate. <sup>30</sup> | No pre-<br>existing<br>conditions <sup>30</sup>    | Pandemic<br>influenza<br>A(H1N1)                        | Polymerase<br>chain reaction<br>(PCR) test<br>confirmation of<br>pandemic<br>influenza A<br>(H1N1) from a<br>hospital<br>inpatient. | Consultant<br>microbiologist<br>report to<br>national<br>surveillance<br>system.                                        | 17.5 (13.4 – 22.9) <sup>31</sup>                                    |
| 23<br>24<br>25<br>26<br>27<br>28<br>29<br>30<br>31          | USRDS<br>2010 <sup>[20]</sup>    | 2008              | USA<br><br>1 year <sup>32</sup>                       | Medicare<br>patients<br>66+ years                                                                       | Chronic<br>kidney<br>disease                                   | Excluded | Insurance<br>database ICD-<br>9_CM codes <sup>33</sup>                                                                         | No CKD                                             | Pneumonia<br><br>UTI<br><br>Bacteraemia/<br>septicaemia | Principal cause<br>of hospital<br>admission using<br>hospital<br>insurance claim<br>records                                         | ICD-9-CM codes<br>480-486<br><br>ICD-9-CM codes <sup>34</sup><br><br>ICD-9-CM codes<br>038.0 – 038.9                    | 2.76 (unadjusted)<br><br>3.15 (unadjusted)<br><br>3.90 (unadjusted) |

95% CI = 95% confidence interval; n/r = not reported; CKD= chronic kidney disease; UTI = urinary tract infection

1. Controls matched to cases on age at index data (within 1 year), sex, general practice, and calendar time. Estimate adjusted for smoking status, Townsend deprivation score, use of influenza vaccine in previous 12 months, use of pneumococcal vaccine in previous 5 years, number of years of medical records data available in database, and comorbidities including: diabetes, chronic heart disease, chronic respiratory disease, asplenia, cerebrospinal shunt, chronic liver disease, sickle cell disease or coeliac disease, cochlear implant, HIV/AIDS, immunosuppression, stroke or transient ischaemic attack, rheumatoid arthritis, Parkinson's disease, multiple sclerosis, dementia, osteoporosis, and any cancer.

2. Center for American Indian Health surveillance system.

3. Cases and controls matched by gender and age group. Adjusted for age, receipt of pneumococcal polysaccharide vaccine, congestive heart failure, alcohol use, body mass index and unemployment.
4. Adjusted for age, non-English language spoken most at home, living in detached house, living alone, congestive heart failure, chronic obstructive pulmonary disease, dysphagia, functional status using Barthel Index, immunosuppressive medications, nutritional score, tobacco use (lifetime history and secondhand smoke), alcohol consumption and history of regular exposure to gases, fumes or chemicals at home, or at work.
5. Approximate numbers, read from bar graph in publication. No confidence intervals available.
6. Cohort selected for the Cardiovascular Health Study. Exclusion criteria included: inability to provide informed consent or communicate with the interviewer, institutionalisation, being homebound, receipt of hospice care, treatment with radiation or chemotherapy for cancer, or plans to move out of the community within 3 years.
7. Serum cystatin C measured by particle-enhanced immunonephelometric assay, and eGFR calculated using:  $eGFR=6.7 \times CysC^{-1.19}$ .
8. Adjusted for age, sex, race, tobacco use, body mass index, diabetes mellitus, coronary heart disease, stroke, heart failure, cancer, chronic obstructive pulmonary disease, serum albumin, C-reactive protein, interleukin-6.
9. Canadian Institute for Health Information Discharge Abstract database or Ontario Health Insurance Plan database
10. ICD-9 codes 003 1, 036 2 and 038 0 – 038 9.
11. Canadian Institute for Health Information Discharge Abstract database.
12. Adjusted for statins, age, sex, nature of index event, charlson index, healthcare use, malignant disease, chemotherapy, neutropaenia, diabetes mellitus, oral steroids, antineoplastics, other immunosuppressants, history of aspiration, structural lung disease, previous infection (respiratory, GI, skin/soft tissue or other), recent trauma, transplant recipient, heart failure, stroke, chronic liver disease, chronic obstructive pulmonary disease, alcoholism, dementia, Parkinson's disease. Statin and non-statin users matched using propensity scoring for the above factors.
13. Mean age among the 460 participants without asymptomatic bacteriuria, 66.1years (SD11.0): mean age among the 36 participants with asymptomatic bacteriuria, 67.7 years (SD 10.5).
14. ICD-9 or ICD-10 codes for urinary sepsis were those encoding UTI, cystitis, pyelonephritis, orchitis, epididymitis and prostatitis; codes for non-urinary sepsis were those for sepsis, septicaemia and/or abscess.
15. Western Australia Data Linkage System.
16. Adjusted for presence of asymptomatic bacteriuria.
17. Adjusted for presence of asymptomatic bacteriuria and age.
18. Mean age  $\pm$ SD by eGFR.  $\geq 60$ : 74.4 $\pm$ 6.5years. 45-59: 77.5 $\pm$ 7.2 years. 30-44: 79.3 $\pm$ 7.4years.  $<30$ : 78.6 $\pm$ 7.4 years.
19. eGFR calculated using abbreviated Modification of Diet in Renal Disease Study equation (omitting ethnicity) from single outpatient serum creatinine result.
20. Adjusted for age, sex, diabetes mellitus, comorbidity score and care in a CKD clinic.
21. Mean age  $\pm$ SD by eGFR.  $\geq 105$ : 38.7 $\pm$ 14.6. 60-104: 50.9 $\pm$ 15.4. 45-59: 67.0 $\pm$  14.1. 30-44: 74.5 $\pm$ 12.9.  $<30$ : 73.3 $\pm$ 15.2.
22. eGFR calculated using abbreviated Modification of Diet in Renal Disease Study equation (omitting ethnicity) from most recent outpatient serum creatinine result.
23. Adjusted for age, sex, socio-economic status, ethnicity, diabetes mellitus, Charlson comorbidity score.
24. Cohort selected for the Reasons for Geographic and Racial Differences in Stroke (REGARDS) study. Population weighted by age, ethnicity and geography according to local stroke incidence rates.
25. eGFR calculated using CKD-EPI equation.

1  
2  
3  
4  
5  
6  
7  
8  
9  
10  
11  
12  
13  
14  
15  
16  
17  
18  
19  
20  
21  
22  
23  
24  
25  
26  
27  
28  
29  
30  
31  
32  
33  
34  
35  
36  
37  
38  
39  
40  
41  
42  
43  
44  
45  
46  
47  
48  
49

- 26. Medical record review confirming (1) serious infection as major reason for admission and (2)  $\geq 2$  of heart rate  $>90$  beats/minute, temperature  $>38.3^{\circ}\text{C}$  or  $<36^{\circ}\text{C}$ , tachypnoea  $>20$  breaths/minute or leucocytosis.
- 27. Adjusted for age, sex, race, education, income, geographic region, alcohol use and smoking status.
- 28. Creatinine clearance calculated from serum creatinine concentration and weight using Cockcroft-Gault formula.
- 29. Cause of death recorded as UTI (ICD-10 code N39.0)/
- 30. Department of Health-Health Protection Agency influenza vaccine uptake primary care monitoring system data.
- 31. Adjusted for age.
- 32. Smoothed estimate: Models include data from the stated year and the two years preceding it, applying weights of 1,  $\frac{1}{4}$  and  $\frac{1}{8}$  with increasing distance in time.
- 33. ICD-9-CM diagnosis codes recorded in insurance claims during the preceding year: 585.1 – 585.5 (chronic kidney disease stages 1-5); or 585.6 with no ESRD 2728 form or other indication of ESRD.
- 34. Principal hospital admission ICD-9-CM codes: 590-590.9, 595-595.4, 597-597.89, 598, 599.0, 601-601.9, 604-604.9, 607.1-2, 608.0, 608.4, 616.1, 616.3-4, and 616.8.

For peer review only

**Table 2: Summary of risk of bias within studies (quality assessment tool adapted from Higgins *et al.*)[14]**

|                                  | Selection bias:<br>control selection | Selection bias:<br>participation | Selection bias:<br>loss to follow up | Non-differential<br>misclassification:<br>Exposure | Information bias:<br>Exposure | Non-differential<br>misclassification:<br>Outcome | Information bias:<br>Outcome | Confounding | Reverse causation |
|----------------------------------|--------------------------------------|----------------------------------|--------------------------------------|----------------------------------------------------|-------------------------------|---------------------------------------------------|------------------------------|-------------|-------------------|
| <b>Case-control studies</b>      |                                      |                                  |                                      |                                                    |                               |                                                   |                              |             |                   |
| Vinogradova 2009 <sup>[16]</sup> |                                      |                                  | N/A                                  |                                                    |                               |                                                   |                              |             |                   |
| Watt 2007 <sup>[17]</sup>        |                                      |                                  | N/A                                  |                                                    |                               |                                                   |                              |             |                   |
| Loeb 2009 <sup>[18]</sup>        |                                      |                                  | N/A                                  |                                                    |                               |                                                   |                              |             |                   |
| Schnoor 2007 <sup>[19]</sup>     |                                      |                                  | N/A                                  |                                                    |                               |                                                   |                              |             |                   |
| <b>Cohort studies</b>            |                                      |                                  |                                      |                                                    |                               |                                                   |                              |             |                   |
| Higgins 1989 <sup>[22]</sup>     | N/A                                  | N/A                              |                                      |                                                    |                               |                                                   |                              |             |                   |
| Hackam 2006 <sup>[24]</sup>      | N/A                                  | N/A                              |                                      |                                                    |                               |                                                   |                              |             |                   |
| Dalrymple 2012 <sup>[23]</sup>   | N/A                                  | N/A                              |                                      |                                                    |                               |                                                   |                              |             |                   |
| Karunajeewa 2005 <sup>[25]</sup> | N/A                                  | N/A                              |                                      |                                                    |                               |                                                   |                              |             |                   |
| James 2008 <sup>[26]</sup>       | N/A                                  | N/A                              |                                      |                                                    |                               |                                                   |                              |             |                   |
| James 2009 <sup>[27]</sup>       | N/A                                  | N/A                              |                                      |                                                    |                               |                                                   |                              |             |                   |
| Wang 2012 <sup>[28]</sup>        | N/A                                  | N/A                              |                                      |                                                    |                               |                                                   |                              |             |                   |
| Caljouw 2011 <sup>[29]</sup>     | N/A                                  | N/A                              |                                      |                                                    |                               |                                                   |                              |             |                   |
| Campbell 2011 <sup>[21]</sup>    | N/A                                  | N/A                              |                                      |                                                    |                               |                                                   |                              |             |                   |
| USRDS 2010 <sup>[20]</sup>       | N/A                                  | N/A                              |                                      |                                                    |                               |                                                   |                              |             |                   |

**Key to table 2**

Low risk of bias

Uncertain risk of bias

High risk of bias

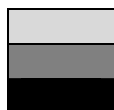

## DISCUSSION

Our comprehensive search strategy identified 14 studies describing an association between kidney disease and acute community-acquired infection. Although between-study heterogeneity precluded meta-analysis, all were consistent with a positive direction of association. The four studies which reported estimates on more than one category of kidney disease all found a graded association in which risk of infection increased with greater severity of CKD. These four studies all excluded patients with end-stage renal disease, and three were at low risk of bias in all categories of quality assessment.[22-23, 26-27]

To our knowledge, this is the first review to address this research question systematically. We used a sensitive search strategy, with a broad definition of kidney disease, for a thorough and inclusive search. The results are consistent with the conclusion of previous narrative reviews: that an association between CKD and infection incidence is likely, but that there is a paucity of evidence.[10-12]

Heterogeneity between the studies precluded meta-analysis of results. Variable study designs and biases may have contributed to heterogeneity: for example, the three case-control studies calculated odds ratios, which may differ from equivalent rate ratios for common infections.[16-18] Failure to control the confounding effects of age, sex and diabetes would be likely to result in overestimation of the effect of CKD on infection. Non-differential misclassification of kidney disease status in studies which relied on routine medical diagnosis would be expected to underestimate the effect of CKD on infection risk. In general the risk of ascertainment bias from increased monitoring for infection among patients with CKD is probably low, although one study assessed risk factors for hospitalisation with influenza during an influenza pandemic, in which context patients with influenza-like symptoms may have been more likely to be tested for influenza A(H1N1) if they also had CKD.[21]

1  
2  
3 The heterogeneity may reflect true differences in effect size between the studies.  
4  
5

6 Firstly, the studies considered a range of outcomes. CKD may have a different effect on the  
7  
8 incidence of different infections. For all but three studies, detection of infection required  
9  
10 either hospital attendance for the infection or a positive blood culture. CKD may affect  
11  
12 severity of infection, as an alternative or in addition to any effect on infection incidence.  
13  
14 CKD may also increase the probability of hospital admission for management of a  
15  
16 moderately severe infection. Either would result in a larger effect of CKD on the risk of  
17  
18 severe infectious outcomes (such as hospitalisation for sepsis) than on less severe infections  
19  
20 (such as community-diagnosed LRTI), and could result in the graded association we  
21  
22 observed, with increasing hospitalisation for patients with more severe stages of CKD.  
23  
24

25  
26  
27 Secondly, the studies included a variety of definitions of kidney disease. For example,  
28  
29 proteinuria (and renal loss of complement) may represent a separate mechanism for risk of  
30  
31 infection than uraemia. For the nine studies which did not exclude patients with ESRD it is  
32  
33 unclear to what extent the results reflect the effect of treatments associated with dialysis, such  
34  
35 as vascular or peritoneal access for dialysis, on infection incidence.  
36  
37

38  
39 Thirdly, the association of CKD with infection may be modified by age. James *et al.*  
40  
41 observed a weaker association of CKD with hospitalisation for pneumonia as age increased.  
42  
43 They suggested that such an observation could be explained by a lower baseline rate of  
44  
45 hospitalisation for pneumonia among younger adults, the natural decline in renal function by  
46  
47 age, and inaccuracy in the estimation of renal function using the Modification of Diet in  
48  
49 Renal Disease (MDRD) Study equation in older populations.[27] As their study population  
50  
51 included only adults who had had a creatinine test result, reasons for testing creatinine could  
52  
53 also be relevant confounders. As age-increases, more comorbidities accrue which require  
54  
55 creatinine tests to guide therapy. Hence, younger people who receive a creatinine test may be  
56  
57  
58  
59  
60



1  
2  
3 at an unusually high risk for both infections and CKD due to the reasons associated with  
4 getting a creatinine test. A real age-dependency of the CKD-infection association would be  
5 consistent with the lower effect of CKD on UTI incidence found among 86–90 year olds  
6 (0.90, 95% CI 0.50–1.77) compared with an adult study population with a mean age of 66  
7 years (1.50, 95% CI 1.10–1.90). However, it may be that the study among the older adults  
8 measured a less severe outcome, and CKD may be associated with other factors that  
9 eventually lead to hospitalisation for UTI.[25, 29]  
10  
11  
12  
13  
14  
15  
16  
17  
18

19 CKD was not a component of the primary study question for nine of the 14 studies, thus there  
20 is a risk that this association may have been reported and published only when CKD was  
21 found to be a risk factor for infection or an important confounder of another relationship. This  
22 would result in selective reporting bias, with a subsequent overestimation of the association  
23 of CKD with infection risk. This bias would be expected to affect smaller studies to a greater  
24 extent, and a funnel plot might show an asymmetry of relative risk estimates about the central  
25 pooled estimate among smaller studies. The sparsely populated funnel plot (**Fig S1**) provides  
26 no clear evidence for or against selective reporting bias, but some evidence of selective  
27 reporting bias comes from within the individual studies. For example, the crude hazard ratio  
28 for the association of creatinine clearance with UTI incidence is reported in Caljouw *et al.*  
29 (0.9, 95% CI 0.5–1.7) but as creatinine clearance was not found to be significant in the  
30 multivariable model the adjusted association is not reported.[29]  
31  
32  
33  
34  
35  
36  
37  
38  
39  
40  
41  
42  
43  
44  
45  
46

47 The overlap in the study populations of the two large cohort studies based in Calgary, Canada  
48 could result in more similar estimates than if the study populations were independent.[26-27]  
49

50 Outcomes in the two studies are likely to be correlated with each other: hospitalisation with  
51 pneumonia could cause a positive blood culture, which would result in one infection being  
52 included as an outcome in both studies. This is unlikely to have a large effect, particularly in  
53  
54  
55  
56  
57  
58  
59  
60

1  
2  
3 qualitative assessment of the combined evidence, as the potential overlap of person-time is  
4  
5 limited.  
6  
7

8  
9 Although we excluded study populations routinely treated with specialist medication (unless  
10 for kidney disease), some study populations may have been at higher risk of infection than  
11 the general population, and this may have affected the relationship of CKD to infection. For  
12 example, the cohort of patients admitted for an acute cardiovascular event or an arterial  
13 revascularisation procedure will have had a higher prevalence of co-morbidities (such as  
14 diabetes) than the general population and excluded patients with severe co-morbidities who  
15 did not survive an acute cardiovascular event, or who were not fit enough to undergo the  
16 procedure.[24] Each of the selected study populations limits the generalisability of the  
17 individual study result, but the qualitatively similar findings across the variety of study  
18 populations, and their qualitative consistency with the four studies based among the general  
19 population,[5, 16, 21, 29] support a positive association between CKD and infection risk in a  
20 variety of study populations.  
21  
22  
23  
24  
25  
26  
27  
28  
29  
30  
31  
32  
33  
34  
35

36 A few large, high quality studies which excluded patients with ESRD have found a graded  
37 association between pre-dialysis CKD and risk of hospitalisation with infection. All studies  
38 identified in this review were compatible with a positive association of CKD with increased  
39 infection risk. There are little data available on the association of CKD with infection  
40 incidence using less severe outcome measures than hospitalisation, and it is not possible in  
41 most studies to distinguish an effect on susceptibility to infection from an effect on the  
42 severity of infection.  
43  
44  
45  
46  
47  
48  
49  
50  
51

52 The potential age-dependency of the relationship between CKD and infection is intriguing  
53 and needs further research. There is also currently no evidence on the relationship between  
54 proteinuria and infection incidence independently of glomerular filtration rate. Future studies  
55  
56  
57  
58  
59  
60

1  
2  
3 should identify infections in the community in addition to hospitalisations for infection,  
4  
5 characterise the association of proteinuria adjusted for glomerular filtration rate, explore the  
6  
7 age-dependency of the association, and assess vaccine efficacy among older people with  
8  
9  
10 CKD.  
11  
12  
13  
14  
15  
16  
17  
18  
19  
20  
21  
22  
23  
24  
25  
26  
27  
28  
29  
30  
31  
32  
33  
34  
35  
36  
37  
38  
39  
40  
41  
42  
43  
44  
45  
46  
47  
48  
49  
50  
51  
52  
53  
54  
55  
56  
57  
58  
59  
60

For peer review only

**Contributor statement:**

All authors designed the study strategy including the search terms, inclusion and exclusion criteria. HM performed the search, study selection and data extraction. DN screened the randomly selected sample of 100 abstracts. All authors agreed quality assessment of included papers and interpretation of results by discussion. HM drafted the article, which DN and ST revised. All authors approved the final version of the manuscript.

**Funding statement:** This report is independent research arising from a Career Development Fellowship supported by the National Institute for Health Research, awarded to Dr Thomas (grant number CDF 2010-03-32). HM is funded by a Kidney Research UK studentship, grant reference ST2/2011. The views expressed in this publication are those of the authors and not necessarily those of the UK National Health Service, the National Institute for Health Research, the Department of Health, or Kidney Research UK. The funders of the study had no role in the study design, data collection, analysis or interpretation, decision to publish, or preparation of the manuscript.

**Competing interests statement:**

H I McDonald: None. S L Thomas: None. D Nitsch: None to declare.

**Data sharing statement:**

All data, including full search terms and eligibility criteria, are available either in the article or as online supplementary material submitted with this manuscript.

## REFERENCES

1. Coresh J, Selvin E, Stevens LA, et al. Prevalence of chronic kidney disease in the United States. *JAMA*. 2007 Nov 7;298(17):2038-47.
2. Collins AJ, Foley R, Herzog C, et al. United States Renal Data System 2007 Annual Data Report Abstract. *Am J Kidney Dis*. 2008;51(1):A6-A7.
3. Sarnak MJ, Jaber BL. Mortality caused by sepsis in patients with end-stage renal disease compared with the general population. *Kidney Int*. 2000 Oct;58(4):1758-64.
4. Sarnak MJ, Jaber BL. Pulmonary infectious mortality among patients with end-stage renal disease. *Chest*. 2001 Dec;120(6):1883-7.
5. Morbidity and Mortality in Patients With Chronic Kidney Disease. *Am J Kidney Dis*. 2012;59(1):e59-e68.
6. Naqvi SB, Collins AJ. Infectious complications in chronic kidney disease. *Adv Chronic Kidney Dis*. 2006 Jul;13(3):199-204.
7. Viasus D, Garcia-Vidal C, Cruzado JM, et al. Epidemiology, clinical features and outcomes of pneumonia in patients with chronic kidney disease. *Nephrol Dial Transplant*. 2011 Sep;26(9):2899-906.
8. Kausz AT, Gilbertson DT. Overview of vaccination in chronic kidney disease. *Adv Chronic Kidney Dis*. 2006 Jul;13(3):209-14.
9. Allon M, Depner TA, Radeva M, et al. Impact of dialysis dose and membrane on infection-related hospitalization and death: results of the HEMO Study. *J Am Soc Nephrol*. 2003 Jul;14(7):1863-70.
10. Dalrymple LS, Go AS. Epidemiology of acute infections among patients with chronic kidney disease. *Clin J Am Soc Nephrol*. 2008 Sep;3(5):1487-93.
11. Foley RN. Infections in patients with chronic kidney disease. *Infect Dis Clin North Am*. 2007 Sep;21(3):659-72, viii.
12. Foley RN. Infections and cardiovascular disease in patients with chronic kidney disease. *Adv Chronic Kidney Dis*. 2006 Jul;13(3):205-8.
13. The World Bank. Country and lending groups. 2012 [6 June 2013]; Available from: <http://data.worldbank.org/about/country-classifications/country-and-lending-groups>.
14. Higgins JP, Altman DG, Gotzsche PC, et al. The Cochrane Collaboration's tool for assessing risk of bias in randomised trials. *BMJ*. 2011;343:d5928.
15. Higgins JP, Thompson SG, Deeks JJ, et al. Measuring inconsistency in meta-analyses. *BMJ*. 2003 Sep 6;327(7414):557-60.
16. Vinogradova Y, Hippisley-Cox J, Coupland C. Identification of new risk factors for pneumonia: population-based case-control study. *Br J Gen Pract*. 2009 Oct;59(567):e329-38.
17. Watt JP, O'Brien KL, Benin AL, et al. Risk factors for invasive pneumococcal disease among Navajo adults. *Am J Epidemiol*. 2007 Nov 1;166(9):1080-7.
18. Loeb M, Neupane B, Walter SD, et al. Environmental risk factors for community-acquired pneumonia hospitalization in older adults. *Journal of the American Geriatrics Society*. 2009 Jun;57(6):1036-40.
19. Schnoor M, Klante T, Beckmann M, et al. Risk factors for community-acquired pneumonia in German adults: the impact of children in the household. *Epidemiol Infect*. 2007 Nov;135(8):1389-97.
20. Collins AJ, Foley RN, Herzog C, et al. US Renal Data System 2010 Annual Data Report. *Am J Kidney Dis*. 2011 Jan;57(1 Suppl 1):A8, e1-526.

21. Campbell CNJ, Mytton OT, McLean EM, et al. Hospitalization in two waves of pandemic influenza A(H1N1) in England. *Epidemiology & Infection*. 2011 Oct;139(10):1560-9.
22. Higgins RM. Infections in a renal unit. *Q J Med*. 1989 Jan;70(261):41-51.
23. Dalrymple LS, Katz R, Kestenbaum B, et al. The risk of infection-related hospitalization with decreased kidney function. *Am J Kidney Dis*. 2012 Mar;59(3):356-63.
24. Hackam DG, Mamdani M, Li P, et al. Statins and sepsis in patients with cardiovascular disease: a population-based cohort analysis. *Lancet*. 2006 Feb 4;367(9508):413-8.
25. Karunajeewa H, McGeachie D, Stuccio G, et al. Asymptomatic bacteriuria as a predictor of subsequent hospitalisation with urinary tract infection in diabetic adults: The Fremantle Diabetes Study. *Diabetologia*. 2005 Jul;48(7):1288-91.
26. James MT, Laupland KB, Tonelli M, et al. Risk of bloodstream infection in patients with chronic kidney disease not treated with dialysis. *Arch Intern Med*. 2008 Nov 24;168(21):2333-9.
27. James MT, Quan H, Tonelli M, et al. CKD and risk of hospitalization and death with pneumonia. *Am J Kidney Dis*. 2009 Jul;54(1):24-32.
28. Wang HE, Shapiro NI, Griffin R, et al. Chronic medical conditions and risk of sepsis. *PLOS ONE*. 2012;7(10):e48307.
29. Caljouw MA, den Elzen WP, Cools HJ, et al. Predictive factors of urinary tract infections among the oldest old in the general population. A population-based prospective follow-up study. *BMC Med*. 2011;9:57.

**FIGURE LEGENDS****Figure 1: Flow chart of study selection****Figure 2: Forest plot of all estimates of the association of CKD with infection(n=17)****from all 14 studies identified**

UTI: urinary tract infection

The estimates from Higgin 1985 and USRDS 2010 did not include standard errors.

Dalrymple 2012: Presented estimates compare eGFR 45-59 with eGFR  $\geq 90$ mL/min/1.73m<sup>2</sup>

James 2009: Presented estimates compare eGFR 45-59 with eGFR 60-104

mL/min/1.73m<sup>2</sup>

James 2008: Presented estimates compare estimated glomerular filtration rate (eGFR)

45-59 with eGFR  $\geq 60$  mL/min/1.73m<sup>2</sup>

1  
2  
3  
4  
5  
6  
7  
8  
9  
10  
11  
12  
13  
14  
15  
16  
17  
18  
19  
20  
21  
22  
23  
24  
25  
26  
27  
28  
29  
30  
31  
32  
33  
34  
35  
36  
37  
38  
39  
40  
41  
42  
43  
44  
45  
46  
47  
48  
49  
50  
51  
52  
53  
54  
55  
56  
57  
58  
59  
60

For peer review only



1  
2  
3 **Title: Chronic kidney disease as a risk factor for acute community-acquired infections**  
4  
5 **in high-income countries: a systematic review**  
6  
7

8 **Authors:** Helen I McDonald,<sup>1</sup> Sara L Thomas,<sup>2</sup> Dorothea Nitsch.<sup>1</sup>  
9

10  
11 1. Department of Non-communicable Disease Epidemiology, London School of Hygiene &  
12 Tropical Medicine, Keppel Street, London, UK.  
13

14  
15 2. Department of Infectious Disease Epidemiology, London School of Hygiene & Tropical  
16 Medicine, Keppel Street, London, UK.  
17  
18  
19

20  
21  
22 **Corresponding author:**  
23

24  
25 Helen I McDonald  
26

27  
28 Faculty of Epidemiology and Population Health, London School of Hygiene & Tropical  
29 Medicine, Keppel Street, London, UK WC1E 7HT. Tel: +44 (0)20 7636 8636 ext 2247. Fax:  
30  
31 N/A. E-mail: [helen.mcdonald@lshtm.ac.uk](mailto:helen.mcdonald@lshtm.ac.uk)  
32  
33

34  
35  
36 **Keywords:** Community-acquired infections, Chronic Renal Insufficiency, Systematic review,  
37 Risk factors.  
38  
39

40  
41  
42 **Word counts:**  
43

44  
45 Abstract: 246 words  
46

47  
48 Body: ~~3,1343,206~~ words  
49  
50  
51  
52  
53  
54  
55  
56  
57  
58  
59  
60

**ABSTRACT:**

**Objectives:** A systematic review of the association of pre-dialysis chronic kidney disease (CKD) with the incidence of acute, community-acquired infections.

**Design:** We searched Medline, Embase and Cochrane databases (inception to 16/01/2014) for studies analysing the association of pre-dialysis kidney disease with the incidence of acute, community-acquired urinary tract infection (UTI), lower respiratory tract or central nervous system infections, or sepsis. Studies were required to include at least 30 participants with and without kidney disease.

**Setting & participants:** Community-based populations of adults in high income countries.

**Outcome measures:** Acute, community-acquired urinary tract infection (UTI), lower respiratory tract or central nervous system infections, or sepsis.

**Results:** We identified 14 eligible studies. Estimates from two studies lacked 95% confidence intervals and standard errors. The remaining 12 studies yielded 17 independent effect estimates. Only three studies included infections managed in the community. Quality assessment revealed that probable misclassification of kidney disease status and poor adjustment for confounding were common. There was evidence from a few large high quality studies of a graded association between pre-dialysis CKD stage and hospitalisation for infection. One study found an interaction with age, with a declining effect of CKD on infection risk as age increased. There was evidence of between-studies heterogeneity ( $I^2=96.5\%$ ,  $p<0.001$ ) which persisted in subgroup analysis, and thus meta-analysis was not performed.

1  
2  
3  
4  
5  
6  
7  
8  
9  
10  
11  
12  
13  
14  
15  
16  
17  
18  
19  
20  
21  
22  
23  
24  
25  
26  
27  
28  
29  
30  
31  
32  
33  
34  
35  
36  
37  
38  
39  
40  
41  
42  
43  
44  
45  
46  
47  
48  
49  
50  
51  
52  
53  
54  
55  
56  
57  
58  
59  
60

**Conclusions:** Pre-dialysis kidney disease appears to be associated with increased risk of severe infection. Whether pre-dialysis kidney disease increases the susceptibility to infections and whether age modifies this association remains unclear.

For peer review only

## ARTICLE SUMMARY

### Article focus:

- This review sought to assess systematically whether pre-dialysis chronic kidney disease (CKD) is a risk factor for the incidence of acute, community-acquired urinary tract infection (UTI), lower respiratory tract infection (LRTI) central nervous system (CNS) infection, or sepsis, among community-based adults in high income countries.
- Any increased risk of infection incidence at early stages of CKD would affect a large and growing number of patients. Awareness and quantification of this risk could have benefits for patient management, more effective vaccination strategies and healthcare planning.

### Key messages:

- We identified major gaps in the literature including: a scarcity of high-quality studies on this research topic; a lack of studies using less severe outcome measures than hospitalisation, to allow any association of CKD with susceptibility to infection to be distinguished from an association with severity of infection; and a lack of data on the relationship between proteinuria and infection incidence independently of glomerular filtration rate.
- All studies were consistent with a positive association between CKD and infection risk.

### Strengths and limitations of this study:

- This study used a sensitive search strategy, with a broad definition of kidney disease, for a thorough and inclusive search.

1  
2  
3  
4  
5  
6  
7  
8  
9  
10  
11  
12  
13  
14  
15  
16  
17  
18  
19  
20  
21  
22  
23  
24  
25  
26  
27  
28  
29  
30  
31  
32  
33  
34  
35  
36  
37  
38  
39  
40  
41  
42  
43  
44  
45  
46  
47  
48  
49  
50  
51  
52  
53  
54  
55  
56  
57  
58  
59  
60

- Between-study heterogeneity, and the low quality of many of the studies, limit interpretation of results of the studies currently available.

For peer review only

## INTRODUCTION

Chronic kidney disease (CKD) is common, and its prevalence is increasing.[1] Infection is a major cause of mortality in end-stage renal disease (ESRD) and hospitalisation at all stages of CKD. The second commonest cause of death among ESRD patients in the US is septicaemia, and patients with ESRD are at increased risk of death from infection compared to the general population.[2-4] Both ESRD and pre-dialysis patients with CKD in the US are at higher risk of hospitalisation for infection than the general population.[2, 5-6] Pre-dialysis CKD has been found to increase mortality among patients hospitalised with infections.[7]

Increased mortality and hospitalisation from infection could be driven by increased severity of infection, i.e. once an infection is present, the course of the associated illness is more severe, or increased incidence, i.e. CKD may make people more susceptible to develop an infection. Patients with CKD display impaired host immunity: reduced vaccination responsiveness is observed at all stages of CKD.[8]

Among ESRD patients, aspects of dialysis, such as vascular and peritoneal access for dialysis, may be a risk factor for infection incidence and severity. However, this does not tell the whole story, and only 23% of infection-related hospitalisations among haemodialysis patients in the US were identified as related to vascular access in the HEMO study.[9] Risk factors for infection identified among ESRD patients which are not related to renal replacement therapy, and could apply at all stages of pre-dialysis CKD, include: the causes and treatment of kidney disease; co-morbidities; reduced vaccine effectiveness; and high levels of exposure to health care facilities.[10]

If there is an increased risk of infection incidence at early stages of CKD, this would affect a large and growing number of patients. Awareness and quantification of this risk could have

1  
2  
3 benefits for patient management, more effective vaccination strategies and healthcare  
4  
5 planning.  
6  
7

8 Narrative reviews have concluded that it is likely that CKD in itself increases infection  
9  
10 incidence, but reported a lack of evidence.[10-12] We are not aware of any relevant  
11  
12 systematic literature reviews of the effect of CKD on infection incidence.  
13  
14

15  
16 This review sought to assess systematically whether pre-dialysis CKD is a risk factor for the  
17  
18 incidence of acute, community-acquired urinary tract infection (UTI), lower respiratory tract  
19  
20 infection (LRTI) central nervous system (CNS) infection, or sepsis, among community-based  
21  
22 adults in high income countries.  
23  
24  
25  
26  
27  
28  
29  
30  
31  
32  
33  
34  
35  
36  
37  
38  
39  
40  
41  
42  
43  
44  
45  
46  
47  
48  
49  
50  
51  
52  
53  
54  
55  
56  
57  
58  
59  
60

## METHODS

### Data Sources and Searches

One reviewer (HM) searched the Medline and Embase databases, and the Cochrane library, from inception to 16 January 2014. The search strategies combined text words and MeSH terms for three concepts: acute community-acquired infection (either sepsis, UTI, LRTI or CNS infection); kidney disease; and relative risk. We used search terms to identify studies among adult humans in high-income countries (according to the World Bank classification),[13] and limited the search to articles in English, French or German. The full strategies are available in **Supplementary Tables 1-3**.

We searched the reference lists of all included studies and any pertinent review articles to identify further eligible studies.

### Study Selection

One reviewer (HM) screened titles and abstracts, reviewed the full-text of identified studies and made initial decisions on eligibility according to pre-specified inclusion criteria (**Supplementary Table 4**). Any borderline cases were discussed between HM, DN and ST. A second reviewer (DN) checked a sample of 100 abstracts, selected randomly after de-duplication of records, and a kappa statistic was calculated to describe agreement in selection of studies.

Eligible studies analysed the effect of pre-dialysis kidney disease on the relative risk of at least one of the four specified acute, community-acquired infections among community-based adults in high-income countries. We excluded study populations managed in secondary



1  
2  
3 care (unless for kidney disease), routinely treated with immunosuppressants, or exclusively of  
4  
5 pregnant women, as these groups have a raised risk of infection, and the relationship of CKD  
6  
7 to infection risk may be different among these groups compared to that in the general adult  
8  
9 population in primary care. Ascertainment of CKD, as a silent disease, and, to a certain  
10  
11 extent, ascertainment of acute community-acquired infections, are dependent on high levels  
12  
13 of monitoring and good access to healthcare, so we restricted our search to high-income  
14  
15 countries. Chronic infections such as tuberculosis were not included, as the relationship  
16  
17 between CKD and chronic infection is very likely to differ from that between CKD and acute  
18  
19 infections, which was our focus in this review.  
20  
21  
22  
23

24 To maximise the sensitivity of our search strategy, we accepted a wide range of definitions of  
25  
26 kidney disease, including: medical diagnosis of kidney disease, reduced estimated  
27  
28 glomerular filtration rate or creatinine clearance, elevated creatinine, proteinuria, micro- or  
29  
30 macro-albuminuria, and renal structural abnormalities. We also accepted definitions which  
31  
32 included some patients with ESRD among the patients with CKD, but excluded definitions  
33  
34 which were exclusively patients receiving renal replacement therapy.  
35  
36  
37

38 Outcomes of interest were relative risk estimates of acute community-acquired LRTIs, UTIs,  
39  
40 CNS infections or sepsis. We accepted outcomes describing incidence of severe infections  
41  
42 (such as hospitalisation with pneumonia).  
43  
44

45 We restricted our search to published studies which were sufficiently large to include at least  
46  
47 30 participants with and without kidney disease, to allow reasonable precision of the study  
48  
49 estimate. Detailed eligibility criteria are listed in **Supplementary Table 4**.  
50  
51

## 52 **Data Extraction and Quality Assessment**

53  
54  
55  
56  
57  
58  
59  
60

1  
2  
3 Data were extracted from relevant studies using a pre-specified collection form. Study  
4  
5 characteristics extracted included study design, data source, any participant exclusion criteria,  
6  
7 number of participants, age, gender, baseline renal function, definition of renal impairment,  
8  
9 definition of the outcome infection. An estimate of relative risk (rate ratio, risk ratio or odds  
10  
11 ratio) with any measures taken to address confounding was extracted from each eligible  
12  
13 independent analysis in each study. Studies with no confidence intervals and for which the  
14  
15 standard error was not calculable from the data presented were included in the review but not  
16  
17 considered for meta-analysis.  
18  
19

20  
21 When multiple estimates were available from a study but were not independent, a single  
22  
23 estimate was identified for potential meta-analysis by selecting the estimate best adjusted for  
24  
25 confounding, using the most recent data, comparing the level of CKD most common in the  
26  
27 general population with no CKD.  
28  
29

30  
31 Study quality was assessed using a pre-specified tool adapted from Higgins *et al.* for  
32  
33 observational studies.[14] Studies were assigned a high, low or uncertain risk of each of:  
34  
35 selection bias, non-differential measurement error for exposure and outcome, information  
36  
37 bias in exposure and outcome, confounding and reverse causation. The minimum requirement  
38  
39 for a low risk of bias from confounding was appropriate management of confounding by age,  
40  
41 sex and diabetes. Specific criteria used are detailed in **Supplementary Table 5**.  
42  
43  
44

#### 45 46 **Data Synthesis and Analysis**

47  
48 The relationship between CKD and UTIs was considered likely to differ from that of CKD to  
49  
50 other infections, due to potential reverse causality. For example, repeat UTIs may cause  
51  
52 kidney disease, or structural kidney disease may be identified though investigation of repeat  
53  
54 UTIs. Therefore in all quantitative analysis, UTIs were analysed separately from other  
55  
56 infections.  
57  
58  
59  
60

1  
2  
3 Estimates were examined for heterogeneity using Cochran's Q statistic and the  $I^2$  statistic as  
4 described by Higgins *et al.*[15] If  $I^2$  was less than 50% and Cochran's Q statistic  $p \geq 0.1$ ,  
5  
6  
7 fixed-effects meta-analysis was considered for each of the two categories (UTI, and other  
8  
9  
10 infections). Funnel plots were constructed to look for publication bias. All analysis was  
11  
12 conducted using STATA version 12.0.  
13  
14  
15  
16  
17  
18  
19  
20  
21  
22  
23  
24  
25  
26  
27  
28  
29  
30  
31  
32  
33  
34  
35  
36  
37  
38  
39  
40  
41  
42  
43  
44  
45  
46  
47  
48  
49  
50  
51  
52  
53  
54  
55  
56  
57  
58  
59  
60

For peer review only

## RESULTS

The database searches identified 10,380 citations, of which 1,204 were duplicates (**Figure 1**).

Both reviewers had 100% agreement on which studies to extract for full-text analysis from screening a random sample of 100 abstracts (Cohen's  $K = 1$ ).

We identified 14 eligible studies, with varying study characteristics (**Table 1**). Four studies were case-control studies,[16-19] and ten were cohort studies.[20-29] Seven studies investigated a range of risk factors for infection,[16-19, 21, 28-29] two studies reported the effect of CKD on infection as a confounder of the effect of interest,[24-25] and five studies investigated the effect of CKD on infection risk as their primary research question.[5, 20, 22, 26-27]

Seven studies were based among the general population.[5, 16, 19, 21, 23, 28-29] Other study populations included: attendants at a specialist renal clinic,[22] patients with diabetes mellitus,[25] patients admitted to hospital for an acute cardiovascular event or an arterial revascularisation procedure, [24] and the Navajo Nation – a population which experiences 3–5 times higher rates of invasive pneumococcal disease than the general US population.[17] The population of the cohort studies in Calgary, Canada were adults with a serum creatinine test result available in their medical records.[26-27] There is some overlap in the study populations of these two cohort studies: residents aged over 65 years with a serum creatinine measurement between 1 July 2001 and 31 December 2001 and also between 1 July 2003 and 30 June 2004 would have been included in both studies for the period from the second creatinine measurement until 31 December 2004.[26-27]

Definitions of kidney disease included medical diagnoses of chronic renal disease, elevated creatinine levels, impaired creatinine clearance, and structural abnormalities of the kidney.

Five studies excluded patients with ESRD, and one specified the number included, but for the

1  
2  
3 remaining eight studies it was unclear how many of the included patients received renal  
4  
5 replacement therapy (**Table 1**).

6  
7  
8 Three studies recorded infections diagnosed in primary care or outpatients,[16, 19, 29] two  
9  
10 recorded infections identified from a positive culture result,[17, 26] one included infections  
11  
12 diagnosed in the emergency department,[18] seven required hospital admission for  
13  
14 infection,[5, 21, 23-25, 27-28] and for one study the definition and severity of infection was  
15  
16 unclear.[22]

17  
18  
19 For two studies, the results extracted had no confidence interval or standard error and these  
20  
21 could not be calculated from the reported data. From the remaining 12 studies, 17  
22  
23 independent effect estimates with standard errors were available for meta-analysis, among  
24  
25 which UTI was the outcome in three estimates.

26  
27  
28 For all infections there was strong evidence of considerable heterogeneity (Cochran's Q  
29  
30 statistic  $p < 0.001$ ,  $I^2 = 96.5\%$ ). This persisted when estimates for UTIs were excluded  
31  
32 ( $p < 0.001$ ,  $I^2 = 97.2\%$ ), when considering LRTIs alone ( $p < 0.001$ ,  $I^2 = 98.2\%$ ), when limited to  
33  
34 cohort studies ( $p < 0.001$ ,  $I^2 = 97.3\%$ ), and when stratified by exclusion of patients with ESRD  
35  
36 (ESRD excluded,  $p < 0.001$ ,  $I^2 = 88.9\%$ ; ESRD not excluded  $p < 0.001$ ,  $I^2 = 97.2\%$ ). Due to this  
37  
38 heterogeneity, meta-analysis was not performed.

39  
40  
41 All results are displayed in the Forest plot (**Figure 2**). Despite the quantitative heterogeneity,  
42  
43 the results were qualitatively similar: all estimates were compatible with a positive  
44  
45 association between kidney disease and infection. The four studies which compared different  
46  
47 stages of CKD found a graded association of increased risk of infection with more severe  
48  
49 CKD. These studies all excluded patients with end-stage renal disease.[22-23, 26-27] One  
50  
51 study found that the effect of CKD on infection risk was modified by age, with a declining  
52  
53 effect of CKD on infection risk as age increased.[27] This effect was consistent with the  
54  
55  
56  
57  
58  
59  
60

1  
2  
3 lower effect of CKD on UTI incidence found among 86–90 year olds (0.90, 95% CI 0.50–  
4  
5 1.77) compared with an adult study population with a mean age of 66 years (1.50, 95% CI  
6  
7 1.10–1.90).[25, 29]  
8  
9

10 The funnel plot was sparsely populated, with widely scattered effect estimates, and provides  
11  
12 no clear evidence for or against publication bias (**Supplementary Figure 1**).  
13  
14

15  
16 Study quality was variable. Relying on routine medical diagnosis introduced a potential  
17  
18 source of misclassification of kidney disease status for seven studies.[5, 16-19, 21, 24] There  
19  
20 was variable adjustment for confounding, from unadjusted crude estimates to estimates  
21  
22 adjusted for a range of comorbidities, demographic and socio-economic factors. Six studies  
23  
24 did not meet this review’s minimal requirements.[19, 21-22, 25, 28-29] The summarised  
25  
26 results are displayed in **Table 2**, and the full quality assessment is in **Supplementary Table**  
27  
28  
29 **5**.  
30  
31  
32  
33  
34  
35  
36  
37  
38  
39  
40  
41  
42  
43  
44  
45  
46  
47  
48  
49  
50  
51  
52  
53  
54  
55  
56  
57  
58  
59  
60

Table 1: Characteristics of eligible studies (n=14)

| Case-control studies             |             |                                 |                                                                                                                       |                       |                                    |                                                                      |                               |                                                                                                                                   |                                                    |                           |                   |                                          |
|----------------------------------|-------------|---------------------------------|-----------------------------------------------------------------------------------------------------------------------|-----------------------|------------------------------------|----------------------------------------------------------------------|-------------------------------|-----------------------------------------------------------------------------------------------------------------------------------|----------------------------------------------------|---------------------------|-------------------|------------------------------------------|
|                                  | Study       |                                 |                                                                                                                       | Kidney disease        |                                    |                                                                      | Infection                     |                                                                                                                                   |                                                    | Kidney disease prevalence |                   | Odds ratio (95% CI)                      |
|                                  | Date        | Setting                         | Population<br>Age<br>% Female                                                                                         | Defined               | ESRD included                      | Ascertained                                                          | Type                          | Defined                                                                                                                           | Ascertained                                        | Cases                     | Controls          |                                          |
| Vinogradova 2009 <sup>[16]</sup> | 1996 - 2005 | UK                              | General population<br><br>Any age<br>Median age band 45-64 years<br><br>Cases 49.3%, controls 49.1%                   | Chronic renal disease | Unclear                            | Primary care medical record diagnosis code in previous 5 years       | Pneumonia                     | Medical diagnosis recorded in primary care records                                                                                | READ code in primary care medical records          | 203/17,172 (1.2%)         | 386/71,299 (0.5%) | 1.72 (1.3 – 2.07) <sup>1</sup>           |
| Watt 2007 <sup>[17]</sup>        | 1999 - 2002 | The Navajo Nation<br><br>USA    | Navajo adults<br><br>≥18 years<br><br>Summary age and sex n/r                                                         | Chronic renal failure | 17 participants receiving dialysis | Medical record abstraction                                           | Invasive pneumococcal disease | S.pneumoniae isolated from a normally sterile body fluid during illness                                                           | Active laboratory surveillance system <sup>2</sup> | 20/118 (16.9%)            | 12/353 (3.4%)     | 2.6 (0.87 – 7.7) <sup>3</sup><br>P=0.087 |
| Loeb 2009 <sup>[18]</sup>        | 2002 - 2005 | Ontario & Alberta<br><br>Canada | General population<br><br>≥ 65 years<br>Mean age: cases 79.1, controls 74.4 years.<br><br>Cases 39.6%, controls 68.5% | Renal disease         | Unclear                            | Cases: hospital interview.<br>Controls: telephone interview at home. | Pneumonia                     | Consistent chest X-ray and ≥2 of: chest pain, shortness of breath, productive cough, temperature >38°C, crackles on auscultation. | Recruited patients attending emergency departments | 127/690 (18.4%)           | 38/82 (4.4%)      | 4.06 (1.98–8.35) <sup>4</sup><br>P<0.001 |
| Schnoor                          | 2002        | Germany                         | General                                                                                                               | Chronic               | Unclear                            | Cases:                                                               | Pneumonia                     | (1) Infiltrate on chest                                                                                                           | Community-                                         | 49/1128                   | 27/1044           | 1.7 (1.1–2.8)                            |

|                      |           |  |                                                                                                                       |               |  |                                                                          |  |                                                                                                                                                                                         |                                                                                         |        |        |                        |
|----------------------|-----------|--|-----------------------------------------------------------------------------------------------------------------------|---------------|--|--------------------------------------------------------------------------|--|-----------------------------------------------------------------------------------------------------------------------------------------------------------------------------------------|-----------------------------------------------------------------------------------------|--------|--------|------------------------|
| 2007 <sup>[19]</sup> | –<br>2005 |  | population<br><br>>18 years<br>Mean age:<br>cases 57,<br>controls 57.5<br>years<br><br>Cases 44.8%,<br>controls 54.7% | renal disease |  | reporting<br>physician.<br>Controls: self-<br>reported<br>questionnaire. |  | X-ray or (2)<br>temperature ≥38.3°C<br>with any of: cough,<br>purulent sputum,<br>positive auscultation.<br>Excluded if<br>hospitalised within<br>prior 4 weeks, or<br>immunodeficient. | acquired<br>pneumonia<br>network<br>registry reports<br>(primary and<br>secondary care) | (4.3%) | (2.6%) | (unadjusted)<br>P<0.05 |
|----------------------|-----------|--|-----------------------------------------------------------------------------------------------------------------------|---------------|--|--------------------------------------------------------------------------|--|-----------------------------------------------------------------------------------------------------------------------------------------------------------------------------------------|-----------------------------------------------------------------------------------------|--------|--------|------------------------|

**Cohort studies**

|                                | Study       |                                      |                                                                                                                                   | Kidney disease                                               |          |                     | Comparison group                               | Infection                      |                                                                                                    |                                                                                      | Risk or rate ratio (95% CI)    |                               |
|--------------------------------|-------------|--------------------------------------|-----------------------------------------------------------------------------------------------------------------------------------|--------------------------------------------------------------|----------|---------------------|------------------------------------------------|--------------------------------|----------------------------------------------------------------------------------------------------|--------------------------------------------------------------------------------------|--------------------------------|-------------------------------|
|                                | Date        | Setting<br><br>Follow up time        | Population Number<br>Age<br>Sex                                                                                                   | Defined Number with kidney disease                           | ESRD     | Ascertained         | Defined                                        | Type                           | Defined                                                                                            | Ascertained                                                                          |                                |                               |
| Higgins 1989 <sup>[22]</sup>   | 1985        | Oxford UK<br><br>1 year              | Patients attending a Renal Unit with chronic renal failure<br><br>n=211<br><br>17-77 years<br>Mean 50.5 years<br><br>% female n/r | Creatinine ≥250 µmol/l<br><br>Number n/r                     | Excluded | Serum creatinine    | Creatinine <250 µmol/l                         | UTI                            | >10 <sup>5</sup> organism/ml and ≥10 leucocytes /hpf in clean catch urine specimen                 | Medical record review                                                                | Creatinine µmol/l              |                               |
|                                |             |                                      |                                                                                                                                   |                                                              |          |                     |                                                |                                |                                                                                                    |                                                                                      | <250                           | 1                             |
|                                |             |                                      |                                                                                                                                   |                                                              |          |                     |                                                |                                |                                                                                                    |                                                                                      | 250-500                        | 1.5 <sup>5</sup>              |
|                                |             |                                      |                                                                                                                                   |                                                              |          |                     |                                                |                                |                                                                                                    |                                                                                      | >500                           | 2 <sup>5</sup>                |
| Dalrymple 2012 <sup>[23]</sup> | 1989 – 2007 | United States<br><br>Mean 11.5 years | General community-dwelling population <sup>6</sup><br><br>n=5,142<br><br>>65 years<br>Mean 72 years                               | Baseline eGFR<90 mL/min/1.73 m <sup>2,7</sup><br><br>n=3,863 | Excluded | Baseline cystatin C | Baseline eGFR ≥90 mL/min/1.73 m <sup>2,7</sup> | Pulmonary<br><br>Genitourinary | Hospital admission with a principal discharge diagnosis of the relevant infection (ICD-9-CM codes) | Medical record review following patient report of hospital admission in cohort study | eGFR mL/min/1.73m <sup>2</sup> |                               |
|                                |             |                                      |                                                                                                                                   |                                                              |          |                     |                                                |                                |                                                                                                    |                                                                                      | ≥90                            | 1                             |
|                                |             |                                      |                                                                                                                                   |                                                              |          |                     |                                                |                                |                                                                                                    |                                                                                      | 60–89                          | 1.22 (0.99–1.54) <sup>8</sup> |
|                                |             |                                      |                                                                                                                                   |                                                              |          |                     |                                                |                                |                                                                                                    |                                                                                      | 45–59                          | 1.27 (0.94–1.71) <sup>8</sup> |
|                                |             |                                      |                                                                                                                                   |                                                              |          |                     |                                                |                                |                                                                                                    |                                                                                      | 15–44                          | 1.81 (1.25–2.63) <sup>8</sup> |
|                                |             |                                      |                                                                                                                                   |                                                              |          |                     |                                                |                                |                                                                                                    |                                                                                      | ≥90                            | 1                             |
|                                |             |                                      |                                                                                                                                   |                                                              |          |                     |                                                |                                |                                                                                                    |                                                                                      | 60–89                          | 1.08 (0.75–1.56) <sup>8</sup> |
|                                |             |                                      |                                                                                                                                   |                                                              |          |                     |                                                |                                |                                                                                                    |                                                                                      | 45–59                          | 1.17 (0.67–2.05) <sup>8</sup> |
|                                |             |                                      |                                                                                                                                   |                                                              |          |                     |                                                |                                |                                                                                                    |                                                                                      | 15–44                          | 2.63 (1.40–4.96) <sup>8</sup> |



|                                                  |                                          |                                     |                                                                                                        |                                                                          |          |                                                                                |                                                            |                                       |                                                                                                                       |                                      |                                                                                                                                                                                                                                                                                                                                                                                                                                                                                                                                                                                                                             |                                 |   |             |                                          |                                              |                                |         |                                          |                                |                                |         |                            |                                                  |  |          |                                        |
|--------------------------------------------------|------------------------------------------|-------------------------------------|--------------------------------------------------------------------------------------------------------|--------------------------------------------------------------------------|----------|--------------------------------------------------------------------------------|------------------------------------------------------------|---------------------------------------|-----------------------------------------------------------------------------------------------------------------------|--------------------------------------|-----------------------------------------------------------------------------------------------------------------------------------------------------------------------------------------------------------------------------------------------------------------------------------------------------------------------------------------------------------------------------------------------------------------------------------------------------------------------------------------------------------------------------------------------------------------------------------------------------------------------------|---------------------------------|---|-------------|------------------------------------------|----------------------------------------------|--------------------------------|---------|------------------------------------------|--------------------------------|--------------------------------|---------|----------------------------|--------------------------------------------------|--|----------|----------------------------------------|
|                                                  |                                          |                                     | 61% female                                                                                             |                                                                          |          |                                                                                |                                                            | Bacteremia and sepsis                 |                                                                                                                       |                                      | <table border="1"> <tr> <td>≥90</td> <td>1</td> </tr> <tr> <td>60–89</td> <td>1.10 (0.77–1.58)<sup>8</sup></td> </tr> <tr> <td>45–59</td> <td>1.55 (0.93–2.57)<sup>8</sup></td> </tr> <tr> <td>15–44</td> <td>0.77 (0.29–2.03)<sup>8</sup></td> </tr> </table>                                                                                                                                                                                                                                                                                                                                                              | ≥90                             | 1 | 60–89       | 1.10 (0.77–1.58) <sup>8</sup>            | 45–59                                        | 1.55 (0.93–2.57) <sup>8</sup>  | 15–44   | 0.77 (0.29–2.03) <sup>8</sup>            |                                |                                |         |                            |                                                  |  |          |                                        |
| ≥90                                              | 1                                        |                                     |                                                                                                        |                                                                          |          |                                                                                |                                                            |                                       |                                                                                                                       |                                      |                                                                                                                                                                                                                                                                                                                                                                                                                                                                                                                                                                                                                             |                                 |   |             |                                          |                                              |                                |         |                                          |                                |                                |         |                            |                                                  |  |          |                                        |
| 60–89                                            | 1.10 (0.77–1.58) <sup>8</sup>            |                                     |                                                                                                        |                                                                          |          |                                                                                |                                                            |                                       |                                                                                                                       |                                      |                                                                                                                                                                                                                                                                                                                                                                                                                                                                                                                                                                                                                             |                                 |   |             |                                          |                                              |                                |         |                                          |                                |                                |         |                            |                                                  |  |          |                                        |
| 45–59                                            | 1.55 (0.93–2.57) <sup>8</sup>            |                                     |                                                                                                        |                                                                          |          |                                                                                |                                                            |                                       |                                                                                                                       |                                      |                                                                                                                                                                                                                                                                                                                                                                                                                                                                                                                                                                                                                             |                                 |   |             |                                          |                                              |                                |         |                                          |                                |                                |         |                            |                                                  |  |          |                                        |
| 15–44                                            | 0.77 (0.29–2.03) <sup>8</sup>            |                                     |                                                                                                        |                                                                          |          |                                                                                |                                                            |                                       |                                                                                                                       |                                      |                                                                                                                                                                                                                                                                                                                                                                                                                                                                                                                                                                                                                             |                                 |   |             |                                          |                                              |                                |         |                                          |                                |                                |         |                            |                                                  |  |          |                                        |
| Hackam 2006 <sup>[24]</sup>                      | 1997 - 2002                              | Ontario Canada<br>Mean 2.2 years    | Patients with cardiovascular disease<br>n=69,168<br><br>>65 years<br>Mean 74.1 years<br><br>44% female | Chronic renal insufficiency<br>n=7,169                                   | Unclear  | Health record databases <sup>9</sup>                                           | No chronic renal insufficiency                             | Sepsis                                | Hospital admission with a diagnosis of sepsis <sup>10</sup>                                                           | Health record database <sup>11</sup> | 1.47 (1.27–1.72) <sup>12</sup>                                                                                                                                                                                                                                                                                                                                                                                                                                                                                                                                                                                              |                                 |   |             |                                          |                                              |                                |         |                                          |                                |                                |         |                            |                                                  |  |          |                                        |
| Karunajeewa 2005 <sup>[25]</sup>                 | 1999 - 2000                              | Western Australia<br>Mean 2.9 years | Patients with diabetes<br>n=496<br><br>>10 years<br>Mean 66.1 years <sup>13</sup><br><br>46.2% female  | Albuminuria; serum urea; serum creatinine                                | Unclear  | Baseline urinary albumin: creatinine ratio (ACR), serum urea, serum creatinine | Hazard ratio per 2.72-fold increase in ACR or serum urea   | Urinary sepsis and non-urinary sepsis | Hospitalisation diagnosis codes (principal diagnosis, or principal or secondary diagnosis) <sup>14</sup>              | Health record database <sup>15</sup> | <table border="1"> <tr> <td>Urinary sepsis (principal code)</td> <td></td> </tr> <tr> <td>Ln(ACR)</td> <td>1.5 (1.1 – 1.9)<sup>16</sup><br/>p=0.004</td> </tr> <tr> <td>Urinary sepsis (principal or secondary code)</td> <td></td> </tr> <tr> <td>Ln(ACR)</td> <td>1.3 (1.1 – 1.6)<sup>17</sup><br/>p=0.005</td> </tr> <tr> <td>Non-urinary sepsis (principal)</td> <td></td> </tr> <tr> <td>Ln(ACR)</td> <td>1.4(1.1-1.9)<sup>16</sup></td> </tr> <tr> <td>Non-urinary sepsis (principal or secondary code)</td> <td></td> </tr> <tr> <td>Ln(urea)</td> <td>4.6 (2.3-9.4)<sup>16</sup><br/>p&lt;0.001</td> </tr> </table> | Urinary sepsis (principal code) |   | Ln(ACR)     | 1.5 (1.1 – 1.9) <sup>16</sup><br>p=0.004 | Urinary sepsis (principal or secondary code) |                                | Ln(ACR) | 1.3 (1.1 – 1.6) <sup>17</sup><br>p=0.005 | Non-urinary sepsis (principal) |                                | Ln(ACR) | 1.4(1.1-1.9) <sup>16</sup> | Non-urinary sepsis (principal or secondary code) |  | Ln(urea) | 4.6 (2.3-9.4) <sup>16</sup><br>p<0.001 |
| Urinary sepsis (principal code)                  |                                          |                                     |                                                                                                        |                                                                          |          |                                                                                |                                                            |                                       |                                                                                                                       |                                      |                                                                                                                                                                                                                                                                                                                                                                                                                                                                                                                                                                                                                             |                                 |   |             |                                          |                                              |                                |         |                                          |                                |                                |         |                            |                                                  |  |          |                                        |
| Ln(ACR)                                          | 1.5 (1.1 – 1.9) <sup>16</sup><br>p=0.004 |                                     |                                                                                                        |                                                                          |          |                                                                                |                                                            |                                       |                                                                                                                       |                                      |                                                                                                                                                                                                                                                                                                                                                                                                                                                                                                                                                                                                                             |                                 |   |             |                                          |                                              |                                |         |                                          |                                |                                |         |                            |                                                  |  |          |                                        |
| Urinary sepsis (principal or secondary code)     |                                          |                                     |                                                                                                        |                                                                          |          |                                                                                |                                                            |                                       |                                                                                                                       |                                      |                                                                                                                                                                                                                                                                                                                                                                                                                                                                                                                                                                                                                             |                                 |   |             |                                          |                                              |                                |         |                                          |                                |                                |         |                            |                                                  |  |          |                                        |
| Ln(ACR)                                          | 1.3 (1.1 – 1.6) <sup>17</sup><br>p=0.005 |                                     |                                                                                                        |                                                                          |          |                                                                                |                                                            |                                       |                                                                                                                       |                                      |                                                                                                                                                                                                                                                                                                                                                                                                                                                                                                                                                                                                                             |                                 |   |             |                                          |                                              |                                |         |                                          |                                |                                |         |                            |                                                  |  |          |                                        |
| Non-urinary sepsis (principal)                   |                                          |                                     |                                                                                                        |                                                                          |          |                                                                                |                                                            |                                       |                                                                                                                       |                                      |                                                                                                                                                                                                                                                                                                                                                                                                                                                                                                                                                                                                                             |                                 |   |             |                                          |                                              |                                |         |                                          |                                |                                |         |                            |                                                  |  |          |                                        |
| Ln(ACR)                                          | 1.4(1.1-1.9) <sup>16</sup>               |                                     |                                                                                                        |                                                                          |          |                                                                                |                                                            |                                       |                                                                                                                       |                                      |                                                                                                                                                                                                                                                                                                                                                                                                                                                                                                                                                                                                                             |                                 |   |             |                                          |                                              |                                |         |                                          |                                |                                |         |                            |                                                  |  |          |                                        |
| Non-urinary sepsis (principal or secondary code) |                                          |                                     |                                                                                                        |                                                                          |          |                                                                                |                                                            |                                       |                                                                                                                       |                                      |                                                                                                                                                                                                                                                                                                                                                                                                                                                                                                                                                                                                                             |                                 |   |             |                                          |                                              |                                |         |                                          |                                |                                |         |                            |                                                  |  |          |                                        |
| Ln(urea)                                         | 4.6 (2.3-9.4) <sup>16</sup><br>p<0.001   |                                     |                                                                                                        |                                                                          |          |                                                                                |                                                            |                                       |                                                                                                                       |                                      |                                                                                                                                                                                                                                                                                                                                                                                                                                                                                                                                                                                                                             |                                 |   |             |                                          |                                              |                                |         |                                          |                                |                                |         |                            |                                                  |  |          |                                        |
| James 2008 <sup>[26]</sup>                       | 2001 - 2004                              | Calgary Canada<br>Mean 3.2 years    | General population<br>n=25,675<br><br>>65 years<br>Mean by eGFR <sup>18</sup><br><br>55.9% female      | Baseline eGFR<60 mL/min/1.73 m <sup>2</sup> <sup>19</sup><br><br>n=6,941 | Excluded | Calgary Laboratory Services records                                            | Baseline eGFR ≥60 mL/min/1.73 m <sup>2</sup> <sup>19</sup> | Bloodstream infection                 | Any pathogenic organism isolated from ≥1 blood cultures submitted from the community or ≤2 days of hospital admission | Calgary Laboratory Services records  | <table border="1"> <tr> <td>eGFR mL/min/1.73m<sup>2</sup></td> <td></td> </tr> <tr> <td>≥60</td> <td>1</td> </tr> <tr> <td>45-59</td> <td>1.17 (0.92–1.49)<sup>20</sup></td> </tr> <tr> <td>30-44</td> <td>1.60 (1.20–2.13)<sup>20</sup></td> </tr> <tr> <td>&lt;30</td> <td>2.95 (2.11–4.14)<sup>20</sup></td> </tr> </table>                                                                                                                                                                                                                                                                                              | eGFR mL/min/1.73m <sup>2</sup>  |   | ≥60         | 1                                        | 45-59                                        | 1.17 (0.92–1.49) <sup>20</sup> | 30-44   | 1.60 (1.20–2.13) <sup>20</sup>           | <30                            | 2.95 (2.11–4.14) <sup>20</sup> |         |                            |                                                  |  |          |                                        |
| eGFR mL/min/1.73m <sup>2</sup>                   |                                          |                                     |                                                                                                        |                                                                          |          |                                                                                |                                                            |                                       |                                                                                                                       |                                      |                                                                                                                                                                                                                                                                                                                                                                                                                                                                                                                                                                                                                             |                                 |   |             |                                          |                                              |                                |         |                                          |                                |                                |         |                            |                                                  |  |          |                                        |
| ≥60                                              | 1                                        |                                     |                                                                                                        |                                                                          |          |                                                                                |                                                            |                                       |                                                                                                                       |                                      |                                                                                                                                                                                                                                                                                                                                                                                                                                                                                                                                                                                                                             |                                 |   |             |                                          |                                              |                                |         |                                          |                                |                                |         |                            |                                                  |  |          |                                        |
| 45-59                                            | 1.17 (0.92–1.49) <sup>20</sup>           |                                     |                                                                                                        |                                                                          |          |                                                                                |                                                            |                                       |                                                                                                                       |                                      |                                                                                                                                                                                                                                                                                                                                                                                                                                                                                                                                                                                                                             |                                 |   |             |                                          |                                              |                                |         |                                          |                                |                                |         |                            |                                                  |  |          |                                        |
| 30-44                                            | 1.60 (1.20–2.13) <sup>20</sup>           |                                     |                                                                                                        |                                                                          |          |                                                                                |                                                            |                                       |                                                                                                                       |                                      |                                                                                                                                                                                                                                                                                                                                                                                                                                                                                                                                                                                                                             |                                 |   |             |                                          |                                              |                                |         |                                          |                                |                                |         |                            |                                                  |  |          |                                        |
| <30                                              | 2.95 (2.11–4.14) <sup>20</sup>           |                                     |                                                                                                        |                                                                          |          |                                                                                |                                                            |                                       |                                                                                                                       |                                      |                                                                                                                                                                                                                                                                                                                                                                                                                                                                                                                                                                                                                             |                                 |   |             |                                          |                                              |                                |         |                                          |                                |                                |         |                            |                                                  |  |          |                                        |
| James 2009 <sup>[27]</sup>                       | 2003 -                                   | Calgary Canada                      | General population                                                                                     | Time updated                                                             | Excluded | Calgary Laboratory                                                             | eGFR 60-104 mL/min/1.73                                    | Pneumonia                             | ICD-10 code for pneumonia any                                                                                         | Hospital discharge                   | <table border="1"> <tr> <td>eGFR mL/min/1.73m<sup>2</sup></td> <td></td> </tr> <tr> <td>18-54 years</td> <td></td> </tr> </table>                                                                                                                                                                                                                                                                                                                                                                                                                                                                                           | eGFR mL/min/1.73m <sup>2</sup>  |   | 18-54 years |                                          |                                              |                                |         |                                          |                                |                                |         |                            |                                                  |  |          |                                        |
| eGFR mL/min/1.73m <sup>2</sup>                   |                                          |                                     |                                                                                                        |                                                                          |          |                                                                                |                                                            |                                       |                                                                                                                       |                                      |                                                                                                                                                                                                                                                                                                                                                                                                                                                                                                                                                                                                                             |                                 |   |             |                                          |                                              |                                |         |                                          |                                |                                |         |                            |                                                  |  |          |                                        |
| 18-54 years                                      |                                          |                                     |                                                                                                        |                                                                          |          |                                                                                |                                                            |                                       |                                                                                                                       |                                      |                                                                                                                                                                                                                                                                                                                                                                                                                                                                                                                                                                                                                             |                                 |   |             |                                          |                                              |                                |         |                                          |                                |                                |         |                            |                                                  |  |          |                                        |

|                           |             |                                |                                                                                                                                                       |                                                                  |         |                           |                                                            |        |                                                                                                             |                                                                                |                                                                                                                                                                                                                                                                                                                                                                                                                                                                                                                                                                                                                                    |
|---------------------------|-------------|--------------------------------|-------------------------------------------------------------------------------------------------------------------------------------------------------|------------------------------------------------------------------|---------|---------------------------|------------------------------------------------------------|--------|-------------------------------------------------------------------------------------------------------------|--------------------------------------------------------------------------------|------------------------------------------------------------------------------------------------------------------------------------------------------------------------------------------------------------------------------------------------------------------------------------------------------------------------------------------------------------------------------------------------------------------------------------------------------------------------------------------------------------------------------------------------------------------------------------------------------------------------------------|
|                           | 2006        | Median 2.5 years               | n=252,516<br>≥18 years<br>Mean by eGFR <sup>21</sup><br><br>42.3% female                                                                              | eGFR<60 mL/min/1.73 m <sup>2</sup> <sup>22</sup><br><br>n=35,948 |         | Services records          | m <sup>2</sup> <sup>22</sup>                               |        | position in hospital discharge report                                                                       | reports                                                                        | 60-104   1<br>45-59   3.23 (2.40–4.36) <sup>23</sup><br>30-44   9.67 (6.36–14.69) <sup>23</sup><br><30   15.04 (9.64–23.47) <sup>23</sup><br>Age 55 – 64 years<br>60-104   1<br>45-59   1.43 (1.11–1.84) <sup>23</sup><br>30-44   1.94 (1.32–2.87) <sup>23</sup><br><30   5.50 (3.83–7.92) <sup>23</sup><br>Age 65 – 74 years<br>60-104   1<br>45-59   1.18 (0.99–1.40) <sup>23</sup><br>30-44   2.24 (1.84–2.73) <sup>23</sup><br><30   3.23 (2.52–4.13) <sup>23</sup><br>Age ≥75 years<br>60-104   1<br>45-59   0.95 (0.85–1.05) <sup>23</sup><br>30-44   1.03 (0.92–1.16) <sup>23</sup><br><30   1.79 (1.55–2.06) <sup>23</sup> |
| Wang 2012 <sup>[28]</sup> | 2003 – 2011 | United States<br>Mean .7 years | General population sample (weighted by age, geography and ethnicity) <sup>24</sup><br><br>n=30,239<br><br>≥45 years<br>69%>60 years<br><br>55% female | Baseline eGFR<60 mL/min/1.73 m <sup>2</sup> <sup>25</sup>        | Unclear | Baseline serum creatinine | Baseline eGFR ≥60 mL/min/1.73 m <sup>2</sup> <sup>25</sup> | Sepsis | Among hospitalisations attributed by participants to serious infection, medical record review <sup>26</sup> | Initially reported by study participants, confirmed with medical record review | 1.99 (1.73–2.29) <sup>27</sup>                                                                                                                                                                                                                                                                                                                                                                                                                                                                                                                                                                                                     |

|                                                             |                                  |                   |                                                       |                                                                                                         |                                                                |          |                                                                                                                                |                                                    |                                                         |                                                                                                                                     |                                                                                                                         |                                                                     |
|-------------------------------------------------------------|----------------------------------|-------------------|-------------------------------------------------------|---------------------------------------------------------------------------------------------------------|----------------------------------------------------------------|----------|--------------------------------------------------------------------------------------------------------------------------------|----------------------------------------------------|---------------------------------------------------------|-------------------------------------------------------------------------------------------------------------------------------------|-------------------------------------------------------------------------------------------------------------------------|---------------------------------------------------------------------|
| 1<br>2<br>3<br>4<br>5<br>6<br>7<br>8<br>9<br>10<br>11<br>12 | Caljouw<br>2011 <sup>[29]</sup>  | 1998<br>-<br>2004 | Leiden<br>The<br>Netherlands<br><br>Mean 2.6<br>years | General<br>population<br>n= 479<br><br>86-90 years<br>All aged 86<br>years at entry<br><br>67.2% female | Creatinine<br>clearance<br><30mL/min <sup>28</sup><br><br>n=43 | Unclear  | Baseline<br>serum<br>creatinine                                                                                                | Creatinine<br>clearance<br>≥30mL/min <sup>28</sup> | UTI                                                     | Diagnosed by<br>treating<br>physician based<br>on signs,<br>symptoms and<br>urine analysis;<br>or death<br>records <sup>29</sup>    | Physician<br>interview and<br>medical record<br>review.<br><br>Statistics<br>Netherlands for<br>cause of death<br>data. | 0.9 (0.5–1.7) (unadjusted)<br>p=0.794                               |
| 13<br>14<br>15<br>16<br>17<br>18<br>19<br>20<br>21<br>22    | Campbell<br>2011 <sup>[21]</sup> | 2009<br>-<br>2010 | England<br>UK<br><br>9 months                         | General<br>population<br>n=43.9 million<br><br>6 months - 64<br>years<br><br>Summary age<br>and sex n/r | Chronic<br>kidney<br>disease<br><br>n=182,000                  | Unclear  | Cases:<br>consultant<br>microbiologist<br>report.<br><br>Denominator:<br>primary care<br>population<br>estimate. <sup>30</sup> | No pre-<br>existing<br>conditions <sup>30</sup>    | Pandemic<br>influenza<br>A(H1N1)                        | Polymerase<br>chain reaction<br>(PCR) test<br>confirmation of<br>pandemic<br>influenza A<br>(H1N1) from a<br>hospital<br>inpatient. | Consultant<br>microbiologist<br>report to<br>national<br>surveillance<br>system.                                        | 17.5 (13.4 – 22.9) <sup>31</sup>                                    |
| 23<br>24<br>25<br>26<br>27<br>28<br>29<br>30<br>31          | USRDS<br>2010 <sup>[20]</sup>    | 2008              | USA<br><br>1 year <sup>32</sup>                       | Medicare<br>patients<br>66+ years                                                                       | Chronic<br>kidney<br>disease                                   | Excluded | Insurance<br>database ICD-<br>9_CM codes <sup>33</sup>                                                                         | No CKD                                             | Pneumonia<br><br>UTI<br><br>Bacteraemia/<br>septicaemia | Principal cause<br>of hospital<br>admission using<br>hospital<br>insurance claim<br>records                                         | ICD-9-CM codes<br>480-486<br><br>ICD-9-CM codes <sup>34</sup><br><br>ICD-9-CM codes<br>038.0 – 038.9                    | 2.76 (unadjusted)<br><br>3.15 (unadjusted)<br><br>3.90 (unadjusted) |

95% CI = 95% confidence interval; n/r = not reported; CKD= chronic kidney disease; UTI = urinary tract infection

1. Controls matched to cases on age at index data (within 1 year), sex, general practice, and calendar time. Estimate adjusted for smoking status, Townsend deprivation score, use of influenza vaccine in previous 12 months, use of pneumococcal vaccine in previous 5 years, number of years of medical records data available in database, and comorbidities including: diabetes, chronic heart disease, chronic respiratory disease, asplenia, cerebrospinal shunt, chronic liver disease, sickle cell disease or coeliac disease, cochlear implant, HIV/AIDS, immunosuppression, stroke or transient ischaemic attack, rheumatoid arthritis, Parkinson's disease, multiple sclerosis, dementia, osteoporosis, and any cancer.

2. Center for American Indian Health surveillance system.

3. Cases and controls matched by gender and age group. Adjusted for age, receipt of pneumococcal polysaccharide vaccine, congestive heart failure, alcohol use, body mass index and unemployment.
4. Adjusted for age, non-English language spoken most at home, living in detached house, living alone, congestive heart failure, chronic obstructive pulmonary disease, dysphagia, functional status using Barthel Index, immunosuppressive medications, nutritional score, tobacco use (lifetime history and secondhand smoke), alcohol consumption and history of regular exposure to gases, fumes or chemicals at home, or at work.
5. Approximate numbers, read from bar graph in publication. No confidence intervals available.
6. Cohort selected for the Cardiovascular Health Study. Exclusion criteria included: inability to provide informed consent or communicate with the interviewer, institutionalisation, being homebound, receipt of hospice care, treatment with radiation or chemotherapy for cancer, or plans to move out of the community within 3 years.
7. Serum cystatin C measured by particle-enhanced immunonephelometric assay, and eGFR calculated using:  $eGFR=6.7 \times CysC^{-1.19}$ .
8. Adjusted for age, sex, race, tobacco use, body mass index, diabetes mellitus, coronary heart disease, stroke, heart failure, cancer, chronic obstructive pulmonary disease, serum albumin, C-reactive protein, interleukin-6.
9. Canadian Institute for Health Information Discharge Abstract database or Ontario Health Insurance Plan database
10. ICD-9 codes 003 1, 036 2 and 038 0 – 038 9.
11. Canadian Institute for Health Information Discharge Abstract database.
12. Adjusted for statins, age, sex, nature of index event, charlson index, healthcare use, malignant disease, chemotherapy, neutropaenia, diabetes mellitus, oral steroids, antineoplastics, other immunosuppressants, history of aspiration, structural lung disease, previous infection (respiratory, GI, skin/soft tissue or other), recent trauma, transplant recipient, heart failure, stroke, chronic liver disease, chronic obstructive pulmonary disease, alcoholism, dementia, Parkinson's disease. Statin and non-statin users matched using propensity scoring for the above factors.
13. Mean age among the 460 participants without asymptomatic bacteriuria, 66.1years (SD11.0): mean age among the 36 participants with asymptomatic bacteriuria, 67.7 years (SD 10.5).
14. ICD-9 or ICD-10 codes for urinary sepsis were those encoding UTI, cystitis, pyelonephritis, orchitis, epididymitis and prostatitis; codes for non-urinary sepsis were those for sepsis, septicaemia and/or abscess.
15. Western Australia Data Linkage System.
16. Adjusted for presence of asymptomatic bacteriuria.
17. Adjusted for presence of asymptomatic bacteriuria and age.
18. Mean age  $\pm$ SD by eGFR.  $\geq 60$ : 74.4 $\pm$ 6.5years. 45-59: 77.5 $\pm$ 7.2 years. 30-44: 79.3 $\pm$ 7.4years.  $<30$ : 78.6 $\pm$ 7.4 years.
19. eGFR calculated using abbreviated Modification of Diet in Renal Disease Study equation (omitting ethnicity) from single outpatient serum creatinine result.
20. Adjusted for age, sex, diabetes mellitus, comorbidity score and care in a CKD clinic.
21. Mean age  $\pm$ SD by eGFR.  $\geq 105$ : 38.7 $\pm$ 14.6. 60-104: 50.9 $\pm$ 15.4. 45-59: 67.0 $\pm$  14.1. 30-44: 74.5 $\pm$ 12.9.  $<30$ : 73.3 $\pm$ 15.2.
22. eGFR calculated using abbreviated Modification of Diet in Renal Disease Study equation (omitting ethnicity) from most recent outpatient serum creatinine result.
23. Adjusted for age, sex, socio-economic status, ethnicity, diabetes mellitus, Charlson comorbidity score.
24. Cohort selected for the Reasons for Geographic and Racial Differences in Stroke (REGARDS) study. Population weighted by age, ethnicity and geography according to local stroke incidence rates.
25. eGFR calculated using CKD-EPI equation.

- 1  
2 26. Medical record review confirming (1) serious infection as major reason for admission and (2)  $\geq 2$  of heart rate  $>90$  beats/minute, temperature  $>38.3^{\circ}\text{C}$  or  $<36^{\circ}\text{C}$ , tachypnoea  
3  $>20$  breaths/minute or leucocytosis.  
4 27. Adjusted for age, sex, race, education, income, geographic region, alcohol use and smoking status. 28. Creatinine clearance calculated from serum creatinine concentration  
5 and weight using Cockcroft-Gault formula.  
6 29. Cause of death recorded as UTI (ICD-10 code N39.0)/  
7 30. Department of Health-Health Protection Agency influenza vaccine uptake primary care monitoring system data.  
8 31. Adjusted for age.  
9 32. Smoothed estimate: Models include data from the stated year and the two years preceding it, applying weights of 1,  $\frac{1}{4}$  and  $\frac{1}{8}$  with increasing distance in time.  
10 33. ICD-9-CM diagnosis codes recorded in insurance claims during the preceding year: 585.1 – 585.5 (chronic kidney disease stages 1-5); or 585.6 with no ESRD 2728 form  
11 or other indication of ESRD.  
12 34. Principal hospital admission ICD-9-CM codes: 590-590.9, 595-595.4, 597-597.89, 598, 599.0, 601-601.9, 604-604.9, 607.1-2, 608.0, 608.4, 616.1, 616.3-4, and 616.8.  
13  
14  
15  
16  
17  
18  
19  
20  
21  
22  
23  
24  
25  
26  
27  
28  
29  
30  
31  
32  
33  
34  
35  
36  
37  
38  
39  
40  
41  
42  
43  
44  
45  
46  
47  
48  
49

**Table 2: Summary of risk of bias within studies (quality assessment tool adapted from Higgins *et al.*)[14]**

|                                  | Selection bias:<br>control selection | Selection bias:<br>participation | Selection bias:<br>loss to follow up | Non-differential<br>misclassification:<br>Exposure | Information bias:<br>Exposure | Non-differential<br>misclassification:<br>Outcome | Information bias:<br>Outcome | Confounding | Reverse causation |
|----------------------------------|--------------------------------------|----------------------------------|--------------------------------------|----------------------------------------------------|-------------------------------|---------------------------------------------------|------------------------------|-------------|-------------------|
| <b>Case-control studies</b>      |                                      |                                  |                                      |                                                    |                               |                                                   |                              |             |                   |
| Vinogradova 2009 <sup>[16]</sup> |                                      |                                  | N/A                                  |                                                    |                               |                                                   |                              |             |                   |
| Watt 2007 <sup>[17]</sup>        |                                      |                                  | N/A                                  |                                                    |                               |                                                   |                              |             |                   |
| Loeb 2009 <sup>[18]</sup>        |                                      |                                  | N/A                                  |                                                    |                               |                                                   |                              |             |                   |
| Schnoor 2007 <sup>[19]</sup>     |                                      |                                  | N/A                                  |                                                    |                               |                                                   |                              |             |                   |
| <b>Cohort studies</b>            |                                      |                                  |                                      |                                                    |                               |                                                   |                              |             |                   |
| Higgins 1989 <sup>[22]</sup>     | N/A                                  | N/A                              |                                      |                                                    |                               |                                                   |                              |             |                   |
| Hackam 2006 <sup>[24]</sup>      | N/A                                  | N/A                              |                                      |                                                    |                               |                                                   |                              |             |                   |
| Dalrymple 2012 <sup>[23]</sup>   | N/A                                  | N/A                              |                                      |                                                    |                               |                                                   |                              |             |                   |
| Karunajeewa 2005 <sup>[25]</sup> | N/A                                  | N/A                              |                                      |                                                    |                               |                                                   |                              |             |                   |
| James 2008 <sup>[26]</sup>       | N/A                                  | N/A                              |                                      |                                                    |                               |                                                   |                              |             |                   |
| James 2009 <sup>[27]</sup>       | N/A                                  | N/A                              |                                      |                                                    |                               |                                                   |                              |             |                   |
| Wang 2012 <sup>[28]</sup>        | N/A                                  | N/A                              |                                      |                                                    |                               |                                                   |                              |             |                   |
| Caljouw 2011 <sup>[29]</sup>     | N/A                                  | N/A                              |                                      |                                                    |                               |                                                   |                              |             |                   |
| Campbell 2011 <sup>[21]</sup>    | N/A                                  | N/A                              |                                      |                                                    |                               |                                                   |                              |             |                   |
| USRDS 2010 <sup>[20]</sup>       | N/A                                  | N/A                              |                                      |                                                    |                               |                                                   |                              |             |                   |

**Key to table 2**

Low risk of bias

Uncertain risk of bias

High risk of bias



## DISCUSSION

Our comprehensive search strategy identified 14 studies describing an association between kidney disease and acute community-acquired infection. Although between-study heterogeneity precluded meta-analysis, all were consistent with a positive direction of association. The four studies which reported estimates on more than one category of kidney disease all found a graded association in which risk of infection increased with greater severity of CKD. These four studies all excluded patients with end-stage renal disease, and three were at low risk of bias in all categories of quality assessment.[22-23, 26-27]

To our knowledge, this is the first review to address this research question systematically. We used a sensitive search strategy, with a broad definition of kidney disease, for a thorough and inclusive search. The results are consistent with the conclusion of previous narrative reviews: that an association between CKD and infection incidence is likely, but that there is a paucity of evidence.[10-12]

Heterogeneity between the studies precluded meta-analysis of results. Variable study designs and biases may have contributed to heterogeneity: for example, the three case-control studies calculated odds ratios, which may differ from equivalent rate ratios for common infections.[16-18] Failure to control the confounding effects of age, sex and diabetes would be likely to result in overestimation of the effect of CKD on infection. Non-differential misclassification of kidney disease status in studies which relied on routine medical diagnosis would be expected to underestimate the effect of CKD on infection risk. In general the risk of ascertainment bias from increased monitoring for infection among patients with CKD is probably low, although one study assessed risk factors for hospitalisation with influenza during an influenza pandemic, in which context patients with influenza-like symptoms may have been more likely to be tested for influenza A(H1N1) if they also had CKD.[21]

1  
2  
3 The heterogeneity may reflect true differences in effect size between the studies.  
4  
5

6 Firstly, the studies considered a range of outcomes. CKD may have a different effect on the  
7  
8 incidence of different infections. For all but three studies, detection of infection required  
9  
10 either hospital attendance for the infection or a positive blood culture. CKD may affect  
11  
12 severity of infection, as an alternative or in addition to any effect on infection incidence.  
13  
14 CKD may also increase the probability of hospital admission for management of a  
15  
16 moderately severe infection. Either would result in a larger effect of CKD on the risk of  
17  
18 severe infectious outcomes (such as hospitalisation for sepsis) than on less severe infections  
19  
20 (such as community-diagnosed LRTI), and could result in the graded association we  
21  
22 observed, with increasing hospitalisation for patients with more severe stages of CKD.  
23  
24

25  
26  
27 Secondly, the studies included a variety of definitions of kidney disease. For example,  
28  
29 proteinuria (and renal loss of complement) may represent a separate mechanism for risk of  
30  
31 infection than uraemia. For the nine studies which did not exclude patients with ESRD it is  
32  
33 unclear to what extent the results reflect the effect of treatments associated with dialysis, such  
34  
35 as vascular or peritoneal access for dialysis, on infection incidence.  
36  
37

38  
39 Thirdly, the association of CKD with infection may be modified by age. James *et al.*  
40  
41 observed a weaker association of CKD with hospitalisation for pneumonia as age increased.  
42  
43 They suggested that such an observation could be explained by a lower baseline rate of  
44  
45 hospitalisation for pneumonia among younger adults, the natural decline in renal function by  
46  
47 age, and inaccuracy in the estimation of renal function using the Modification of Diet in  
48  
49 Renal Disease (MDRD) Study equation in older populations.[27] As their study population  
50  
51 included only adults who had had a creatinine test result, reasons for testing creatinine could  
52  
53 also be relevant confounders. As age-increases, more comorbidities accrue which require  
54  
55 creatinine tests to guide therapy. Hence, younger people who receive a creatinine test may be  
56  
57  
58  
59  
60



1  
2  
3 at an unusually high risk for both infections and CKD due to the reasons associated with  
4 getting a creatinine test. A real age-dependency of the CKD-infection association would be  
5 consistent with the lower effect of CKD on UTI incidence found among 86–90 year olds  
6 (0.90, 95% CI 0.50–1.77) compared with an adult study population with a mean age of 66  
7 years (1.50, 95% CI 1.10–1.90). However, it may be that the study among the older adults  
8 measured a less severe outcome, and CKD may be associated with other factors that  
9 eventually lead to hospitalisation for UTI.[25, 29]  
10  
11  
12  
13  
14  
15  
16  
17  
18

19 CKD was not a component of the primary study question for nine of the 14 studies, thus there  
20 is a risk that this association may have been reported and published only when CKD was  
21 found to be a risk factor for infection or an important confounder of another relationship. This  
22 would result in selective reporting bias, with a subsequent overestimation of the association  
23 of CKD with infection risk. This bias would be expected to affect smaller studies to a greater  
24 extent, and a funnel plot might show an asymmetry of relative risk estimates about the central  
25 pooled estimate among smaller studies. The sparsely populated funnel plot (**Fig S1**) provides  
26 no clear evidence for or against selective reporting bias, but some evidence of selective  
27 reporting bias comes from within the individual studies. For example, the crude hazard ratio  
28 for the association of creatinine clearance with UTI incidence is reported in Caljouw *et al.*  
29 (0.9, 95% CI 0.5–1.7) but as creatinine clearance was not found to be significant in the  
30 multivariable model the adjusted association is not reported.[29]  
31  
32  
33  
34  
35  
36  
37  
38  
39  
40  
41  
42  
43  
44  
45  
46

47 The overlap in the study populations of the two large cohort studies based in Calgary, Canada  
48 could result in more similar estimates than if the study populations were independent.[26-27]  
49

50 Outcomes in the two studies are likely to be correlated with each other: hospitalisation with  
51 pneumonia could cause a positive blood culture, which would result in one infection being  
52 included as an outcome in both studies. This is unlikely to have a large effect, particularly in  
53  
54  
55  
56  
57  
58  
59  
60

1  
2  
3 qualitative assessment of the combined evidence, as the potential overlap of person-time is  
4  
5 limited.  
6  
7

8  
9 Although we excluded study populations routinely treated with specialist medication (unless  
10 for kidney disease), some study populations may have been at higher risk of infection than  
11 the general population, and this may have affected the relationship of CKD to infection. For  
12 example, the cohort of patients admitted for an acute cardiovascular event or an arterial  
13 revascularisation procedure will have had a higher prevalence of co-morbidities (such as  
14 diabetes) than the general population and excluded patients with severe co-morbidities who  
15 did not survive an acute cardiovascular event, or who were not fit enough to undergo the  
16 procedure.[24] Each of the selected study populations limits the generalisability of the  
17 individual study result, but the qualitatively similar findings across the variety of study  
18 populations, and their qualitative consistency with the four studies based among the general  
19 population,[5, 16, 21, 29] support a positive association between CKD and infection risk in a  
20 variety of study populations.  
21  
22  
23  
24  
25  
26  
27  
28  
29  
30  
31  
32  
33  
34  
35

36 A few large, high quality studies which excluded patients with ESRD have found a graded  
37 association between pre-dialysis CKD and risk of hospitalisation with infection. All studies  
38 identified in this review were compatible with a positive association of CKD with increased  
39 infection risk. There are little data available on the association of CKD with infection  
40 incidence using less severe outcome measures than hospitalisation, and it is not possible in  
41 most studies to distinguish an effect on susceptibility to infection from an effect on the  
42 severity of infection.  
43  
44  
45  
46  
47  
48  
49  
50  
51

52 The potential age-dependency of the relationship between CKD and infection is intriguing  
53 and needs further research. There is also currently no evidence on the relationship between  
54 proteinuria and infection incidence independently of glomerular filtration rate. Future studies  
55  
56  
57  
58  
59  
60

1  
2  
3 should identify infections in the community in addition to hospitalisations for infection,  
4  
5 characterise the association of proteinuria adjusted for glomerular filtration rate, explore the  
6  
7 age-dependency of the association, and assess vaccine efficacy among older people with  
8  
9  
10 CKD.  
11  
12  
13  
14  
15  
16  
17  
18  
19  
20  
21  
22  
23  
24  
25  
26  
27  
28  
29  
30  
31  
32  
33  
34  
35  
36  
37  
38  
39  
40  
41  
42  
43  
44  
45  
46  
47  
48  
49  
50  
51  
52  
53  
54  
55  
56  
57  
58  
59  
60

For peer review only

## REFERENCES

1. Coresh J, Selvin E, Stevens LA, et al. Prevalence of chronic kidney disease in the United States. *JAMA*. 2007 Nov 7;298(17):2038-47.
2. Collins AJ, Foley R, Herzog C, et al. United States Renal Data System 2007 Annual Data Report Abstract. *Am J Kidney Dis*. 2008;51(1):A6-A7.
3. Sarnak MJ, Jaber BL. Mortality caused by sepsis in patients with end-stage renal disease compared with the general population. *Kidney Int*. 2000 Oct;58(4):1758-64.
4. Sarnak MJ, Jaber BL. Pulmonary infectious mortality among patients with end-stage renal disease. *Chest*. 2001 Dec;120(6):1883-7.
5. Morbidity and Mortality in Patients With Chronic Kidney Disease. *Am J Kidney Dis*. 2012;59(1):e59-e68.
6. Naqvi SB, Collins AJ. Infectious complications in chronic kidney disease. *Adv Chronic Kidney Dis*. 2006 Jul;13(3):199-204.
7. Viasus D, Garcia-Vidal C, Cruzado JM, et al. Epidemiology, clinical features and outcomes of pneumonia in patients with chronic kidney disease. *Nephrol Dial Transplant*. 2011 Sep;26(9):2899-906.
8. Kausz AT, Gilbertson DT. Overview of vaccination in chronic kidney disease. *Adv Chronic Kidney Dis*. 2006 Jul;13(3):209-14.
9. Allon M, Depner TA, Radeva M, et al. Impact of dialysis dose and membrane on infection-related hospitalization and death: results of the HEMO Study. *J Am Soc Nephrol*. 2003 Jul;14(7):1863-70.
10. Dalrymple LS, Go AS. Epidemiology of acute infections among patients with chronic kidney disease. *Clin J Am Soc Nephrol*. 2008 Sep;3(5):1487-93.
11. Foley RN. Infections in patients with chronic kidney disease. *Infect Dis Clin North Am*. 2007 Sep;21(3):659-72, viii.
12. Foley RN. Infections and cardiovascular disease in patients with chronic kidney disease. *Adv Chronic Kidney Dis*. 2006 Jul;13(3):205-8.
13. The World Bank. Country and lending groups. 2012 [6 June 2013]; Available from: <http://data.worldbank.org/about/country-classifications/country-and-lending-groups>.
14. Higgins JP, Altman DG, Gotzsche PC, et al. The Cochrane Collaboration's tool for assessing risk of bias in randomised trials. *BMJ*. 2011;343:d5928.
15. Higgins JP, Thompson SG, Deeks JJ, et al. Measuring inconsistency in meta-analyses. *BMJ*. 2003 Sep 6;327(7414):557-60.
16. Vinogradova Y, Hippisley-Cox J, Coupland C. Identification of new risk factors for pneumonia: population-based case-control study. *Br J Gen Pract*. 2009 Oct;59(567):e329-38.
17. Watt JP, O'Brien KL, Benin AL, et al. Risk factors for invasive pneumococcal disease among Navajo adults. *Am J Epidemiol*. 2007 Nov 1;166(9):1080-7.
18. Loeb M, Neupane B, Walter SD, et al. Environmental risk factors for community-acquired pneumonia hospitalization in older adults. *Journal of the American Geriatrics Society*. 2009 Jun;57(6):1036-40.
19. Schnoor M, Klante T, Beckmann M, et al. Risk factors for community-acquired pneumonia in German adults: the impact of children in the household. *Epidemiol Infect*. 2007 Nov;135(8):1389-97.
20. Collins AJ, Foley RN, Herzog C, et al. US Renal Data System 2010 Annual Data Report. *Am J Kidney Dis*. 2011 Jan;57(1 Suppl 1):A8, e1-526.
21. Campbell CNJ, Mytton OT, McLean EM, et al. Hospitalization in two waves of pandemic influenza A(H1N1) in England. *Epidemiology & Infection*. 2011 Oct;139(10):1560-9.
22. Higgins RM. Infections in a renal unit. *Q J Med*. 1989 Jan;70(261):41-51.
23. Dalrymple LS, Katz R, Kestenbaum B, et al. The risk of infection-related hospitalization with decreased kidney function. *Am J Kidney Dis*. 2012 Mar;59(3):356-63.

- 1  
2  
3 24. Hackam DG, Mamdani M, Li P, et al. Statins and sepsis in patients with cardiovascular  
4 disease: a population-based cohort analysis. *Lancet*. 2006 Feb 4;367(9508):413-8.  
5 25. Karunajeewa H, McGeachie D, Stuccio G, et al. Asymptomatic bacteriuria as a predictor of  
6 subsequent hospitalisation with urinary tract infection in diabetic adults: The Fremantle Diabetes  
7 Study. *Diabetologia*. 2005 Jul;48(7):1288-91.  
8 26. James MT, Laupland KB, Tonelli M, et al. Risk of bloodstream infection in patients with  
9 chronic kidney disease not treated with dialysis. *Arch Intern Med*. 2008 Nov 24;168(21):2333-9.  
10 27. James MT, Quan H, Tonelli M, et al. CKD and risk of hospitalization and death with  
11 pneumonia. *Am J Kidney Dis*. 2009 Jul;54(1):24-32.  
12 28. Wang HE, Shapiro NI, Griffin R, et al. Chronic medical conditions and risk of sepsis. *PLOS*  
13 *ONE*. 2012;7(10):e48307.  
14 29. Caljouw MA, den Elzen WP, Cools HJ, et al. Predictive factors of urinary tract infections  
15 among the oldest old in the general population. A population-based prospective follow-up study.  
16 *BMC Med*. 2011;9:57.  
17  
18  
19  
20  
21  
22  
23  
24  
25  
26  
27  
28  
29  
30  
31  
32  
33  
34  
35  
36  
37  
38  
39  
40  
41  
42  
43  
44  
45  
46  
47  
48  
49  
50  
51  
52  
53  
54  
55  
56  
57  
58  
59  
60

1  
2  
3 **FIGURE LEGENDS**  
4

5  
6 **Figure 1: Flow chart of study selection**  
7

8  
9 **Figure 2: Forest plot of all estimates of the association of CKD with infection(n=17)**  
10  
11 **from all 14 studies identified**  
12

13  
14 UTI: urinary tract infection

15 The estimates from Higgin 1985 and USRDS 2010 did not include standard errors.

16 Dalrymple 2012: Presented estimates compare eGFR 45-59 with eGFR  $\geq 90$   
17 mL/min/1.73m<sup>2</sup>

18 James 2009: Presented estimates compare eGFR 45-59 with eGFR 60-104  
19 mL/min/1.73m<sup>2</sup>

20 James 2008: Presented estimates compare estimated glomerular filtration rate (eGFR)  
21 45-59 with eGFR  $\geq 60$  mL/min/1.73m<sup>2</sup>  
22  
23  
24  
25  
26  
27  
28  
29  
30  
31  
32  
33  
34  
35  
36  
37  
38  
39  
40  
41  
42  
43  
44  
45  
46  
47  
48  
49  
50  
51  
52  
53  
54  
55  
56  
57  
58  
59  
60

**Contributor statement:**

All authors designed the study strategy including the search terms, inclusion and exclusion criteria. HM performed the search, study selection and data extraction. DN screened the randomly selected sample of 100 abstracts. All authors agreed quality assessment of included papers and interpretation of results by discussion. HM drafted the article, which DN and ST revised. All authors approved the final version of the manuscript.

**Competing interests statement:**

H I McDonald: None. S L Thomas: None. D Nitsch: None to declare.

**Funding statement:** This report is independent research arising from a Career Development Fellowship supported by the National Institute for Health Research, awarded to Dr Thomas (grant number CDF 2010-03-32). HM is funded by a Kidney Research UK studentship, grant reference ST2/2011. The views expressed in this publication are those of the authors and not necessarily those of the UK National Health Service, the National Institute for Health Research, the Department of Health, or Kidney Research UK. The funders of the study had no role in the study design, data collection, analysis or interpretation, decision to publish, or preparation of the manuscript.

**Data sharing statement:**

All data, including full search terms and eligibility criteria, are available either in the article or as online supplementary material submitted with this manuscript.

1  
2  
3  
4  
5  
6  
7  
8  
9  
10  
11  
12  
13  
14  
15  
16  
17  
18  
19  
20  
21  
22  
23  
24  
25  
26  
27  
28  
29  
30  
31  
32  
33  
34  
35  
36  
37  
38  
39  
40  
41  
42  
43  
44  
45  
46  
47  
48  
49  
50  
51  
52  
53  
54  
55  
56  
57  
58  
59  
60



90x85mm (300 x 300 DPI)

only



1  
2  
3  
4  
5  
6  
7  
8  
9  
10  
11  
12  
13  
14  
15  
16  
17  
18  
19  
20  
21  
22  
23  
24  
25  
26  
27  
28  
29  
30  
31  
32  
33  
34  
35  
36  
37  
38  
39  
40  
41  
42  
43  
44  
45  
46  
47  
48  
49  
50  
51  
52  
53  
54  
55  
56  
57  
58  
59  
60



90x75mm (300 x 300 DPI)

For peer review only

Supplementary Table 1: Medline search strategy

|    | Search                                                                                                                                                                                                                                                                                                                                                                                                                                                                                                                                                                                                                                                                                                                                                                                                                                                                                                                                                                                                                                                                                                                                                                                                                                    | Results |
|----|-------------------------------------------------------------------------------------------------------------------------------------------------------------------------------------------------------------------------------------------------------------------------------------------------------------------------------------------------------------------------------------------------------------------------------------------------------------------------------------------------------------------------------------------------------------------------------------------------------------------------------------------------------------------------------------------------------------------------------------------------------------------------------------------------------------------------------------------------------------------------------------------------------------------------------------------------------------------------------------------------------------------------------------------------------------------------------------------------------------------------------------------------------------------------------------------------------------------------------------------|---------|
| 1  | (sepsis* or septic?emia or bacter?emia or fung?emia or pneumonia* or bronchopneumonia* or pleuropneumonia* or LRTI or empy?ema or influenza* or legionell* or bacteriuri* or pyelonephriti* or cystitis* or pyelocystitis* or pyelitis* or urethriti* or UTI or meningiti* or meningococc* or encephaliti* or poliomyeliti* or septic shock).tw.                                                                                                                                                                                                                                                                                                                                                                                                                                                                                                                                                                                                                                                                                                                                                                                                                                                                                          | 343181  |
| 2  | (CNS adj4 infection*).tw.                                                                                                                                                                                                                                                                                                                                                                                                                                                                                                                                                                                                                                                                                                                                                                                                                                                                                                                                                                                                                                                                                                                                                                                                                 | 2545    |
| 3  | (central nervous adj4 infection*).tw.                                                                                                                                                                                                                                                                                                                                                                                                                                                                                                                                                                                                                                                                                                                                                                                                                                                                                                                                                                                                                                                                                                                                                                                                     | 3805    |
| 4  | exp cerebral phaeohyphomycosis/ or central nervous system infections/ or exp brain abscess/ or exp toxoplasmosis, cerebral/ or central nervous system bacterial infections/ or exp empyema, subdural/ or exp epidural abscess/ or exp lyme neuroborreliosis/ or exp meningitis, bacterial/ or exp meningitis, escherichia coli/ or exp meningitis, haemophilus/ or exp meningitis, listeria/ or exp meningitis, meningococcal/ or exp meningitis, pneumococcal/ or exp central nervous system fungal infections/ or exp meningitis, fungal/ or exp meningitis, cryptococcal/ or exp neuroaspergillosis/ or central nervous system viral diseases/ or exp encephalitis/ or exp encephalitis, viral/ or exp encephalitis, arbovirus/ or exp encephalitis, california/ or exp encephalitis, japanese/ or exp "encephalitis, st. louis"/ or exp encephalitis, tick-borne/ or exp west nile fever/ or exp encephalitis, herpes simplex/ or exp encephalitis, varicella zoster/ or exp encephalomyelitis, equine/ or exp meningitis, viral/ or exp lymphocytic choriomeningitis/ or exp meningitis, aseptic/ or exp paraparesis, tropical spastic/ or poliomyelitis/ or exp poliomyelitis, bulbar/ or exp encephalomyelitis/ or exp meningitis/ | 102876  |
| 5  | exp endocarditis, bacterial/ or exp endocarditis, subacute bacterial/ or exp pneumococcal infections/ or catheter-related infections/ or exp coinfection/ or communicable diseases/ or exp community-acquired infections/ or exp sepsis/ or exp bacteremia/ or exp hemorrhagic septicemia/ or exp fungemia/ or exp shock, septic/ or exp empyema/ or exp viremia/ or exp parasitemia/                                                                                                                                                                                                                                                                                                                                                                                                                                                                                                                                                                                                                                                                                                                                                                                                                                                     | 139752  |
| 6  | ((renal or kidney) adj4 chronic adj4 failure*).tw.                                                                                                                                                                                                                                                                                                                                                                                                                                                                                                                                                                                                                                                                                                                                                                                                                                                                                                                                                                                                                                                                                                                                                                                        | 21053   |
| 7  | ((renal or kidney) adj4 chronic adj4 disease*).tw.                                                                                                                                                                                                                                                                                                                                                                                                                                                                                                                                                                                                                                                                                                                                                                                                                                                                                                                                                                                                                                                                                                                                                                                        | 15978   |
| 8  | ((renal or kidney) adj4 chronic adj4 insufficienc*).tw.                                                                                                                                                                                                                                                                                                                                                                                                                                                                                                                                                                                                                                                                                                                                                                                                                                                                                                                                                                                                                                                                                                                                                                                   | 4448    |
| 9  | ((renal or kidney) adj4 chronic adj4 injury).tw.                                                                                                                                                                                                                                                                                                                                                                                                                                                                                                                                                                                                                                                                                                                                                                                                                                                                                                                                                                                                                                                                                                                                                                                          | 454     |
| 10 | ((renal or kidney) adj4 chronic adj4 impairment*).tw.                                                                                                                                                                                                                                                                                                                                                                                                                                                                                                                                                                                                                                                                                                                                                                                                                                                                                                                                                                                                                                                                                                                                                                                     | 336     |
| 11 | (creatinine* or GFR or eGFR or albuminuri* or proteinuri* or microalbuminuri* or                                                                                                                                                                                                                                                                                                                                                                                                                                                                                                                                                                                                                                                                                                                                                                                                                                                                                                                                                                                                                                                                                                                                                          | 194742  |

|    |    |                                                                                           |
|----|----|-------------------------------------------------------------------------------------------|
| 1  |    |                                                                                           |
| 2  |    |                                                                                           |
| 3  |    |                                                                                           |
| 4  |    | nephropath* or glomerulo* or nephro#ti* or nephrosi* or ur?emia or ESRD or CKD or         |
| 5  |    | cardio-renal or Kimmelstiel-Wilson).tw.                                                   |
| 6  |    |                                                                                           |
| 7  | 12 | Creatinine/bl [Blood] 25724                                                               |
| 8  |    |                                                                                           |
| 9  | 13 | Kidney Diseases/co, ep [Complications, Epidemiology] 11809                                |
| 10 |    |                                                                                           |
| 11 | 14 | exp diabetic nephropathies/ or exp hypertension, renal/ or exp nephritis/ or exp anti-    |
| 12 |    | glomerular basement membrane disease/ or exp glomerulonephritis, iga/ or exp              |
| 13 |    | glomerulonephritis, membranoproliferative/ or exp glomerulonephritis, membranous/         |
| 14 |    | or exp lupus nephritis/ or exp nephrosclerosis/ or exp nephrosis/ or exp renal            |
| 15 |    | insufficiency/ or exp cardio-renal syndrome/ or exp uremia/ or exp azotemia/ or exp       |
| 16 |    | proteinuria/ 234481                                                                       |
| 17 |    |                                                                                           |
| 18 |    |                                                                                           |
| 19 | 15 | kidney function tests/ or exp glomerular filtration rate/ 44837                           |
| 20 |    |                                                                                           |
| 21 | 16 | Animals/ 4889105                                                                          |
| 22 |    |                                                                                           |
| 23 | 17 | Humans/ 12139628                                                                          |
| 24 |    |                                                                                           |
| 25 | 18 | 16 not (16 and 17) 3594930                                                                |
| 26 |    |                                                                                           |
| 27 | 19 | Adult/ 3567838                                                                            |
| 28 |    |                                                                                           |
| 29 | 20 | exp child/ or exp child, preschool/ or exp infant/ 1849722                                |
| 30 |    |                                                                                           |
| 31 | 21 | 20 not (19 and 20) 1265383                                                                |
| 32 |    |                                                                                           |
| 33 | 22 | Case reports/ 1557478                                                                     |
| 34 |    |                                                                                           |
| 35 | 23 | developing countries/ or exp africa/ or cuba/ or dominica/ or dominican republic/ or      |
| 36 |    | grenada/ or guadeloupe/ or haiti/ or jamaica/ or exp central america/ or "gulf of         |
| 37 |    | mexico"/ or latin america/ or exp south america/ or exp asia, central/ or borneo/ or      |
| 38 |    | cambodia/ or east timor/ or indonesia/ or laos/ or malaysia/ or mekong valley/ or         |
| 39 |    | myanmar/ or philippines/ or thailand/ or vietnam/ or bangladesh/ or india/ or             |
| 40 |    | afghanistan/ or iran/ or iraq/ or jordan/ or lebanon/ or syria/ or turkey/ or yemen/ or   |
| 41 |    | nepal/ or pakistan/ or sri lanka/ or exp china/ or "democratic people's republic of       |
| 42 |    | korea"/ or mongolia/ or albania/ or latvia/ or lithuania/ or bosnia-herzegovina/ or       |
| 43 |    | bulgaria/ or "republic of belarus"/ or romania/ or exp russia/ or serbia/ or ukraine/ or  |
| 44 |    | yugoslavia/ or exp transcaucasia/ or exp indian ocean islands/ or fiji/ or papua new      |
| 45 |    | guinea/ or vanuatu/ or palau/ or hawaii/ 620630                                           |
| 46 |    |                                                                                           |
| 47 |    |                                                                                           |
| 48 | 24 | developed countries/ or bahamas/ or barbados/ or netherlands antilles/ or puerto rico/    |
| 49 |    | or "trinidad and tobago"/ or "virgin islands of the united states"/ or canada/ or         |
| 50 |    | greenland/ or united states/ or brunei/ or singapore/ or bahrain/ or israel/ or kuwait/   |
| 51 |    | or oman/ or qatar/ or saudi arabia/ or united arab emirates/ or hong kong/ or macau/      |
| 52 |    | or exp japan/ or "republic of korea"/ or bermuda/ or exp australia/ or andorra/ or        |
| 53 |    | austria/ or belgium/ or estonia/ or croatia/ or czech republic/ or hungary/ or poland/ or |
| 54 |    | 1800832                                                                                   |
| 55 |    |                                                                                           |
| 56 |    |                                                                                           |
| 57 |    |                                                                                           |
| 58 |    |                                                                                           |
| 59 |    |                                                                                           |
| 60 |    |                                                                                           |

|    |                                                                                                                                                                                                                                                                                                                                                                                                                                                                                                                                                                                                                                                                                                             |         |
|----|-------------------------------------------------------------------------------------------------------------------------------------------------------------------------------------------------------------------------------------------------------------------------------------------------------------------------------------------------------------------------------------------------------------------------------------------------------------------------------------------------------------------------------------------------------------------------------------------------------------------------------------------------------------------------------------------------------------|---------|
|    | slovakia/ or slovenia/ or finland/ or exp france/ or exp germany/ or gibraltar/ or exp<br>great britain/ or greece/ or iceland/ or ireland/ or exp italy/ or liechtenstein/ or<br>luxembourg/ or cyprus/ or malta/ or monaco/ or netherlands/ or portugal/ or san<br>marino/ or exp scandinavia/ or spain/ or switzerland/ or new zealand/ or new<br>caledonia/ or guam/                                                                                                                                                                                                                                                                                                                                    |         |
| 25 | 23 not (23 and 24)                                                                                                                                                                                                                                                                                                                                                                                                                                                                                                                                                                                                                                                                                          | 556094  |
| 26 | Postoperative complications.sh.                                                                                                                                                                                                                                                                                                                                                                                                                                                                                                                                                                                                                                                                             | 263650  |
| 27 | (incidence* or odds ratio or risk ratio or risk factor or relative risk).tw.                                                                                                                                                                                                                                                                                                                                                                                                                                                                                                                                                                                                                                | 608698  |
| 28 | (respiratory adj3 infection*).tw.                                                                                                                                                                                                                                                                                                                                                                                                                                                                                                                                                                                                                                                                           | 28563   |
| 29 | (lower respiratory adj3 infection*).tw.                                                                                                                                                                                                                                                                                                                                                                                                                                                                                                                                                                                                                                                                     | 4633    |
| 30 | (urinary adj3 infection*).tw.                                                                                                                                                                                                                                                                                                                                                                                                                                                                                                                                                                                                                                                                               | 28333   |
| 31 | (upper urinary adj3 infection*).tw.                                                                                                                                                                                                                                                                                                                                                                                                                                                                                                                                                                                                                                                                         | 312     |
| 32 | 6 or 7 or 8 or 9 or 10 or 11 or 12 or 13 or 14 or 15                                                                                                                                                                                                                                                                                                                                                                                                                                                                                                                                                                                                                                                        | 366856  |
| 33 | (exp incidence/ or exp multivariate analysis/ or exp odds ratio/ or exp logistic models/<br>or exp risk factors/ or exp epidemiologic studies/).sh.                                                                                                                                                                                                                                                                                                                                                                                                                                                                                                                                                         | 1799348 |
| 34 | (exp pyelitis/ or exp pyelocystitis/ or exp pyelonephritis/ or exp urethritis/ or cystitis or<br>urinary tract infections or exp pyuria/).sh.                                                                                                                                                                                                                                                                                                                                                                                                                                                                                                                                                               | 50526   |
| 35 | (respiratory tract infections or exp bronchiolitis/ or exp bronchiolitis, viral/ or<br>empyema, pleural or exp influenza, human/ or exp legionellosis/ or exp legionnaires'<br>disease/ or exp lung abscess/ or exp lung diseases, fungal/ or exp lung diseases,<br>parasitic/ or exp pneumonia/ or exp bronchopneumonia/ or exp pleuropneumonia/ or<br>exp pneumonia, bacterial/ or exp chlamydial pneumonia/ or exp pneumonia,<br>mycoplasma/ or exp pneumonia, pneumococcal/ or exp pneumonia, rickettsial/ or exp<br>pneumonia, staphylococcal/ or exp pneumonia, pneumocystis/ or exp pneumonia,<br>viral/ or exp severe acute respiratory syndrome/ or exp tracheitis/ or exp whooping<br>cough/).sh. | 155035  |
| 36 | 1 or 2 or 3 or 4 or 5 or 28 or 29 or 30 or 31 or 34 or 35                                                                                                                                                                                                                                                                                                                                                                                                                                                                                                                                                                                                                                                   | 585963  |
| 37 | 27 or 33                                                                                                                                                                                                                                                                                                                                                                                                                                                                                                                                                                                                                                                                                                    | 2098986 |
| 38 | 32 and 36 and 37                                                                                                                                                                                                                                                                                                                                                                                                                                                                                                                                                                                                                                                                                            | 5940    |
| 39 | 38 not 18 not 21 not 22 not 25 not 26                                                                                                                                                                                                                                                                                                                                                                                                                                                                                                                                                                                                                                                                       | 3514    |
| 40 | limit 39 to (english or french or german)                                                                                                                                                                                                                                                                                                                                                                                                                                                                                                                                                                                                                                                                   | 3163    |

Supplementary Table 2: Embase search strategy

|    | Search                                                                                                                                                            | Results |
|----|-------------------------------------------------------------------------------------------------------------------------------------------------------------------|---------|
| 1  | kidney failure/co, ep [Complication, Epidemiology]                                                                                                                | 13218   |
| 2  | chronic kidney failure/co, ep [Complication, Epidemiology]                                                                                                        | 10827   |
| 3  | exp proteinuria/co, ep [Complication, Epidemiology]                                                                                                               | 5456    |
| 4  | uremia/co, ep [Complication, Epidemiology]                                                                                                                        | 3030    |
| 5  | glomerulus filtration rate/                                                                                                                                       | 43185   |
| 6  | creatinine clearance/                                                                                                                                             | 17973   |
| 7  | glomerulosclerosis/co, ep [Complication, Epidemiology]                                                                                                            | 450     |
| 8  | kidney disease/co, ep [Complication, Epidemiology]                                                                                                                | 10406   |
| 9  | analgesic nephropathy/co, ep [Complication, Epidemiology]                                                                                                         | 39      |
| 10 | chronic kidney disease/co, ep [Complication, Epidemiology]                                                                                                        | 1733    |
| 11 | diabetic nephropathy/co, ep [Complication, Epidemiology]                                                                                                          | 9683    |
| 12 | allergic glomerulonephritis/co, ep [Complication, Epidemiology]                                                                                                   | 109     |
| 13 | immune complex nephritis/co, ep [Complication, Epidemiology]                                                                                                      | 77      |
| 14 | immunoglobulin A nephropathy/co, ep [Complication, Epidemiology]                                                                                                  | 678     |
| 15 | kidney amyloidosis/co, ep [Complication, Epidemiology]                                                                                                            | 228     |
| 16 | nephritis/co, ep [Complication, Epidemiology]                                                                                                                     | 1053    |
| 17 | glomerulitis/                                                                                                                                                     | 456     |
| 18 | Goodpasture syndrome/co, ep [Complication, Epidemiology]                                                                                                          | 31      |
| 19 | immune complex nephritis/co, ep [Complication, Epidemiology]                                                                                                      | 77      |
| 20 | interstitial nephritis/co, ep [Complication, Epidemiology]                                                                                                        | 901     |
| 21 | lupus erythematosus nephritis/co, ep [Complication, Epidemiology]                                                                                                 | 850     |
| 22 | nephrosis/co, ep [Complication, Epidemiology]                                                                                                                     | 189     |
| 23 | nephrotic syndrome/co, ep [Complication, Epidemiology]                                                                                                            | 2133    |
| 24 | exp glomerulopathy/co, ep [Complication, Epidemiology]                                                                                                            | 5475    |
| 25 | exp glomerulonephritis/co, ep [Complication, Epidemiology]                                                                                                        | 4296    |
| 26 | exp kidney dysfunction/co, ep [Complication, Epidemiology]                                                                                                        | 1322    |
| 27 | (creatinine* or GFR or eGFR or albuminuri* or proteinuri* or microalbuminuri* or nephropath* or glomerulo* or nephr#ti* or nephrosi* or ur?emia or ESRD or CKD or | 282722  |

|    |    |                                                                                                                                                                                                                                                                                                                            |
|----|----|----------------------------------------------------------------------------------------------------------------------------------------------------------------------------------------------------------------------------------------------------------------------------------------------------------------------------|
| 1  |    |                                                                                                                                                                                                                                                                                                                            |
| 2  |    |                                                                                                                                                                                                                                                                                                                            |
| 3  |    |                                                                                                                                                                                                                                                                                                                            |
| 4  |    |                                                                                                                                                                                                                                                                                                                            |
| 5  |    |                                                                                                                                                                                                                                                                                                                            |
| 6  | 28 | ((renal or kidney) adj4 chronic adj4 failure*).tw. 28639                                                                                                                                                                                                                                                                   |
| 7  | 29 | ((renal or kidney) adj4 chronic adj4 disease*).tw. 23893                                                                                                                                                                                                                                                                   |
| 8  |    |                                                                                                                                                                                                                                                                                                                            |
| 9  | 30 | ((renal or kidney) adj4 chronic adj4 insufficienc*).tw. 6425                                                                                                                                                                                                                                                               |
| 10 |    |                                                                                                                                                                                                                                                                                                                            |
| 11 | 31 | ((renal or kidney) adj4 chronic adj4 injury).tw. 631                                                                                                                                                                                                                                                                       |
| 12 |    |                                                                                                                                                                                                                                                                                                                            |
| 13 | 32 | ((renal or kidney) adj4 chronic adj4 impairment*).tw. 501                                                                                                                                                                                                                                                                  |
| 14 |    |                                                                                                                                                                                                                                                                                                                            |
| 15 | 33 | exp infectious pneumonia/ or bacterial pneumonia/ or chlamydial pneumonia/ or group b<br>streptococcal pneumonia/ or legionnaire disease/ or mycoplasma pneumonia/ or<br>pneumocystis pneumonia/ or pulmonary candidiasis/ or severe acute respiratory<br>syndrome/ or staphylococcal pneumonia/ or virus pneumonia/ 50671 |
| 16 |    |                                                                                                                                                                                                                                                                                                                            |
| 17 |    |                                                                                                                                                                                                                                                                                                                            |
| 18 |    |                                                                                                                                                                                                                                                                                                                            |
| 19 |    |                                                                                                                                                                                                                                                                                                                            |
| 20 |    |                                                                                                                                                                                                                                                                                                                            |
| 21 | 34 | respiratory tract infection/ or exp influenza/ or laryngotracheobronchitis/ or lower<br>respiratory tract infection/ or parainfluenza virus infection/ or respiratory syncytial virus<br>infection/ or viral respiratory tract infection/ 106624                                                                           |
| 22 |    |                                                                                                                                                                                                                                                                                                                            |
| 23 |    |                                                                                                                                                                                                                                                                                                                            |
| 24 |    |                                                                                                                                                                                                                                                                                                                            |
| 25 | 35 | avian influenza/ 5081                                                                                                                                                                                                                                                                                                      |
| 26 |    |                                                                                                                                                                                                                                                                                                                            |
| 27 | 36 | chest infection/ or pertussis/ 13997                                                                                                                                                                                                                                                                                       |
| 28 |    |                                                                                                                                                                                                                                                                                                                            |
| 29 | 37 | bronchiolitis/ or laryngotracheobronchitis/ or tracheobronchitis/ 10003                                                                                                                                                                                                                                                    |
| 30 |    |                                                                                                                                                                                                                                                                                                                            |
| 31 | 38 | pleura empyema/ 3703                                                                                                                                                                                                                                                                                                       |
| 32 |    |                                                                                                                                                                                                                                                                                                                            |
| 33 | 39 | pyuria/ or urinary tract infection/ 66023                                                                                                                                                                                                                                                                                  |
| 34 |    |                                                                                                                                                                                                                                                                                                                            |
| 35 | 40 | candiduria/ or kidney infection/ 1502                                                                                                                                                                                                                                                                                      |
| 36 |    |                                                                                                                                                                                                                                                                                                                            |
| 37 | 41 | kidney abscess/ or pyonephrosis/ 1666                                                                                                                                                                                                                                                                                      |
| 38 |    |                                                                                                                                                                                                                                                                                                                            |
| 39 | 42 | cystitis/ 11865                                                                                                                                                                                                                                                                                                            |
| 40 |    |                                                                                                                                                                                                                                                                                                                            |
| 41 | 43 | pyelonephritis/ or acute pyelonephritis/ 22138                                                                                                                                                                                                                                                                             |
| 42 |    |                                                                                                                                                                                                                                                                                                                            |
| 43 | 44 | brain infection/ or brain abscess/ or herpes simplex encephalitis/ or herpes zoster<br>encephalitis/ or subdural empyema/ or tick borne encephalitis/ or virus encephalitis/ 24862                                                                                                                                         |
| 44 |    |                                                                                                                                                                                                                                                                                                                            |
| 45 | 45 | central nervous system infection/ or epidural abscess/ or poliomyelitis/ 38386                                                                                                                                                                                                                                             |
| 46 |    |                                                                                                                                                                                                                                                                                                                            |
| 47 | 46 | meningitis/ or bacterial meningitis/ or exp fungal meningitis/ or haemophilus meningitis/<br>or lymphocytic choriomeningitis/ or subdural empyema/ or virus meningitis/ 57864                                                                                                                                              |
| 48 |    |                                                                                                                                                                                                                                                                                                                            |
| 49 |    |                                                                                                                                                                                                                                                                                                                            |
| 50 | 47 | encephalitis/ or brain ventriculitis/ or eastern equine encephalitis/ or encephalomyelitis/<br>or epidemic encephalitis/ or meningoencephalitis/ or panencephalitis/ or primary amebic<br>meningoencephalitis/ 47288                                                                                                       |
| 51 |    |                                                                                                                                                                                                                                                                                                                            |
| 52 |    |                                                                                                                                                                                                                                                                                                                            |
| 53 |    |                                                                                                                                                                                                                                                                                                                            |
| 54 |    |                                                                                                                                                                                                                                                                                                                            |
| 55 | 48 | exp meningococcosis/ 11231                                                                                                                                                                                                                                                                                                 |
| 56 |    |                                                                                                                                                                                                                                                                                                                            |
| 57 | 49 | exp pneumococcal infection/ 5729                                                                                                                                                                                                                                                                                           |
| 58 |    |                                                                                                                                                                                                                                                                                                                            |
| 59 |    |                                                                                                                                                                                                                                                                                                                            |
| 60 |    |                                                                                                                                                                                                                                                                                                                            |

|    |    |                                                                                         |
|----|----|-----------------------------------------------------------------------------------------|
| 1  |    |                                                                                         |
| 2  |    |                                                                                         |
| 3  | 50 | exp group b streptococcal infection/ or group b streptococcal pneumonia/                |
| 4  |    | 405                                                                                     |
| 5  | 51 | exp bacteremia/ or staphylococcal bacteremia/                                           |
| 6  |    | 29638                                                                                   |
| 7  | 52 | bloodstream infection/                                                                  |
| 8  |    | 2518                                                                                    |
| 9  | 53 | candidemia/                                                                             |
| 10 |    | 1358                                                                                    |
| 11 | 54 | systemic mycosis/ or fungemia/ or invasive aspergillosis/ or invasive candidiasis/      |
| 12 |    | 5182                                                                                    |
| 13 | 55 | sepsis/ or bacteremia/ or septic shock/ or septicemia/ or urosepsis/                    |
| 14 |    | 140091                                                                                  |
| 15 | 56 | viremia/                                                                                |
| 16 |    | 12287                                                                                   |
| 17 | 57 | parasitemia/                                                                            |
| 18 |    | 6918                                                                                    |
| 19 | 58 | (sepsis* or septic?emia or bacter?emia or fung?emia or pneumonia* or                    |
| 20 |    | bronchopneumonia* or pleuropneumonia* or LRTI or empy?ema or influenza* or              |
| 21 |    | legionell* or bacteriuri* or pyelonephritis or cystitis or pyelocystitis or pyelitis or |
| 22 |    | urethriti* or meningiti* or meningococc* or encephaliti* or poliomyeliti* or septic     |
| 23 |    | shock).tw.                                                                              |
| 24 |    | 497436                                                                                  |
| 25 | 59 | (CNS adj4 infection*).tw.                                                               |
| 26 |    | 3591                                                                                    |
| 27 | 60 | (central nervous adj4 infection*).tw.                                                   |
| 28 |    | 4861                                                                                    |
| 29 | 61 | UTI.tw.                                                                                 |
| 30 |    | 6684                                                                                    |
| 31 | 62 | bronchopneumonia/                                                                       |
| 32 |    | 8394                                                                                    |
| 33 | 63 | arachnoiditis/ or aseptic meningitis/ or epidemic meningitis/ or group b streptococcal  |
| 34 |    | meningitis/ or meningoenkephalitis/ or pneumococcal meningitis/                         |
| 35 |    | 21305                                                                                   |
| 36 | 64 | exp epidemiology/ or exp incidence/                                                     |
| 37 |    | 1705072                                                                                 |
| 38 | 65 | exp risk factor/                                                                        |
| 39 |    | 513022                                                                                  |
| 40 | 66 | exp attributable risk/                                                                  |
| 41 |    | 1487                                                                                    |
| 42 | 67 | exp hazard ratio/                                                                       |
| 43 |    | 11362                                                                                   |
| 44 | 68 | statistical model/                                                                      |
| 45 |    | 87903                                                                                   |
| 46 | 69 | (odds adj1 ratio).tw.                                                                   |
| 47 |    | 101865                                                                                  |
| 48 | 70 | (relative adj2 ratio).tw.                                                               |
| 49 |    | 2736                                                                                    |
| 50 | 71 | case report/                                                                            |
| 51 |    | 1892302                                                                                 |
| 52 | 72 | developing country/                                                                     |
| 53 |    | 71459                                                                                   |
| 54 | 73 | developed country/                                                                      |
| 55 |    | 25618                                                                                   |
| 56 | 74 | postoperative complication/ or postoperative infection/ or surgical infection/          |
| 57 |    | 272218                                                                                  |
| 58 | 75 | exp Africa/                                                                             |
| 59 |    | 196804                                                                                  |
| 60 |    |                                                                                         |

|    |    |                                                                                              |
|----|----|----------------------------------------------------------------------------------------------|
| 1  |    |                                                                                              |
| 2  |    |                                                                                              |
| 3  |    |                                                                                              |
| 4  | 76 | argentina/ or bolivia/ or brazil/ or chile/ or colombia/ or ecuador/ or french guiana/ or    |
| 5  |    | guyana/ or paraguay/ or peru/ or suriname/ or uruguay/ or venezuela/                         |
| 6  |    | 98392                                                                                        |
| 7  | 77 | exp Central America/                                                                         |
| 8  |    | 15618                                                                                        |
| 9  | 78 | china/ or mongolia/ or philippines/                                                          |
| 10 |    | 82530                                                                                        |
| 11 | 79 | borneo/ or cambodia/ or indonesia/ or laos/ or malaysia/ or myanmar/ or papua new            |
| 12 |    | guinea/ or thailand/ or timor-leste/ or viet nam/                                            |
| 13 |    | 53670                                                                                        |
| 14 | 80 | North Korea/                                                                                 |
| 15 |    | 237                                                                                          |
| 16 | 81 | latvia/ or lithuania/                                                                        |
| 17 |    | 3316                                                                                         |
| 18 | 82 | albania/ or armenia/ or azerbaijan/ or belarus/ or "bosnia and herzegovina"/ or bulgaria/    |
| 19 |    | or "georgia (republic)"/ or "macedonia (republic)"/ or romania/ or russian federation/ or    |
| 20 |    | serbia/ or ukraine/                                                                          |
| 21 |    | 83374                                                                                        |
| 22 | 83 | USSR/                                                                                        |
| 23 |    | 50149                                                                                        |
| 24 | 84 | iran/ or iraq/ or jordan/ or lebanon/ or "turkey (republic)"/ or yemen/                      |
| 25 |    | 49920                                                                                        |
| 26 | 85 | kazakhstan/ or kyrgyzstan/ or tajikistan/ or turkmenistan/ or uzbekistan/                    |
| 27 |    | 5682                                                                                         |
| 28 | 86 | afghanistan/ or bangladesh/ or india/ or nepal/ or pakistan/ or sikkim/ or sri lanka/        |
| 29 |    | 105351                                                                                       |
| 30 | 87 | cuba/ or dominica/ or dominican republic/ or grenada/ or guadeloupe/ or haiti/ or            |
| 31 |    | jamaica/                                                                                     |
| 32 |    | 11346                                                                                        |
| 33 | 88 | fiji/ or philippines/ or polynesia/                                                          |
| 34 |    | 8607                                                                                         |
| 35 | 89 | exp Indian Ocean/                                                                            |
| 36 |    | 2505                                                                                         |
| 37 | 90 | Mexico/                                                                                      |
| 38 |    | 28748                                                                                        |
| 39 | 91 | 72 or 75 or 76 or 77 or 78 or 79 or 80 or 81 or 82 or 83 or 84 or 85 or 86 or 87 or 88 or 89 |
| 40 |    | or 90                                                                                        |
| 41 |    | 789122                                                                                       |
| 42 | 92 | exp Western Europe/                                                                          |
| 43 |    | 911511                                                                                       |
| 44 | 93 | croatia/ or czech republic/ or hungary/ or poland/ or slovakia/ or slovenia/                 |
| 45 |    | 73494                                                                                        |
| 46 | 94 | Estonia/                                                                                     |
| 47 |    | 2056                                                                                         |
| 48 | 95 | canada/ or united states/                                                                    |
| 49 |    | 1031054                                                                                      |
| 50 | 96 | japan/ or macao/                                                                             |
| 51 |    | 115065                                                                                       |
| 52 | 97 | South Korea/                                                                                 |
| 53 |    | 4982                                                                                         |
| 54 | 98 | bahrain/ or cyprus/ or israel/ or kuwait/ or oman/ or qatar/ or saudi arabia/ or united      |
| 55 |    | arab emirates/                                                                               |
| 56 |    | 37707                                                                                        |
| 57 | 99 | exp "Australia and New Zealand"/                                                             |
| 58 |    | 129186                                                                                       |
| 59 |    |                                                                                              |
| 60 |    |                                                                                              |



|    |     |                                                                                                        |
|----|-----|--------------------------------------------------------------------------------------------------------|
| 1  |     |                                                                                                        |
| 2  |     |                                                                                                        |
| 3  |     |                                                                                                        |
| 4  | 100 | brunei darussalam/ or hong kong/ or singapore/ 21427                                                   |
| 5  | 101 | 73 or 92 or 93 or 94 or 95 or 96 or 97 or 98 or 99 or 100 2259038                                      |
| 6  |     |                                                                                                        |
| 7  | 102 | 91 not (91 and 101) 710496                                                                             |
| 8  |     |                                                                                                        |
| 9  | 103 | treatment outcome/ 579285                                                                              |
| 10 |     |                                                                                                        |
| 11 | 104 | editorial/ 438527                                                                                      |
| 12 |     |                                                                                                        |
| 13 | 105 | embryo/ 177038                                                                                         |
| 14 | 106 | infant/ 533322                                                                                         |
| 15 |     |                                                                                                        |
| 16 | 107 | child/ 1295310                                                                                         |
| 17 |     |                                                                                                        |
| 18 | 108 | preschool child/ 469034                                                                                |
| 19 |     |                                                                                                        |
| 20 | 109 | school child/ 217344                                                                                   |
| 21 |     |                                                                                                        |
| 22 | 110 | adolescent/ 1180705                                                                                    |
| 23 |     |                                                                                                        |
| 24 | 111 | adult/ 4186945                                                                                         |
| 25 |     |                                                                                                        |
| 26 | 112 | 105 or 106 or 107 or 108 or 109 or 110 2546570                                                         |
| 27 |     |                                                                                                        |
| 28 | 113 | 112 not (112 and 111) 1658687                                                                          |
| 29 |     |                                                                                                        |
| 30 | 114 | animal model/ 630310                                                                                   |
| 31 |     |                                                                                                        |
| 32 | 115 | animal experiment/ 1606715                                                                             |
| 33 |     |                                                                                                        |
| 34 | 116 | nonhuman/ 3807183                                                                                      |
| 35 |     |                                                                                                        |
| 36 | 117 | animal/ 1773703                                                                                        |
| 37 |     |                                                                                                        |
| 38 | 118 | human/ 13422168                                                                                        |
| 39 |     |                                                                                                        |
| 40 | 119 | 114 or 115 or 116 or 117 5921124                                                                       |
| 41 |     |                                                                                                        |
| 42 | 120 | 119 not (119 and 118) 4747089                                                                          |
| 43 |     |                                                                                                        |
| 44 | 121 | pneumonia/ 97950                                                                                       |
| 45 |     |                                                                                                        |
| 46 | 122 | lung infection/ or hantavirus pulmonary syndrome/ or lung abscess/ or viral bronchiolitis/ 21795       |
| 47 |     |                                                                                                        |
| 48 | 123 | (respiratory adj3 infection*).tw. 43371                                                                |
| 49 |     |                                                                                                        |
| 50 | 124 | (lower respiratory adj3 infection*).tw. 6553                                                           |
| 51 |     |                                                                                                        |
| 52 | 125 | (urinary adj3 infection*).tw. 44177                                                                    |
| 53 |     |                                                                                                        |
| 54 | 126 | (upper urinary adj3 infection*).tw. 444                                                                |
| 55 |     |                                                                                                        |
| 56 | 127 | (epidemiolog\$ or incidence).tw. 878025                                                                |
| 57 |     |                                                                                                        |
| 58 | 128 | (relative adj risk*).tw. 55195                                                                         |
| 59 |     |                                                                                                        |
| 60 | 129 | 1 or 2 or 3 or 4 or 5 or 6 or 7 or 8 or 9 or 10 or 11 or 12 or 13 or 14 or 15 or 16 or 17 or 18 364340 |

|            |                                                                                                                                                                                                                                        |         |
|------------|----------------------------------------------------------------------------------------------------------------------------------------------------------------------------------------------------------------------------------------|---------|
|            | or 19 or 20 or 21 or 22 or 23 or 24 or 25 or 26 or 27 or 28 or 29 or 30 or 31 or 32                                                                                                                                                    |         |
| <b>130</b> | 33 or 34 or 35 or 36 or 37 or 38 or 39 or 40 or 41 or 42 or 43 or 44 or 45 or 46 or 47 or 48<br>or 49 or 50 or 51 or 52 or 53 or 54 or 55 or 56 or 57 or 58 or 59 or 60 or 61 or 62 or 63 or<br>121 or 122 or 123 or 124 or 125 or 126 | 851259  |
| <b>131</b> | 64 or 65 or 66 or 67 or 68 or 69 or 70 or 127 or 128                                                                                                                                                                                   | 2659100 |
| <b>132</b> | 129 and 130 and 131                                                                                                                                                                                                                    | 7357    |
| <b>133</b> | 132 not 120 not 113 not 104 not 71 not 74 not 102                                                                                                                                                                                      | 4970    |
| <b>134</b> | limit 133 to (english or french or german)                                                                                                                                                                                             | 4602    |
| <b>135</b> | limit 134 to embase                                                                                                                                                                                                                    | 4247    |

Supplementary Table 3: Cochrane library search strategy

|   | Search                                                                                                                                                                                                                                                                                                                                                                                                                                                                                                                                                                                                                                                                                                                                                                                                                                                                                                                                                                                                                                                                                                                                                                                                                                                                                                                        | Results |
|---|-------------------------------------------------------------------------------------------------------------------------------------------------------------------------------------------------------------------------------------------------------------------------------------------------------------------------------------------------------------------------------------------------------------------------------------------------------------------------------------------------------------------------------------------------------------------------------------------------------------------------------------------------------------------------------------------------------------------------------------------------------------------------------------------------------------------------------------------------------------------------------------------------------------------------------------------------------------------------------------------------------------------------------------------------------------------------------------------------------------------------------------------------------------------------------------------------------------------------------------------------------------------------------------------------------------------------------|---------|
| 1 | sepsis* or septic*mia or bacter*mia or fung*mia or pneumonia* or bronchopneumonia* or pleuropneumonia* or LRTI or empy*ma or influenza* or legionell* or bacteriuri* or pyelonephriti* or cystitis* or pyelocystitis* or pyelitis* or urethriti* or UTI or meningiti* or meningococc* or encephaliti* or poliomyeliti* or "septic shock"                                                                                                                                                                                                                                                                                                                                                                                                                                                                                                                                                                                                                                                                                                                                                                                                                                                                                                                                                                                      | 19098   |
| 2 | CNS near/4 infection*                                                                                                                                                                                                                                                                                                                                                                                                                                                                                                                                                                                                                                                                                                                                                                                                                                                                                                                                                                                                                                                                                                                                                                                                                                                                                                         | 47      |
| 3 | "central nervous" near/4 infection*                                                                                                                                                                                                                                                                                                                                                                                                                                                                                                                                                                                                                                                                                                                                                                                                                                                                                                                                                                                                                                                                                                                                                                                                                                                                                           | 92      |
| 4 | [mh "cerebral phaeohyphomycosis"] or [mh ^"central nervous system infections"] or [mh "brain abscess"] or [mh "toxoplasmosis, cerebral"] or [mh ^"central nervous system bacterial infections"] or [mh "empyema, subdural"] or [mh "epidural abscess"] or [mh "lyme neuroborreliosis"] or [mh "meningitis, bacterial"] or [mh "meningitis, escherichia coli"] or [mh "meningitis, haemophilus"] or [mh "meningitis, listeria"] or [mh "meningitis, meningococcal"] or [mh "meningitis, pneumococcal"] or [mh "central nervous system fungal infections"] or [mh "meningitis, fungal"] or [mh "meningitis, cryptococcal"] or [mh neuroaspergillosis] or [mh ^"central nervous system viral diseases"] or [mh encephalitis] or [mh "encephalitis, viral"] or [mh "encephalitis, arbovirus"] or [mh "encephalitis, california"] or [mh "encephalitis, japanese"] or [mh "encephalitis, st. louis"] or [mh "encephalitis, tick-borne"] or [mh "west nile fever"] or [mh "encephalitis, herpes simplex"] or [mh "encephalitis, varicella zoster"] or [mh "encephalomyelitis, equine"] or [mh "meningitis, viral"] or [mh "lymphocytic choriomeningitis"] or [mh "meningitis, aseptic"] or [mh "paraparesis, tropical spastic"] or [mh ^poliomyelitis] or [mh "poliomyelitis, bulbar"] or [mh encephalomyelitis] or [mh meningitis] | 1015    |
| 5 | [mh "endocarditis, bacterial"] or [mh "endocarditis, subacute bacterial"] or [mh "pneumococcal infections"] or [mh ^"catheter-related infections"] or [mh coinfection] or [mh ^"communicable diseases"] or [mh "community-acquired infections"] or [mh sepsis] or [mh bacteremia] or [mh "hemorrhagic septicemia"] or [mh fungemia] or [mh "shock, septic"] or [mh empyema] or [mh viremia] or [mh parasitemia]                                                                                                                                                                                                                                                                                                                                                                                                                                                                                                                                                                                                                                                                                                                                                                                                                                                                                                               | 4033    |
| 6 | respiratory near/3 infection*                                                                                                                                                                                                                                                                                                                                                                                                                                                                                                                                                                                                                                                                                                                                                                                                                                                                                                                                                                                                                                                                                                                                                                                                                                                                                                 | 4398    |
| 7 | urinary near/3 infection*                                                                                                                                                                                                                                                                                                                                                                                                                                                                                                                                                                                                                                                                                                                                                                                                                                                                                                                                                                                                                                                                                                                                                                                                                                                                                                     | 3732    |
| 8 | [mh pyelitis] or [mh pyelocystitis] or [mh pyelonephritis] or [mh urethritis] or [mh ^cystitis] or [mh ^"urinary tract infections"] or [mh pyuria]                                                                                                                                                                                                                                                                                                                                                                                                                                                                                                                                                                                                                                                                                                                                                                                                                                                                                                                                                                                                                                                                                                                                                                            | 2143    |
| 9 | [mh ^"respiratory tract infections"] or [mh bronchiolitis] or [mh "bronchiolitis, viral"] or [mh ^"empyema, pleural"] or [mh "influenza, human"] or [mh legionellosis] or [mh                                                                                                                                                                                                                                                                                                                                                                                                                                                                                                                                                                                                                                                                                                                                                                                                                                                                                                                                                                                                                                                                                                                                                 | 5402    |

|    |    |                                                                                             |
|----|----|---------------------------------------------------------------------------------------------|
| 1  |    |                                                                                             |
| 2  |    |                                                                                             |
| 3  |    |                                                                                             |
| 4  |    |                                                                                             |
| 5  |    |                                                                                             |
| 6  |    |                                                                                             |
| 7  |    |                                                                                             |
| 8  |    |                                                                                             |
| 9  |    |                                                                                             |
| 10 |    |                                                                                             |
| 11 |    |                                                                                             |
| 12 |    |                                                                                             |
| 13 |    |                                                                                             |
| 14 | 10 | (renal or kidney) near/4 chronic near/4 failure* 4476                                       |
| 15 | 11 | (renal or kidney) near/4 chronic near/4 disease* 1647                                       |
| 16 | 12 | (renal or kidney) near/4 chronic near/4 insufficienc* 510                                   |
| 17 | 13 | (renal or kidney) near/4 chronic near/4 injury 29                                           |
| 18 | 14 | (renal or kidney) near/4 chronic near/4 impairment* 34                                      |
| 19 | 15 | creatinine* or GFR or eGFR or albuminuri* or proteinuri* or microalbuminuri* or 16810       |
| 20 |    | nephropath* or glomerulo* or nephro?ti* or nephrosi* or ur*mia or ESRD or CKD or            |
| 21 |    | cardio-renal or Kimmelstiel-Wilson                                                          |
| 22 | 16 | [mh ^creatinine/BL] 2042                                                                    |
| 23 | 17 | [mh ^"kidney diseases"/CO,EP] 341                                                           |
| 24 | 18 | [mh "diabetic nephropathies"] or [mh "hypertension, renal"] or [mh nephritis] or [mh 7117   |
| 25 |    | "anti-glomerular basement membrane disease"] or [mh "glomerulonephritis, iga"] or [mh       |
| 26 |    | "glomerulonephritis, membranoproliferative"] or [mh "glomerulonephritis,                    |
| 27 |    | membranous"] or [mh "lupus nephritis"] or [mh nephrosclerosis] or [mh nephrosis] or         |
| 28 |    | [mh "renal insufficiency"] or [mh "cardio-renal syndrome"] or [mh uremia] or [mh            |
| 29 |    | azotemia] or [mh proteinuria]                                                               |
| 30 | 19 | [mh ^"kidney function tests"] or [mh "glomerular filtration rate"] 2417                     |
| 31 | 20 | {or #1-#9} 25511                                                                            |
| 32 | 21 | {or #10-#19} 21120                                                                          |
| 33 | 22 | {and #20-#21} 1422                                                                          |
| 34 | 23 | incidence* or "odds ratio" or "risk ratio" or "risk factor" or "relative risk" 69239        |
| 35 | 24 | [mh incidence] or [mh "multivariate analysis"] or [mh "odds ratio"] or [mh "logistic 122866 |
| 36 |    | models"] or [mh "risk factors"] or [mh "epidemiologic studies"]                             |
| 37 | 25 | {or #23-#24} 165844                                                                         |
| 38 | 26 | {and #22, #25} 953                                                                          |
| 39 |    |                                                                                             |
| 40 |    |                                                                                             |
| 41 |    |                                                                                             |
| 42 |    |                                                                                             |
| 43 |    |                                                                                             |
| 44 |    |                                                                                             |
| 45 |    |                                                                                             |
| 46 |    |                                                                                             |
| 47 |    |                                                                                             |
| 48 |    |                                                                                             |
| 49 |    |                                                                                             |
| 50 |    |                                                                                             |
| 51 |    |                                                                                             |
| 52 |    |                                                                                             |
| 53 |    |                                                                                             |
| 54 |    |                                                                                             |
| 55 |    |                                                                                             |
| 56 |    |                                                                                             |
| 57 |    |                                                                                             |
| 58 |    |                                                                                             |
| 59 |    |                                                                                             |
| 60 |    |                                                                                             |

**Supplementary Table 4:** Inclusion and exclusion criteria for determining study eligibility

|                             | Included                                                                                                                                                                                                                                                                                                                                                                                                                                                                                                           | Excluded                                                                                                                                                                                                                                                                                                                                                 |
|-----------------------------|--------------------------------------------------------------------------------------------------------------------------------------------------------------------------------------------------------------------------------------------------------------------------------------------------------------------------------------------------------------------------------------------------------------------------------------------------------------------------------------------------------------------|----------------------------------------------------------------------------------------------------------------------------------------------------------------------------------------------------------------------------------------------------------------------------------------------------------------------------------------------------------|
| <b>Participants</b>         | Adult human participants.                                                                                                                                                                                                                                                                                                                                                                                                                                                                                          | Populations exclusively of: <ul style="list-style-type: none"> <li>- pregnant women;</li> <li>- kidney transplant recipients or patients receiving renal replacement therapy;</li> <li>- patient groups usually managed in secondary care unless this was for chronic kidney disease, or routinely treated with immunosuppressive medication.</li> </ul> |
| <b>Study settings</b>       | High income countries (World Bank classification).(13)<br>Community settings, including adults living in institutional care.                                                                                                                                                                                                                                                                                                                                                                                       |                                                                                                                                                                                                                                                                                                                                                          |
| <b>Exposure of interest</b> | Chronic acquired kidney disease, indicated by any of the following: <ul style="list-style-type: none"> <li>- medical diagnosis;</li> <li>- reduced estimated glomerular filtration rate;</li> <li>- reduced creatinine clearance;</li> <li>- elevated creatinine;</li> <li>- proteinuria, micro- or macro-albuminuria;</li> <li>- renal structural abnormalities.</li> </ul> <p>Where there was no 'unexposed' group without kidney disease, comparison between stages 1-2 and stages 3-5 CKD was accepted.</p>    |                                                                                                                                                                                                                                                                                                                                                          |
| <b>Outcomes of interest</b> | Incidence rate ratio, risk ratio or odds ratio estimates of the effect of kidney disease on any of the following community-acquired acute infections: <ul style="list-style-type: none"> <li>- lower respiratory tract infections;</li> <li>- urinary tract infections (UTIs);</li> <li>- central nervous system infections;</li> <li>- sepsis.</li> </ul> <p>Urinary catheter-associated UTIs from community settings, and incidence of severe disease (such as hospitalisation for infection) were accepted.</p> | Outcomes not accepted: <ul style="list-style-type: none"> <li>- infection prevalence;</li> <li>- hospital-associated infection rates;</li> <li>- post-operative follow up outcomes;</li> <li>- incidence of infection-related mortality;</li> <li>- prognosis among infected patients.</li> </ul>                                                        |
| <b>Study methodology</b>    | Trials, case-control studies, cohort studies or other observational study designs containing original data.<br><br>Relevant review articles without original data were identified for reference list screening.                                                                                                                                                                                                                                                                                                    | Case reports.<br>Descriptive studies without a comparison group.<br><br>Studies with fewer than 30 participants in either the exposed or unexposed categories.                                                                                                                                                                                           |
| <b>Publication details</b>  | Any publication date.<br>Languages: English, German, French.                                                                                                                                                                                                                                                                                                                                                                                                                                                       |                                                                                                                                                                                                                                                                                                                                                          |

Supplementary Table 5: Quality assessment of studies including rationale (n=14)

1  
2  
3  
4  
5  
6

|    | Case-control studies                                               |                                                                                |                                                                                |                                                                                        | Cohort studies                                                                             |                                                                                                         |                                                                                |                                                   |                                                  |                                                   |                                                   |                                                   |                                                                                |                                                                                    |
|----|--------------------------------------------------------------------|--------------------------------------------------------------------------------|--------------------------------------------------------------------------------|----------------------------------------------------------------------------------------|--------------------------------------------------------------------------------------------|---------------------------------------------------------------------------------------------------------|--------------------------------------------------------------------------------|---------------------------------------------------|--------------------------------------------------|---------------------------------------------------|---------------------------------------------------|---------------------------------------------------|--------------------------------------------------------------------------------|------------------------------------------------------------------------------------|
|    | Vinogradova 2009 (16)                                              | Watt 2007 (17)                                                                 | Loeb 2009 (18)                                                                 | Schnoor 2007 (19)                                                                      | Higgins 1989 (22)                                                                          | Hackam 2006 (24)                                                                                        | Dalrymple 2012 (23)                                                            | Karunajeewa 2005 (25)                             | James 2008 (26)                                  | James 2009 (27)                                   | Wang 2012 (28)                                    | Caljouw 2011 (29)                                 | Campbell 2011 * (21)                                                           | USRDS 2010(20)                                                                     |
| 7  |                                                                    |                                                                                |                                                                                |                                                                                        |                                                                                            |                                                                                                         |                                                                                |                                                   |                                                  |                                                   |                                                   |                                                   |                                                                                |                                                                                    |
| 8  |                                                                    |                                                                                |                                                                                |                                                                                        |                                                                                            |                                                                                                         |                                                                                |                                                   |                                                  |                                                   |                                                   |                                                   |                                                                                |                                                                                    |
| 9  |                                                                    |                                                                                |                                                                                |                                                                                        |                                                                                            |                                                                                                         |                                                                                |                                                   |                                                  |                                                   |                                                   |                                                   |                                                                                |                                                                                    |
| 10 | <b>Selection bias</b>                                              |                                                                                |                                                                                |                                                                                        |                                                                                            |                                                                                                         |                                                                                |                                                   |                                                  |                                                   |                                                   |                                                   |                                                                                |                                                                                    |
| 11 | Selection of controls <sup>1</sup>                                 | Low: matched selection of primary care registered patients                     | Low: neighbourhood controls selected systematically by proximity               | Low: random digit dialling of hospital catchment area residents                        | Low: random selection from population register                                             | N/A: cohort study                                                                                       | N/A: cohort study                                                              | N/A: cohort study                                 | N/A: cohort study                                | N/A: cohort study                                 | N/A: cohort study                                 | N/A: cohort study                                 | N/A: cohort study                                                              | N/A: cohort study                                                                  |
| 12 |                                                                    |                                                                                |                                                                                |                                                                                        |                                                                                            |                                                                                                         |                                                                                |                                                   |                                                  |                                                   |                                                   |                                                   |                                                                                |                                                                                    |
| 13 |                                                                    |                                                                                |                                                                                |                                                                                        |                                                                                            |                                                                                                         |                                                                                |                                                   |                                                  |                                                   |                                                   |                                                   |                                                                                |                                                                                    |
| 14 |                                                                    |                                                                                |                                                                                |                                                                                        |                                                                                            |                                                                                                         |                                                                                |                                                   |                                                  |                                                   |                                                   |                                                   |                                                                                |                                                                                    |
| 15 |                                                                    |                                                                                |                                                                                |                                                                                        |                                                                                            |                                                                                                         |                                                                                |                                                   |                                                  |                                                   |                                                   |                                                   |                                                                                |                                                                                    |
| 16 |                                                                    |                                                                                |                                                                                |                                                                                        |                                                                                            |                                                                                                         |                                                                                |                                                   |                                                  |                                                   |                                                   |                                                   |                                                                                |                                                                                    |
| 17 | Participation bias <sup>2</sup>                                    | Low: automatic participation                                                   | Low: participation 83% of cases, 84% of controls                               | Uncertain: participation rate not reported                                             | High: Participation <60% overall                                                           | N/A: cohort study                                                                                       | N/A: cohort study                                                              | N/A: cohort study                                 | N/A: cohort study                                | N/A: cohort study                                 | N/A: cohort study                                 | N/A: cohort study                                 | N/A: cohort study                                                              | N/A: cohort study                                                                  |
| 18 |                                                                    |                                                                                |                                                                                |                                                                                        |                                                                                            |                                                                                                         |                                                                                |                                                   |                                                  |                                                   |                                                   |                                                   |                                                                                |                                                                                    |
| 19 |                                                                    |                                                                                |                                                                                |                                                                                        |                                                                                            |                                                                                                         |                                                                                |                                                   |                                                  |                                                   |                                                   |                                                   |                                                                                |                                                                                    |
| 20 |                                                                    |                                                                                |                                                                                |                                                                                        |                                                                                            |                                                                                                         |                                                                                |                                                   |                                                  |                                                   |                                                   |                                                   |                                                                                |                                                                                    |
| 21 | Loss to follow up <sup>3</sup>                                     | N/A: case-control study                                                        | N/A: case-control study                                                        | N/A: case-control study                                                                | N/A: case-control study                                                                    | Uncertain: not reported and clinically determined. May be differential, but study period only one year. | Low: automated follow up                                                       | Low: >80% follow up                               | Low: automated follow up                         | Low: automated follow up                          | Low: automated follow up                          | Low: >80% follow-up                               | Low: followed up 479 of 551 participants alive aged 86 years: 86% follow up    | Low: active case-finding applied to national census figure (no follow up required) |
| 22 |                                                                    |                                                                                |                                                                                |                                                                                        |                                                                                            |                                                                                                         |                                                                                |                                                   |                                                  |                                                   |                                                   |                                                   |                                                                                |                                                                                    |
| 23 |                                                                    |                                                                                |                                                                                |                                                                                        |                                                                                            |                                                                                                         |                                                                                |                                                   |                                                  |                                                   |                                                   |                                                   |                                                                                |                                                                                    |
| 24 |                                                                    |                                                                                |                                                                                |                                                                                        |                                                                                            |                                                                                                         |                                                                                |                                                   |                                                  |                                                   |                                                   |                                                   |                                                                                |                                                                                    |
| 25 |                                                                    |                                                                                |                                                                                |                                                                                        |                                                                                            |                                                                                                         |                                                                                |                                                   |                                                  |                                                   |                                                   |                                                   |                                                                                |                                                                                    |
| 26 |                                                                    |                                                                                |                                                                                |                                                                                        |                                                                                            |                                                                                                         |                                                                                |                                                   |                                                  |                                                   |                                                   |                                                   |                                                                                |                                                                                    |
| 27 |                                                                    |                                                                                |                                                                                |                                                                                        |                                                                                            |                                                                                                         |                                                                                |                                                   |                                                  |                                                   |                                                   |                                                   |                                                                                |                                                                                    |
| 28 | <b>Non-differential misclassification of exposure <sup>4</sup></b> | High: relies on medical diagnosis of chronic renal disease in medical records. | High: relied on medical diagnosis of chronic renal disease in medical records. | High: ascertained medical diagnosis of chronic renal disease in participant interview. | High: ascertained medical diagnosis of chronic renal disease in questionnaire for controls | Uncertain: not reported when creatinine measured.                                                       | High: relies on medical diagnosis of chronic renal disease in medical records. | Low: determined prospectively from blood results  | Low: determined prospectively from test results  | Low: determined prospectively from blood results  | Low: determined prospectively from blood results  | Low: determined prospectively from blood results  | High: relies on medical diagnosis of chronic renal disease in medical records. | High: relies on medical diagnosis of chronic renal disease in insurance claims     |
| 29 |                                                                    |                                                                                |                                                                                |                                                                                        |                                                                                            |                                                                                                         |                                                                                |                                                   |                                                  |                                                   |                                                   |                                                   |                                                                                |                                                                                    |
| 30 |                                                                    |                                                                                |                                                                                |                                                                                        |                                                                                            |                                                                                                         |                                                                                |                                                   |                                                  |                                                   |                                                   |                                                   |                                                                                |                                                                                    |
| 31 |                                                                    |                                                                                |                                                                                |                                                                                        |                                                                                            |                                                                                                         |                                                                                |                                                   |                                                  |                                                   |                                                   |                                                   |                                                                                |                                                                                    |
| 32 |                                                                    |                                                                                |                                                                                |                                                                                        |                                                                                            |                                                                                                         |                                                                                |                                                   |                                                  |                                                   |                                                   |                                                   |                                                                                |                                                                                    |
| 33 |                                                                    |                                                                                |                                                                                |                                                                                        |                                                                                            |                                                                                                         |                                                                                |                                                   |                                                  |                                                   |                                                   |                                                   |                                                                                |                                                                                    |
| 34 |                                                                    |                                                                                |                                                                                |                                                                                        |                                                                                            |                                                                                                         |                                                                                |                                                   |                                                  |                                                   |                                                   |                                                   |                                                                                |                                                                                    |
| 35 | <b>Information bias: exposure</b>                                  |                                                                                |                                                                                |                                                                                        |                                                                                            |                                                                                                         |                                                                                |                                                   |                                                  |                                                   |                                                   |                                                   |                                                                                |                                                                                    |
| 36 | Recall bias <sup>5</sup>                                           | Low: kidney disease diagnosis ascertained from pre-                            | Low: kidney disease diagnosis ascertained from pre-                            | High: ascertained medical diagnosis of kidney                                          | High: ascertained medical diagnosis of kidney                                              | Low: determined from serum creatinine with clear                                                        | Low: kidney disease diagnosis ascertained from pre-                            | Low: determined prospectively from blood results. | Low: determined prospectively from test results. | Low: determined prospectively from blood results. | Low: determined prospectively from blood results. | Low: determined prospectively from blood results. | Low: kidney disease diagnosis ascertained from pre-                            | Low: kidney disease diagnosis ascertained from pre-                                |
| 37 |                                                                    |                                                                                |                                                                                |                                                                                        |                                                                                            |                                                                                                         |                                                                                |                                                   |                                                  |                                                   |                                                   |                                                   |                                                                                |                                                                                    |
| 38 |                                                                    |                                                                                |                                                                                |                                                                                        |                                                                                            |                                                                                                         |                                                                                |                                                   |                                                  |                                                   |                                                   |                                                   |                                                                                |                                                                                    |
| 39 |                                                                    |                                                                                |                                                                                |                                                                                        |                                                                                            |                                                                                                         |                                                                                |                                                   |                                                  |                                                   |                                                   |                                                   |                                                                                |                                                                                    |
| 40 |                                                                    |                                                                                |                                                                                |                                                                                        |                                                                                            |                                                                                                         |                                                                                |                                                   |                                                  |                                                   |                                                   |                                                   |                                                                                |                                                                                    |
| 41 |                                                                    |                                                                                |                                                                                |                                                                                        |                                                                                            |                                                                                                         |                                                                                |                                                   |                                                  |                                                   |                                                   |                                                   |                                                                                |                                                                                    |

42  
43  
44  
45  
46  
47  
48  
49

1  
2  
3  
4  
5  
6  
7  
8  
9  
10  
11  
12  
13  
14  
15  
16  
17  
18  
19  
20  
21  
22  
23  
24  
25  
26  
27  
28  
29  
30  
31  
32  
33  
34  
35  
36  
37  
38  
39  
40  
41  
42  
43  
44  
45  
46  
47  
48  
49

|                                    |                                                                                     |                                                                                                                                        |                                                                                                                   |                                                                                                        |                                                                                                     |                                                                                                                                                                                   |                                                           |                                                                       |                                                                                                                             |                                                                                                                            |                                                           |                                                           |                                                                                                        |                                                               |
|------------------------------------|-------------------------------------------------------------------------------------|----------------------------------------------------------------------------------------------------------------------------------------|-------------------------------------------------------------------------------------------------------------------|--------------------------------------------------------------------------------------------------------|-----------------------------------------------------------------------------------------------------|-----------------------------------------------------------------------------------------------------------------------------------------------------------------------------------|-----------------------------------------------------------|-----------------------------------------------------------------------|-----------------------------------------------------------------------------------------------------------------------------|----------------------------------------------------------------------------------------------------------------------------|-----------------------------------------------------------|-----------------------------------------------------------|--------------------------------------------------------------------------------------------------------|---------------------------------------------------------------|
|                                    | existing medical records                                                            | existing medical records                                                                                                               | disease in participant interview in hospital for cases and at home for controls                                   | disease at home for controls                                                                           | cut-off (objective measure)                                                                         | existing medical records                                                                                                                                                          |                                                           |                                                                       |                                                                                                                             |                                                                                                                            |                                                           |                                                           | existing medical records                                                                               | existing insurance records                                    |
| observer bias <sup>6</sup>         | Low: used pre-specified codes to define kidney disease status                       | Uncertain: Medical record abstractors not blinded to case-control status and criteria for assigning kidney disease status not reported | High: interviewers aware of case status (interviewed in hospital) or control status (telephone interview at home) | High: decision to list diagnosis of kidney disease in case report made in context of illness for cases | Low: determined from serum creatinine with clear cut-off (objective measure)                        | Uncertain: source of kidney disease status data not reported. If hospital records are used, decision to list diagnosis in discharge record made in context of illness for cases.  | Low: determined from serum cystatin C (objective measure) | Low: determined from blood and urine test results (objective measure) | Low: determined from serum creatinine (objective measure)                                                                   | Low: determined from serum creatinine (objective measure)                                                                  | Low: determined from serum creatinine (objective measure) | Low: determined from serum creatinine (objective measure) | High: decision to list diagnosis of kidney disease in case report made in context of illness for cases | Low: used pre-specified codes to define kidney disease status |
| ascertainment <sup>7</sup>         | Low: chronic kidney disease diagnosis would have to predate current acute infection | Low: chronic kidney disease diagnosis would have to predate current acute infection                                                    | Low: chronic kidney disease diagnosis would have to predate current acute infection                               | High: ascertainment entirely different for cases than controls                                         | Uncertain: not reported when creatinine measured, or whether this is recurrent/ prompted by illness | Uncertain: source of kidney disease status data not reported. If hospital records used, patients with infection-related hospitalisations more likely to have CKD status recorded. | Low: all participants tested at baseline.                 | Low: participants monitored annually.                                 | Low: baseline measure used (that only patients with a result were eligible was considered a limitation to generalisability) | Low: sensitivity analysis using only the baseline creatinine test found similar results to the last-carried forward method | Low: all participants tested at baseline.                 | Low: all participants tested at baseline.                 | High: ascertainment entirely different for cases than non-cases                                        | Low: kidney disease status ascertained in year prior to study |
| Non-differential misclassification | Low: medical diagnosis of severe                                                    | Low: active surveillance with clear                                                                                                    | Low: severe outcome with clear                                                                                    | Low: severe outcome with clear                                                                         | Uncertain: methods for ascertaining                                                                 | Low: severe outcome with widely                                                                                                                                                   | Low: severe outcome with clear                            | Low: severe outcome with widely                                       | Low: severe outcome with clear                                                                                              | Low: severe outcome with widely                                                                                            | Low: severe outcome with clear                            | Uncertain: kidney disease                                 | Uncertain: sending of PCR test                                                                         | Low: severe outcome unlikely to                               |

1  
2  
3  
4

|                                                                      |                                 |                                                                                                          |                                                                                                         |                                                                                       |                                                                                                       |                                                                                                              |                                                                                                    |                                                                                                    |                                                                                                    |                                                                                       |                                                                                                    |                                                                                       |                                                                                                                                                          |                                                                                         |                                                                                                    |
|----------------------------------------------------------------------|---------------------------------|----------------------------------------------------------------------------------------------------------|---------------------------------------------------------------------------------------------------------|---------------------------------------------------------------------------------------|-------------------------------------------------------------------------------------------------------|--------------------------------------------------------------------------------------------------------------|----------------------------------------------------------------------------------------------------|----------------------------------------------------------------------------------------------------|----------------------------------------------------------------------------------------------------|---------------------------------------------------------------------------------------|----------------------------------------------------------------------------------------------------|---------------------------------------------------------------------------------------|----------------------------------------------------------------------------------------------------------------------------------------------------------|-----------------------------------------------------------------------------------------|----------------------------------------------------------------------------------------------------|
| 5<br>6<br>7<br>8<br>9<br>10<br>11                                    | Outcome of outcome <sup>8</sup> | outcome                                                                                                  | criteria                                                                                                | criteria                                                                              | criteria                                                                                              | infection not reported                                                                                       | accepted clinical criteria                                                                         | criteria                                                                                           | accepted clinical criteria                                                                         | criteria                                                                              | accepted clinical criteria                                                                         | criteria                                                                              | status may affect healthcare attendance for minor illness such as UTI                                                                                    | during influenza pandemic vulnerable to be influenced by kidney disease status          | be missed                                                                                          |
| 12<br>13<br>14                                                       | Information Bias: Outcome       |                                                                                                          |                                                                                                         |                                                                                       |                                                                                                       |                                                                                                              |                                                                                                    |                                                                                                    |                                                                                                    |                                                                                       |                                                                                                    |                                                                                       |                                                                                                                                                          |                                                                                         |                                                                                                    |
| 15<br>16<br>17<br>18<br>19<br>20                                     | Recall bias <sup>9</sup>        | Low: cases identified from medical records based on GP diagnosis                                         | Low: cases identified by laboratory surveillance                                                        | Low: cases determined by medical diagnosis in hospital                                | Low: Low: realtime reporting system through established surveillance network                          | Uncertain: methods for ascertaining infection not reported                                                   | Low: monitoring of all hospital discharge reports                                                  | Low: semi-annual cohort monitoring                                                                 | Low: monitoring of all hospital discharge reports                                                  | Low: monitoring of all biochemistry results                                           | Low: monitoring of all hospital discharge reports                                                  | Low: semi-annual cohort monitoring                                                    | Low: annual clinician interviews supplemented with medical record review                                                                                 | Low: realtime case finding system through laboratory results                            | Low: monitoring of all hospital insurance claims                                                   |
| 21<br>22<br>23<br>24<br>25<br>26<br>27<br>28<br>29<br>30<br>31<br>32 | Observer bias <sup>10</sup>     | Low: clinical diagnosis of severe outcome unlikely to be severely affected by kidney disease comorbidity | Low: Laboratory based surveillance system with clear criteria for cases                                 | Low: CKD status unlikely to severely affect physician application of clear criteria   | Low: surveillance system with clear criteria for cases                                                | Uncertain: standard definition of APN is vague and not reported whether any observer blinded to renal status | Low: kidney disease status unlikely to affect choice of hospital diagnosis code for severe outcome | Low: kidney disease status unlikely to affect choice of hospital diagnosis code for severe outcome | Low: kidney disease status unlikely to affect choice of hospital diagnosis code for severe outcome | Low: objective definition of outcome independent of exposure status                   | Low: kidney disease status unlikely to affect choice of hospital diagnosis code for severe outcome | Low: CKD status unlikely to severely affect application of clear criteria             | Low: kidney disease status unlikely to strongly influence diagnosis of UTI at age 86-89 years, given case criteria include symptoms and urinary analysis | Low: objective criteria for cases once tested                                           | Low: kidney disease status unlikely to affect choice of hospital diagnosis code for severe outcome |
| 33<br>34<br>35<br>36<br>37<br>38<br>39<br>40                         | Ascertainment <sup>11</sup>     | Low: kidney disease status unlikely to affect primary care attendance with severe outcome                | Low: active surveillance with clear criteria, testing for IPD unlikely to be markedly influenced by CKD | Low: kidney disease status unlikely to affect hospital attendance with severe outcome | Low: kidney disease status unlikely to affect primary care or hospital attendance with severe outcome | Uncertain: methods for ascertaining infection not reported                                                   | Low: kidney disease status unlikely to affect diagnosis of severe outcome with widely accepted     | Low: kidney disease status unlikely to affect hospital attendance with severe outcome              | Low: kidney disease status unlikely to affect hospital attendance with severe outcome              | Low: kidney disease status unlikely to affect hospital attendance with severe outcome | Low: kidney disease status unlikely to affect diagnosis of severe outcome with widely accepted     | Low: kidney disease status unlikely to affect hospital attendance with severe outcome | Uncertain: kidney disease status may affect healthcare attendance for minor illness such as UTI                                                          | Uncertain: sending of PCR test during influenza pandemic vulnerable to be influenced by | Low: kidney disease status unlikely to affect hospital attendance with severe outcome              |

41  
42  
43  
44  
45

46  
47  
48  
49



1  
2  
3  
4  
5  
6  
7  
8  
9  
10  
11  
12  
13  
14  
15  
16  
17  
18  
19  
20  
21  
22  
23  
24  
25  
26  
27  
28  
29  
30  
31  
32  
33  
34  
35  
36  
37  
38  
39  
40  
41  
42  
43  
44  
45  
46  
47  
48  
49

|                                        |                                                                                                                                 |                                                                                                     |                                                                                |                                                                |                                                                                                 |                                                                                                            |                                                                                                |                                             |                                                                                           |                                                                                                             |                                                                                             |                                                       |                                                                |                                                               |
|----------------------------------------|---------------------------------------------------------------------------------------------------------------------------------|-----------------------------------------------------------------------------------------------------|--------------------------------------------------------------------------------|----------------------------------------------------------------|-------------------------------------------------------------------------------------------------|------------------------------------------------------------------------------------------------------------|------------------------------------------------------------------------------------------------|---------------------------------------------|-------------------------------------------------------------------------------------------|-------------------------------------------------------------------------------------------------------------|---------------------------------------------------------------------------------------------|-------------------------------------------------------|----------------------------------------------------------------|---------------------------------------------------------------|
|                                        |                                                                                                                                 | status in context of known high incidence among the Navajo Nation                                   |                                                                                |                                                                |                                                                                                 | clinical criteria                                                                                          |                                                                                                |                                             | illness                                                                                   | clinical                                                                                                    |                                                                                             |                                                       | comorbidities                                                  |                                                               |
| <b>Confounding</b>                     | Low: controls matched to cases on age and sex, estimate adjusted for wide range of confounders including diabetes <sup>13</sup> | Low: controls matched for age and sex. Diabetes eligible for inclusion in final model <sup>14</sup> | Low: Age, sex and diabetes eligible for inclusion in final model <sup>15</sup> | High: unadjusted                                               | High: unadjusted estimate. In particular, high immunosuppressant use among the study population | Low: adjusted for age, sex, nature of index event, charlson index, healthcare use, and other comorbidities | Low: adjusted for age, sex, race, smoking, BMI, diabetes mellitus, and multiple comorbidities. | High: no adjustment for sex <sup>16</sup>   | Low: adjusted for age, sex, diabetes, comorbidity score, care in a dedicated renal clinic | Low: adjusted for age, sex, socio-economic status, ethnicity, diabetes mellitus, Charlson comorbidity score | High: adjusted for age, sex, alcohol, smoking and demographic factors but no comorbidities. | High: no adjustment for sex or diabetes <sup>17</sup> | High: adjusted for age only                                    | High: unadjusted <sup>19</sup>                                |
| <b>Reverse causation</b> <sup>18</sup> | Low: pre-existing kidney disease reported at time of infection                                                                  | Low: pre-existing kidney disease reported at time of infection                                      | Low: pre-existing kidney disease reported at time of infection                 | Low: pre-existing kidney disease reported at time of infection | Uncertain: Timing of creatinine measurement relative to infections not specified                | Low: chronic renal failure should not be diagnosed within one hospital episode for infection               | Low: baseline serum cystatin C used                                                            | Low: serum biochemistry tested at screening | Low: baseline creatinine used                                                             | Low: only followed to first outcome event, creatinine result predates qualifying infection                  | Low: baseline creatinine used                                                               | Low: baseline creatinine used                         | Low: pre-existing kidney disease reported at time of infection | Low: kidney disease status established in year prior to study |

\*The unusual design of the artificial cohort study by Campbell *et al.* is worth clarification. During the 2009–2010 influenza pandemic, hospitalised cases of laboratory confirmed pandemic influenza A (H1N1) were reported by a laboratory-based national surveillance system. The surveillance report, completed by the microbiologist, asked whether the case had a diagnosis of CKD. Denominators for infection rates were obtained from primary care registers of patients eligible for pandemic influenza vaccination by virtue of a CKD diagnosis (for CKD): and from the national census (for non-CKD).<sup>(29)</sup> The effect of CKD on influenza may be overestimated in this study, because CKD was advertised as a possible risk factor for pandemic influenza to encourage vaccine uptake among this group, and patients with flu-like symptoms could have been more likely to attend hospital or be tested for pandemic influenza A (H1N1) if they had a diagnosis of CKD.

- 1. High risk: probability of selection as a control likely to be affected by kidney disease status (known or unknown).
- Low risk: controls selected using random sampling (or other system unlikely to be biased by kidney disease status) from the population from which the cases arose.

- 1  
2  
3  
4  
5 2. Low risk: (1) automated participation (e.g. medical record review), or (2)  $\geq 80\%$  participation, or (3) 70-80% participation with a comparison (min age, sex,  
6 death/morbidity) showing similar characteristics between those included and those not included in the study.
- 7  
8 3. Low risk: (1) automated follow up (e.g. through record linkage), or (2)  $\geq 80\%$  follow up, or (3) 70-80% follow up with a comparison (min age, sex,  
9 death/morbidity) showing similar characteristics between those included and those not included in the study.
- 10 4. High risk: allocation of kidney disease status relies on existing kidney disease having been diagnosed as part of routine medical care.  
11 Low risk: All members of study assessed for kidney disease at baseline.
- 12 5. High risk: kidney disease status defined by patient recall of CKD diagnosis in context of recent infection.
- 13 6. High risk: kidney disease status defined by observer unblinded to case status, without clear objective criteria to apply.
- 14 7. High risk: participants with infections are more or less likely to be tested for kidney disease.
- 15 8. Low risk: Active screening for infection, or severe outcome unlikely to be missed or presents validation results of  $>70\%$  sensitivity and specificity
- 16 9. High risk: infection status defined by patient recall of infection in context of kidney disease e.g. participants with kidney disease asked to recall infections  
17 while at renal clinic.
- 18 10. High risk: infection status defined by observer in context likely to be influenced by kidney disease status (assumed that clinical diagnosis of severe  
19 infections was unlikely to be strongly influenced by awareness of CKD as a comorbidity but that less severe infections may be influenced by this in the  
20 absence of clear diagnostic criteria).
- 21 11. High risk: ascertainment of infections likely to be influenced by kidney disease status (assumed that attendance to healthcare facility for severe  
22 infections was unlikely to be strongly influenced by awareness of CKD as a comorbidity but that attendance for less severe infections may be influenced by  
23 this in the absence of active surveillance).
- 24 12. Low risk: At least age, sex and diabetes must have been eligible and considered for the final model.
- 25 13. Controls matched to cases on age at index data (within 1 year), sex, general practice, and calendar time. Estimate adjusted for smoking status,  
26 Townsend deprivation score, use of influenza vaccine in previous 12 months, use of pneumococcal vaccine in previous 5 years, number of years of medical  
27 records data available in database, and comorbidities including: diabetes, chronic heart disease, chronic respiratory disease, asplenia, cerebrospinal shunt,  
28 chronic liver disease, sickle cell disease or coeliac disease, cochlear implant, HIV/AIDS, immunosuppression, stroke or transient ischaemic attack,  
29 rheumatoid arthritis, Parkinson's disease, multiple sclerosis, dementia, osteoporosis, and any cancer.
- 30 14. Controls matched for age and sex. Diabetes eligible for inclusion in final model, which was adjusted for age, pneumococcal vaccine, congestive heart  
31 failure, alcohol use, BMI and unemployment.
- 32 15. Age, sex and diabetes eligible for inclusion in final model. Final model adjusted for age, non-English language at home, living in a detached house, living  
33 alone, congestive heart failure, chronic obstructive pulmonary disease, dysphagia, Barthel index of functional status, immunosuppressive medications,  
34 nutritional score, tobacco use, alcohol use, and exposure to fumes.
- 35  
36  
37  
38  
39  
40  
41  
42  
43  
44  
45  
46  
47  
48  
49

- 1
- 2
- 3
- 4
- 5 16. The best adjusted estimate for urinary sepsis is adjusted for asymptomatic bacteriuria and age, and restricted to diabetics, but not adjusted for sex.
- 6 17. High risk: age-restricted and stratified by long term care facility (LCTF) residency, but no management of confounding by sex or co-morbidities.
- 7 18. High risk: exposure defined after the infection defined as the study outcome.
- 8 19. Rate ratios for hospitalisation with UTI, pneumonia and bacteraemia/ sepsis unadjusted. Rate ratios for hospitalisation with any infection calculated as
- 9 the ratio of the rate among participants with CKD, compared with no CKD, each rate having been adjusted for gender, prior hospitalisation, ASHD, CHF, CVA,
- 10 PVD, dysrhythmia, other cardiac disease, diabetes, COPD, hypertension, liver disease, gastrointestinal disease, cancer, and anemia.
- 11
- 12
- 13
- 14
- 15
- 16
- 17
- 18
- 19
- 20
- 21
- 22
- 23
- 24
- 25
- 26
- 27
- 28
- 29
- 30
- 31
- 32
- 33
- 34
- 35
- 36
- 37
- 38
- 39
- 40
- 41
- 42
- 43
- 44
- 45
- 46
- 47
- 48
- 49

**Supplementary Figure 1:** Funnel plot showing the relationship between relative risk and standard error for the 17 estimates from all 12 studies considered for meta-analysis (all infections combined)

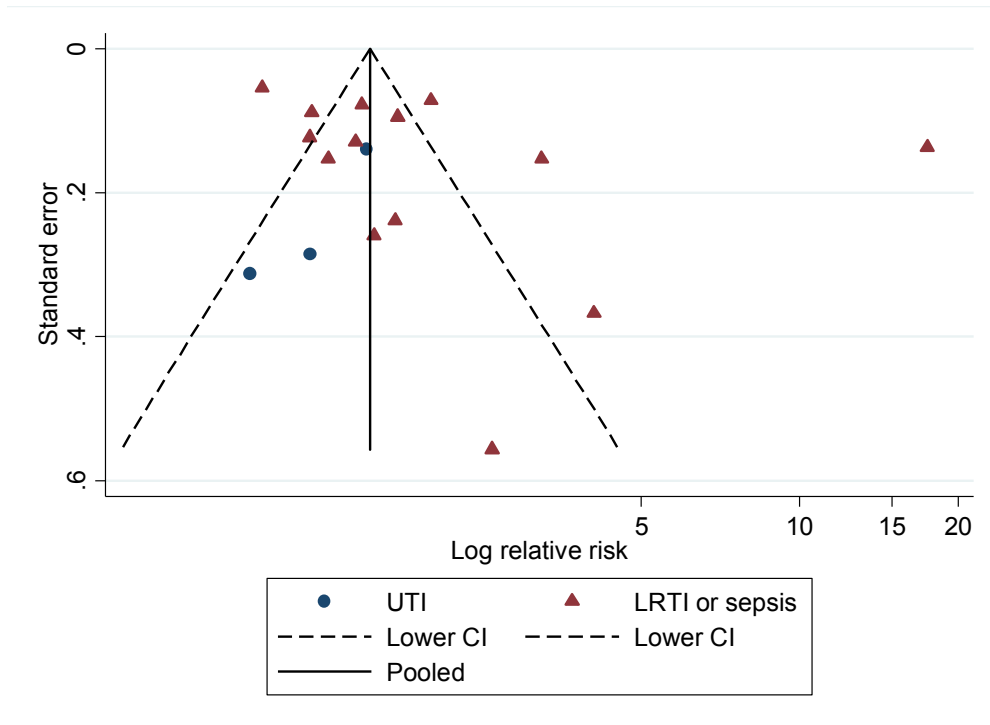

UTI = urinary tract infection

Other infections comprised lower respiratory tract infections and sepsis.

Review only



# PRISMA 2009 Checklist

| Section/topic                      | #  | Checklist item                                                                                                                                                                                                                                                                                              | Reported on page #     |
|------------------------------------|----|-------------------------------------------------------------------------------------------------------------------------------------------------------------------------------------------------------------------------------------------------------------------------------------------------------------|------------------------|
| <b>TITLE</b>                       |    |                                                                                                                                                                                                                                                                                                             |                        |
| Title                              | 1  | Identify the report as a systematic review, meta-analysis, or both.                                                                                                                                                                                                                                         | 1                      |
| <b>ABSTRACT</b>                    |    |                                                                                                                                                                                                                                                                                                             |                        |
| Structured summary                 | 2  | Provide a structured summary including, as applicable: background; objectives; data sources; study eligibility criteria, participants, and interventions; study appraisal and synthesis methods; results; limitations; conclusions and implications of key findings; systematic review registration number. | 2                      |
| <b>INTRODUCTION</b>                |    |                                                                                                                                                                                                                                                                                                             |                        |
| Rationale                          | 3  | Describe the rationale for the review in the context of what is already known.                                                                                                                                                                                                                              | 6                      |
| Objectives                         | 4  | Provide an explicit statement of questions being addressed with reference to participants, interventions, comparisons, outcomes, and study design (PICOS).                                                                                                                                                  | 7                      |
| <b>METHODS</b>                     |    |                                                                                                                                                                                                                                                                                                             |                        |
| Protocol and registration          | 5  | Indicate if a review protocol exists, if and where it can be accessed (e.g., Web address), and, if available, provide registration information including registration number.                                                                                                                               | 8                      |
| Eligibility criteria               | 6  | Specify study characteristics (e.g., PICOS, length of follow-up) and report characteristics (e.g., years considered, language, publication status) used as criteria for eligibility, giving rationale.                                                                                                      | 8 and Appendix Table 4 |
| Information sources                | 7  | Describe all information sources (e.g., databases with dates of coverage, contact with study authors to identify additional studies) in the search and date last searched.                                                                                                                                  | 8                      |
| Search                             | 8  | Present full electronic search strategy for at least one database, including any limits used, such that it could be repeated.                                                                                                                                                                               | Appendix Tables 1-3    |
| Study selection                    | 9  | State the process for selecting studies (i.e., screening, eligibility, included in systematic review, and, if applicable, included in the meta-analysis).                                                                                                                                                   | 8                      |
| Data collection process            | 10 | Describe method of data extraction from reports (e.g., piloted forms, independently, in duplicate) and any processes for obtaining and confirming data from investigators.                                                                                                                                  | 7                      |
| Data items                         | 11 | List and define all variables for which data were sought (e.g., PICOS, funding sources) and any assumptions and simplifications made.                                                                                                                                                                       | 7                      |
| Risk of bias in individual studies | 12 | Describe methods used for assessing risk of bias of individual studies (including specification of whether this was done at the study or outcome level), and how this information is to be used in any data synthesis.                                                                                      | 9                      |
| Summary measures                   | 13 | State the principal summary measures (e.g., risk ratio, difference in means).                                                                                                                                                                                                                               | 9                      |

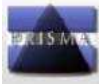

# PRISMA 2009 Checklist

|                      |    |                                                                                                                                                           |    |
|----------------------|----|-----------------------------------------------------------------------------------------------------------------------------------------------------------|----|
| Synthesis of results | 14 | Describe the methods of handling data and combining results of studies, if done, including measures of consistency (e.g., $I^2$ ) for each meta-analysis. | 10 |
|----------------------|----|-----------------------------------------------------------------------------------------------------------------------------------------------------------|----|

Page 1 of 2

| Section/topic                 | #  | Checklist item                                                                                                                                                                                           | Reported on page #       |
|-------------------------------|----|----------------------------------------------------------------------------------------------------------------------------------------------------------------------------------------------------------|--------------------------|
| Risk of bias across studies   | 15 | Specify any assessment of risk of bias that may affect the cumulative evidence (e.g., publication bias, selective reporting within studies).                                                             | 10                       |
| Additional analyses           | 16 | Describe methods of additional analyses (e.g., sensitivity or subgroup analyses, meta-regression), if done, indicating which were pre-specified.                                                         | 10                       |
| <b>RESULTS</b>                |    |                                                                                                                                                                                                          |                          |
| Study selection               | 17 | Give numbers of studies screened, assessed for eligibility, and included in the review, with reasons for exclusions at each stage, ideally with a flow diagram.                                          | 12 and figure 1          |
| Study characteristics         | 18 | For each study, present characteristics for which data were extracted (e.g., study size, PICOS, follow-up period) and provide the citations.                                                             | 12 and Table 1           |
| Risk of bias within studies   | 19 | Present data on risk of bias of each study and, if available, any outcome level assessment (see item 12).                                                                                                | 14 and Table 2           |
| Results of individual studies | 20 | For all outcomes considered (benefits or harms), present, for each study: (a) simple summary data for each intervention group (b) effect estimates and confidence intervals, ideally with a forest plot. | 13 and Figure 2          |
| Synthesis of results          | 21 | Present results of each meta-analysis done, including confidence intervals and measures of consistency.                                                                                                  | 13 and Figure 2          |
| Risk of bias across studies   | 22 | Present results of any assessment of risk of bias across studies (see Item 15).                                                                                                                          | 14 and Appendix Figure 1 |
| Additional analysis           | 23 | Give results of additional analyses, if done (e.g., sensitivity or subgroup analyses, meta-regression [see Item 16]).                                                                                    | 13                       |
| <b>DISCUSSION</b>             |    |                                                                                                                                                                                                          |                          |
| Summary of evidence           | 24 | Summarize the main findings including the strength of evidence for each main outcome; consider their relevance to key groups (e.g., healthcare providers, users, and policy makers).                     | 22                       |
| Limitations                   | 25 | Discuss limitations at study and outcome level (e.g., risk of bias), and at review-level (e.g., incomplete retrieval of identified research, reporting bias).                                            | 22,24                    |
| Conclusions                   | 26 | Provide a general interpretation of the results in the context of other evidence, and implications for future research.                                                                                  | 25-26                    |
| <b>FUNDING</b>                |    |                                                                                                                                                                                                          |                          |



# PRISMA 2009 Checklist

1  
2  
3  
4  
5  
6  
7  
8  
9  
10  
11  
12  
13  
14  
15  
16  
17  
18  
19  
20  
21  
22  
23  
24  
25  
26  
27  
28  
29  
30  
31  
32  
33  
34  
35  
36  
37  
38  
39  
40  
41  
42  
43  
44  
45  
46  
47  
48  
49

|         |    |                                                                                                                                            |    |
|---------|----|--------------------------------------------------------------------------------------------------------------------------------------------|----|
| Funding | 27 | Describe sources of funding for the systematic review and other support (e.g., supply of data); role of funders for the systematic review. | 31 |
|---------|----|--------------------------------------------------------------------------------------------------------------------------------------------|----|

From: Moher D, Liberati A, Tetzlaff J, Altman DG, The PRISMA Group (2009). Preferred Reporting Items for Systematic Reviews and Meta-Analyses: The PRISMA Statement. PLoS Med 6(6): e1000097. doi:10.1371/journal.pmed1000097

For more information, visit: [www.prisma-statement.org](http://www.prisma-statement.org).

Page 2 of 2

For peer review only
